# Supplementary material
Source: publisher figshare collection journal article supplement (https://springernature.figshare.com/ndownloader/files/12998384)
Supplement: Supplementary file 1 [file 12998384]

## Sheet: Sheet1
Gene Name	Control 1 NCK2 SH3	Control 2 EGFP	Control 3 TLR4 IC	Control 4 LCP2 (1)	Control 5 PINCH1 LIM4	Control 6 TP53 (1)	Control 7 TP53 (2)	Control 8 TP53 (3)	Control 9 TP73	Control 10 EIF2C2 (1)	Control 11 EIF2C2 (2)	Control 12 EIF2C2 (3)	Control 13 LCP2 (2)	Control 14 GRAP2	Control 15 CSK1B	A20 (1)	A20 (2)	A20 (3)	A20 TNF (1)	A20 TNF (2)	A20 TNF (3)	TRADD (1)	TRADD (2)	TRADD (3)	TRADD TNF (1)	TRADD TNF (2)	TRADD TNF (3)	NEMO (1)	NEMO (2)	NEMO (3)	NEMO TNF (1)	NEMO TNF (2)	NEMO TNF (3)	FADD (1)	FADD (2)	FADD (3)	FADD TNF (1)	FADD TNF (2)	FADD TNF (3)	TANK (1)	TANK (2)	TANK (3)	TANK TNF (1)	TANK TNF (2)	TANK TNF (3)	TRAF2 (1)	TRAF2 (2)	TRAF2 (3)	TRAF2 TNF (1)
A2M	7	6	5	2	1	4	6	6	6	6	4	5	1	2	4	4	8	9	2	5	6	7	5	3	5	7	6	4	5	4	2	4	7	8	4	4	3	7	4	5	2	2	5	5	2	4	4	3	2
ACLY	5	2	1	10	13	3	8	12	15	18	20	14	3	3	5	9	18	23	5	1	2	19	13	21	8	5	8	8	11	16	11	6	9	1	0	0	13	15	12	7	11	10	19	14	14	7	1	4	3
ACO1	4	0	0	8	5	1	3	5	5	3	5	2	0	0	0	3	4	4	2	2	3	1	1	3	6	6	4	3	5	2	2	2	2	2	0	0	4	4	2	1	0	1	7	6	7	5	1	1	1
ACTA2	1	0	0	3	2	1	2	1	2	3	4	4	4	2	1	1	2	3	1	1	1	2	2	2	0	1	1	2	2	4	1	1	1	2	1	1	2	1	2	1	2	2	1	2	4	1	0	1	1
ACTB	28	46	12	14	13	17	10	20	11	9	10	16	26	21	16	17	12	12	10	11	8	7	11	7	8	8	10	9	16	20	0	0	0	27	25	23	0	24	0	10	27	0	16	0	0	11	0	7	9
ACTR1A	2	0	0	1	4	0	0	0	4	3	6	3	0	0	1	1	1	1	0	0	0	3	4	6	1	0	0	0	7	6	0	1	0	0	0	1	2	0	3	1	3	5	2	4	5	0	0	0	0
ACTR2	1	0	0	1	1	0	1	0	3	2	1	1	0	0	0	0	1	3	0	0	1	1	0	2	1	1	1	0	1	2	1	2	0	0	0	0	3	0	3	1	2	2	2	2	0	0	0	0	0
ACTR3	3	0	0	2	0	0	0	2	2	2	0	1	0	0	0	1	1	2	1	0	1	1	0	1	2	2	0	0	4	2	2	0	1	0	1	0	2	1	1	0	2	0	1	2	2	1	0	0	0
ADH5	2	0	0	0	0	0	1	1	0	0	0	0	0	0	0	1	2	2	0	0	0	0	0	0	0	0	0	0	2	2	1	0	0	0	0	0	2	0	0	1	0	0	0	0	0	0	1	1	0
ADK	2	0	0	2	4	0	2	6	2	3	3	2	0	0	0	1	2	1	0	2	1	0	0	1	4	4	1	2	1	1	0	1	3	0	0	1	2	1	2	0	3	3	3	1	0	1	0	0	0
AHCY	13	6	4	5	4	5	5	9	11	10	7	9	3	4	5	8	12	13	6	8	7	9	11	11	6	9	7	12	12	12	7	7	10	7	2	5	7	9	5	4	8	7	13	10	9	6	8	5	7
AHCYL1	1	0	0	1	0	0	0	1	0	1	1	0	0	0	0	0	0	0	0	0	0	1	0	0	1	1	1	0	1	0	0	0	0	1	0	0	1	1	0	0	0	0	1	0	0	1	0	0	0
AHSG	2	4	0	0	0	0	7	0	1	0	0	0	0	0	0	0	2	5	0	0	0	0	4	1	0	1	0	5	0	0	0	0	1	1	1	1	0	2	0	0	6	0	0	0	0	0	0	0	0
AKR1B15	1	0	0	0	0	1	0	1	0	1	0	1	0	0	0	1	1	0	0	0	0	0	1	0	1	1	1	0	0	0	1	1	0	0	0	0	1	1	1	1	1	1	1	1	1	1	1	0	0
ALB	10	31	10	2	1	5	6	6	6	3	1	9	10	5	14	3	8	6	9	5	7	5	6	3	9	15	16	3	5	4	3	21	6	7	6	6	4	10	6	5	14	5	9	3	3	3	4	5	2
ALDOA	2	1	1	0	0	5	4	2	2	2	1	4	7	8	8	0	0	0	2	3	1	2	1	0	0	0	0	0	0	3	0	0	3	2	0	0	0	0	0	0	5	1	0	3	1	0	0	3	3
ANXA11	6	1	6	8	3	5	10	8	8	8	7	10	6	6	8	4	11	10	13	7	8	3	5	6	2	0	4	7	6	7	7	3	13	2	1	2	6	3	2	3	7	5	5	4	3	10	6	4	6
ANXA2	4	0	0	0	0	0	3	6	0	3	5	5	7	9	8	0	1	0	0	0	2	5	0	0	0	0	0	3	0	2	0	0	8	0	0	0	0	0	1	4	14	12	8	4	6	2	4	0	5
ANXA5	3	0	3	2	2	1	6	6	2	6	7	6	7	10	11	1	3	2	4	5	6	4	4	2	0	0	3	1	2	3	1	2	6	1	2	1	0	2	1	0	6	5	3	1	1	7	5	4	8
APMAP	1	0	0	0	0	0	0	0	1	0	0	0	0	1	0	0	0	0	1	0	0	0	0	0	1	1	1	0	0	0	1	0	1	0	1	1	0	1	0	0	0	0	1	0	0	0	0	0	1
APOA1	5	5	3	1	1	1	1	2	2	2	4	3	0	1	1	1	3	4	3	2	3	3	1	2	2	5	2	1	1	5	2	2	2	4	3	2	2	3	2	2	1	2	3	3	2	1	2	2	1
APOB	5	4	3	1	2	0	2	2	5	5	4	6	5	6	6	3	9	5	7	2	3	6	4	5	3	2	3	3	3	2	6	2	6	9	6	6	2	4	4	2	3	3	2	3	3	2	3	4	5
APOC3	1	6	2	1	1	3	2	2	2	2	2	2	2	2	2	2	2	2	2	2	2	2	2	2	2	2	2	2	3	2	2	2	2	1	2	1	2	2	2	1	2	2	2	2	2	2	2	2	2
APOE	5	1	12	4	5	1	3	5	7	5	5	7	6	5	6	5	4	7	4	3	3	9	6	7	3	3	2	7	6	10	3	2	8	3	3	1	5	5	7	3	7	8	6	8	9	3	2	4	3
APOM	2	1	0	0	0	0	3	0	0	1	1	2	1	0	1	1	0	1	1	1	1	1	0	0	0	1	0	1	0	0	1	0	0	1	2	0	0	2	0	1	1	1	1	1	0	1	0	1	1
APRT	3	0	0	1	1	2	2	0	1	4	2	2	1	0	0	2	1	3	1	0	0	2	4	2	1	1	1	3	1	1	1	2	1	1	0	0	2	1	1	1	2	1	2	1	1	1	1	0	0
ARF3	4	10	3	1	2	0	5	6	4	3	1	5	3	4	1	2	3	4	5	4	2	2	6	3	4	3	5	6	5	5	4	1	4	6	7	8	2	5	3	4	5	5	4	4	4	1	3	2	4
ARF4	8	5	1	8	2	0	6	6	5	5	5	6	2	3	2	1	7	6	3	5	5	5	4	5	7	3	8	7	6	9	8	5	7	5	4	2	7	8	4	6	6	6	8	6	5	5	5	6	5
ARF5	2	1	0	3	0	4	2	4	0	2	3	4	2	2	4	0	3	4	2	0	2	2	0	3	0	0	3	0	4	5	3	0	5	3	0	0	3	2	3	4	4	4	3	2	3	2	2	3	2
ARF6	2	0	1	2	0	1	2	2	3	1	1	1	1	1	1	0	2	1	2	3	3	1	2	3	2	0	2	1	2	2	2	1	2	0	2	2	2	1	0	2	2	2	2	1	0	3	0	3	2
ARPC3	1	0	0	1	1	0	0	0	0	0	1	0	1	1	1	1	0	1	0	0	0	2	2	0	0	0	0	0	1	1	0	0	0	0	0	0	1	0	1	0	0	0	0	1	1	0	0	0	0
ARR3	1	0	0	0	0	0	0	0	0	0	0	0	0	0	0	0	1	1	0	0	0	0	0	0	0	0	0	0	0	0	0	0	0	0	0	0	0	0	0	0	0	0	0	0	0	0	0	0	0
ARRDC1	7	1	3	0	1	0	3	1	1	1	0	4	4	4	4	2	5	3	6	3	4	1	0	2	0	0	3	0	1	1	2	1	5	7	4	3	1	0	1	0	4	2	0	0	0	2	0	1	2
ASL	1	0	0	0	0	0	0	0	0	0	0	0	0	0	0	0	0	0	0	0	0	0	0	0	0	0	0	0	0	0	0	0	0	0	0	0	0	0	0	0	0	0	0	0	0	0	0	0	0
ASNS	2	0	0	4	3	3	1	2	5	8	4	5	0	1	0	3	4	5	1	1	0	5	3	7	7	1	1	4	8	12	3	1	1	0	0	0	7	5	4	5	3	5	6	7	3	1	0	0	0
ASPRV1	1	0	0	0	0	0	0	0	0	0	0	0	0	0	0	0	0	0	0	0	0	0	0	0	0	0	0	0	0	0	0	0	0	0	0	0	0	0	0	0	0	0	0	0	0	0	0	0	0
ASS1	4	1	0	4	4	2	4	7	6	6	7	0	0	0	0	5	2	5	0	1	3	1	1	3	6	4	5	0	4	6	4	2	4	1	0	1	4	5	6	4	2	4	7	6	6	3	2	3	2
ATP1A1	17	6	11	13	10	8	12	21	15	18	14	25	28	29	36	18	29	24	28	25	28	23	23	26	3	8	27	7	17	18	11	9	30	31	32	29	19	29	25	14	24	26	19	20	13	19	17	21	17
ATP1B3	4	0	2	4	2	2	2	3	3	5	2	7	6	5	7	1	4	6	5	5	4	4	3	4	2	2	3	1	5	3	2	2	5	5	7	8	4	4	2	2	3	3	0	2	0	5	3	2	6
ATXN2	2	1	1	0	0	0	0	0	0	0	0	0	0	0	0	0	1	1	0	0	0	0	0	0	0	0	0	0	0	0	0	0	0	1	0	1	0	0	0	0	0	0	0	0	0	0	0	0	0
B4GALT1	1	0	0	0	0	0	0	0	0	0	0	0	0	0	0	0	0	0	0	0	0	0	0	0	0	1	0	0	1	0	0	0	0	0	0	0	0	0	0	0	0	0	1	0	0	0	0	0	0
BCLAF1	2	0	0	0	1	0	0	2	0	4	2	1	0	1	0	3	0	0	1	0	0	0	0	1	0	0	0	0	1	3	0	0	0	2	0	0	0	0	0	0	0	0	0	0	0	0	0	0	0
BLMH	1	0	0	1	0	0	0	0	0	0	0	0	0	0	0	0	0	0	0	0	0	0	0	0	0	0	0	0	0	0	0	0	0	0	0	0	0	0	0	0	0	0	0	1	0	0	0	0	0
BLVRB	1	0	0	1	0	2	1	0	1	1	1	1	0	0	0	0	0	0	0	1	2	1	2	0	1	2	2	1	1	1	0	0	1	0	0	0	0	1	1	0	0	1	1	1	1	0	0	1	0
BROX	3	1	3	7	1	2	3	7	2	1	2	2	8	5	8	5	7	11	7	12	9	14	7	10	7	8	14	4	6	5	6	2	11	13	14	11	9	13	8	5	15	12	11	10	8	6	5	7	9
BSG	4	2	2	5	3	1	7	6	7	6	7	8	8	3	10	4	9	8	6	8	6	12	7	7	3	5	6	5	4	7	4	6	11	10	11	11	3	12	7	6	9	6	5	7	3	7	6	7	6
C3	6	0	6	7	3	2	3	5	4	1	3	5	4	3	6	5	4	6	1	9	5	5	5	2	8	10	6	3	8	4	2	4	6	1	1	0	1	5	4	1	6	5	7	5	7	3	3	4	3
CA2	1	0	0	0	0	0	0	2	0	0	0	0	1	0	2	0	0	0	0	1	0	0	0	0	0	0	0	0	0	0	0	0	2	0	0	0	0	0	3	0	1	1	0	1	1	0	0	0	0
CAB39L	1	0	0	0	0	0	0	0	0	0	1	0	1	1	0	0	0	0	0	0	0	0	0	0	0	0	0	0	0	0	0	0	1	0	0	0	0	0	0	0	1	1	0	0	0	0	0	0	0
CAD	3	1	0	9	8	2	4	4	9	12	9	5	0	1	1	7	9	13	4	0	3	10	8	12	3	2	2	5	7	9	4	4	5	1	0	1	8	5	8	5	7	6	10	8	8	3	1	1	0
CALM1	6	3	3	3	5	4	8	11	6	10	8	9	7	7	5	2	6	6	1	2	3	4	6	2	1	1	1	4	5	10	1	1	7	4	2	2	3	4	1	4	5	8	5	0	1	7	2	5	4
CALML5	6	0	0	1	0	0	1	0	0	0	0	0	0	0	0	0	0	0	0	0	0	0	0	1	0	0	0	0	0	0	0	0	1	2	0	0	0	0	0	0	7	2	0	0	0	0	0	0	0
CASP14	3	0	0	0	0	0	0	0	0	0	0	0	0	0	0	0	0	0	0	0	0	0	0	0	0	0	0	0	0	0	0	0	0	0	0	0	0	0	0	0	0	0	0	0	0	0	0	0	0
CBR1	1	0	0	2	1	0	1	2	2	1	2	2	0	0	1	2	0	0	0	0	0	2	2	2	1	1	0	2	2	2	0	0	0	0	0	0	0	0	1	0	2	2	0	2	3	1	0	0	1
CC2D1A	1	0	0	0	0	0	0	3	0	0	0	0	10	1	1	0	1	1	0	0	0	1	3	2	0	0	0	0	6	4	0	0	4	1	5	4	0	3	6	0	13	14	7	4	5	0	1	2	0
CCAR1	1	1	0	0	0	0	0	0	0	1	1	0	0	0	0	0	0	0	0	0	0	0	0	0	0	0	0	0	0	0	0	0	0	0	0	0	0	0	0	0	0	0	0	0	0	0	0	0	0
CCT2	4	0	0	14	8	8	8	6	10	12	10	11	5	5	3	15	11	14	2	0	2	12	9	11	3	1	2	5	8	14	3	2	6	0	1	1	7	5	6	2	11	9	6	12	11	4	2	2	3
CCT3	4	1	0	8	5	1	2	5	5	7	5	2	1	0	3	7	12	9	1	0	0	4	6	4	1	0	0	2	6	6	2	1	3	0	0	0	4	2	3	0	6	3	3	4	5	4	0	1	2
CCT4	2	0	0	8	5	0	5	5	4	6	4	4	0	3	2	4	10	7	0	2	1	7	5	6	3	2	2	2	3	5	1	0	4	0	0	0	3	2	2	1	7	5	2	5	6	6	1	2	3
CCT5	4	2	0	4	11	3	4	3	2	7	7	6	1	2	2	6	4	10	2	2	2	5	6	8	1	1	0	3	7	12	4	0	5	1	0	0	3	1	5	2	7	5	4	4	4	3	1	1	4
CCT6A	3	0	0	4	4	4	7	5	7	9	10	4	2	3	2	4	5	3	0	2	2	7	4	5	2	3	2	2	6	4	1	0	6	1	1	1	4	4	3	0	6	4	4	7	7	2	1	0	4
CCT7	1	0	0	5	3	1	3	3	4	3	7	4	7	3	3	2	4	4	1	2	2	4	6	5	1	4	1	2	3	3	1	1	1	0	0	0	2	1	1	0	4	3	2	3	4	1	0	1	0
CD151	1	0	0	0	0	0	0	1	0	0	0	0	1	0	0	0	0	0	2	1	1	1	0	1	1	0	2	0	0	0	0	1	1	1	1	2	1	1	1	1	3	1	1	1	1	1	0	0	1
CD276	1	0	0	1	0	0	0	0	0	0	0	0	2	0	0	1	1	1	0	1	1	0	0	1	0	0	1	1	0	1	0	0	3	1	4	3	0	2	0	0	1	2	0	0	0	0	0	0	0
CD320	1	0	1	0	0	0	0	0	0	0	0	0	0	1	0	0	1	0	0	0	0	0	2	2	0	0	0	0	0	0	0	0	2	0	0	0	0	0	0	0	3	1	0	0	0	2	1	1	3
CD47	3	8	3	0	0	2	2	1	1	0	1	1	1	0	3	0	2	2	2	2	3	1	1	2	1	1	3	0	1	0	1	1	3	3	2	1	1	2	0	2	2	2	2	1	1	2	1	1	2
CD63	1	4	2	1	1	0	2	1	1	1	1	1	0	0	0	0	1	0	2	1	0	1	1	2	1	0	2	0	0	0	2	1	2	2	0	1	1	1	2	1	1	1	1	1	1	1	0	1	1
CD81	6	11	10	5	4	7	5	7	4	6	4	7	5	6	7	5	7	7	13	9	9	5	5	9	4	3	6	7	7	6	5	6	11	15	17	19	7	11	8	7	18	11	11	9	8	8	7	6	6
CD9	4	4	5	1	0	0	2	1	0	1	2	2	1	1	0	1	3	2	2	2	2	3	1	1	2	2	2	2	2	2	1	1	3	8	5	7	1	2	2	2	4	2	2	1	2	4	1	3	2
CD99	1	1	2	3	1	0	3	3	3	3	3	3	3	2	2	1	3	3	3	2	2	3	1	3	1	1	2	0	0	3	3	2	2	1	2	2	1	2	3	2	2	3	1	2	4	0	1	3	3
CDC42	1	2	1	6	3	2	4	6	6	5	3	4	7	5	11	2	4	4	4	2	2	5	4	5	1	0	4	2	7	7	1	3	6	6	4	3	3	3	4	1	8	4	3	4	3	2	1	0	1
CDK1	1	0	0	4	1	1	0	1	3	3	5	3	6	5	23	2	2	1	0	2	0	4	6	6	4	2	1	1	2	4	0	0	2	2	1	1	4	2	0	7	10	9	9	7	5	1	1	1	0
CEP55	4	0	2	17	3	0	3	7	0	1	1	10	22	10	8	10	12	14	10	13	14	3	3	4	0	0	4	10	11	16	5	2	12	16	13	11	4	6	6	2	17	18	8	5	5	6	2	3	9
CFL1	16	6	4	6	4	5	5	11	6	6	7	11	11	9	9	2	8	7	4	4	4	2	6	3	3	2	3	4	9	8	5	3	9	11	11	10	4	4	4	5	11	7	5	3	4	3	5	5	5
CFL2	1	0	0	0	0	0	0	0	0	0	0	0	0	0	0	0	0	0	0	0	0	0	0	0	0	0	0	0	1	0	0	0	0	0	0	0	0	0	0	0	1	0	0	0	0	0	0	0	0
CHMP1A	1	0	0	1	0	2	1	3	1	1	0	2	5	2	0	1	5	4	6	3	2	2	6	5	1	2	4	0	3	5	1	3	3	7	4	5	4	5	4	3	3	4	4	2	4	3	5	4	4
CHMP4B	7	3	2	4	0	2	3	6	5	1	3	7	14	7	7	7	7	8	8	6	10	11	11	7	3	3	6	6	8	6	5	3	10	12	15	12	9	12	8	5	6	10	8	6	7	10	8	8	11
CKB	6	0	2	7	7	2	6	4	7	11	7	9	4	7	7	2	8	6	1	5	3	3	5	5	0	1	3	3	5	7	1	2	8	1	2	1	5	3	2	2	7	6	3	5	2	5	4	4	7
CLIC1	3	0	0	3	1	2	2	5	2	4	3	2	2	4	4	1	2	2	0	3	1	1	3	2	2	1	2	2	2	4	3	1	2	1	2	1	4	2	2	1	4	3	3	2	1	2	2	1	2
CLIC4	1	0	0	0	0	0	1	5	1	2	0	1	2	3	5	0	3	2	0	0	0	0	0	0	0	0	0	0	1	0	0	0	2	1	3	3	0	0	0	0	2	1	0	1	1	0	0	0	0
CLNS1A	1	0	0	1	1	1	0	0	2	4	7	1	0	0	0	3	2	2	0	0	0	0	1	0	0	0	0	1	3	3	0	0	1	0	0	0	0	0	0	0	1	0	0	0	0	1	0	0	0
CLTC	6	0	20	15	16	4	13	13	13	20	20	17	1	3	3	4	18	13	7	10	7	14	8	12	0	3	5	5	8	13	1	1	18	5	4	3	2	11	10	4	6	7	5	12	17	20	18	16	24
CNP	11	29	19	9	2	14	20	18	12	8	2	9	26	18	30	9	22	21	14	13	15	22	18	11	10	13	21	11	17	15	9	10	29	23	28	24	9	18	12	12	22	25	23	12	10	22	14	19	18
COL18A1	5	0	6	0	0	0	0	0	0	0	0	0	8	6	6	0	0	0	0	0	0	0	0	0	0	0	0	0	0	0	0	0	0	13	2	5	0	0	0	0	0	0	0	0	0	0	0	0	0
COLGALT1	2	0	2	0	0	0	1	0	3	2	3	0	0	0	0	0	2	2	3	0	1	1	0	0	7	3	3	1	1	1	2	6	1	0	0	1	2	0	2	1	0	1	3	2	2	1	1	0	1
COPA	2	2	0	4	3	1	3	4	14	14	17	6	1	1	1	9	7	13	5	0	1	10	9	13	5	1	2	6	16	9	4	2	9	0	0	0	18	4	10	7	12	14	6	14	10	2	0	0	0
COPG2	1	0	0	1	0	0	0	2	1	2	0	0	0	0	0	0	1	2	1	0	0	1	0	0	0	0	0	0	0	0	0	1	0	0	0	0	0	0	0	0	0	0	0	0	2	0	0	0	0
CORO1A	1	0	0	1	0	2	0	1	2	1	2	1	1	1	1	0	1	1	0	1	1	0	1	1	0	1	1	1	1	1	0	1	1	0	0	0	1	0	1	1	0	1	0	1	0	1	0	0	1
CPB2	1	0	0	0	0	0	1	0	0	0	0	0	0	0	0	0	0	1	1	0	1	0	0	0	1	1	1	0	0	0	1	1	0	1	1	1	1	0	0	0	0	0	1	0	0	1	0	1	0
CPNE3	3	0	2	3	1	5	3	3	4	4	3	11	2	6	11	0	5	4	5	3	3	2	3	2	0	0	2	0	6	6	3	1	9	5	0	0	3	0	1	0	7	6	0	1	0	3	3	2	3
CPNE8	7	0	8	11	10	6	14	14	9	10	9	19	10	11	11	11	15	14	17	13	15	6	9	4	2	1	6	9	14	10	6	6	13	8	4	6	4	9	4	7	13	13	9	8	6	12	9	11	10
CSTA	1	0	0	0	0	0	0	0	0	0	0	0	0	0	0	0	0	0	0	0	0	0	0	0	0	0	0	0	0	0	0	0	0	0	0	0	0	0	0	0	0	0	0	0	0	0	0	0	0
CTSD	3	0	0	0	0	0	0	0	0	0	0	0	0	0	0	0	0	0	0	0	0	0	0	1	0	0	0	0	0	0	0	0	0	0	0	0	0	0	0	0	0	0	0	0	0	0	0	0	0
CXADR	2	0	0	5	2	1	3	7	2	1	1	7	8	4	6	1	3	5	7	6	6	8	8	6	2	1	3	2	3	3	3	0	9	7	7	6	5	8	6	1	11	8	3	4	3	6	5	5	4
CYSTM1	1	0	1	0	1	0	1	0	0	0	0	0	0	0	0	1	0	0	2	1	1	0	1	0	1	1	0	1	0	0	0	0	1	1	0	0	1	0	1	1	1	0	0	1	1	0	1	1	1
DCD	2	0	1	0	1	0	1	1	1	1	1	2	1	1	0	0	1	1	1	0	0	1	1	2	1	1	1	0	1	1	0	0	1	0	0	1	1	1	0	1	1	1	1	1	0	2	1	0	1
DDX21	1	0	0	0	3	0	0	0	3	2	3	1	2	2	0	2	0	4	0	0	0	4	4	4	0	0	0	0	0	2	0	0	0	0	0	0	1	1	0	0	1	0	1	2	0	0	0	0	0
DDX3X	3	2	0	8	4	3	10	8	6	7	9	9	7	7	1	6	6	7	3	3	2	6	7	7	3	1	3	8	10	12	4	1	10	5	4	2	5	2	4	0	8	6	5	7	6	5	1	4	3
DHX9	10	1	0	17	12	4	4	14	25	31	26	22	3	6	5	11	21	29	15	4	2	30	20	19	12	4	7	16	23	30	17	7	12	2	0	0	19	12	13	11	12	17	20	25	18	5	1	2	2
DNAH2	1	0	0	0	0	0	0	0	0	0	0	0	0	0	0	0	0	0	0	0	0	0	0	0	0	0	0	0	0	0	0	0	0	0	0	0	0	0	0	0	0	0	0	0	0	0	0	0	0
DNAJA1	4	1	4	9	4	3	6	16	8	7	11	8	22	13	7	8	15	12	16	17	15	12	14	9	5	6	7	6	5	5	9	4	13	20	13	7	9	11	10	10	17	19	16	13	9	13	9	11	11
DNAJA2	1	0	3	3	2	1	4	5	3	3	4	3	4	4	0	1	10	7	3	12	13	9	3	6	3	3	4	2	5	6	5	4	9	4	3	4	3	5	5	5	9	9	6	3	4	2	1	5	4
DNM1	1	0	0	0	0	0	0	0	0	1	0	0	0	0	0	0	0	0	0	0	0	0	0	1	0	0	0	0	0	0	0	0	0	0	0	0	1	0	0	0	0	0	0	0	0	0	0	0	0
DNM2	17	0	0	1	0	0	0	0	2	1	1	2	0	1	1	1	1	3	0	0	0	3	2	1	0	0	0	0	2	1	0	0	0	0	0	0	0	0	1	0	1	0	0	1	1	0	0	0	0
DNM3	1	0	0	0	0	0	0	0	0	0	0	0	0	0	0	0	0	0	0	0	0	0	0	0	0	0	0	0	0	0	0	0	0	0	0	0	0	0	0	0	0	0	0	0	0	0	0	0	0
DSG1	1	0	0	1	0	0	2	0	0	0	0	0	0	0	0	0	0	0	0	0	0	0	0	0	0	0	0	0	0	0	0	0	1	0	0	0	0	0	1	0	3	0	0	0	2	0	0	0	0
DSP	5	0	0	2	0	0	8	0	0	0	0	0	0	0	0	0	0	0	0	0	0	0	0	0	0	0	0	0	0	0	0	0	3	0	0	0	0	0	1	0	36	2	0	2	1	0	0	0	0
DSTN	4	0	0	0	0	0	0	0	0	2	0	0	0	0	0	0	0	2	0	0	1	0	0	0	0	0	0	0	1	1	0	0	2	0	0	0	0	0	0	0	1	1	0	1	0	0	0	0	1
DYNC1H1	10	1	0	49	40	6	20	34	70	79	80	56	1	3	1	42	59	84	18	7	6	75	61	78	23	20	13	38	57	51	26	24	54	4	1	1	55	35	63	22	59	57	54	91	89	11	6	7	7
DYNC1LI1	1	0	0	2	2	1	1	1	2	6	5	3	0	1	1	3	2	4	0	0	0	4	0	6	1	0	0	3	3	1	2	1	3	1	0	0	1	4	3	1	3	4	5	5	4	1	0	0	1
EDIL3	5	1	17	4	4	4	11	11	5	6	1	13	15	12	13	9	15	11	6	10	11	11	9	9	1	5	6	4	8	3	3	7	15	18	19	17	4	11	11	1	9	6	3	8	6	13	13	13	12
EEF1A1	15	12	7	8	5	4	13	7	15	6	7	5	7	4	3	8	16	15	8	9	7	10	5	5	9	6	7	9	13	6	8	8	12	6	8	8	17	9	10	10	14	6	15	8	8	11	7	8	11
EEF1G	5	4	0	6	4	2	2	5	9	9	11	4	3	2	2	7	5	8	4	0	0	9	12	10	4	3	4	6	10	12	4	3	3	3	1	0	8	8	6	6	10	8	10	8	8	3	5	1	1
EEF2	18	2	3	18	14	11	14	16	15	21	21	15	7	8	9	13	22	22	11	9	10	24	18	18	16	15	9	14	21	35	17	8	16	14	7	7	23	21	13	9	26	16	19	23	17	10	6	7	8
EHD1	3	0	0	9	1	3	3	7	11	15	7	8	20	19	20	1	9	7	2	1	5	2	0	3	0	0	4	2	3	7	4	1	9	2	0	0	4	0	3	4	3	4	5	6	4	5	2	6	4
EHD4	3	0	0	4	0	0	7	6	4	5	6	10	11	14	14	4	4	4	3	3	0	3	3	5	1	0	0	3	3	4	3	0	4	1	0	0	0	0	0	3	5	4	3	4	1	4	1	2	3
EIF3A	4	0	0	11	12	3	2	5	16	27	22	15	0	1	0	14	14	17	2	2	4	14	10	13	1	0	0	10	10	17	7	7	5	9	0	1	16	9	9	3	7	11	5	8	11	1	0	1	3
EIF3CL	3	0	2	2	2	0	0	0	2	7	7	2	0	0	2	6	1	2	0	0	0	5	1	0	0	0	0	4	3	4	0	0	1	3	0	1	2	0	1	0	0	0	0	2	1	1	0	0	1
EIF3E	2	0	0	2	3	0	1	3	3	5	8	2	0	0	0	1	4	3	0	1	0	2	2	4	0	0	0	1	3	6	0	0	0	0	0	1	2	1	1	0	3	5	1	1	1	0	0	0	1
EIF3F	3	1	0	3	1	0	0	0	2	2	6	1	0	0	0	1	1	3	0	1	1	1	0	4	1	1	0	3	2	3	0	0	0	3	0	0	1	2	2	0	0	2	2	1	1	0	0	0	0
EIF3H	1	1	0	1	1	0	0	0	1	2	1	1	2	1	1	1	0	0	0	1	1	1	1	1	0	1	0	0	1	1	0	0	0	2	0	0	0	1	1	0	1	1	0	1	1	0	0	0	0
EIF3I	1	0	0	2	1	3	0	4	3	6	5	3	1	1	1	3	2	2	0	0	1	6	2	6	2	0	2	3	4	7	2	1	0	0	0	0	6	4	2	5	3	4	2	2	3	1	3	0	1
EIF3L	1	1	0	2	3	0	2	2	3	6	6	2	0	0	0	5	2	2	0	0	0	7	3	5	0	0	0	1	4	5	0	0	0	2	1	0	2	0	4	0	4	2	1	5	4	0	0	0	0
EIF4A1	5	1	0	4	3	4	4	9	6	7	11	5	5	4	6	5	8	5	3	3	1	9	8	5	3	3	3	2	6	5	5	0	5	3	1	2	5	3	5	3	5	4	2	6	6	5	3	3	3
EIF4A3	5	2	0	5	5	5	2	5	11	12	11	8	3	5	3	8	9	9	1	0	0	8	7	7	4	4	0	7	10	10	3	3	5	2	0	0	10	6	5	6	4	6	8	6	5	3	0	1	2
EIF5A	2	2	1	1	3	5	6	4	1	2	3	1	5	4	5	1	5	3	1	1	2	4	4	2	1	0	2	4	1	1	0	0	4	1	1	1	0	0	1	1	4	6	3	3	2	2	3	4	3
ENO1	13	3	5	9	6	18	13	12	8	10	7	11	10	12	17	7	10	7	4	6	4	4	10	9	1	1	6	4	8	8	2	1	8	5	5	4	4	7	13	3	9	8	8	9	10	9	13	5	11
EPB41L2	1	3	0	1	1	0	0	4	3	4	2	9	14	14	22	1	3	4	0	0	1	1	1	0	0	0	1	0	0	3	0	0	2	0	0	0	0	1	0	0	0	2	0	0	0	0	0	0	0
EPHX2	1	0	0	2	1	0	0	0	1	1	0	1	0	0	0	0	0	1	0	0	0	0	0	0	0	0	1	0	0	0	0	0	0	0	0	0	1	0	0	0	0	0	0	1	1	1	0	0	0
EPRS	3	3	0	9	16	2	1	7	14	20	21	16	0	1	0	14	11	22	6	2	1	18	18	24	7	7	3	5	14	12	5	4	13	1	0	0	13	10	13	7	18	9	12	14	14	2	0	2	3
ERH	2	0	0	1	0	0	0	0	1	1	2	0	0	1	0	0	0	0	1	0	0	2	0	0	0	0	0	0	0	0	0	0	0	0	0	0	0	0	0	0	0	0	0	0	0	0	5	0	0
EYS	1	0	1	0	0	0	0	0	0	0	0	0	0	0	0	0	0	0	0	0	0	0	0	0	0	0	0	0	0	0	0	0	0	0	0	0	0	0	0	0	0	0	0	0	0	0	0	0	0
EZR	16	2	3	6	4	7	6	11	10	12	13	15	23	18	23	4	16	8	4	7	6	7	5	9	2	1	0	3	6	15	4	0	19	23	14	15	4	5	6	0	16	14	6	5	3	5	7	9	7
F13A1	2	4	2	3	2	1	3	1	2	1	1	2	1	0	0	1	1	2	2	1	1	3	2	2	3	2	2	1	2	0	1	1	2	3	1	2	1	3	2	3	2	0	3	1	2	2	0	1	1
F2	6	1	2	0	0	2	1	1	1	1	0	1	1	1	0	1	2	4	0	1	1	1	1	1	1	1	1	0	2	2	2	3	1	6	4	6	2	1	1	0	4	1	0	0	0	1	1	1	0
F5	8	1	6	6	3	3	4	10	6	6	6	8	6	3	5	4	8	9	7	8	9	8	6	8	6	6	6	3	9	10	6	6	7	8	6	3	7	8	5	7	5	6	7	9	7	10	7	7	8
FABP5	3	0	1	0	0	0	1	0	0	0	0	0	0	1	0	0	0	0	0	0	0	0	0	0	0	0	0	0	0	0	0	0	0	2	0	0	0	0	0	0	3	0	0	0	0	0	1	0	0
FARSA	1	1	0	4	3	1	1	3	4	6	7	5	1	6	1	4	3	5	1	1	0	6	7	8	5	3	0	5	4	8	3	4	4	0	1	0	5	2	4	5	6	5	7	8	6	3	2	4	3
FASN	27	1	0	35	35	11	21	29	39	39	39	50	12	15	11	30	35	49	27	12	9	51	33	39	19	7	14	28	41	42	24	24	37	10	3	6	42	34	35	19	39	38	37	40	38	19	5	7	12
FBLN1	3	0	4	2	1	2	2	2	1	3	2	2	1	2	2	2	4	3	2	3	4	2	3	1	3	2	3	1	4	1	1	4	1	3	0	1	2	2	2	2	2	2	3	2	1	2	1	2	1
FEN1	1	1	1	0	0	0	0	0	0	0	0	0	0	0	0	0	0	0	0	0	0	0	1	0	0	0	0	0	0	0	0	0	0	0	0	0	0	0	0	0	0	0	0	0	0	0	0	0	0
FLG	3	0	0	8	0	0	0	0	0	0	0	0	0	0	0	0	0	0	0	0	0	0	0	0	0	0	0	0	0	0	0	0	0	0	0	0	0	0	0	0	0	0	0	0	0	0	0	0	0
FLG2	2	0	0	2	0	0	1	0	0	0	0	0	0	0	0	0	0	0	0	0	0	0	0	0	0	0	0	0	0	1	0	0	1	0	0	0	0	0	2	0	0	0	0	2	1	0	0	0	0
FLNA	3	5	2	28	3	10	5	17	9	12	7	10	1	2	3	2	13	15	0	8	7	6	6	5	6	7	7	5	17	9	2	0	0	0	0	0	3	4	8	1	7	3	5	10	10	3	1	0	4
FN1	2	0	2	4	3	2	0	3	3	1	3	0	0	1	1	3	4	5	2	1	1	3	1	1	3	1	0	0	4	3	0	1	0	1	0	1	1	0	0	0	0	0	0	2	2	1	1	0	2
GALK1	1	1	1	2	0	1	1	1	2	2	3	1	1	0	0	0	1	3	1	1	1	2	3	4	1	1	1	2	1	3	1	1	2	2	0	0	2	1	2	2	2	2	1	3	1	0	0	0	0
GAPDH	16	4	8	10	11	16	14	16	14	12	18	18	9	12	7	17	14	16	7	5	6	12	13	12	8	7	8	12	24	32	7	8	11	8	7	6	13	11	7	6	11	8	10	10	8	7	4	7	8
GART	2	0	0	1	4	1	1	1	2	5	2	1	0	1	0	2	3	6	0	1	1	6	2	8	1	0	1	3	1	5	0	1	2	0	0	0	5	1	4	0	3	4	3	5	4	0	0	0	1
GCN1	1	0	0	5	2	0	0	1	7	22	19	2	0	0	0	2	1	5	1	0	0	13	8	12	5	1	0	2	1	5	1	0	2	0	0	0	6	4	3	4	10	12	10	14	11	0	0	0	0
GDI2	3	0	0	4	1	1	5	10	3	3	5	5	7	5	4	0	5	1	0	4	4	5	2	4	0	0	2	2	4	4	0	0	9	3	2	2	0	2	0	1	13	9	8	5	3	6	1	7	5
GLO1	1	0	0	0	1	0	0	0	0	0	0	0	2	1	1	0	0	0	0	0	0	0	0	0	0	0	0	0	0	0	0	0	0	0	0	0	0	0	0	0	0	1	0	0	0	1	0	1	1
GNAI2	1	1	0	0	0	0	0	3	1	4	1	3	2	2	2	0	2	1	0	0	0	2	2	1	0	0	1	0	0	1	0	0	1	0	0	0	0	1	2	0	1	1	0	1	0	0	0	2	2
GNAI3	1	0	0	1	1	1	0	5	1	3	1	3	2	2	1	1	4	3	1	1	1	2	1	1	0	0	1	1	1	2	0	0	2	3	2	2	3	3	2	1	3	2	0	0	0	2	0	0	0
GNAS	3	1	1	2	1	1	1	4	2	4	5	2	2	4	1	2	1	1	1	4	3	5	2	4	0	0	2	0	1	2	0	0	3	2	1	0	1	2	1	1	3	2	2	2	1	4	1	3	3
GNB1	3	2	2	3	1	0	3	5	3	2	4	0	2	0	0	0	3	2	2	1	2	3	3	2	2	1	1	1	3	1	2	0	2	3	3	3	2	2	2	1	5	2	2	2	1	3	0	2	5
GNB2	1	1	1	0	0	0	1	0	1	1	1	0	2	0	0	0	1	0	1	0	0	1	0	1	0	0	0	0	1	1	1	1	1	2	1	0	1	1	1	1	1	0	1	0	1	2	1	1	1
GNG12	2	2	1	2	1	0	1	2	2	2	1	2	3	2	2	0	2	2	2	1	1	2	2	1	0	0	1	0	1	2	2	0	2	2	2	1	2	0	2	1	1	0	0	0	0	1	1	0	1
GNG5	1	1	0	0	0	0	0	1	2	1	3	2	3	2	2	0	1	1	1	1	1	0	1	0	1	1	1	0	0	1	1	0	0	2	1	1	0	1	1	0	0	1	1	1	0	1	1	0	0
GOLM1	3	3	0	5	0	2	1	8	2	2	3	6	12	12	12	2	6	4	6	7	8	2	8	7	1	0	6	3	2	5	4	1	1	6	2	2	3	1	1	3	1	3	0	1	0	2	1	1	1
GPX3	1	0	0	1	1	0	0	1	0	0	0	1	0	0	0	1	1	1	2	1	0	1	2	0	1	0	0	1	1	0	1	0	1	1	1	1	1	1	1	1	1	1	1	1	1	0	2	0	0
GRB2	1	0	0	4	0	0	0	1	0	0	0	0	16	1	3	0	1	1	1	0	0	0	1	1	0	0	0	0	0	0	0	0	1	0	1	0	0	0	0	0	1	4	0	1	1	0	0	3	1
GSN	1	0	0	3	1	1	1	1	2	3	2	2	2	0	1	2	0	1	0	2	1	3	5	1	3	5	1	0	1	2	0	1	0	0	0	0	0	1	0	0	5	0	0	1	0	0	0	0	0
HBA1	19	25	23	4	2	25	7	20	12	14	16	19	7	8	11	9	14	14	12	13	12	9	11	7	10	14	9	9	17	38	11	13	8	18	17	17	13	14	7	10	7	6	16	5	7	8	6	9	8
HBD	7	8	5	1	1	11	2	4	5	2	5	6	2	1	2	5	5	3	3	6	5	1	4	2	9	4	8	2	16	13	7	3	2	4	4	4	8	13	2	6	1	2	17	4	3	1	1	1	0
HIST1H1E	1	0	1	1	0	0	0	0	2	3	1	1	1	2	0	0	1	1	0	0	0	1	1	0	0	0	0	1	0	1	0	0	0	1	0	0	0	0	0	0	0	0	0	0	0	0	0	0	0
HIST1H2AB	4	2	1	2	2	3	3	1	2	3	3	4	3	2	3	2	4	3	3	3	2	2	2	2	2	2	2	4	2	3	0	2	4	4	2	3	1	2	3	1	1	1	2	3	2	3	0	2	1
HIST1H2BK	5	8	1	4	4	3	5	2	3	5	5	4	6	6	4	6	9	4	2	3	1	2	4	4	2	2	3	3	5	8	2	1	3	8	4	4	3	2	2	3	4	1	1	1	2	5	4	2	6
HIST1H3A	1	0	0	1	1	0	0	1	1	0	0	1	1	0	0	1	0	0	0	0	0	0	0	1	0	0	0	1	0	1	0	0	0	0	0	0	0	0	0	0	0	0	0	0	0	1	1	0	1
HIST1H4A	4	3	0	2	2	2	2	3	2	3	3	2	4	4	4	3	4	3	0	2	2	1	2	3	1	1	1	3	2	2	2	1	2	6	1	4	2	0	1	2	1	2	0	1	1	5	3	1	3
HLA-A	2	1	1	3	5	5	1	4	1	2	1	7	4	3	6	4	3	4	3	6	5	6	7	3	3	3	2	2	5	4	4	4	4	3	4	2	5	1	3	5	5	3	2	4	3	3	3	5	3
HMGB1P1	2	0	0	0	0	0	0	0	0	0	0	0	0	0	0	0	0	0	0	0	0	0	0	0	0	0	0	0	0	0	0	0	0	0	0	0	0	0	0	0	0	0	0	0	0	0	0	0	0
HMGCS2	1	0	0	0	0	0	0	0	0	0	0	0	0	0	0	0	0	0	0	0	0	0	0	0	0	0	0	0	0	0	0	0	0	0	0	0	0	0	0	0	0	0	0	0	0	0	0	0	0
HNRNPA1	1	0	1	0	0	0	0	0	0	3	4	0	2	2	1	0	0	0	0	0	0	0	0	0	0	1	1	0	0	0	0	0	0	0	0	0	0	0	1	0	0	0	0	0	0	0	1	1	0
HNRNPC	4	0	4	2	0	0	0	0	3	4	1	1	1	0	1	0	2	0	0	0	0	0	0	0	0	0	0	0	0	2	0	0	0	2	1	0	0	0	0	0	0	0	0	0	1	0	0	0	0
HNRNPH1	2	0	0	2	2	2	0	2	3	5	4	3	1	2	2	5	4	5	1	0	0	2	5	3	1	1	0	0	5	6	1	0	2	0	0	0	3	2	2	1	2	0	2	1	1	0	1	0	0
HNRNPK	5	5	0	6	7	3	0	4	8	13	13	9	6	10	4	6	10	11	2	2	3	10	5	10	3	1	3	7	3	10	3	2	3	1	1	0	5	5	3	3	6	4	3	4	4	2	1	0	5
HNRNPM	3	0	0	8	7	2	1	3	7	17	17	9	7	6	3	11	6	13	1	0	1	4	5	7	5	2	0	3	9	12	4	1	0	1	0	0	7	1	2	4	10	4	1	5	1	0	0	1	2
HNRNPU	3	0	1	4	4	1	2	1	2	5	4	3	3	2	1	4	3	2	1	0	0	7	4	3	1	0	0	3	2	1	0	2	1	8	0	0	2	1	2	1	3	1	0	1	2	2	3	1	1
HRNR	2	0	0	15	0	0	1	0	0	0	0	0	0	0	0	2	0	0	0	0	0	0	0	0	0	0	0	0	0	4	0	0	6	0	0	0	0	0	21	0	0	2	0	14	20	0	0	2	0
HSP90AA1	15	34	17	18	16	31	30	33	20	19	19	20	20	26	16	19	22	20	13	11	12	21	23	21	16	12	18	10	19	18	13	9	21	14	11	11	16	20	12	13	16	15	18	16	16	16	21	14	14
HSP90AB1	12	10	12	17	8	24	22	22	19	18	13	12	20	26	15	15	12	17	7	12	10	14	19	19	10	12	13	10	16	13	6	10	14	9	4	6	12	17	9	8	11	11	18	11	9	15	18	10	15
HSPA1A	25	92	40	20	15	57	16	61	20	25	22	21	53	59	55	26	35	30	35	31	28	38	37	41	20	19	37	10	35	41	22	20	36	58	65	58	19	52	22	24	50	51	77	34	26	30	40	26	27
HSPA5	4	0	0	5	3	7	4	6	4	9	5	8	5	4	3	3	2	3	0	0	0	5	0	0	0	0	0	0	4	4	0	0	4	0	0	0	0	0	10	0	8	0	0	7	7	6	15	6	4
HSPA8	31	108	49	30	17	88	41	71	20	22	18	25	69	69	57	39	37	35	50	39	38	25	51	39	32	35	39	29	55	52	31	27	40	79	84	78	29	59	38	33	51	63	85	53	40	36	45	26	26
HSPB1	3	1	1	1	0	1	0	0	2	1	2	1	1	1	1	0	0	0	1	0	0	0	6	2	1	1	1	0	1	1	0	0	2	0	0	0	1	0	1	2	7	7	6	2	3	5	1	4	3
IGF2BP1	1	12	3	9	5	6	10	10	8	12	10	7	9	8	7	8	7	10	8	1	1	10	12	10	10	2	9	7	11	8	8	4	4	6	4	1	6	6	6	9	5	6	7	6	6	6	2	8	9
IGLL5	1	0	2	0	0	0	1	2	0	1	1	1	1	0	0	0	1	1	0	1	1	0	0	0	1	0	1	0	1	0	0	1	0	0	0	0	0	0	0	0	4	0	0	0	0	0	1	0	1
IGSF8	9	4	20	8	6	9	15	8	5	6	3	10	13	16	18	8	14	11	17	22	18	13	8	8	7	9	14	4	11	9	10	11	14	14	20	16	10	12	6	7	12	10	11	10	10	8	9	11	10
ILK	1	2	1	6	1	2	2	7	5	7	3	2	1	2	2	1	7	8	0	2	4	2	2	3	3	2	2	0	5	3	1	0	2	0	0	0	4	4	4	3	8	6	5	5	6	5	2	1	1
IMPDH2	3	5	0	10	6	5	2	3	7	9	14	11	0	2	2	9	6	6	4	0	0	6	5	3	0	0	0	5	9	16	2	0	6	1	1	0	7	1	2	4	6	5	1	4	1	4	2	0	1
IPO4	1	0	0	0	1	0	0	1	1	0	3	0	0	0	0	0	0	0	0	0	0	2	0	0	0	0	0	0	1	0	0	0	0	0	0	0	0	0	0	0	1	0	0	0	0	0	0	0	0
IRS4	5	2	1	11	6	1	8	15	4	10	6	11	26	23	20	11	17	11	13	16	14	8	10	9	5	1	6	6	8	11	12	2	12	6	6	5	8	4	4	5	10	8	5	4	4	8	5	11	11
IST1	4	2	4	5	1	6	6	7	2	5	4	3	9	5	6	3	9	10	7	9	7	11	9	8	8	10	15	2	6	9	7	2	10	13	11	11	6	15	6	7	7	6	12	6	5	11	9	11	12
ITGB1	5	0	3	3	1	2	3	6	3	1	2	4	9	4	7	5	7	7	4	5	5	4	8	5	1	2	3	5	6	3	5	3	7	6	9	11	3	8	6	4	3	4	6	2	1	7	6	8	6
ITIH2	4	2	3	6	3	2	6	5	6	4	8	7	3	4	1	5	7	8	4	4	3	3	6	4	8	6	9	5	4	5	2	6	4	5	3	3	3	4	4	4	5	4	5	6	6	3	2	4	2
ITIH3	1	1	0	2	0	0	1	0	1	1	1	0	0	0	1	2	1	3	2	0	0	1	2	0	2	1	2	1	0	0	0	1	1	1	0	0	1	0	0	0	0	0	0	1	1	1	0	0	0
JUP	6	0	0	6	0	0	4	2	0	2	2	6	2	2	1	0	3	1	1	1	1	0	0	0	0	0	0	0	1	2	1	0	6	0	1	1	0	0	3	0	10	3	0	3	4	0	1	0	2
KBTBD3	1	0	0	0	0	0	0	0	0	0	0	0	0	0	0	0	0	0	0	0	0	0	0	0	0	0	0	0	0	0	0	0	0	0	0	0	0	0	0	0	0	0	0	0	0	0	0	0	0
KIF23	2	0	2	1	3	0	2	3	0	3	1	6	6	8	7	0	1	2	2	1	1	0	0	0	0	0	0	0	0	1	0	0	2	0	0	0	0	0	0	0	0	0	0	0	0	2	0	0	0
KPNA2	1	0	0	1	0	1	2	6	1	3	3	2	5	4	2	2	1	2	0	1	0	3	2	2	0	0	0	1	1	2	1	0	1	0	0	0	1	1	0	0	1	4	1	1	1	0	0	0	0
KPNB1	3	0	1	5	5	3	5	10	4	8	8	3	1	2	3	1	1	5	1	3	3	5	2	4	2	1	2	1	2	4	0	0	4	2	0	2	2	3	3	1	5	6	2	5	3	2	3	1	0
KRT1	60	37	17	38	17	26	45	9	18	10	18	19	2	17	4	20	19	12	13	0	16	20	19	19	1	5	2	8	17	39	2	4	43	23	42	27	6	10	39	4	32	23	6	38	53	9	22	28	20
KRT10	52	31	10	35	9	14	28	3	7	2	2	12	0	9	1	7	11	1	8	0	0	15	2	12	0	0	0	5	9	14	3	0	33	20	17	13	2	4	25	5	30	12	3	28	29	13	15	18	16
KRT14	20	1	0	9	3	5	12	0	3	0	0	3	0	8	0	0	4	2	0	0	10	1	1	3	0	0	0	0	0	4	1	2	12	0	13	7	0	1	11	3	22	1	0	14	14	6	5	9	3
KRT16	5	0	0	9	0	0	1	0	0	0	0	0	0	6	0	0	0	1	0	0	9	0	0	0	0	0	0	0	0	2	0	0	4	0	2	0	0	0	7	0	14	0	0	13	13	1	0	2	0
KRT2	19	6	4	27	5	11	23	1	3	3	0	0	0	2	0	5	7	0	2	0	0	7	0	10	0	0	0	2	4	14	0	0	25	4	5	5	0	0	9	1	0	7	0	10	13	9	9	15	10
KRT5	30	0	5	15	0	5	14	0	2	1	1	0	0	2	0	3	3	0	0	0	8	3	2	2	0	0	0	0	3	3	0	0	13	0	4	7	0	0	8	0	17	0	0	11	11	1	4	6	5
KRT6A	6	0	0	2	2	0	0	0	0	0	1	0	0	7	1	0	2	3	0	0	4	0	0	0	0	0	0	0	0	1	0	0	2	0	14	0	0	2	17	0	24	0	0	2	16	2	0	0	0
KRT75	1	0	0	1	0	0	0	0	0	0	0	1	0	0	0	0	0	0	0	0	1	0	0	0	0	0	0	0	0	0	0	0	1	0	0	0	0	0	0	0	0	0	0	0	0	0	0	0	0
KRT78	1	0	0	2	0	0	0	0	0	0	0	0	0	0	0	0	0	0	0	0	0	0	0	0	0	0	0	0	0	0	0	0	0	0	0	0	0	0	0	0	0	0	0	0	1	0	0	0	0
KRT8	1	0	1	0	0	0	8	0	0	0	0	0	0	0	0	0	0	0	1	0	0	0	1	0	0	0	0	0	0	0	0	0	11	0	1	1	0	0	0	0	0	0	0	0	0	0	0	0	0
KRT9	37	36	12	38	15	16	46	4	13	5	10	12	3	17	3	19	13	8	9	0	5	6	15	19	2	5	1	2	9	26	4	4	43	7	31	13	5	13	35	6	6	24	5	34	41	10	27	25	18
LARS	1	1	0	4	8	0	1	4	12	13	16	9	2	3	1	7	8	9	0	0	0	16	16	12	8	2	0	9	15	16	7	3	4	0	0	0	16	9	12	6	11	8	10	13	9	3	0	1	0
LDHA	2	0	0	1	0	0	2	2	0	2	1	3	2	1	4	0	5	4	0	2	3	2	1	1	2	2	2	0	1	1	0	0	5	2	1	0	1	1	0	2	3	2	3	1	1	1	4	0	0
LDHB	5	0	3	2	2	2	7	5	5	6	7	5	3	2	4	0	7	6	3	3	6	4	4	4	4	3	4	4	4	7	2	0	5	3	1	4	1	1	3	1	3	1	5	4	3	3	4	1	5
LGALS7	5	0	0	0	0	0	0	0	0	0	0	0	0	0	0	0	0	0	0	0	0	0	0	0	0	0	0	0	0	0	0	0	0	0	0	0	0	0	0	0	4	0	0	0	0	0	0	0	0
LIMS1	1	1	1	0	0	0	0	1	0	0	0	0	0	0	0	0	0	0	0	1	0	0	0	0	0	1	1	0	0	0	0	0	1	0	0	0	0	0	0	1	2	1	1	0	0	0	0	0	0
LMNA	1	0	0	2	0	2	0	0	0	0	0	0	0	0	0	0	1	0	0	0	0	0	0	0	0	0	0	0	0	0	0	0	0	0	0	0	0	0	0	0	7	2	0	0	0	0	0	0	2
LSR	3	1	1	3	2	2	0	2	1	2	1	5	8	4	6	1	2	1	3	3	2	1	0	3	0	0	1	0	2	2	1	0	4	2	3	2	3	2	2	0	3	2	2	2	2	1	2	4	3
MAPRE2	1	0	0	4	0	1	1	1	4	4	3	1	4	2	1	2	0	1	0	0	1	2	1	3	2	1	1	2	2	2	0	0	1	0	0	0	1	0	1	1	2	2	0	2	2	0	0	0	0
MARCKS	11	18	6	5	7	0	5	9	12	9	9	7	17	14	17	4	8	9	9	8	9	8	8	8	2	1	6	3	8	7	5	3	8	11	5	6	3	3	1	5	8	7	6	3	3	8	1	3	6
MARCKSL1	4	15	1	2	4	2	1	2	2	3	2	3	7	6	5	3	3	3	2	5	2	1	3	3	2	1	3	1	3	3	3	3	3	4	1	1	1	2	2	4	3	1	3	2	2	2	1	2	2
MARS	1	0	0	2	3	0	0	1	6	6	8	5	0	0	0	8	1	5	3	2	1	6	4	7	2	1	0	4	3	10	2	1	3	0	0	0	8	3	3	2	5	2	3	4	1	2	0	0	0
MATR3	1	0	0	10	5	0	1	2	7	14	11	5	3	3	0	5	2	5	2	0	0	11	3	5	4	0	0	2	6	6	1	0	2	0	0	0	7	2	1	1	6	5	5	1	1	0	0	0	0
MCM7	1	1	0	3	2	0	0	1	2	9	9	5	0	0	0	1	2	3	2	0	0	3	4	8	4	0	0	4	4	9	3	0	0	0	0	0	9	1	0	2	1	1	2	2	2	1	0	0	0
MFGE8	10	1	18	12	9	9	12	15	12	7	5	18	14	10	12	14	16	13	12	12	11	11	7	10	4	7	8	1	9	5	6	11	17	17	15	19	5	15	8	1	17	11	9	10	3	14	16	19	10
MIF	1	0	0	1	1	1	1	1	1	1	1	1	1	1	1	0	0	0	0	0	0	0	1	1	0	0	0	0	1	1	0	0	0	1	1	1	0	0	2	0	0	0	0	1	1	1	1	1	1
MPZL1	2	0	0	3	1	0	1	2	1	0	0	0	3	3	4	1	3	3	2	2	3	2	3	2	0	0	2	1	1	2	2	1	4	1	4	3	1	6	3	1	4	2	1	0	0	2	3	5	4
MSN	7	4	2	4	4	5	4	12	7	8	7	13	16	13	20	1	8	5	2	5	6	4	4	5	0	0	5	0	2	5	2	4	12	13	11	9	4	3	4	4	12	12	2	6	7	1	6	7	4
MTHFD1	12	3	0	12	10	10	7	9	21	24	28	17	7	12	7	23	17	22	8	6	4	15	25	20	13	4	6	18	19	25	12	7	12	5	0	2	22	14	18	15	12	15	19	22	20	5	0	2	5
MVB12A	3	1	2	1	2	2	3	3	1	2	1	3	6	5	6	1	3	2	3	5	3	3	2	3	1	1	1	2	3	2	3	2	5	2	4	3	3	3	3	2	8	5	3	3	2	2	1	2	2
MYCBP	1	0	0	0	0	1	0	0	0	2	0	0	0	0	0	0	0	0	0	0	0	0	0	0	0	0	0	0	0	1	0	0	0	0	0	0	0	0	0	0	0	0	0	0	0	0	0	0	0
MYH10	1	2	9	23	26	1	19	34	28	34	25	33	5	8	4	10	38	36	2	14	12	5	6	6	0	0	0	11	32	29	0	0	22	1	1	0	0	0	8	0	5	5	0	2	2	19	25	32	35
MYH9	65	58	101	54	51	27	46	71	53	55	38	48	41	43	42	42	59	61	18	52	51	17	15	24	12	16	18	19	49	34	25	17	56	36	17	16	18	16	27	16	22	17	16	25	25	53	60	70	70
MYL12B	1	0	2	5	1	1	0	0	0	1	2	2	2	0	2	0	2	0	0	1	0	0	0	0	0	0	0	1	2	1	0	0	1	0	0	0	0	0	4	0	0	1	0	2	2	2	3	3	3
MYL6	3	1	8	5	4	5	7	8	5	6	5	7	1	5	5	3	7	4	1	2	3	3	3	3	0	0	0	3	6	5	0	0	4	1	0	0	0	1	2	2	3	3	1	2	1	6	5	3	5
NAP1L1	2	0	0	2	3	0	2	1	2	3	3	2	2	2	1	2	2	2	1	2	2	1	1	1	1	1	3	0	2	2	1	0	2	1	0	0	2	1	2	1	2	2	2	2	2	0	0	1	1
NAPA	1	0	0	1	0	0	1	1	2	4	5	2	2	0	1	0	3	2	0	0	0	0	1	1	0	0	0	1	1	1	0	0	1	0	0	0	1	0	0	0	1	1	2	1	0	2	0	1	1
NCK2	16	0	0	0	0	0	0	0	0	0	0	0	3	0	0	0	0	0	0	0	0	0	0	0	0	0	0	0	0	0	0	0	0	0	0	0	0	0	0	0	0	0	0	0	0	0	0	0	0
NCKIPSD	3	0	0	0	0	0	0	0	0	0	0	0	0	0	0	0	0	0	0	0	0	0	0	0	0	0	0	0	0	0	0	0	0	0	0	0	0	0	0	0	0	0	0	0	0	0	0	0	0
NCL	13	0	13	1	1	1	0	0	0	0	0	0	0	1	1	0	0	0	0	0	0	0	0	1	0	0	0	0	0	0	0	0	0	7	0	0	0	0	3	0	1	0	0	2	1	0	3	0	0
NDRG1	1	0	0	0	0	0	0	0	0	0	0	0	0	0	0	0	0	0	0	1	1	0	0	0	0	0	0	0	0	0	0	0	2	0	0	0	0	1	2	0	2	1	1	0	0	0	0	0	0
NOLC1	4	0	1	0	0	0	0	0	0	0	0	0	4	3	2	0	0	0	0	0	1	0	0	0	0	0	0	0	0	0	0	0	0	7	3	3	0	0	0	0	0	0	0	0	0	0	0	0	0
NONO	3	0	0	10	8	0	0	1	13	9	12	4	5	4	1	10	4	9	2	1	1	7	10	7	6	1	1	3	5	7	2	2	3	0	0	0	10	3	7	7	7	10	6	11	12	1	1	0	1
NPM1	7	1	3	1	0	0	0	0	0	1	0	0	1	1	0	0	1	0	0	0	0	1	0	1	0	0	0	0	0	0	0	0	0	3	0	1	0	0	2	0	0	0	0	1	3	0	1	0	0
NRAS	1	0	0	2	0	1	2	0	1	2	1	0	1	4	3	0	0	3	3	0	1	3	1	3	0	0	1	2	1	2	2	1	5	1	3	1	1	2	2	1	4	2	1	1	1	2	1	3	2
OLA1	1	0	0	2	2	1	1	3	2	2	2	1	1	1	1	1	1	2	1	0	0	1	1	3	0	0	0	0	2	2	0	0	2	0	1	0	1	2	0	0	2	2	1	1	2	2	0	1	2
PABPC1	10	8	4	4	2	0	4	11	1	1	1	0	12	7	13	0	7	4	4	2	2	1	5	6	0	0	2	2	11	7	4	2	11	5	9	6	0	1	2	0	4	3	1	0	0	10	6	12	16
PANX2	1	0	1	0	0	0	0	0	0	0	0	0	0	0	0	0	0	0	0	0	0	0	0	0	0	0	0	0	0	0	0	0	0	1	0	1	0	0	0	0	0	0	0	0	0	0	0	0	0
PARP1	2	0	1	3	3	0	0	0	0	0	1	0	6	11	2	1	0	0	0	0	0	1	0	0	0	0	0	0	1	0	0	0	0	5	0	0	0	0	0	0	0	0	0	0	0	0	1	0	0
PCBP1	2	2	0	0	0	3	4	6	0	1	0	0	2	2	3	0	0	1	2	1	1	1	2	2	0	0	1	0	4	3	2	2	0	0	3	0	2	2	0	0	9	5	1	3	0	3	0	5	6
PCBP2	1	3	0	7	0	2	5	4	2	2	1	0	2	1	1	0	3	2	1	0	0	3	1	3	0	0	0	2	2	3	1	0	4	2	1	1	0	0	2	0	5	5	2	1	1	4	2	3	1
PCLO	1	0	1	0	0	0	0	0	1	1	0	1	0	0	1	0	1	0	0	0	1	1	1	0	2	0	1	0	0	0	0	1	1	0	0	0	0	1	1	0	0	1	1	1	1	0	0	0	0
PDCD6	2	1	3	4	3	4	4	7	7	5	4	7	6	5	8	3	5	6	9	5	5	6	5	3	0	2	5	6	7	5	7	2	5	2	1	0	5	4	2	4	5	3	6	2	1	6	5	7	7
PDCD6IP	55	31	43	25	18	41	32	43	27	26	26	43	61	51	75	39	44	36	45	37	38	29	34	33	13	17	31	35	47	40	33	23	45	79	78	71	29	45	24	20	43	35	42	25	16	43	27	34	41
PEF1	2	1	2	3	4	1	2	2	3	3	2	5	1	3	2	5	2	2	2	1	1	3	3	5	0	0	1	1	3	4	3	1	2	0	1	1	1	2	0	0	0	2	2	2	1	2	3	2	1
PFN1	5	0	1	1	1	2	3	3	4	3	5	5	3	5	5	0	2	3	1	2	3	4	3	3	1	2	3	2	2	2	1	0	4	3	2	2	2	1	1	2	3	3	2	0	2	1	1	2	1
PGAM2	1	1	0	0	1	0	0	0	0	0	0	0	3	2	2	2	0	1	0	1	1	0	0	0	0	0	0	1	0	2	0	0	0	0	0	0	0	0	1	1	2	1	0	3	2	0	1	0	0
PGK1	7	1	3	9	4	4	4	7	6	5	8	9	6	4	2	6	8	10	4	6	5	6	9	4	3	6	5	4	10	6	2	3	5	3	3	0	7	3	5	5	6	6	9	7	6	6	1	4	3
PHGDH	4	3	1	5	5	2	3	5	9	9	11	8	4	5	5	7	6	8	4	3	4	10	8	9	5	4	6	7	6	9	5	5	5	1	0	0	7	7	5	6	8	6	7	7	6	4	0	5	4
PKM	20	19	6	19	16	21	19	16	16	25	23	23	14	15	10	23	24	29	15	13	19	24	26	20	18	14	16	25	21	26	16	15	23	10	6	5	27	26	18	14	26	18	31	20	21	12	5	12	13
PLEK	1	0	1	3	0	0	2	2	3	3	3	0	0	0	0	0	0	2	0	1	1	0	0	0	3	1	1	1	0	0	0	0	0	0	0	0	0	0	1	1	0	0	0	0	1	0	0	0	0
PLS3	9	0	0	0	0	0	1	3	0	0	0	2	2	0	2	0	0	0	0	1	0	0	0	0	0	0	0	0	0	1	0	0	4	1	0	1	0	0	0	0	2	1	0	0	0	0	0	0	0
PNN	1	0	0	0	0	0	0	0	0	2	1	0	0	0	0	0	0	0	0	0	0	1	0	0	0	0	0	0	0	0	0	0	0	0	0	0	0	0	0	0	0	0	0	0	0	0	0	0	0
POF1B	1	0	0	0	0	0	0	0	0	0	0	0	0	0	0	0	0	0	0	0	0	0	0	0	0	0	0	0	0	0	0	0	0	0	0	0	0	0	0	0	1	0	0	0	0	0	0	0	0
POLR3B	1	0	0	0	0	0	0	0	0	0	0	0	0	0	1	0	0	0	0	0	0	0	0	0	0	0	0	0	0	0	0	0	1	1	1	1	0	0	0	0	0	0	0	0	0	0	0	0	0
POSTN	10	0	1	2	1	0	0	1	4	3	3	5	0	0	0	1	0	4	0	0	0	4	2	5	0	0	0	0	3	2	0	0	0	0	0	0	0	1	1	0	0	1	1	1	1	1	0	0	0
POTEF	20	15	6	6	5	10	8	21	6	7	7	7	12	12	18	8	7	9	4	6	7	7	4	6	6	4	7	8	11	12	0	0	0	14	15	14	0	8	0	9	0	0	9	0	0	9	0	6	7
PPIA	10	29	12	8	6	15	7	13	5	2	6	4	21	15	25	7	5	4	10	9	7	6	8	10	6	5	9	6	16	16	9	3	16	22	25	25	6	12	7	6	22	19	21	11	11	9	7	6	7
PPP1CA	3	0	0	0	0	0	0	0	1	1	1	1	0	0	1	1	0	0	2	0	0	1	0	0	0	0	0	1	0	0	0	0	0	0	0	0	0	0	1	0	0	0	3	1	1	0	0	0	0
PRDX1	5	0	0	0	0	0	4	3	1	1	2	2	1	1	0	0	1	1	0	0	1	2	0	1	0	0	0	0	0	2	0	0	2	3	0	0	2	0	2	1	1	2	0	0	0	1	2	2	2
PRDX2	3	0	0	0	1	1	2	2	1	1	0	0	0	1	1	2	0	0	0	0	0	0	1	0	0	0	2	1	1	0	0	0	0	0	1	0	1	0	0	0	2	0	0	2	1	2	0	1	0
PRDX6	3	0	0	0	1	0	1	0	0	0	0	1	0	1	0	0	0	0	0	1	1	1	1	0	0	0	0	1	0	1	0	0	3	0	0	0	0	0	0	0	2	2	0	1	0	1	1	1	1
PRKDC	4	3	0	20	14	1	7	18	43	62	52	40	1	1	0	15	22	35	24	3	3	47	42	52	20	9	5	24	33	38	27	10	21	4	0	1	41	22	39	19	40	32	42	50	49	13	1	7	7
PRMT5	14	31	15	12	9	17	12	13	21	24	26	14	1	2	0	8	26	20	14	20	15	21	16	15	5	3	7	17	27	23	13	12	26	21	12	14	15	17	11	9	21	17	16	10	8	17	13	10	15
PRNP	1	0	1	0	1	0	0	1	0	0	0	2	1	0	1	0	0	1	3	1	1	1	1	2	1	0	1	0	0	0	2	0	2	2	1	0	1	0	2	1	2	2	0	2	2	0	0	2	3
PRPS2	1	0	0	0	0	0	0	0	2	2	3	0	1	0	0	0	1	0	0	0	0	1	0	0	1	0	0	0	0	1	0	0	0	0	0	0	0	1	0	0	0	0	1	1	0	0	0	0	0
PSMC1	2	1	0	6	4	2	1	1	3	7	5	8	2	2	7	8	3	8	2	0	1	6	7	12	4	1	2	5	5	5	2	1	5	1	0	0	5	1	6	5	6	5	3	7	8	11	6	11	11
PSMC2	3	7	0	5	3	4	5	4	7	9	8	11	5	1	5	5	7	6	4	0	0	10	12	9	6	4	5	7	6	9	5	2	5	3	0	1	8	7	5	8	6	4	9	7	8	10	8	10	12
PSMC3	3	0	1	8	9	2	3	7	9	10	11	8	6	5	17	9	6	5	3	5	4	12	13	14	7	3	7	3	9	9	5	3	9	3	1	2	9	9	7	4	11	10	9	10	8	12	9	9	12
PSMC4	1	1	1	12	6	5	2	7	6	7	7	8	3	1	7	8	4	4	2	2	3	7	4	8	4	4	6	3	11	11	7	2	3	4	1	2	6	9	4	4	3	6	8	9	5	4	6	9	9
PSMC5	3	3	0	8	7	2	5	6	8	9	10	5	3	4	4	6	4	6	4	1	2	8	11	12	5	2	3	4	8	6	7	4	6	2	0	1	9	5	5	6	10	10	7	11	8	12	8	12	12
PSMC6	2	1	0	10	3	0	4	6	5	8	7	8	2	2	6	10	7	4	2	2	2	8	4	9	4	3	6	1	6	8	3	2	3	2	0	1	5	2	5	4	5	3	6	6	4	8	7	8	8
PSMD1	1	4	0	6	6	1	2	1	7	6	11	6	2	1	7	6	10	14	2	2	2	9	9	14	7	3	3	2	5	8	3	1	7	2	0	1	8	4	10	4	11	8	7	12	9	13	9	16	12
PSMD11	2	2	0	3	3	1	1	2	5	7	9	5	2	3	8	4	2	5	2	1	0	6	5	4	2	3	2	5	3	6	1	0	4	3	0	0	2	2	4	4	2	5	4	3	4	9	6	12	11
PSMD2	5	2	1	15	14	3	3	7	17	18	16	11	4	3	11	10	7	15	6	3	4	18	10	19	8	6	4	8	12	17	5	2	12	3	1	1	9	11	7	4	13	19	15	9	10	14	15	18	23
PSMD3	1	3	0	9	4	1	3	5	4	9	7	7	5	4	6	5	5	8	6	0	1	8	7	11	3	2	2	5	5	10	4	3	4	2	0	0	3	3	6	4	7	10	4	6	6	12	7	8	10
PSMD7	1	2	0	5	4	1	4	0	5	9	9	3	1	0	1	1	4	3	1	0	0	8	5	3	0	1	0	2	2	3	1	1	4	0	0	0	3	3	1	1	1	6	3	4	1	8	1	9	9
PTBP1	1	0	0	0	0	2	0	2	0	2	0	0	0	1	0	0	0	0	0	0	0	0	0	0	0	0	0	0	0	0	0	0	0	0	0	0	0	0	0	0	0	0	0	0	0	0	0	0	0
PTGES3	2	0	2	1	0	0	2	2	1	2	2	1	2	1	0	0	2	2	0	0	0	2	0	4	0	0	1	0	1	1	1	0	1	0	0	0	1	0	1	1	2	1	0	1	1	1	2	0	1
PTGFRN	21	9	20	18	14	13	18	15	12	12	11	15	24	18	19	20	26	24	25	30	27	23	20	17	7	12	22	13	20	13	18	14	30	24	32	30	17	29	12	9	16	18	20	13	14	26	18	26	21
PTMA	4	1	0	1	0	1	0	3	0	0	0	2	4	3	5	0	0	0	0	2	2	0	0	0	0	0	0	0	0	0	0	0	1	0	0	0	0	0	0	0	0	0	0	0	0	0	0	0	0
PYGL	1	0	1	5	5	1	6	6	8	11	4	5	2	1	1	6	11	11	1	1	0	7	6	9	2	1	0	4	7	9	1	4	3	1	1	1	0	2	10	1	10	11	2	11	13	3	2	2	1
RAB10	2	0	1	1	1	2	1	2	0	2	2	1	4	4	4	2	1	1	2	1	1	2	6	5	1	1	1	1	2	1	2	1	1	2	2	3	2	1	1	1	4	2	2	3	2	1	1	4	4
RAB11A	1	2	2	1	1	3	2	6	4	5	4	5	4	3	2	3	2	3	3	3	3	0	3	4	3	1	3	1	4	5	2	1	5	4	0	2	1	3	4	4	3	3	3	0	0	5	5	7	4
RAB13	2	1	0	0	0	2	2	2	0	0	0	2	3	3	3	1	1	0	1	1	1	1	2	1	0	0	1	1	0	1	2	0	1	2	1	1	1	1	1	1	1	2	0	2	1	2	1	2	2
RAB1A	4	4	1	1	3	0	0	4	2	3	3	6	5	2	3	3	4	2	3	0	1	0	3	3	0	0	1	1	4	4	1	1	3	3	4	2	2	0	2	2	4	5	0	3	4	0	1	0	0
RAB35	5	3	0	4	0	1	5	6	2	2	3	4	3	4	3	4	2	4	8	3	5	5	4	5	0	0	2	1	3	3	3	0	5	7	4	2	3	4	2	4	6	6	3	2	2	2	3	1	2
RAB5C	4	3	2	4	2	2	5	5	4	3	5	5	4	3	6	3	3	5	7	2	4	5	5	7	3	2	5	4	3	4	8	4	7	3	4	3	7	5	3	3	7	6	5	4	4	5	3	3	3
RAB7A	4	0	2	2	0	1	3	4	5	4	7	4	7	5	4	2	7	6	4	6	5	5	3	5	2	2	7	5	2	4	5	3	8	5	4	4	5	3	4	6	7	6	4	4	6	3	5	5	7
RAB8A	2	1	0	2	1	0	2	4	2	2	3	1	3	5	3	1	1	1	2	2	2	2	1	2	1	1	2	2	2	3	2	0	3	2	3	3	2	1	3	1	4	4	0	3	3	1	1	3	2
RAB8B	1	0	0	0	0	0	0	1	0	0	0	0	2	4	4	0	0	0	1	0	1	0	1	1	0	0	1	0	0	0	0	1	2	1	0	1	1	0	0	1	1	1	0	0	0	0	0	1	1
RAC1	3	0	0	1	2	1	2	3	3	2	2	2	9	4	5	3	1	2	1	1	0	2	4	2	0	0	0	0	2	2	2	1	3	3	2	3	1	0	1	0	1	3	2	1	1	2	1	2	1
RACGAP1	2	0	0	0	0	0	0	1	0	1	0	4	9	12	12	0	0	0	1	0	0	0	0	0	0	0	0	0	0	0	0	0	0	1	0	0	0	0	0	0	0	1	0	0	0	2	0	2	0
RACK1	4	8	0	3	3	2	3	4	6	5	5	4	1	0	2	2	6	4	0	1	3	6	6	6	6	3	2	6	4	5	6	1	2	1	0	0	5	3	3	3	9	5	0	6	4	3	3	3	3
RALA	2	0	0	3	1	2	1	2	1	3	0	3	9	8	6	4	7	5	5	6	3	5	10	2	0	0	2	1	2	4	0	1	8	5	6	5	4	6	2	1	5	4	0	1	2	2	2	6	4
RAN	7	7	3	8	2	8	7	6	6	8	9	7	7	4	4	5	12	9	6	7	4	7	6	9	8	6	7	7	10	9	3	7	5	4	1	3	6	9	3	4	6	4	8	6	5	5	4	3	6
RANBP1	3	0	0	0	0	0	0	2	0	0	1	0	1	1	2	1	1	1	0	0	0	1	0	1	0	0	0	0	0	0	0	0	1	0	0	1	0	0	0	0	0	0	0	0	0	0	0	0	0
RAP1B	1	3	1	1	0	1	1	0	0	0	0	0	0	0	0	0	2	0	1	0	0	0	1	0	0	0	0	2	2	0	0	0	1	1	1	1	0	0	0	0	5	0	0	0	0	0	0	0	0
RAP2B	1	0	0	1	0	0	1	2	1	3	2	2	2	4	2	0	1	1	0	3	3	1	1	2	2	0	3	0	3	1	1	1	1	2	3	2	2	2	1	1	2	1	0	1	1	2	3	2	1
RAP2C	1	0	0	1	1	0	1	1	1	1	1	3	2	1	2	0	1	1	2	1	1	2	0	0	0	1	1	0	1	1	1	1	1	2	0	0	1	3	0	1	2	1	2	1	1	1	0	0	1
RBBP4	1	1	0	2	1	4	2	2	4	3	3	2	1	0	1	3	2	2	2	1	0	4	1	2	5	4	1	0	2	6	1	2	1	0	0	0	1	4	1	2	3	3	4	3	0	1	0	1	1
RHOA	2	5	3	5	4	0	4	6	2	2	2	4	6	7	7	1	3	4	2	6	5	3	4	5	1	2	3	1	5	5	2	0	11	7	8	7	1	5	1	0	7	4	7	4	3	2	2	3	3
RHOT2	1	0	1	0	0	0	1	1	0	0	0	0	1	1	1	0	0	0	1	1	1	0	0	1	0	1	0	0	1	0	1	1	0	1	0	1	0	1	0	0	0	0	1	0	0	1	1	1	0
RNPS1	2	0	0	0	0	0	0	0	0	1	1	0	1	2	0	0	0	0	0	0	0	0	0	0	0	0	0	0	0	0	0	0	0	0	0	0	0	0	0	0	0	0	0	0	0	0	0	0	0
RPL10	1	0	0	2	2	1	0	1	1	2	1	1	2	2	0	3	2	2	0	0	0	1	2	1	0	1	0	2	2	2	1	1	1	3	0	1	1	1	2	1	0	1	1	1	1	1	1	1	1
RPL11	1	0	0	2	1	1	1	1	3	2	4	1	1	2	2	3	2	1	1	0	0	2	2	1	1	1	1	1	3	3	2	1	2	1	0	0	3	2	0	1	2	1	3	1	0	1	1	0	1
RPL12	2	0	0	1	1	2	0	1	1	2	4	2	1	2	0	2	2	2	0	1	1	1	2	1	2	1	0	2	3	1	1	1	1	0	0	0	3	0	0	1	2	2	0	2	0	1	0	0	0
RPL13	4	4	0	2	0	0	2	4	3	3	3	4	6	3	3	3	3	3	2	1	1	2	3	2	2	1	1	2	5	4	2	2	3	7	2	2	3	1	2	1	1	1	2	0	0	2	2	2	2
RPL13A	3	0	1	2	0	0	1	0	1	2	2	2	3	2	3	0	2	1	1	1	1	2	2	2	1	1	0	1	1	2	1	0	2	5	2	2	1	1	0	0	2	0	2	2	2	1	0	0	0
RPL14	1	0	0	1	0	0	1	1	1	1	1	1	1	0	1	1	1	1	1	0	0	1	1	1	1	0	0	1	0	1	1	1	1	4	1	1	1	0	1	1	1	0	1	1	1	1	0	1	1
RPL15	4	0	1	0	5	0	0	1	0	4	5	1	5	0	0	3	4	1	0	0	0	1	1	0	0	0	0	1	2	2	0	0	1	4	1	2	1	0	1	0	0	0	0	2	0	2	1	0	1
RPL17	3	1	0	4	2	0	0	3	2	4	3	1	5	3	3	1	4	5	1	0	0	3	3	2	0	0	0	2	2	3	2	1	2	3	0	2	2	1	1	1	2	3	0	3	2	1	0	0	0
RPL18	2	1	2	5	2	0	1	4	3	2	2	3	2	3	1	2	2	2	2	1	0	2	3	2	1	0	1	1	1	2	1	0	1	7	3	5	2	2	0	1	0	0	1	2	1	1	1	0	0
RPL18A	2	2	1	1	0	0	1	0	3	4	2	2	2	3	1	1	2	3	0	0	0	4	3	5	1	0	0	2	3	3	2	0	2	4	0	0	2	1	1	2	1	2	3	1	1	2	0	1	0
RPL19	1	0	1	0	0	0	0	0	0	1	1	0	0	0	0	0	0	0	0	0	0	0	0	0	0	0	0	0	0	0	0	0	0	1	1	1	0	0	0	0	0	0	0	0	0	0	0	0	0
RPL24	1	0	0	1	0	1	0	0	0	0	0	1	2	1	2	0	1	0	1	0	0	1	1	0	0	0	0	1	0	0	1	0	0	2	0	1	1	0	0	1	1	1	0	0	0	1	0	0	0
RPL26	1	0	0	2	0	0	0	2	3	2	3	4	1	2	0	2	3	2	1	0	0	0	1	0	1	0	0	1	2	4	1	0	2	4	1	1	1	1	2	0	1	0	0	2	2	0	0	0	0
RPL27	2	0	0	0	0	0	0	1	0	2	2	0	2	3	3	2	2	1	0	0	0	2	3	2	0	0	1	2	3	2	1	0	1	4	1	2	1	0	0	0	0	0	1	0	0	1	1	1	1
RPL27A	1	0	0	0	0	1	0	1	2	2	2	1	3	2	1	0	1	0	1	0	0	1	1	1	0	0	0	0	2	1	1	0	1	1	0	0	2	0	0	0	0	0	0	0	0	1	1	1	1
RPL28	4	2	0	4	1	2	1	3	3	4	3	4	3	2	3	4	5	4	1	0	0	3	3	2	0	0	2	0	4	3	1	3	2	6	4	6	5	4	3	4	2	1	4	2	1	0	0	1	1
RPL29	1	0	1	0	1	0	0	0	0	1	0	0	1	0	0	1	1	0	0	0	0	0	0	0	0	0	0	0	0	1	0	0	0	1	0	1	0	0	0	0	0	0	0	0	0	0	0	0	0
RPL3	4	4	1	2	3	0	1	2	2	5	3	0	7	8	3	1	2	2	0	0	0	1	2	0	1	0	0	0	1	4	1	0	1	7	2	3	1	0	1	1	1	0	0	1	1	1	0	0	0
RPL30	1	1	0	0	0	0	0	1	0	0	0	0	0	0	0	0	0	0	0	0	0	1	0	0	0	0	0	0	0	0	0	0	0	1	0	0	0	0	0	0	1	0	0	0	0	0	0	0	0
RPL34	2	0	0	1	0	0	0	0	0	0	0	0	0	0	0	1	1	1	0	0	0	1	0	1	0	0	0	0	0	0	0	0	0	2	2	1	0	0	0	0	0	0	0	0	0	0	0	0	0
RPL35A	3	2	0	3	1	0	0	2	2	3	4	2	6	1	5	1	4	4	1	2	0	3	3	3	2	1	1	1	4	1	1	1	1	5	3	4	3	3	1	0	3	0	1	2	1	1	0	0	0
RPL36	2	0	0	0	0	0	0	0	0	1	1	0	3	0	0	0	1	0	0	0	0	1	0	0	0	0	0	0	0	0	0	0	0	1	0	0	0	0	0	0	0	0	0	1	1	0	0	0	0
RPL4	8	1	1	2	2	1	1	1	4	4	6	2	12	9	7	2	4	1	1	1	0	0	0	1	0	0	0	2	2	2	1	0	0	10	4	4	2	0	0	0	1	0	0	0	0	2	0	1	0
RPL5	6	2	0	4	3	0	0	2	3	4	8	4	5	6	1	9	7	5	0	0	0	8	5	6	0	0	1	0	4	5	2	1	0	5	0	1	3	3	2	1	2	2	2	4	2	0	0	1	1
RPL6	3	0	1	3	3	1	2	4	4	7	5	3	6	5	3	3	7	5	1	1	1	5	0	4	2	2	2	4	3	7	3	1	1	8	2	4	5	2	2	2	4	4	3	3	3	3	0	0	1
RPL7	7	1	4	2	1	1	1	1	5	4	6	3	9	3	4	5	5	4	1	2	2	4	3	4	1	0	0	3	2	2	2	0	1	15	5	6	2	1	3	2	1	0	1	1	0	1	0	0	1
RPL7A	4	3	4	0	1	0	0	2	1	4	4	1	8	4	6	3	3	1	0	0	1	2	0	1	1	0	0	2	3	3	1	0	1	8	2	3	1	0	1	0	2	0	0	1	1	0	0	0	2
RPL7L1	1	0	1	0	0	0	0	0	0	0	0	0	0	0	0	0	0	0	0	0	0	0	0	0	0	0	0	0	0	0	0	0	0	0	0	0	0	0	0	0	0	0	0	0	0	0	0	0	0
RPL8	2	1	2	2	2	2	1	2	1	3	3	2	3	6	3	2	3	1	1	0	0	3	1	2	0	0	0	1	2	3	1	1	1	5	2	2	1	1	2	0	1	0	0	1	2	1	0	0	1
RPL9	1	0	0	3	0	1	2	1	4	5	4	2	0	1	1	1	3	3	0	0	1	2	1	0	0	0	1	5	1	4	1	0	1	0	0	0	2	0	0	0	1	1	0	2	1	1	0	0	1
RPLP0	4	1	0	5	3	1	2	3	3	4	2	4	0	1	0	5	4	6	3	1	1	5	6	2	3	3	1	5	1	3	4	2	1	1	0	0	6	4	4	2	2	3	4	1	3	4	1	2	4
RPLP1	1	0	1	1	2	2	1	1	1	2	2	1	1	0	1	1	1	1	1	0	1	3	1	2	0	1	0	0	1	1	0	0	0	1	1	1	1	0	1	1	3	1	1	1	1	1	0	0	1
RPLP2	3	0	1	6	1	2	0	4	3	6	8	2	5	7	5	6	5	7	2	1	1	4	5	6	1	0	2	4	5	6	0	1	0	1	0	1	4	4	2	3	2	3	1	2	1	1	0	0	1
RPS10	3	0	0	2	1	2	1	1	3	3	4	2	0	2	1	2	2	2	1	1	1	2	2	2	2	0	2	1	3	2	1	1	1	1	2	2	2	2	0	3	1	0	3	0	2	2	0	1	1
RPS11	5	5	1	1	1	1	2	4	4	3	3	5	6	4	5	1	3	4	1	1	0	3	3	3	2	1	1	2	6	5	3	1	3	5	5	2	6	4	0	4	2	2	5	1	1	2	1	0	1
RPS12	2	0	0	2	1	2	0	1	1	4	1	1	1	1	0	0	0	0	0	0	0	1	0	3	0	0	0	1	1	0	0	0	1	0	0	0	0	0	0	0	0	0	1	1	1	0	3	0	0
RPS13	2	0	0	1	1	0	2	3	2	3	2	3	5	4	3	2	3	3	3	1	2	4	1	1	3	2	2	3	1	1	1	1	3	5	1	2	5	2	2	2	2	4	3	2	2	2	1	2	0
RPS14	1	0	0	1	2	0	0	0	1	2	2	1	0	0	0	1	1	1	0	0	0	2	0	1	2	0	0	1	0	2	1	0	0	1	0	0	2	0	1	0	0	0	0	1	0	0	0	0	1
RPS15	1	0	0	2	0	0	0	1	1	2	3	0	5	4	1	0	0	1	0	0	0	1	0	2	0	0	0	0	2	2	0	0	0	3	1	0	1	1	0	0	1	1	0	0	0	0	0	0	0
RPS15A	1	0	0	2	1	2	0	0	3	2	3	1	0	1	0	0	2	3	2	0	0	2	1	1	2	0	0	3	2	2	0	1	1	0	0	0	3	2	0	1	1	1	3	0	0	1	0	0	0
RPS16	5	1	0	3	1	1	1	2	2	2	3	3	3	3	4	2	1	3	1	1	2	2	3	2	1	2	1	2	4	4	2	1	1	4	2	1	5	3	1	3	2	1	4	1	0	1	0	1	2
RPS18	4	6	2	2	3	3	4	2	4	4	2	3	11	7	6	7	4	6	3	0	1	2	4	3	2	1	2	6	5	4	3	2	4	7	4	6	9	1	3	3	4	2	2	5	2	2	3	3	1
RPS2	9	7	4	3	5	2	3	4	5	7	5	5	5	4	6	6	7	6	6	1	1	5	6	4	3	0	1	5	4	8	3	3	2	12	4	5	6	3	2	2	4	2	3	3	2	4	3	3	2
RPS20	1	0	0	0	0	0	0	1	1	0	2	0	1	0	0	0	2	3	0	0	0	2	1	1	0	0	0	1	0	1	0	0	0	0	0	0	0	0	0	0	1	0	0	0	0	0	0	0	0
RPS24	2	0	0	2	1	1	0	0	1	2	2	2	1	2	0	3	2	1	0	0	0	1	1	2	0	0	0	1	1	3	1	0	1	1	0	0	2	0	0	2	2	1	0	2	2	0	0	1	0
RPS25	1	0	0	0	0	1	1	2	0	1	1	0	1	2	2	1	2	1	0	0	0	0	0	1	0	0	0	1	0	0	0	0	0	1	2	3	1	0	1	0	0	0	0	0	0	0	0	0	0
RPS28	1	0	0	0	0	1	0	0	0	2	2	0	0	0	0	0	0	0	0	0	0	0	0	0	0	0	0	0	0	0	0	0	0	0	0	0	0	0	0	0	0	0	0	0	0	0	0	0	0
RPS3	9	7	0	4	4	4	6	5	6	9	10	5	4	4	3	7	7	10	3	2	1	7	10	11	10	5	5	8	6	10	4	6	4	4	1	2	9	8	5	5	7	3	10	5	4	6	2	0	1
RPS3A	6	6	1	1	2	1	0	1	2	3	3	1	3	4	2	5	1	2	0	0	0	0	4	3	0	0	0	1	2	3	0	0	0	9	2	2	2	0	0	1	0	0	1	1	1	0	0	0	0
RPS4X	9	4	0	4	1	1	4	3	5	7	7	9	5	6	5	0	9	11	4	2	3	5	6	6	4	4	2	5	6	3	3	4	3	13	4	4	6	6	1	1	4	2	4	2	2	5	1	7	3
RPS5	1	1	0	1	2	3	0	1	5	7	6	4	3	3	4	2	3	4	0	0	0	3	4	2	1	1	1	1	5	6	1	1	0	1	0	0	5	4	0	3	5	1	2	3	2	0	1	0	0
RPS6	5	0	2	2	1	0	0	2	2	2	1	0	4	4	3	1	2	0	0	1	1	2	1	1	0	0	0	1	1	2	1	0	0	5	2	4	1	0	1	0	1	0	0	1	1	0	0	0	0
RPS8	6	1	2	1	3	0	0	3	1	2	1	2	3	3	1	1	1	0	0	0	0	2	2	2	0	0	0	2	1	2	1	0	0	6	2	3	2	0	0	0	2	0	1	2	0	1	1	1	0
RPS9	6	2	1	1	0	0	3	1	2	2	3	2	2	4	2	1	1	2	2	1	1	2	2	3	3	2	1	3	4	6	1	1	3	11	2	3	3	5	0	3	0	1	4	0	0	2	0	0	1
RPSA	5	5	0	7	5	4	4	2	9	7	8	5	2	4	1	7	11	9	6	1	1	6	8	9	5	4	5	8	4	4	5	5	5	3	2	2	5	4	5	8	9	8	8	6	5	3	4	1	0
RRM1	1	1	0	3	2	0	0	3	3	2	5	0	0	0	0	2	1	3	1	1	1	1	1	1	1	1	1	1	3	2	1	0	1	1	0	0	4	2	1	1	2	2	2	3	3	0	0	0	0
RUVBL1	4	2	0	6	5	2	4	2	7	9	15	8	2	2	1	4	6	10	5	2	1	8	8	11	4	1	1	9	7	7	3	2	4	2	0	0	8	4	6	5	8	7	7	8	6	4	3	3	1
RUVBL2	1	0	0	5	5	1	1	4	6	8	10	3	1	2	0	11	4	5	4	1	0	6	10	9	4	0	1	3	9	10	4	2	4	0	0	1	8	5	5	4	6	5	7	7	6	4	2	1	3
S100A11	2	0	0	0	0	0	0	0	0	0	0	0	0	0	0	0	0	0	0	0	0	0	0	0	0	0	0	0	0	0	0	0	1	0	0	0	0	0	0	0	1	1	0	0	0	0	0	0	0
S100A7	3	0	0	0	0	0	0	0	1	0	0	0	0	0	0	0	0	0	0	0	0	1	0	0	0	0	0	0	0	0	0	0	0	0	0	0	0	0	0	0	1	0	0	0	0	0	0	0	0
S100A9	2	0	0	0	0	0	0	0	0	0	0	0	0	0	0	0	0	0	0	0	0	0	0	0	0	0	0	0	0	0	0	0	0	0	0	0	0	0	0	0	1	0	0	0	0	0	0	0	0
SAMHD1	1	0	0	1	2	0	0	0	2	3	3	0	0	0	0	2	0	0	0	0	0	2	3	3	0	0	0	0	1	2	0	0	0	0	0	0	2	0	0	0	3	1	1	2	1	0	0	0	0
SAR1A	1	0	0	1	0	0	0	0	0	1	1	2	0	0	0	0	1	0	0	0	0	1	1	1	1	0	0	0	2	1	0	0	0	0	0	0	0	0	0	1	1	1	1	0	1	1	0	0	0
SARS	2	0	0	1	3	1	1	0	1	2	3	1	1	1	0	4	4	7	2	0	0	3	3	3	3	1	0	4	5	3	0	1	2	0	0	0	3	3	6	0	7	2	2	9	6	1	0	1	0
SBSN	3	0	0	1	0	0	0	0	0	0	0	0	0	0	0	0	0	0	0	0	0	0	0	0	0	0	0	0	0	0	0	0	0	0	0	0	0	0	0	0	2	0	0	0	1	0	0	0	0
SDC4	1	1	1	0	0	0	0	0	0	0	0	0	1	1	0	0	0	0	0	0	0	0	2	0	0	0	0	0	0	0	0	0	0	2	4	4	0	0	2	0	0	0	0	0	0	0	0	0	0
SDCBP	12	4	14	12	8	19	8	10	8	5	7	8	17	13	17	11	19	14	20	17	20	10	12	8	8	7	11	10	16	14	12	13	20	33	44	39	8	31	9	5	15	17	20	13	10	8	6	10	9
SEPT6	1	0	0	0	0	0	0	1	0	0	0	0	0	0	0	0	0	0	0	1	1	1	1	0	1	1	0	1	0	0	0	1	0	0	0	0	0	2	1	1	0	0	1	1	0	2	1	0	0
SERINC1	1	1	1	3	2	2	1	3	0	1	1	3	4	3	4	2	2	2	3	3	2	4	4	4	2	2	3	1	4	3	3	1	4	6	4	4	2	4	3	2	3	2	2	1	1	3	2	2	3
SERPINA10	1	0	0	1	1	0	1	0	1	1	1	1	0	0	0	1	1	1	1	1	1	1	0	0	1	1	1	0	1	1	0	0	0	0	1	1	0	0	0	0	0	0	1	1	1	0	0	1	1
SERPINB3	2	0	0	0	0	0	0	0	0	0	0	0	0	0	0	0	0	0	0	0	0	0	0	0	0	0	0	0	0	0	0	0	0	0	0	0	0	0	0	0	13	0	0	0	0	0	0	0	0
SERPINC1	1	0	0	0	0	1	3	1	1	1	0	2	0	0	0	1	2	1	2	1	2	3	1	1	3	3	3	2	0	0	1	2	2	2	0	0	2	1	2	2	1	1	1	2	2	1	0	1	3
SFPQ	5	0	0	2	1	0	0	0	0	1	3	0	0	0	0	0	0	0	0	0	0	2	0	1	0	0	0	0	1	0	0	0	0	0	0	0	0	0	0	0	0	0	0	0	0	0	0	0	0
SFT2D2	1	1	1	0	1	0	0	1	0	1	1	1	0	1	1	0	1	1	1	1	1	1	0	1	0	0	1	0	0	0	0	0	1	1	0	0	0	0	0	0	0	0	0	0	0	0	1	0	1
SH3GL1	2	1	0	3	0	0	1	2	2	1	0	2	11	3	6	3	6	5	3	1	2	3	1	2	0	0	1	3	3	4	2	1	3	2	6	2	2	0	0	0	6	1	2	0	1	2	2	2	1
SLC16A1	3	4	1	4	3	1	4	6	4	4	5	5	13	8	8	6	7	5	6	8	4	7	4	5	3	3	5	5	3	5	4	3	7	6	5	7	2	10	5	2	11	8	7	4	5	6	4	6	8
SLC19A1	1	1	1	1	0	0	1	2	0	1	0	1	3	2	4	0	1	0	1	1	1	2	1	1	0	0	0	0	0	1	0	0	1	2	1	1	1	1	1	0	1	2	0	0	0	1	0	0	0
SLC19A2	2	3	2	0	0	0	0	1	0	0	0	0	2	1	2	1	1	2	1	3	4	5	3	2	1	1	2	1	3	3	3	0	2	1	2	0	0	1	0	1	3	4	3	3	3	2	2	3	0
SLC1A3	1	0	1	0	0	0	0	2	0	0	0	1	3	2	2	0	1	1	1	1	1	2	2	3	1	1	4	0	1	1	2	1	4	0	1	0	1	3	3	0	3	3	2	1	2	1	2	3	4
SLC1A5	10	9	5	7	3	4	5	7	7	5	5	10	13	8	17	8	7	8	11	7	7	9	8	7	6	8	8	4	8	7	8	5	8	15	9	8	8	14	10	4	7	8	8	5	5	8	3	7	7
SLC29A1	1	1	1	2	1	0	1	1	0	1	2	1	6	2	2	2	4	3	2	3	2	2	2	3	1	0	1	0	2	2	2	0	4	2	2	2	2	4	2	0	2	3	1	1	1	1	2	2	1
SLC38A2	1	0	1	2	1	1	0	1	0	1	0	2	1	1	4	3	1	0	2	3	2	2	1	1	0	0	1	1	1	1	1	0	1	3	2	1	1	2	0	1	1	2	1	1	0	1	1	2	1
SLC3A2	12	2	9	13	7	12	15	15	9	16	10	18	30	23	24	10	19	15	17	20	15	16	14	12	6	6	17	10	12	13	18	9	23	19	32	27	19	27	16	12	16	19	14	13	13	17	15	16	17
SLC44A1	1	0	0	1	0	0	1	1	1	2	0	1	1	0	0	0	0	2	3	1	2	0	0	1	0	0	0	0	0	0	0	1	2	1	0	1	0	3	1	0	4	1	1	0	1	0	1	2	2
SLC7A5	2	4	2	2	1	0	2	2	1	3	1	2	2	4	5	3	3	3	3	7	7	4	4	4	1	2	6	4	2	3	6	2	4	3	3	3	7	6	4	3	6	4	5	3	3	2	2	1	1
SMN1	1	0	0	0	1	0	0	1	0	3	3	0	0	0	0	0	3	0	0	0	0	1	0	0	0	0	0	0	0	0	0	0	0	0	0	0	0	0	0	0	0	0	0	0	0	0	0	0	0
SMPDL3B	1	1	0	0	0	1	2	2	0	1	0	1	3	3	2	0	3	1	0	4	3	1	3	2	0	0	0	0	4	0	0	0	2	1	1	1	0	1	1	3	7	6	3	2	1	3	2	6	5
SNAP23	1	0	0	1	0	1	1	3	2	1	3	6	9	6	5	2	5	3	3	3	3	4	3	1	0	0	1	2	2	2	1	0	3	2	3	2	3	4	4	0	4	3	1	1	0	3	1	4	2
SNRNP70	1	0	0	4	1	0	0	1	1	1	3	0	2	1	1	1	2	2	0	0	0	0	0	1	0	0	0	0	1	3	0	0	0	2	0	0	0	0	0	0	0	0	0	0	0	0	0	0	1
SNRPD1	1	0	0	0	1	0	0	2	0	1	2	0	1	0	0	0	0	0	0	1	0	2	0	0	2	0	0	0	0	1	0	0	0	1	1	0	0	1	0	0	1	1	1	2	1	0	0	0	0
SNRPD2	2	1	0	1	0	0	0	0	0	1	2	0	0	0	0	0	1	2	0	0	0	0	0	0	0	0	0	0	0	0	1	0	1	0	0	0	1	0	0	0	0	0	0	0	0	0	0	0	0
SOD1	1	0	0	0	0	0	0	0	0	0	0	1	3	2	2	0	0	0	1	1	0	1	0	1	0	0	0	0	0	0	0	0	1	1	0	0	0	0	0	0	1	1	0	0	0	1	1	1	1
SRRM1	1	0	0	0	0	0	0	0	0	0	0	0	0	0	0	0	0	0	0	0	0	0	0	0	0	0	0	0	0	0	0	0	0	1	0	0	0	0	0	0	0	0	0	0	0	0	0	0	0
SRSF1	2	0	2	0	0	0	0	1	1	4	3	2	4	5	1	3	3	1	0	0	0	2	0	0	0	0	0	1	2	4	0	0	0	6	0	0	0	0	0	0	0	0	0	0	0	0	0	0	0
SRSF2	1	0	0	0	1	0	0	2	0	1	2	2	4	4	4	1	2	0	0	0	0	2	0	0	0	0	0	0	0	2	0	0	0	3	1	1	0	0	0	0	0	0	0	0	0	0	0	0	0
SRSF3	4	0	1	1	0	0	0	1	1	2	2	1	0	1	1	1	0	1	0	0	0	2	1	0	0	0	0	0	1	1	0	0	0	3	0	0	1	1	0	0	1	0	0	0	0	0	0	0	0
SRSF4	5	0	2	0	0	1	1	3	2	3	6	7	2	5	2	0	2	3	0	0	0	2	0	0	0	0	0	0	1	3	0	0	0	8	2	2	0	0	0	0	0	0	0	0	0	0	0	0	0
SRSF6	2	0	0	0	4	0	0	1	1	1	1	2	0	1	0	4	0	0	0	0	0	0	0	0	0	0	0	0	0	2	0	0	0	1	0	0	0	0	0	0	0	0	0	0	0	0	0	0	0
SRSF7	1	0	1	0	0	0	0	0	0	1	0	0	0	0	0	1	0	0	0	0	0	0	0	0	0	0	0	0	0	1	0	0	0	0	0	0	0	0	0	0	0	0	0	0	0	0	0	0	0
STXBP3	3	0	0	1	0	3	3	6	8	9	3	10	7	6	10	2	6	1	5	5	5	3	3	3	1	0	5	2	3	5	3	1	10	4	5	5	2	6	4	4	8	6	3	5	2	4	1	3	5
SUB1	1	0	0	0	0	0	0	0	0	0	0	1	1	1	0	0	1	0	0	0	0	0	0	0	0	0	0	0	1	0	0	0	0	1	0	0	0	0	0	0	1	0	0	0	0	0	0	0	0
SULT1E1	1	0	0	0	0	0	0	1	1	0	0	1	0	0	0	0	1	0	0	0	0	0	0	1	0	0	0	0	0	0	0	0	0	0	0	0	0	0	0	0	0	0	0	0	1	1	0	0	1
SUMO3	1	0	0	1	0	1	1	0	1	0	1	0	0	0	0	0	0	0	0	0	0	1	1	1	0	0	0	0	0	1	0	0	1	0	0	0	0	0	0	1	0	1	1	1	1	1	0	1	1
SUPT16H	2	0	0	2	0	0	0	0	1	2	3	0	2	3	3	0	0	0	0	0	0	1	0	0	0	0	0	0	1	1	0	0	0	4	0	0	0	0	0	0	0	0	0	0	0	0	0	0	0
TAGLN2	4	0	0	5	1	0	1	5	1	1	3	2	4	5	5	0	4	3	0	2	2	3	6	3	2	2	2	1	4	3	1	1	3	1	0	1	2	1	3	0	5	4	2	2	2	3	0	0	0
TARDBP	1	0	0	1	0	1	0	0	3	4	3	1	0	0	0	2	2	3	1	0	0	4	4	3	0	0	0	0	2	3	0	0	0	0	0	0	1	0	2	1	3	3	1	3	2	0	0	0	1
TCP1	3	0	0	10	9	4	5	7	9	8	9	8	5	3	6	9	9	9	1	4	2	9	11	9	3	4	1	9	5	11	1	2	8	1	0	0	4	4	4	0	6	6	5	8	8	2	0	2	2
TFRC	5	1	1	7	3	2	4	11	3	6	4	11	8	8	7	4	7	3	12	8	13	9	4	7	2	2	5	0	4	7	6	2	10	5	5	3	6	4	4	5	5	4	4	3	2	10	5	10	12
THRAP3	1	0	0	1	1	0	0	0	1	6	7	0	0	2	0	1	0	1	0	0	0	3	0	2	0	0	0	0	1	3	0	0	0	1	0	0	0	0	0	0	0	0	0	0	0	0	0	0	0
TLN1	12	4	3	37	12	24	17	31	22	14	24	7	12	10	8	16	37	44	5	17	14	8	11	14	16	14	16	19	36	24	1	3	4	0	0	0	4	8	17	5	15	14	13	26	20	5	5	11	8
TMSB10	1	0	0	1	0	0	1	2	0	1	0	1	1	1	1	0	0	0	0	1	1	0	0	0	0	0	0	0	0	0	0	0	0	0	0	0	0	0	0	0	1	1	0	0	0	0	0	0	0
TPI1	5	0	1	4	2	1	2	5	3	3	2	5	6	3	7	0	3	2	1	3	3	4	4	1	0	1	2	0	1	4	0	0	3	0	0	1	0	0	7	1	6	3	0	4	5	1	1	3	3
TPP2	2	4	2	9	9	6	1	0	1	6	5	4	0	0	0	1	12	5	0	0	0	0	0	0	0	0	0	0	0	1	0	0	9	3	0	1	0	0	0	0	0	1	0	0	0	7	1	1	13
TRAP1	1	3	1	1	0	2	1	4	1	0	0	0	1	1	1	1	1	1	1	0	0	1	1	1	1	1	1	1	1	1	1	1	1	2	1	1	1	1	1	0	1	0	2	1	1	1	0	1	1
TSG101	9	9	7	4	1	12	9	11	5	1	1	9	11	10	16	6	11	8	11	11	11	6	8	4	4	2	4	5	10	8	7	5	10	11	11	14	2	5	4	3	7	9	8	6	7	13	8	12	10
TSPAN6	1	2	1	1	1	1	1	1	1	1	1	1	1	1	1	1	1	1	0	1	1	1	2	1	1	1	1	1	1	1	1	1	1	2	1	1	1	1	1	1	5	1	1	1	1	1	1	1	1
TSPAN9	1	0	0	1	1	0	0	1	1	0	0	3	3	2	3	1	0	0	1	3	1	0	2	0	0	0	1	0	0	1	1	0	2	0	1	1	1	1	1	0	1	1	1	0	0	2	0	1	2
TTK	1	0	1	0	0	0	0	0	0	0	0	0	0	0	0	0	0	1	0	0	0	0	0	0	0	0	0	0	0	0	0	0	0	1	1	1	0	0	0	0	4	3	0	2	1	0	0	0	0
TTYH3	2	0	1	2	2	0	2	2	2	2	2	5	5	3	3	2	1	1	2	2	3	1	0	1	1	0	3	1	1	3	2	1	5	1	1	1	1	2	1	2	3	4	1	1	1	2	2	1	2
TUBA1B	7	2	5	5	1	7	3	4	5	1	0	9	7	5	7	4	5	5	5	5	3	5	1	1	4	5	5	5	6	0	7	8	4	7	10	3	1	7	4	1	1	3	9	4	4	4	6	4	3
TUBA3C	1	0	1	2	0	1	1	3	1	1	1	1	0	0	0	0	1	2	0	1	1	1	1	2	2	2	1	1	2	5	1	0	1	0	0	1	2	1	1	0	1	1	2	1	0	0	0	1	1
TUBA4A	24	36	8	15	9	27	12	17	13	19	21	17	8	11	8	15	21	25	18	11	10	16	18	18	14	12	13	15	22	39	13	13	19	21	0	10	19	24	16	10	17	12	28	18	19	11	0	8	8
TUBA4B	3	3	2	1	0	3	3	3	2	2	2	2	3	3	3	1	1	2	2	3	3	1	3	3	3	2	2	3	3	6	2	5	3	4	4	1	3	3	2	2	2	2	4	2	2	3	3	1	3
TUBAL3	1	0	0	0	0	0	2	0	2	2	2	2	0	0	0	0	3	4	0	0	0	2	0	2	0	0	0	2	0	0	0	0	0	0	0	0	4	0	0	3	1	0	5	2	2	3	1	0	2
TUBB	20	37	9	10	17	33	10	17	12	13	13	15	22	29	25	15	13	13	27	5	6	12	15	11	10	7	9	9	27	41	8	13	11	33	15	16	10	11	9	7	12	9	18	13	7	9	10	13	9
TUBB1	1	0	1	3	2	3	2	2	1	2	0	2	1	2	0	2	2	3	2	1	1	1	1	1	1	1	2	3	2	3	1	3	3	0	1	0	1	1	2	1	2	2	1	2	2	0	2	2	2
TUBB2A	2	0	0	2	0	0	0	1	0	4	3	1	0	1	1	3	1	0	1	0	0	0	1	0	0	1	0	4	2	2	1	0	2	0	0	0	3	1	0	2	0	2	2	1	2	1	0	0	1
TUBB4A	26	0	11	17	2	0	16	25	22	22	24	31	0	0	1	22	24	31	0	13	14	20	26	18	21	13	15	25	32	56	15	15	24	3	1	0	25	24	17	17	22	18	23	19	17	14	1	0	13
TUBB4B	2	12	1	3	0	4	1	1	1	1	2	2	2	6	1	3	2	2	4	1	1	2	2	2	1	1	1	3	2	6	1	1	3	1	1	3	0	0	2	1	1	2	1	2	2	1	0	5	1
TUBB6	1	1	0	2	2	2	0	2	1	3	6	3	0	2	0	3	1	4	2	1	1	4	4	6	0	0	1	0	8	9	0	2	0	0	0	0	4	4	1	0	5	0	3	0	2	0	0	0	0
TXN	2	2	2	1	0	0	1	2	2	1	3	1	2	0	2	0	1	0	1	1	0	3	2	1	0	0	0	0	1	2	0	1	3	2	0	0	0	1	2	2	2	1	2	2	1	1	1	0	1
UBA1	7	1	0	14	16	4	5	12	14	23	20	11	4	10	6	11	12	21	3	2	3	18	12	16	3	2	4	13	23	20	8	4	5	4	1	0	13	7	9	4	12	13	8	12	8	10	2	3	7
UBB	11	49	21	15	9	25	8	21	9	5	6	10	0	12	41	11	16	8	16	13	9	12	16	27	9	7	9	4	23	20	8	7	15	45	35	24	6	15	7	12	18	19	34	20	14	6	3	13	10
UBE2N	1	0	0	1	0	0	0	1	1	1	1	2	1	2	2	0	0	0	0	1	1	1	2	0	0	0	0	0	0	0	1	1	2	1	0	0	0	1	0	1	5	1	0	3	3	3	2	1	1
VAMP1	1	0	1	0	0	0	0	0	0	0	0	0	0	0	0	0	0	0	0	0	0	0	0	0	0	0	0	0	0	0	0	0	0	0	0	0	0	0	0	0	0	0	1	0	0	0	0	0	0
VAMP2	1	2	1	0	0	0	0	0	0	4	3	0	4	5	7	3	2	0	0	0	2	4	2	0	0	0	3	0	2	2	3	0	5	0	0	3	3	5	0	0	2	0	2	0	0	0	0	4	3
VASP	1	0	0	2	0	1	0	0	1	0	0	0	1	0	0	0	0	2	0	0	0	0	0	0	0	0	1	1	4	0	0	0	0	0	0	0	0	0	0	0	0	0	0	0	0	0	0	0	0
VCAN	1	0	0	1	2	2	0	0	0	1	2	0	0	0	0	0	1	0	0	0	0	1	0	0	0	0	0	0	0	0	0	0	0	0	0	0	0	0	0	0	0	0	0	0	0	2	0	0	0
VIM	22	83	13	22	24	26	17	21	33	39	44	35	19	24	18	26	28	26	19	18	15	19	23	22	1	1	2	21	35	35	8	14	26	29	21	14	20	24	17	5	17	20	12	15	14	22	12	19	14
VPS13B	1	0	0	0	0	0	0	0	0	0	0	0	0	0	0	0	0	0	0	0	0	0	0	0	0	0	0	0	0	0	0	0	0	0	0	0	0	0	0	0	0	0	0	0	0	0	0	0	0
VPS28	4	0	3	6	4	1	5	8	3	2	1	8	7	6	12	3	4	3	5	5	5	6	7	4	1	0	5	2	6	3	4	3	7	4	6	4	1	5	3	2	8	6	3	4	1	9	5	4	9
VPS37B	4	4	5	6	5	2	5	9	3	4	2	8	7	6	12	4	4	3	7	5	6	5	5	6	0	2	3	2	6	5	4	0	9	4	5	5	2	4	2	1	8	5	6	5	3	5	4	5	7
VPS37C	4	0	1	4	4	1	0	6	0	3	1	7	7	7	6	3	2	3	6	7	8	5	1	2	0	0	2	0	2	4	2	2	5	6	2	3	0	5	2	0	2	4	2	1	1	3	3	4	4
VPS4B	4	0	2	4	1	0	4	5	0	1	0	0	8	3	3	0	7	3	3	4	5	4	3	1	2	3	5	2	2	2	4	2	7	10	13	10	4	5	2	0	3	6	4	0	2	4	4	0	3
VTA1	1	0	0	3	1	3	2	3	0	0	1	3	6	2	4	2	5	4	4	3	4	3	4	5	1	2	3	2	5	4	4	1	3	4	5	4	4	8	4	2	6	7	4	4	2	2	4	3	4
VTN	6	6	4	2	4	5	2	2	3	3	5	2	1	1	2	4	4	3	3	2	2	3	3	4	2	2	2	2	3	3	1	3	3	6	4	4	1	3	4	2	3	2	3	4	4	1	1	1	2
WASL	18	0	0	0	0	0	0	0	0	0	0	0	0	0	0	0	0	0	0	0	0	0	0	0	0	0	0	0	0	0	0	0	0	0	0	0	0	0	0	0	0	0	0	0	0	0	0	0	0
WDR1	3	1	1	6	3	4	3	6	2	5	6	2	1	0	0	3	5	2	0	2	0	1	0	2	4	1	2	3	5	1	1	1	5	0	0	0	4	1	3	2	1	3	3	7	6	1	1	1	0
WDR77	3	5	1	2	2	3	2	2	4	5	4	4	0	0	0	2	6	5	3	6	5	5	8	2	1	2	3	5	3	4	3	2	6	4	2	2	5	3	2	2	8	2	4	1	2	4	5	4	5
WIPF1	2	0	0	0	0	0	0	0	0	0	0	0	0	0	0	0	0	0	0	0	0	0	0	0	0	0	0	0	0	0	0	0	0	0	0	0	0	0	0	0	0	0	0	0	0	0	0	0	0
WIPF2	10	0	0	0	0	0	0	0	0	0	0	0	0	0	0	0	0	0	0	0	0	0	0	0	0	0	0	0	0	0	0	0	0	0	0	0	0	0	0	0	0	0	0	0	0	0	0	0	0
XPNPEP3	1	0	1	0	0	1	1	0	1	0	0	0	0	0	0	0	1	0	0	1	1	0	0	0	1	1	1	1	1	0	1	0	0	0	0	0	1	1	0	1	0	1	1	0	0	1	1	1	1
XRCC5	3	1	0	8	5	3	3	6	9	13	13	7	2	3	0	8	5	8	4	2	2	10	9	10	5	2	1	4	7	11	3	1	6	2	0	0	11	7	7	2	9	8	10	11	9	1	0	1	4
YBX1	1	10	4	5	0	4	6	7	2	4	4	0	5	6	7	0	2	0	3	2	3	5	4	5	2	1	6	0	4	4	3	0	5	7	1	2	2	2	6	0	2	0	0	2	1	2	5	5	5
YWHAB	3	0	0	6	2	1	3	8	4	6	4	4	7	5	7	2	5	7	10	6	7	1	2	2	1	0	3	1	2	4	3	1	5	1	1	1	0	4	2	1	6	2	2	3	4	0	1	3	5
YWHAE	7	3	4	8	4	3	8	7	9	6	9	11	17	13	11	5	22	19	19	17	14	3	2	4	2	1	3	4	6	9	3	2	9	8	4	5	3	3	4	4	8	8	6	5	5	5	7	5	7
YWHAG	2	1	0	8	0	1	1	2	0	2	1	2	6	2	5	2	7	6	4	5	4	1	0	0	0	0	0	1	2	1	1	0	3	2	1	0	1	0	1	1	2	1	0	1	0	1	1	1	1
YWHAH	1	0	0	1	1	0	0	0	2	2	2	1	3	3	3	2	7	7	2	4	3	1	1	0	0	0	0	0	0	0	0	0	3	1	1	0	0	0	3	0	4	2	0	2	3	0	0	0	1
YWHAQ	7	4	5	6	4	2	6	7	5	5	7	9	11	7	6	4	14	11	12	10	9	7	6	6	7	3	4	3	6	7	5	5	5	8	2	4	6	6	3	5	10	7	6	5	6	5	5	5	3
YWHAZ	4	5	3	6	6	2	3	5	4	4	5	4	8	6	5	4	10	11	10	9	10	4	4	2	2	2	3	1	5	6	3	3	6	4	3	2	3	2	3	2	8	7	2	4	3	2	5	3	4
ZC3H11A	1	0	0	0	0	0	0	0	0	0	0	0	0	0	0	0	0	0	0	0	0	0	0	0	0	0	0	0	0	0	0	0	0	0	0	0	0	0	0	0	0	0	0	0	0	0	0	0	0
ZC3HAV1	4	5	3	6	0	9	11	23	4	2	1	1	15	7	10	3	8	3	1	5	5	8	7	6	1	1	7	2	9	11	7	1	14	3	4	3	2	5	4	2	7	10	4	2	3	13	8	13	13
ANKFY1	0	1	0	1	0	0	0	1	1	1	1	1	0	0	0	0	0	1	0	0	0	1	1	0	0	0	0	0	1	1	0	0	0	0	0	0	0	1	0	0	0	1	0	0	1	0	0	0	0
ANXA7	0	1	0	0	1	1	0	3	1	2	2	4	3	4	7	0	5	1	4	2	2	2	1	2	0	0	2	0	4	5	2	1	4	0	0	0	1	0	2	1	4	6	1	4	2	0	1	2	3
BAG2	0	1	0	0	0	0	1	3	0	0	1	0	0	0	0	0	0	0	0	0	0	0	0	1	0	0	0	0	0	0	0	0	0	0	0	0	0	0	0	0	0	0	0	0	0	0	0	0	0
BUB3	0	1	0	1	1	0	2	0	3	3	4	2	0	0	1	3	2	2	0	1	1	3	4	6	1	1	1	2	3	4	2	0	0	0	0	0	2	2	4	1	5	4	3	5	4	1	0	0	0
CAB39	0	1	0	1	0	0	1	2	0	1	3	0	0	1	1	0	1	0	0	0	0	0	0	0	0	0	0	0	0	0	0	0	1	0	1	1	0	0	0	0	1	1	0	1	0	1	0	0	1
CCT8	0	1	0	5	1	2	8	4	6	8	6	8	3	6	4	5	6	8	4	1	1	11	8	7	1	1	0	5	6	10	3	2	5	2	1	0	3	3	5	2	5	8	3	6	7	3	1	2	3
CD2AP	0	2	0	1	0	0	0	3	0	1	1	4	17	4	3	6	8	6	5	7	6	0	1	0	0	0	0	2	5	3	2	0	5	5	4	4	2	1	0	0	1	0	0	0	0	1	0	1	2
CD55	0	1	0	0	0	0	0	0	0	0	0	0	0	0	0	0	1	0	0	0	0	0	0	0	0	0	0	0	0	0	0	0	0	1	0	0	0	0	0	0	1	0	0	0	0	0	0	0	0
CHD2	0	4	0	0	2	0	1	2	2	3	2	3	2	3	1	1	1	1	1	0	0	2	3	2	0	0	0	0	1	2	1	0	1	3	0	0	1	0	1	0	1	0	0	2	0	1	0	0	1
CHMP2A	0	1	0	2	0	2	0	5	2	2	0	3	2	0	1	0	3	3	4	2	4	5	7	5	1	2	4	0	4	4	1	0	6	8	8	8	2	6	5	1	4	5	3	3	3	4	4	4	7
CHMP2B	0	1	0	3	0	1	0	2	0	0	0	1	6	2	2	1	1	2	3	3	3	2	7	3	1	1	2	0	4	3	1	1	3	5	6	7	0	3	2	1	2	3	3	1	1	2	2	5	3
CHMP4A	0	1	0	2	0	1	0	5	0	0	0	1	7	1	3	2	2	0	3	0	2	4	5	1	0	0	2	0	2	3	0	0	4	2	5	2	1	2	3	1	4	3	2	1	0	3	2	4	3
CHMP5	0	1	0	3	2	0	0	5	1	0	0	3	5	4	0	3	3	1	1	6	4	10	6	6	4	2	9	0	5	2	1	1	2	8	5	3	5	7	5	2	4	3	5	4	4	2	1	3	4
COPB1	0	1	0	2	2	0	0	2	2	5	3	3	0	0	0	2	2	2	0	0	1	2	2	3	1	0	0	0	1	2	1	0	1	0	0	0	1	1	3	0	3	2	1	3	2	1	0	1	0
DARS	0	1	0	5	3	0	1	2	7	6	12	4	0	0	0	6	5	7	1	0	0	11	8	8	4	2	1	3	5	6	1	2	2	0	0	0	7	2	4	2	6	2	4	7	3	1	0	0	1
DNAJB6	0	2	1	0	0	0	0	3	1	0	0	0	1	2	1	0	1	0	0	0	0	3	4	5	0	1	3	0	0	1	1	0	1	3	1	1	1	0	1	3	5	6	2	4	4	3	3	6	4
DNAJC5	0	1	0	0	0	0	1	0	0	0	0	0	3	3	1	0	2	3	2	2	2	3	2	3	0	0	0	0	1	1	0	0	2	1	0	0	0	1	1	0	2	2	0	1	0	0	1	0	1
DNAJC7	0	7	2	0	0	2	5	9	0	0	0	1	4	9	3	0	0	1	2	2	1	7	10	11	1	1	4	1	0	1	1	0	2	2	1	0	0	1	0	3	13	9	7	6	1	2	5	5	6
DSG2	0	1	0	5	5	2	4	14	2	6	4	16	20	11	11	10	15	13	13	16	16	15	6	10	0	1	9	4	8	9	10	3	20	5	13	13	13	15	18	1	8	10	1	5	2	10	10	12	15
DYNC1I2	0	1	0	1	1	0	0	1	1	2	4	0	0	1	0	1	0	1	0	1	0	2	5	6	2	2	0	1	1	2	1	1	0	0	0	0	0	1	1	1	2	0	2	4	1	0	0	0	1
EFNB1	0	1	0	1	0	0	0	3	0	0	0	2	2	2	3	0	2	0	3	3	0	2	3	4	0	0	1	1	2	1	0	0	3	3	4	3	0	3	3	0	5	4	1	1	1	4	1	2	3
EFNB2	0	1	0	0	0	0	0	0	0	0	0	0	0	0	0	0	1	1	0	0	0	0	0	2	0	0	0	0	0	0	0	0	2	1	0	0	0	2	1	0	1	0	1	0	0	0	0	0	0
EIF3B	0	1	0	7	3	0	0	2	8	8	11	6	1	1	1	6	4	6	1	0	0	6	5	6	1	1	1	4	6	8	2	2	2	2	0	0	6	1	3	3	4	2	1	4	4	1	0	0	1
EIF4B	0	2	0	0	0	0	0	0	0	0	2	0	0	0	0	0	0	0	0	0	0	0	0	0	0	0	0	0	0	1	0	0	0	0	0	0	0	0	0	0	0	0	0	0	0	0	0	0	0
F11R	0	1	0	1	0	0	0	3	0	0	0	1	2	2	2	0	2	1	2	1	2	1	4	2	0	0	0	0	2	1	1	0	4	2	1	1	0	1	1	0	2	2	1	2	2	2	1	3	1
GNB3	0	2	0	0	0	0	0	0	0	0	0	2	0	1	1	0	1	1	1	2	1	2	1	2	1	1	2	0	0	0	0	0	2	0	0	0	1	2	0	1	0	1	1	1	0	1	1	0	0
GPC3	0	1	0	0	0	0	0	0	0	0	0	0	3	1	0	0	0	0	0	0	0	0	0	0	0	0	0	0	0	0	0	0	0	0	0	0	0	0	0	0	0	0	0	0	0	0	0	0	0
GPC4	0	1	2	0	0	0	0	0	0	0	0	0	2	1	2	0	0	0	0	0	0	0	0	0	0	0	0	0	0	0	0	0	0	1	1	1	0	0	1	0	0	1	0	1	0	0	0	0	0
IGF2BP3	0	1	0	0	0	0	1	4	3	2	0	0	0	0	2	0	0	0	0	0	0	2	0	3	0	0	0	0	0	3	0	0	0	0	0	0	0	0	0	0	0	0	0	0	0	0	0	0	0
LAMB1	0	1	0	0	0	0	0	0	0	0	0	0	3	0	0	0	0	0	0	0	0	0	0	0	0	0	0	0	0	0	0	0	0	3	0	0	0	0	0	0	0	0	0	0	0	0	0	0	0
LGALSL	0	1	0	0	0	0	0	0	0	0	0	0	0	0	0	0	0	0	0	0	0	0	0	0	0	0	0	0	0	0	0	0	0	0	0	0	0	0	0	0	0	0	0	0	1	0	0	0	0
LMNB1	0	6	0	7	1	7	0	2	4	5	4	1	0	0	0	0	9	6	0	3	2	0	0	0	0	0	0	0	0	0	0	0	6	0	0	0	0	0	1	0	6	11	0	0	0	2	5	5	11
LMNB2	0	1	0	2	0	1	0	0	0	1	0	0	0	0	0	0	1	1	0	0	0	0	0	0	0	0	0	0	0	0	0	0	1	0	0	0	0	0	0	0	0	0	0	0	0	0	0	1	1
MAPK3	0	1	0	1	0	0	0	0	1	1	2	1	1	1	1	0	0	0	0	0	0	2	1	2	1	0	0	0	1	2	0	1	0	0	0	0	1	1	0	0	1	0	1	1	0	0	0	0	0
MCAM	0	1	0	0	0	0	0	1	0	0	0	0	3	1	1	1	1	0	1	4	1	0	1	3	0	0	1	0	2	0	0	0	1	1	3	1	1	2	3	0	5	4	0	0	0	1	0	1	1
MCM4	0	1	0	0	1	1	0	1	4	8	7	2	1	1	0	0	0	1	0	0	0	4	1	4	1	0	0	0	3	6	0	0	0	0	0	0	2	0	0	0	1	0	2	2	0	1	0	0	0
MOV10	0	1	0	2	0	0	4	13	0	0	0	0	5	3	3	0	1	1	0	0	2	8	5	7	0	0	3	3	5	4	4	0	9	1	0	0	1	3	1	1	5	7	2	4	4	8	6	12	14
MYH14	0	6	1	0	0	0	1	1	0	3	0	0	0	0	0	0	0	1	0	0	1	0	0	1	0	0	1	0	0	1	0	1	0	1	0	0	0	0	1	0	0	0	0	0	0	0	1	1	0
MYO1D	0	1	0	0	0	0	0	0	0	0	0	0	0	0	0	0	0	0	0	0	0	0	0	0	0	0	0	0	0	0	0	0	0	0	0	0	0	0	1	0	0	0	0	0	1	0	0	0	0
NCR3LG1	0	1	0	1	0	0	0	1	0	0	0	0	1	0	1	0	1	2	2	2	2	0	2	1	0	0	2	0	0	0	2	0	2	2	2	1	2	2	1	0	1	3	1	0	0	0	0	3	3
NPHS1	0	1	0	0	0	0	0	0	0	0	0	0	0	0	0	0	0	0	0	0	0	0	0	0	0	0	0	0	0	0	0	0	0	0	0	0	0	0	0	0	0	0	0	0	0	0	0	0	0
PABPC4	0	5	2	0	0	0	0	2	0	0	0	0	3	0	6	0	0	0	0	0	0	0	0	0	0	0	0	0	0	0	0	0	2	4	0	2	0	0	0	0	0	0	0	0	0	0	1	4	2
PACSIN2	0	1	0	0	0	0	0	1	2	0	1	1	7	5	6	0	0	1	0	0	0	0	0	0	0	0	0	0	0	1	0	0	3	1	0	0	0	0	0	0	2	3	0	0	0	0	0	0	0
PCBD1	0	1	0	0	0	0	0	0	0	0	0	0	0	0	0	0	1	0	0	0	0	0	0	0	0	0	0	0	0	0	0	0	0	0	0	0	0	0	0	0	0	0	0	0	0	0	0	0	0
PFKM	0	1	0	0	0	0	1	0	3	4	3	0	0	0	0	0	2	4	0	0	0	0	3	2	0	0	0	0	0	1	0	0	1	0	0	0	0	0	0	1	0	0	1	0	0	1	0	0	0
PPP2CB	0	1	0	0	2	0	1	3	3	0	3	2	1	1	0	1	3	4	0	0	1	2	1	3	2	0	3	1	1	1	2	0	2	0	0	0	1	1	3	1	1	1	1	3	2	0	0	0	0
PPP2R1A	0	1	0	2	4	0	3	3	5	2	5	1	1	0	1	1	2	2	0	3	2	4	1	0	2	1	1	0	2	2	1	0	2	0	0	0	0	2	2	1	1	2	6	4	3	1	0	0	1
PROCR	0	1	0	2	0	0	1	2	1	0	0	0	2	3	2	0	3	2	1	1	1	1	3	2	0	0	1	0	2	0	0	0	2	1	0	1	0	1	0	0	1	1	2	0	0	4	0	4	0
PRPF19	0	1	0	5	5	1	1	3	4	4	4	6	2	2	5	10	3	6	7	2	0	12	7	7	3	6	2	7	5	5	4	3	13	0	0	1	5	9	8	3	9	8	8	9	11	1	1	1	1
PSMA1	0	2	0	0	0	0	0	1	0	0	0	0	3	0	7	0	0	0	0	0	0	3	2	3	0	1	3	0	1	1	0	0	2	0	0	0	0	0	1	0	1	2	0	2	1	3	4	8	8
PVR	0	1	0	0	0	1	0	1	1	1	1	0	4	2	2	0	1	1	1	1	1	1	1	2	0	0	0	0	1	1	0	0	1	1	0	0	0	0	0	0	3	2	0	0	0	0	0	2	1
RAC2	0	1	1	0	0	0	0	0	0	0	0	0	0	0	0	0	0	0	0	0	0	0	0	0	0	0	0	0	3	0	0	0	0	0	0	0	0	1	0	1	0	0	0	0	0	0	0	0	0
RAC3	0	1	0	1	0	0	1	0	0	0	0	0	0	0	2	1	2	1	2	0	0	1	0	1	0	0	0	1	1	2	0	0	0	0	0	0	1	0	0	0	4	2	0	0	0	0	2	1	1
RAD23A	0	2	1	0	0	0	2	1	0	0	0	0	1	2	12	0	0	0	0	0	0	0	4	4	0	1	3	0	0	0	0	0	0	0	0	0	0	0	0	1	0	2	3	1	2	10	11	14	14
RDX	0	2	0	1	0	0	2	5	1	4	3	7	15	10	11	0	4	0	0	1	0	1	0	2	0	0	0	0	3	5	0	0	7	6	3	1	0	2	0	0	6	6	2	0	1	1	0	1	3
RPL36A	0	1	0	0	0	0	0	0	0	0	0	0	0	0	0	0	0	0	0	0	0	0	0	0	0	0	0	0	0	0	0	0	0	0	0	0	0	0	0	0	0	0	0	0	0	0	0	0	0
RPS19	0	1	0	0	0	1	0	1	0	0	0	0	1	1	1	2	0	0	0	0	0	1	0	0	0	0	0	0	1	1	0	0	0	0	0	0	1	0	0	0	0	0	0	0	0	0	0	0	0
RPS23	0	1	0	0	1	1	0	0	1	2	0	2	1	0	3	3	2	2	1	0	0	1	1	0	1	1	1	1	0	1	0	0	0	1	0	1	2	0	0	1	1	1	0	0	1	0	0	0	0
SDC2	0	1	0	0	0	0	0	0	0	0	0	0	4	2	2	0	0	0	0	1	0	0	0	1	0	0	0	0	0	0	0	0	0	4	1	3	0	0	0	0	0	1	0	0	0	0	0	0	0
SEPT2	0	1	0	4	0	1	2	0	2	4	3	0	1	1	3	1	1	3	0	0	0	2	1	2	2	1	1	3	4	5	0	0	1	0	0	0	2	1	1	0	3	2	1	3	3	0	0	0	0
SEPT7	0	1	0	0	0	0	0	3	2	2	3	0	0	0	0	1	0	2	0	0	0	0	1	4	2	1	2	0	1	0	1	0	0	0	0	0	0	1	1	1	0	0	0	2	2	0	0	0	0
SERBP1	0	1	0	1	0	0	1	1	0	1	2	1	1	1	1	0	0	0	0	1	1	1	0	0	0	0	0	0	1	0	0	0	0	0	0	0	0	1	0	0	2	1	0	0	0	0	0	0	1
SERINC3	0	1	0	1	0	0	0	1	2	0	0	0	0	0	0	1	2	1	2	2	2	0	2	1	0	0	0	0	0	0	1	1	2	4	0	1	2	2	0	1	1	1	0	0	0	1	0	0	2
SERINC5	0	1	0	0	0	0	0	0	0	0	0	1	0	0	0	0	0	0	1	0	0	1	1	1	0	0	0	0	0	1	0	0	0	1	0	0	0	0	1	0	1	1	1	1	1	1	1	1	1
SLC39A14	0	1	0	0	0	0	0	0	1	0	0	0	1	1	0	1	0	0	0	1	0	0	1	1	0	0	0	0	1	0	0	0	0	1	3	2	0	2	0	0	1	0	0	0	0	0	0	1	0
SLC9A3R1	0	1	0	0	0	0	0	5	1	2	1	1	3	6	4	0	1	0	0	2	2	0	0	1	0	0	0	0	0	1	0	0	2	1	2	2	1	1	0	0	2	2	0	0	0	0	0	0	1
SPTBN2	0	1	0	0	0	0	0	0	0	0	0	0	0	0	0	0	0	0	0	0	0	0	0	0	0	0	0	0	0	0	0	0	0	0	0	0	0	0	0	0	0	0	0	0	0	0	0	0	0
ST13	0	1	3	1	0	2	7	8	1	1	0	2	8	5	3	0	2	2	4	1	1	4	3	3	0	1	1	1	2	2	1	0	2	0	3	2	0	0	2	3	6	8	4	4	3	1	5	5	7
STAU1	0	1	0	0	0	0	0	1	0	0	0	0	2	0	0	0	0	0	0	0	0	0	0	1	0	0	0	0	0	0	0	0	1	0	0	0	0	0	0	0	1	0	0	0	0	0	0	0	0
STIP1	0	3	0	2	0	4	8	16	2	1	0	1	12	16	0	0	1	0	0	0	0	9	12	11	0	1	4	0	0	1	0	0	0	0	0	0	0	0	1	2	11	11	2	4	3	3	4	2	4
SUSD5	0	1	1	0	0	0	0	1	0	0	0	1	2	0	3	0	0	0	0	0	0	1	1	1	0	0	0	0	0	0	0	0	0	1	1	1	0	0	0	0	1	2	0	0	0	0	0	1	1
TLN2	0	1	0	0	0	0	0	0	0	0	0	0	0	0	0	0	0	0	0	0	0	0	0	0	0	0	0	0	0	0	0	0	0	0	0	0	0	0	0	0	0	0	0	0	0	0	0	0	0
TOLLIP	0	1	0	0	2	0	0	1	1	2	0	2	2	1	2	2	3	1	1	3	0	0	1	1	0	0	0	0	0	0	0	0	1	2	1	0	0	0	0	0	1	0	0	0	0	2	1	1	0
TRIM28	0	2	0	4	4	2	1	2	4	8	6	4	1	3	1	7	1	4	1	0	0	8	9	7	6	1	0	3	5	7	5	0	1	0	0	0	9	4	2	4	4	3	7	3	7	0	0	0	0
TSPAN4	0	1	0	0	0	0	1	1	0	1	1	2	0	1	0	0	1	1	1	1	0	2	2	0	0	1	0	0	0	0	0	0	1	0	0	0	0	0	0	0	2	0	0	0	0	0	0	1	0
TTLL12	0	1	0	2	2	0	0	0	2	3	5	1	1	0	0	1	3	1	0	0	0	2	4	5	0	0	0	2	3	5	0	0	0	0	0	0	1	1	0	0	2	2	1	0	0	0	0	0	0
TUBA1C	0	15	0	0	4	0	0	0	0	8	8	0	0	0	0	0	0	0	0	0	0	0	5	6	0	0	0	0	0	13	0	0	0	0	0	0	8	0	0	8	5	0	0	0	0	0	0	0	0
UPF1	0	1	0	3	0	0	0	5	3	3	2	0	7	4	3	0	2	3	0	0	1	8	5	4	0	0	1	1	5	6	4	0	2	0	0	0	1	1	2	2	6	4	3	2	3	3	2	3	2
VAMP3	0	1	0	4	2	3	4	3	4	0	2	2	3	3	5	2	2	5	5	4	2	1	1	4	1	1	1	3	1	1	1	3	4	5	8	3	1	3	4	4	2	4	0	3	2	3	2	3	3
VARS	0	1	0	4	1	2	0	1	5	10	9	4	2	3	1	4	1	9	1	0	1	9	5	9	7	1	3	7	9	10	4	2	0	0	0	0	13	4	9	8	7	7	7	11	10	0	0	0	0
VAT1	0	1	0	2	0	0	0	1	0	1	0	1	1	3	4	0	1	2	0	0	0	0	0	1	0	0	0	1	1	1	0	0	1	0	0	0	0	0	0	0	1	1	1	1	1	0	0	0	0
VCP	0	1	15	4	2	0	4	7	0	1	1	0	5	20	28	0	1	0	0	0	1	19	26	27	7	4	17	0	0	3	0	0	1	7	4	5	1	1	1	0	11	4	2	3	1	15	9	17	14
VPS35	0	1	0	2	1	0	2	7	3	4	5	4	1	2	2	0	2	4	0	1	1	4	2	1	0	0	0	1	3	3	0	1	3	0	0	0	1	2	1	0	3	4	1	4	1	1	0	0	0
WDR82	0	1	0	0	0	0	0	0	0	1	1	0	0	0	0	0	0	0	0	0	0	0	0	0	0	0	0	0	0	2	0	0	0	0	0	0	1	1	1	0	0	1	0	0	0	0	0	0	0
ADAM10	0	0	1	1	0	0	1	1	0	0	0	2	3	1	3	0	2	0	1	2	0	1	0	0	0	0	1	0	0	0	0	0	3	0	1	1	1	2	0	0	2	1	1	0	0	1	1	1	1
ANXA2P2	0	0	1	0	0	2	0	0	2	0	0	0	0	0	0	0	0	0	0	1	0	0	0	1	0	0	0	0	0	0	0	0	0	0	1	1	0	1	0	0	0	0	0	0	0	0	0	2	0
B2M	0	0	1	0	0	0	0	0	0	0	0	0	0	0	0	0	0	0	0	0	0	1	1	1	0	0	0	0	0	0	0	0	0	1	0	0	0	0	0	0	0	0	0	0	0	0	0	1	0
C4A	0	0	1	0	0	0	1	2	0	1	1	0	1	0	0	0	2	1	0	1	1	2	0	0	1	1	1	0	1	0	0	1	2	0	0	0	0	0	0	0	2	1	0	1	1	0	1	1	1
CD46	0	0	3	1	0	0	0	1	0	0	0	0	1	1	0	0	1	1	0	1	1	1	0	1	0	0	1	0	1	0	0	0	1	1	0	1	1	0	1	1	1	2	1	0	1	2	0	0	0
CLTA	0	0	1	0	0	0	0	0	1	1	1	0	1	0	0	0	0	0	0	0	0	0	0	0	0	0	0	0	0	0	0	0	0	0	0	0	0	0	0	0	0	0	0	0	0	0	1	0	1
CTPS1	0	0	1	2	2	0	0	0	1	4	5	0	0	0	1	0	0	1	0	0	0	5	2	4	0	1	0	1	4	3	0	0	0	0	0	0	6	2	2	1	2	2	1	6	4	0	0	0	0
CUEDC1	0	0	1	0	0	0	0	1	0	0	0	0	1	1	3	0	0	0	0	0	0	0	0	0	0	0	0	0	0	0	0	0	0	0	0	0	0	0	0	0	0	1	0	0	0	0	0	2	3
DEK	0	0	1	0	0	0	0	0	0	0	0	0	0	0	0	0	0	0	0	0	0	0	0	0	0	0	0	0	0	0	0	0	0	0	0	0	0	0	0	0	0	0	0	0	0	0	0	0	0
FGB	0	0	1	0	0	1	0	0	0	0	1	0	0	0	0	0	0	0	0	0	0	1	0	0	0	0	0	0	0	0	0	0	0	0	0	0	0	0	0	0	0	0	0	0	0	0	1	1	0
FRAS1	0	0	16	1	1	0	0	0	0	0	0	0	0	0	0	0	0	0	0	0	0	0	0	0	0	0	0	0	0	0	0	0	2	0	0	0	0	0	0	0	0	0	0	0	0	7	11	13	5
FTH1	0	0	1	0	0	0	0	0	0	0	0	0	0	0	0	0	1	0	1	1	0	1	0	0	1	1	1	0	0	0	0	0	0	0	0	0	0	0	0	1	0	0	0	0	0	0	1	1	0
GNA12	0	0	1	0	0	1	1	0	0	2	0	0	0	0	0	0	0	1	0	0	1	0	0	0	0	0	0	0	1	0	0	0	0	1	1	2	0	1	0	0	0	0	0	0	0	0	0	1	1
HMGB1	0	0	7	0	0	0	0	0	0	0	0	0	0	0	0	0	0	0	0	0	0	0	0	0	0	0	0	0	0	0	0	0	0	0	0	0	0	0	0	0	0	0	0	0	0	0	0	0	0
HMGB2	0	0	3	0	0	0	0	0	0	0	0	0	0	0	0	0	0	0	0	0	0	0	0	0	0	0	0	0	0	0	0	0	0	0	0	0	0	0	0	0	0	0	0	0	0	0	0	0	0
HMGCS1	0	0	1	1	2	0	1	1	3	2	0	3	0	0	0	1	0	2	1	0	0	2	2	1	0	1	0	2	2	0	0	1	3	0	0	0	1	0	3	1	4	1	0	3	3	1	1	0	0
HSPD1	0	0	1	1	0	0	5	0	0	1	0	0	0	0	0	0	0	0	0	0	0	1	0	0	0	0	0	0	0	0	0	0	1	0	0	0	0	0	5	0	1	0	0	1	2	0	1	0	0
IL23R	0	0	1	0	0	0	0	0	0	0	0	0	0	0	0	0	0	0	0	0	0	0	0	0	0	0	0	0	0	0	0	0	0	1	0	1	0	0	0	0	0	0	0	0	0	0	0	0	0
LITAF	0	0	1	0	0	0	0	0	0	0	0	0	0	0	0	0	1	0	0	0	0	0	0	0	0	0	0	0	0	0	0	0	0	1	1	1	0	0	0	0	0	0	0	0	0	0	0	0	0
LTF	0	0	1	0	0	0	1	1	0	0	0	1	1	1	1	0	1	1	0	1	1	1	0	0	0	0	1	0	0	0	0	2	0	0	0	0	1	1	0	1	0	0	0	0	0	1	1	0	1
M6PR	0	0	1	1	0	0	0	2	1	2	2	1	1	1	0	0	1	0	2	0	0	1	0	1	0	0	0	0	1	1	1	1	2	1	0	0	0	0	0	0	1	0	0	0	1	1	2	3	1
MAGED1	0	0	2	0	0	0	0	0	0	0	0	0	0	0	0	0	0	0	0	0	0	0	0	0	0	0	0	0	0	0	0	0	0	0	0	0	0	0	0	0	1	0	1	0	0	0	0	0	0
MLF2	0	0	1	0	0	0	0	2	0	0	0	0	1	1	3	0	0	0	0	0	0	2	2	4	1	1	2	0	1	4	2	1	2	1	2	3	0	1	0	1	4	3	6	2	2	3	1	3	3
MVB12B	0	0	1	3	1	2	2	3	3	2	0	5	6	4	6	2	4	2	3	8	6	4	3	1	0	0	3	0	2	1	1	1	10	1	1	1	0	1	3	1	5	4	1	3	2	4	2	5	4
NRP1	0	0	1	1	0	0	0	1	0	0	0	1	4	3	2	1	3	2	1	1	2	3	2	2	0	0	1	0	2	2	1	1	3	0	0	1	0	0	2	0	4	5	0	1	2	1	1	3	1
OCLN	0	0	1	3	1	0	2	4	2	1	2	4	9	6	7	2	3	1	1	0	1	1	4	3	0	0	1	0	1	4	1	0	2	3	0	2	0	1	3	1	3	2	0	1	2	1	0	3	1
RHOG	0	0	1	1	0	0	1	2	1	0	1	2	4	3	2	3	5	1	1	3	3	3	2	3	0	0	2	1	2	2	1	0	3	1	1	0	2	1	2	2	3	4	2	2	1	1	1	2	3
SCAMP3	0	0	3	3	6	3	2	4	2	2	2	6	7	3	6	5	3	2	4	2	2	2	2	3	0	0	0	0	4	4	2	1	4	3	2	1	1	0	5	1	2	3	1	1	0	4	2	5	4
SETX	0	0	1	0	0	0	0	0	0	0	0	0	0	0	0	0	0	0	0	0	0	0	0	0	0	0	0	0	0	0	0	0	0	1	0	1	0	0	0	0	0	0	0	0	0	0	0	0	0
SHROOM3	0	0	1	0	0	0	0	0	0	0	0	0	0	0	0	0	0	0	0	0	0	0	0	0	0	0	0	0	0	0	0	0	0	0	0	0	0	0	0	0	0	0	0	0	0	0	0	0	0
SPTAN1	0	0	58	1	12	0	0	0	0	1	0	0	0	0	0	0	0	0	0	0	0	0	0	0	0	0	0	0	0	0	0	0	2	0	0	0	0	0	0	0	0	0	0	0	0	17	11	9	9
SPTBN1	0	0	37	6	5	0	0	0	0	1	0	0	0	0	0	0	0	0	0	0	0	0	0	0	0	0	0	0	0	0	0	0	0	0	0	0	0	0	0	0	0	0	0	0	0	13	12	5	10
SSRP1	0	0	1	0	0	0	0	0	0	1	1	0	0	2	0	0	0	0	0	0	0	0	0	0	0	0	0	0	0	0	0	0	0	1	1	1	0	0	0	0	0	0	0	0	0	0	0	0	0
TF	0	0	1	0	0	0	0	0	0	0	0	0	0	0	0	0	0	0	0	0	0	0	0	0	0	0	0	0	0	0	0	0	0	0	0	0	0	0	0	0	3	0	0	0	0	0	0	0	0
THBS1	0	0	2	0	1	1	0	0	0	0	0	0	0	0	0	0	0	0	0	1	1	0	2	0	0	1	0	0	0	0	0	0	0	0	0	0	0	0	0	0	0	0	0	0	0	0	0	0	0
TLR4	0	0	17	0	0	0	0	0	0	0	0	0	0	0	0	0	0	0	0	0	0	0	0	0	0	0	0	0	0	0	0	0	0	0	0	0	0	0	0	0	0	0	0	0	0	0	0	0	0
TMC3	0	0	1	0	0	0	0	0	0	0	0	0	0	0	0	0	0	0	0	0	0	0	0	0	0	0	0	0	0	0	0	0	0	0	0	0	0	0	0	0	0	0	0	0	0	0	0	0	0
TOM1	0	0	1	1	0	0	1	3	0	0	0	0	4	3	5	0	1	0	0	1	0	1	0	1	0	0	2	0	1	0	0	0	0	0	0	0	0	0	0	0	5	4	2	3	0	3	0	3	5
TSPAN7	0	0	1	1	2	1	1	1	1	0	1	1	2	2	2	2	1	1	3	2	1	1	1	1	0	1	2	1	1	0	0	0	3	2	1	1	1	2	1	1	2	2	2	2	2	1	1	1	1
YKT6	0	0	1	0	0	0	1	1	0	0	0	0	1	1	2	0	0	0	0	0	0	0	1	1	0	0	0	0	0	0	0	0	3	1	0	0	0	0	0	1	2	1	2	0	1	3	1	3	2
AARS	0	0	0	1	1	0	0	0	3	3	1	0	0	0	1	1	2	5	0	0	0	5	3	3	0	0	0	1	2	4	1	0	0	0	0	0	2	0	3	0	1	1	0	1	3	0	0	0	0
ABCB1	0	0	0	1	0	0	0	0	0	0	0	0	0	0	0	0	0	0	0	0	0	0	0	0	0	0	0	0	0	0	0	0	0	0	0	0	0	0	0	0	0	0	0	0	0	0	0	0	0
ABCE1	0	0	0	4	2	0	1	1	2	5	5	1	0	0	1	2	2	3	0	0	0	2	5	4	2	0	1	1	1	3	5	0	3	0	0	0	5	3	4	3	6	6	4	4	6	1	0	0	0
ABCF1	0	0	0	1	0	0	0	0	0	2	2	1	0	0	0	1	0	1	0	0	0	1	1	3	0	0	0	1	0	3	0	0	0	0	0	0	2	0	1	1	0	0	1	2	1	0	0	0	0
ACACA	0	0	0	2	2	0	0	0	0	1	0	0	0	0	0	2	0	1	0	0	0	2	3	3	0	0	0	0	0	0	1	1	0	0	0	0	3	0	2	0	1	4	0	4	4	0	8	0	0
ACTN4	0	0	0	1	0	0	0	2	0	0	0	0	0	0	0	0	0	1	0	0	0	0	0	0	0	0	0	0	0	0	0	0	1	0	0	0	0	0	0	0	5	0	0	0	2	0	1	0	0
ADGRL2	0	0	0	1	0	0	0	3	0	0	0	0	2	2	1	0	0	1	0	3	3	2	2	4	0	0	2	0	1	0	1	0	4	0	1	0	0	5	2	0	2	2	0	0	0	3	0	2	3
AKR1C4	0	0	0	1	1	0	1	0	1	0	0	0	0	0	0	0	1	2	0	0	0	1	0	0	0	1	2	1	2	0	0	0	1	0	0	0	1	1	1	0	0	1	0	0	1	1	0	0	0
ALCAM	0	0	0	1	1	1	1	1	1	0	0	2	9	4	5	1	1	2	2	3	2	1	2	2	1	0	1	0	0	0	0	0	2	4	1	3	0	1	0	0	1	2	0	0	0	4	0	2	5
ALDH16A1	0	0	0	1	1	0	0	1	1	1	1	0	0	0	0	0	1	1	0	0	0	0	1	1	1	1	1	0	0	0	0	0	0	0	0	0	0	0	0	0	0	0	0	1	1	1	0	1	0
ALDH1A1	0	0	0	3	0	0	1	1	2	1	1	0	0	0	0	0	1	0	0	0	0	0	0	0	0	0	0	2	1	0	1	2	0	0	0	0	1	0	0	0	0	1	0	1	1	0	0	0	0
ALDH1L1	0	0	0	2	1	0	1	3	2	5	3	0	0	0	0	1	4	5	0	0	0	1	2	0	0	0	0	3	6	3	0	0	4	1	0	0	1	1	2	1	1	1	0	2	2	3	0	0	1
ALDH8A1	0	0	0	1	0	0	0	0	1	0	0	0	0	0	0	1	0	0	0	0	0	0	0	0	1	1	0	0	0	0	0	0	0	0	0	0	0	0	0	0	0	0	0	0	0	1	0	0	0
ALDH9A1	0	0	0	3	1	1	1	3	3	3	5	0	0	1	0	4	3	3	1	3	2	4	4	2	2	2	3	3	4	4	4	2	4	0	0	0	3	2	1	1	1	3	2	4	3	2	2	2	1
APOC1	0	0	0	1	0	0	0	0	0	0	0	1	0	0	0	0	1	0	1	0	1	1	0	1	0	1	1	0	1	0	1	1	1	1	0	0	0	1	1	1	1	1	1	1	1	0	1	1	1
ARCN1	0	0	0	3	0	0	0	0	2	2	2	0	0	0	0	0	0	3	0	0	0	2	2	2	0	0	0	1	0	2	0	0	0	0	0	0	1	0	0	0	0	1	1	1	1	0	0	0	0
ARHGDIA	0	0	0	1	0	1	1	2	2	2	3	1	2	3	1	1	0	2	0	0	0	0	1	2	0	0	0	0	2	2	0	0	1	1	0	1	0	0	1	1	1	1	1	2	2	1	2	1	1
ARHGEF39	0	0	0	1	0	0	0	0	0	0	0	0	3	0	1	0	0	0	0	1	1	0	0	0	0	0	0	0	0	0	0	0	0	0	0	0	0	0	0	0	1	0	0	0	0	0	0	0	1
ARL1	0	0	0	1	0	0	0	1	1	2	2	0	1	1	0	0	0	0	0	1	1	1	0	0	1	1	0	0	2	0	0	0	1	0	0	0	0	0	0	0	1	1	0	1	0	0	0	0	1
ATIC	0	0	0	6	6	0	1	3	6	7	9	6	2	2	2	8	6	6	0	0	0	11	8	6	2	2	1	7	11	8	0	1	2	0	0	0	6	2	5	0	9	3	2	3	2	0	0	0	1
ATP2B1	0	0	0	1	0	0	0	3	0	1	0	2	7	4	4	0	0	0	0	1	0	0	0	2	0	0	0	0	0	1	0	0	0	0	0	0	0	1	2	0	1	0	0	0	0	0	0	0	0
ATP6V1A	0	0	0	4	2	0	1	0	3	2	1	3	0	0	0	1	0	2	0	1	0	1	0	3	0	0	0	1	1	2	0	0	2	0	0	0	0	2	1	0	3	1	0	4	3	0	0	1	1
ATP6V1B2	0	0	0	1	0	0	0	0	0	0	0	1	0	0	0	0	0	0	0	0	0	0	0	0	0	0	0	0	0	0	0	0	0	0	0	0	0	0	0	0	0	0	0	0	0	0	0	0	0
BAG5	0	0	0	1	0	0	4	7	0	0	0	0	1	1	1	0	0	1	1	4	5	5	2	6	0	0	4	0	1	0	0	0	4	0	0	0	0	1	0	0	8	7	0	2	1	2	0	2	2
BCAP31	0	0	0	2	1	0	1	1	0	2	0	1	0	0	0	0	0	0	0	0	0	1	0	0	0	0	0	0	0	0	0	0	0	0	0	0	0	0	0	0	0	0	0	0	0	0	1	0	1
BHMT	0	0	0	1	1	0	1	1	0	1	1	0	0	0	0	2	1	0	0	0	1	1	0	2	1	1	1	0	2	1	0	0	1	0	0	0	1	1	2	1	1	1	1	2	2	0	0	0	0
BPGM	0	0	0	1	0	0	0	0	2	0	2	0	0	0	0	1	0	0	0	0	0	0	1	1	0	0	0	0	0	0	0	0	0	0	0	0	0	0	1	0	0	0	0	2	0	0	0	0	0
C5	0	0	0	1	0	0	0	1	0	0	0	0	0	0	0	0	0	1	0	0	0	0	1	0	1	0	0	0	0	0	0	0	0	0	0	0	0	0	1	0	0	0	0	0	0	0	0	0	0
C9	0	0	0	1	0	1	0	0	1	0	1	1	0	0	1	0	0	1	1	0	0	1	2	0	0	1	0	0	1	1	0	1	0	0	0	0	0	1	0	0	0	0	1	1	1	1	0	0	0
CAND1	0	0	0	1	0	0	1	0	1	2	2	0	0	1	0	0	1	3	0	1	0	1	0	0	1	1	1	0	1	0	0	0	0	0	0	0	0	1	0	0	1	3	0	3	1	1	0	0	0
CANX	0	0	0	1	1	0	0	0	0	1	0	1	0	0	0	0	0	0	0	2	0	0	0	0	0	0	0	0	0	0	0	0	0	0	0	0	0	0	0	0	1	0	0	0	0	0	2	2	1
CAP1	0	0	0	1	0	3	0	0	0	0	0	0	0	0	0	1	1	1	0	0	0	0	0	0	1	1	0	0	0	0	0	0	0	0	0	0	0	1	0	0	1	0	1	1	1	0	0	0	0
CAPZA1	0	0	0	4	0	0	0	2	1	0	1	2	0	2	2	1	2	2	1	1	1	1	0	0	0	0	1	0	1	3	0	0	1	0	0	0	0	1	3	0	2	0	0	1	3	0	0	0	0
CDK9	0	0	0	1	0	0	0	0	0	1	1	0	0	0	0	0	0	0	0	0	0	0	0	0	0	0	0	0	0	0	0	0	0	0	0	0	0	0	0	0	0	0	0	0	0	0	0	0	0
CHST7	0	0	0	1	0	0	0	0	0	0	0	0	0	0	0	0	0	0	0	0	0	0	0	0	0	0	0	0	0	0	0	0	0	0	0	0	0	0	0	0	0	0	0	0	0	0	0	0	0
CILP2	0	0	0	1	0	0	0	0	0	0	0	0	0	0	0	0	0	0	0	0	0	1	0	1	0	0	0	0	0	0	0	0	0	0	0	0	0	0	0	0	0	0	0	2	0	0	0	0	0
CNDP2	0	0	0	1	1	0	0	0	1	1	2	1	0	0	0	0	1	2	0	0	0	0	0	0	0	0	0	0	3	2	0	0	0	0	0	0	0	0	1	0	1	0	0	3	3	0	0	0	0
COPB2	0	0	0	1	0	0	0	0	1	1	3	0	0	0	0	2	1	0	0	0	0	1	3	0	0	0	0	0	2	3	0	0	0	0	0	0	1	0	2	0	1	1	2	3	2	0	0	0	0
COPS5	0	0	0	1	0	0	0	0	0	0	0	0	0	0	0	0	0	0	0	0	0	0	0	0	0	0	0	0	0	0	0	0	0	0	0	0	0	0	1	0	0	0	0	1	0	0	0	0	0
CORO1C	0	0	0	1	1	0	0	1	0	2	1	0	0	0	0	0	2	1	0	0	0	0	0	0	0	0	1	0	1	1	0	0	0	0	0	0	0	0	1	0	0	0	0	0	0	0	0	0	0
CP	0	0	0	2	0	0	1	0	1	1	0	0	0	0	0	0	2	1	0	0	0	1	2	2	0	0	1	0	0	0	0	0	0	0	0	0	0	0	1	1	1	1	1	1	0	0	0	0	0
CPD	0	0	0	1	0	0	0	0	0	0	0	0	0	0	0	0	0	0	0	0	0	0	0	0	0	0	0	0	0	0	0	0	0	0	0	0	0	0	0	0	0	0	0	0	0	1	0	0	0
CPNE1	0	0	0	1	1	0	0	0	0	2	0	3	1	2	2	0	1	1	0	1	1	1	0	0	0	0	1	0	1	2	1	0	1	0	0	0	1	1	0	0	2	4	1	0	0	1	0	0	0
CPSF7	0	0	0	1	0	0	0	0	0	0	2	0	0	0	0	0	0	0	0	0	0	0	1	1	0	0	0	0	1	1	0	0	0	0	0	0	1	0	0	0	0	0	1	0	0	0	0	0	0
CRISPLD1	0	0	0	1	2	0	0	1	2	3	1	2	0	0	0	2	0	2	1	0	0	2	1	1	0	0	0	0	0	0	0	0	0	0	0	0	0	0	0	0	0	0	0	0	0	0	0	0	0
CSDE1	0	0	0	2	0	0	0	1	1	1	3	0	0	0	0	0	0	2	0	0	0	3	2	3	0	0	0	0	1	2	0	0	0	0	0	0	2	0	2	0	2	0	1	2	2	0	0	0	0
CTNNB1	0	0	0	1	0	0	1	1	0	1	0	3	2	7	6	0	0	0	0	1	0	0	0	0	0	0	0	0	0	1	0	0	1	0	0	0	0	0	0	0	1	1	0	0	0	0	0	1	1
CTNND1	0	0	0	1	0	0	1	1	0	3	2	1	11	12	3	1	3	1	4	1	1	0	0	0	0	0	0	0	0	0	1	0	3	0	0	0	0	0	0	0	3	3	0	0	0	0	0	0	0
CYFIP1	0	0	0	1	0	0	1	1	0	0	1	0	2	1	1	0	1	1	0	0	0	1	1	0	0	0	0	0	0	0	1	0	2	0	0	0	0	1	0	0	0	3	1	0	0	0	0	0	1
DCTN1	0	0	0	1	1	0	0	0	2	3	1	1	0	0	0	0	0	2	0	0	0	3	2	0	0	0	0	0	2	2	0	0	0	0	0	0	0	0	2	0	0	1	1	2	3	0	0	0	0
DCTN2	0	0	0	1	0	0	0	0	0	0	1	0	0	0	0	0	0	0	0	0	0	0	0	0	0	0	0	0	0	0	0	0	0	0	0	0	0	0	0	0	0	0	0	0	0	0	0	0	0
DDX1	0	0	0	1	1	0	3	5	1	2	1	0	2	1	1	0	0	2	0	0	0	4	0	3	0	0	0	0	2	0	0	0	0	1	0	0	0	1	0	0	1	1	1	0	1	0	1	4	1
DDX17	0	0	0	2	2	1	0	1	5	7	9	2	0	0	0	4	3	5	0	0	0	4	4	2	0	0	0	6	6	7	0	3	0	0	0	0	5	0	2	0	3	4	1	3	2	0	0	0	0
DDX19A	0	0	0	2	1	0	0	0	0	2	1	0	0	0	0	0	1	1	0	0	0	1	1	3	0	0	0	0	0	0	0	0	0	0	0	0	1	0	0	0	0	0	0	0	0	0	0	0	0
DDX20	0	0	0	2	1	0	0	1	0	3	8	2	0	0	0	1	0	0	0	0	0	1	0	0	0	0	0	0	1	1	0	0	0	0	0	0	0	0	0	0	0	0	0	0	0	0	0	0	0
DDX46	0	0	0	1	0	0	0	0	0	0	0	0	0	1	0	1	0	0	0	0	0	0	1	0	0	0	0	0	1	1	0	0	0	0	0	0	0	0	0	0	0	0	0	0	0	0	0	0	0
DDX6	0	0	0	1	0	1	1	4	1	0	1	0	0	1	1	0	0	0	0	0	1	1	1	1	0	0	0	1	1	1	1	1	3	0	0	0	0	0	2	1	9	13	3	5	4	2	0	2	1
DHX15	0	0	0	1	4	0	1	1	1	10	7	3	0	0	0	1	2	4	0	1	1	7	5	3	0	0	1	3	2	5	1	3	1	0	0	0	7	1	2	2	4	4	1	6	7	0	0	0	1
DHX30	0	0	0	1	0	0	0	1	0	0	0	0	1	0	0	0	0	0	0	0	0	0	0	0	0	0	0	0	0	0	0	0	0	0	0	0	0	0	0	0	0	0	0	0	0	1	0	1	0
DIP2B	0	0	0	1	2	0	0	2	0	1	0	5	5	4	7	1	1	0	3	5	1	0	0	0	0	0	0	0	0	0	0	0	2	0	0	0	0	0	0	0	2	0	0	0	0	0	0	0	2
DNM1L	0	0	0	3	1	1	0	0	4	3	5	1	0	1	0	0	4	3	0	0	0	2	0	3	0	0	0	1	2	2	0	0	0	0	0	0	0	0	1	0	1	3	0	3	3	0	0	0	0
DPYD	0	0	0	1	0	0	0	0	0	0	0	0	0	0	0	0	0	0	0	0	0	0	0	0	0	0	0	0	0	0	0	0	0	0	0	0	0	0	0	0	0	0	0	0	0	0	0	0	0
DPYSL2	0	0	0	4	1	0	0	0	2	4	4	0	0	0	0	0	3	3	0	0	0	5	2	2	2	0	2	2	4	2	0	0	0	0	0	0	0	0	2	0	2	2	1	2	3	0	0	0	0
EEF1B2	0	0	0	1	1	1	1	1	0	2	3	1	0	0	1	2	2	0	0	0	0	1	0	1	0	0	0	1	1	1	0	0	0	0	0	0	0	0	1	0	1	0	0	2	0	0	0	0	0
EEF1D	0	0	0	2	1	0	0	1	2	1	1	0	2	2	1	3	0	2	0	0	0	1	1	1	0	0	0	0	0	2	0	0	0	0	0	0	1	0	1	0	1	2	0	2	2	0	0	0	0
EEF1E1	0	0	0	1	1	1	1	1	2	2	2	2	0	0	1	1	2	2	1	0	1	2	1	3	1	0	1	1	2	2	1	1	1	1	0	0	1	1	0	1	0	1	1	1	1	1	1	0	1
EGFL7	0	0	0	1	0	0	0	0	0	1	0	0	0	0	0	0	0	0	0	0	0	0	1	0	0	0	0	0	0	1	0	0	0	0	0	0	0	0	0	0	1	0	0	0	0	0	0	0	0
EHD3	0	0	0	3	1	3	1	1	0	0	1	0	0	0	0	1	1	1	0	0	0	0	1	0	0	4	0	0	1	0	0	0	1	0	0	0	0	4	2	0	1	0	0	1	3	1	0	0	0
EIF2S1	0	0	0	2	2	0	0	0	0	2	2	0	1	0	1	1	2	3	0	0	0	1	2	1	0	1	0	1	1	1	0	0	0	0	0	0	1	0	0	0	0	0	0	1	1	0	1	0	0
EIF3D	0	0	0	1	2	0	0	0	1	2	0	1	0	1	0	1	0	0	0	0	0	1	0	1	0	0	0	1	1	2	0	0	0	0	0	0	0	0	0	0	0	0	0	0	0	0	0	0	0
EIF4A2	0	0	0	1	0	0	1	0	0	1	0	0	0	0	0	0	1	0	0	0	0	0	0	0	0	0	1	0	0	0	0	0	0	0	0	0	0	0	0	0	0	0	0	2	1	0	0	0	0
EIF6	0	0	0	1	0	0	0	0	1	1	1	0	0	0	1	0	0	1	0	0	0	0	0	0	0	0	0	0	0	0	0	0	0	0	0	0	1	0	0	0	0	0	0	0	0	0	0	0	0
ENO3	0	0	0	1	0	0	0	0	0	0	0	0	0	0	0	0	0	0	0	0	0	0	0	0	0	0	0	0	0	0	0	0	0	0	0	0	0	0	0	0	1	0	0	0	0	0	0	0	0
ENPP1	0	0	0	1	0	0	0	0	0	0	0	0	2	1	0	0	1	0	2	2	3	1	0	1	0	0	3	0	0	0	1	0	2	1	0	0	1	4	1	0	1	1	1	0	0	1	0	1	1
EPHA4	0	0	0	1	0	0	0	2	0	0	0	0	0	0	0	0	0	0	0	0	0	1	0	0	0	0	0	0	0	0	0	0	1	0	0	0	0	0	0	0	0	1	0	0	0	0	0	1	0
EXT2	0	0	0	1	1	0	0	0	0	0	0	0	0	0	0	0	0	0	0	0	0	0	0	0	0	0	0	0	0	0	0	0	0	0	0	0	0	0	0	0	0	0	0	0	0	0	0	0	0
FAM129A	0	0	0	1	0	0	0	0	0	0	0	0	0	0	0	0	0	0	0	0	0	0	0	0	0	0	0	0	1	0	0	0	0	0	0	0	0	0	0	0	0	0	0	0	0	0	0	0	0
FAM234A	0	0	0	1	0	0	0	0	0	0	0	0	1	0	0	0	0	0	0	0	0	1	0	1	0	0	0	0	0	0	0	0	0	0	0	0	1	0	1	0	1	1	0	0	0	0	0	1	1
FARSB	0	0	0	1	0	0	1	0	3	2	5	0	1	1	0	2	2	3	0	0	0	3	4	4	1	0	0	1	3	2	1	0	0	0	0	0	2	0	1	1	2	1	1	1	1	0	0	0	0
FERMT3	0	0	0	1	0	0	2	4	3	1	2	2	0	0	0	0	4	4	0	0	0	2	3	1	1	2	2	2	1	1	1	0	1	0	0	0	1	0	2	0	1	1	1	2	3	0	1	0	0
FKBP4	0	0	0	1	1	1	1	7	0	0	0	0	3	3	1	0	0	0	0	0	0	1	1	1	0	0	0	0	0	0	0	0	0	0	0	0	0	0	0	0	2	2	0	1	0	0	1	0	0
FLVCR1	0	0	0	2	0	0	0	1	1	0	1	1	5	4	5	2	1	2	1	0	2	1	1	1	0	0	1	0	1	1	1	0	3	0	0	0	2	2	2	0	1	2	0	1	0	0	0	2	2
FSCN1	0	0	0	2	0	0	1	1	2	2	2	0	0	0	0	0	0	1	0	0	0	1	0	0	0	1	0	0	0	1	0	0	1	0	0	0	0	0	0	0	1	1	1	1	2	0	0	0	0
GAL	0	0	0	2	0	1	0	0	2	1	2	2	0	0	0	1	0	1	1	0	0	1	1	1	1	2	0	1	2	0	1	0	2	0	0	0	1	2	0	0	0	1	0	0	1	1	0	1	1
GANAB	0	0	0	2	3	0	1	0	1	4	2	3	0	0	0	0	3	4	0	1	2	6	5	3	0	1	0	0	3	3	1	1	3	0	0	0	0	1	3	0	1	2	2	3	4	1	0	0	1
GAS7	0	0	0	1	0	0	0	0	1	0	0	1	0	0	0	0	1	1	0	0	0	0	0	1	0	0	0	0	0	0	0	0	0	0	0	0	0	0	0	0	0	0	0	0	0	0	0	0	0
GBA	0	0	0	1	1	0	0	0	0	0	0	0	0	0	0	0	0	1	0	0	0	4	0	0	0	0	0	0	2	0	0	0	0	0	0	0	0	0	0	0	1	0	1	1	1	0	0	0	0
GEMIN5	0	0	0	1	0	0	0	0	0	0	3	0	0	0	0	0	0	0	0	0	0	0	0	0	0	0	0	0	0	0	0	0	0	0	0	0	0	0	0	0	0	0	0	0	0	0	0	0	0
GJA1	0	0	0	1	2	0	1	2	1	1	0	3	3	2	4	0	1	1	1	5	4	1	1	1	0	0	1	0	0	1	0	0	3	0	0	0	0	0	0	0	0	0	0	0	0	1	0	2	2
GLIPR2	0	0	0	1	0	1	1	1	0	0	0	1	1	2	2	1	1	0	1	0	0	2	0	2	0	0	0	1	2	0	1	0	2	0	2	0	0	2	2	0	1	2	1	0	1	0	0	1	1
GMPS	0	0	0	2	1	0	0	0	0	2	5	1	0	0	0	3	1	3	0	0	0	3	3	6	0	0	0	1	2	4	1	0	0	0	0	0	2	0	1	0	1	0	1	2	1	0	0	0	0
GNA14	0	0	0	2	1	0	0	2	1	0	2	1	0	0	0	0	0	0	0	1	0	2	0	1	1	0	1	1	1	1	1	0	2	1	2	2	0	2	0	0	1	2	1	0	0	0	0	0	1
GNAQ	0	0	0	2	0	0	0	0	0	1	0	2	3	3	4	0	0	0	0	0	0	1	1	1	0	0	0	0	0	0	0	0	0	0	0	0	0	1	2	0	0	2	0	0	0	0	0	0	0
GNB4	0	0	0	3	0	0	0	1	0	0	0	0	0	2	4	0	0	0	0	0	0	0	0	0	0	0	0	0	0	0	0	0	0	0	0	0	0	0	0	0	0	0	0	0	0	0	0	0	0
GOLGA7	0	0	0	1	1	0	0	0	0	0	0	0	2	1	1	2	1	2	2	0	0	0	2	0	0	0	0	0	2	1	0	0	2	1	2	1	0	0	2	0	2	0	0	0	0	0	0	1	1
GPRC5B	0	0	0	1	0	0	0	1	0	0	0	1	2	2	1	0	0	0	0	1	0	0	0	0	0	0	0	0	0	0	0	1	0	0	0	0	0	0	0	0	0	0	0	0	0	0	0	1	0
GRK5	0	0	0	1	0	0	0	1	0	1	0	0	0	1	0	0	0	0	0	0	0	0	0	0	0	0	0	0	0	0	0	0	0	0	0	1	0	0	0	0	0	0	0	0	0	0	0	0	0
GRWD1	0	0	0	1	1	0	0	0	1	1	0	0	0	0	0	0	0	1	0	0	0	3	3	2	0	0	0	0	1	2	0	0	0	0	0	0	2	0	1	0	1	0	0	1	1	0	0	0	0
GSTA1	0	0	0	1	0	0	0	0	0	0	1	0	0	0	0	0	0	1	0	0	0	0	0	0	0	0	0	0	0	1	0	0	0	0	0	0	0	0	0	0	0	0	0	1	0	0	0	0	0
HDAC1	0	0	0	1	1	0	0	1	1	3	2	0	0	1	0	2	1	2	0	0	0	2	4	0	0	0	0	1	1	2	0	0	0	0	0	0	0	0	0	0	0	0	0	0	0	0	0	0	0
HGS	0	0	0	2	0	1	4	4	1	1	0	4	2	5	3	0	5	2	0	1	0	0	0	0	0	0	0	0	1	0	0	0	3	0	0	0	0	0	0	0	0	0	0	0	0	0	2	0	1
HNRNPA0	0	0	0	2	0	0	0	1	3	3	4	2	2	1	1	1	2	3	0	0	1	2	1	1	2	0	0	1	2	2	2	1	1	0	0	0	2	0	2	2	2	0	0	3	3	0	0	0	1
HNRNPD	0	0	0	2	1	0	0	0	0	1	0	0	0	0	0	1	0	0	0	0	0	0	0	0	0	0	0	0	0	0	0	0	0	0	0	0	0	0	0	0	0	0	0	0	0	0	0	0	0
HNRNPF	0	0	0	3	0	0	0	0	0	0	0	0	0	0	0	0	0	0	0	0	0	0	0	0	0	0	0	0	0	0	0	0	0	0	0	0	0	0	0	0	0	0	0	0	0	0	0	0	0
HNRNPH3	0	0	0	1	0	0	0	0	0	1	0	0	0	0	0	0	0	0	0	0	0	0	1	1	0	0	0	0	0	1	0	0	0	0	0	0	0	0	0	0	2	0	0	0	0	0	0	1	0
HNRNPL	0	0	0	1	2	0	0	1	3	5	5	3	0	1	1	6	1	2	0	0	0	4	3	2	1	0	0	0	7	10	0	0	0	0	0	0	2	1	0	0	1	0	1	2	1	0	0	0	0
HNRNPUL1	0	0	0	2	1	0	0	0	4	8	6	1	0	2	0	3	0	1	0	0	0	1	3	3	0	0	0	1	3	4	0	0	0	0	0	0	0	0	1	0	0	1	0	2	1	0	0	0	0
HS3ST3B1	0	0	0	1	0	0	0	0	0	0	0	0	0	0	0	0	0	0	0	0	0	0	0	1	0	0	0	0	1	1	0	0	0	0	0	0	0	0	0	0	0	0	0	0	0	0	0	0	0
HS6ST2	0	0	0	1	2	0	2	1	1	1	1	1	0	0	0	1	1	3	2	0	0	1	2	0	1	0	0	0	3	1	0	0	0	1	0	1	1	1	1	0	0	0	1	1	0	2	0	1	0
HSP90B1	0	0	0	1	1	0	1	0	0	0	0	1	0	0	0	0	0	0	0	0	0	0	0	0	0	0	0	0	0	0	0	0	0	0	0	0	0	0	0	0	1	0	0	0	0	1	0	0	2
HSPA4	0	0	0	1	0	0	0	6	5	2	2	4	1	1	2	0	1	5	0	0	0	6	6	5	2	1	0	0	3	3	0	0	1	0	0	0	1	1	3	0	5	5	0	7	5	0	0	0	0
IARS	0	0	0	4	5	3	2	5	13	11	13	9	0	0	0	8	8	11	1	0	0	15	9	12	6	2	1	7	4	6	3	2	4	0	0	0	14	6	8	5	6	4	14	12	14	2	0	0	3
IDH1	0	0	0	1	0	0	0	0	0	0	0	0	0	0	0	2	0	0	0	0	0	0	0	0	0	0	1	0	0	0	0	0	0	0	0	0	0	0	0	0	0	0	0	1	0	0	0	0	0
IGSF3	0	0	0	1	0	0	0	2	0	0	0	0	3	1	2	0	2	0	0	0	1	5	4	4	0	0	3	0	1	0	0	0	3	0	2	5	0	4	4	0	6	2	1	0	1	3	1	3	2
IPO5	0	0	0	1	0	0	0	1	1	2	0	0	0	0	0	0	0	0	0	1	1	0	0	0	1	0	0	0	0	0	0	0	0	0	0	0	0	1	0	0	0	1	1	2	2	0	0	0	0
IQGAP1	0	0	0	1	0	0	0	2	1	2	1	0	1	0	1	0	0	1	0	0	0	0	0	0	0	0	0	0	0	0	0	0	0	0	0	0	0	0	0	0	1	0	0	0	1	0	0	0	0
ITGA4	0	0	0	1	0	0	0	0	1	0	0	0	3	0	0	0	1	2	1	5	2	2	2	1	0	0	2	0	1	0	2	0	1	1	3	1	3	2	2	0	4	2	1	0	0	0	0	3	2
ITSN2	0	0	0	1	0	0	0	0	1	0	0	0	0	0	0	0	0	0	0	0	0	0	0	1	0	0	0	0	0	0	0	0	0	0	0	0	0	0	0	0	0	0	0	0	0	0	0	0	0
KARS	0	0	0	1	0	0	0	0	3	1	0	0	0	0	0	1	0	0	0	0	0	1	2	2	0	0	0	0	1	0	0	0	0	0	0	0	3	0	1	0	0	0	0	1	3	0	0	0	0
KCMF1	0	0	0	1	0	0	0	0	0	0	1	0	0	0	0	0	0	0	0	0	0	0	0	0	0	0	0	0	0	0	0	0	0	0	0	0	0	0	0	0	0	0	0	0	0	0	0	0	0
KHDRBS1	0	0	0	3	2	0	1	0	2	3	3	3	1	1	1	5	2	6	0	0	0	1	3	3	1	0	0	1	3	5	0	0	0	0	0	0	2	2	1	0	2	1	2	2	2	0	0	0	0
KLHL8	0	0	0	1	0	0	0	0	0	0	0	0	2	0	1	0	0	0	0	0	0	0	0	0	0	0	0	0	0	1	0	0	2	2	1	2	0	1	0	0	0	0	0	0	0	0	0	0	0
KRT13	0	0	0	1	0	0	0	0	0	0	0	0	0	0	0	0	0	0	0	0	0	0	0	0	0	0	0	0	0	0	0	0	0	0	0	0	0	0	0	0	0	0	0	0	0	0	0	0	0
KRT17	0	0	0	2	0	0	0	0	0	0	0	0	0	0	0	0	0	0	0	0	0	0	0	0	0	0	0	0	0	0	0	0	2	0	0	0	0	0	7	0	14	0	0	4	7	0	0	0	0
KRT4	0	0	0	5	0	0	0	0	0	0	0	0	0	0	0	0	0	0	0	0	0	0	0	0	0	0	0	0	0	0	0	0	0	0	0	0	0	0	0	0	0	0	0	0	0	0	0	0	0
KRT72	0	0	0	1	0	0	1	0	0	0	0	0	0	1	0	0	0	0	0	0	0	0	0	0	0	0	0	0	0	0	0	0	0	0	1	1	0	0	1	0	1	0	0	1	1	0	0	0	0
KRT77	0	0	0	1	0	0	0	0	0	0	0	0	0	0	0	0	0	0	0	0	0	0	0	0	0	0	0	0	0	0	0	0	1	0	0	0	0	0	0	0	0	0	0	0	0	0	0	0	0
LCK	0	0	0	1	0	0	0	0	0	0	0	0	0	0	0	0	0	0	1	0	0	0	0	0	0	0	0	1	0	0	1	0	0	0	1	0	0	0	0	1	0	0	0	0	0	1	1	0	1
LCP2	0	0	0	41	0	0	0	0	0	0	0	0	116	0	0	0	0	0	0	0	0	0	0	0	0	0	0	0	0	0	0	0	0	0	0	0	0	0	0	0	0	0	0	0	0	0	0	0	0
LRP1	0	0	0	1	1	0	0	0	0	0	0	0	0	0	0	0	0	0	0	0	0	2	2	0	0	0	0	0	1	0	0	0	0	0	0	0	0	0	1	0	1	1	1	3	4	0	0	0	0
LSM12	0	0	0	1	0	0	0	0	0	0	0	0	0	0	0	0	0	0	0	0	0	0	0	0	0	0	0	0	0	0	0	0	0	0	0	0	0	0	0	0	0	1	0	0	0	0	0	0	0
LTBP1	0	0	0	1	2	0	0	0	2	3	4	2	0	0	0	3	0	0	0	0	0	1	1	5	0	0	0	1	0	0	0	0	0	0	0	0	1	0	0	0	1	1	0	5	4	0	0	2	0
LYN	0	0	0	1	0	0	1	0	0	0	0	1	5	4	3	1	3	0	4	1	0	2	1	2	0	0	0	0	1	2	0	0	1	1	3	1	0	1	0	0	3	3	0	0	0	1	0	2	0
MAGED2	0	0	0	1	0	0	0	0	1	0	0	0	2	0	2	0	0	1	0	0	0	0	1	0	0	0	0	0	0	0	0	0	0	0	0	0	0	0	0	0	0	0	0	0	0	0	0	0	0
MAP4K4	0	0	0	1	0	0	0	0	0	0	0	2	3	1	0	0	0	0	0	4	3	0	0	0	0	0	1	0	0	1	0	0	1	0	0	0	0	0	0	0	1	2	0	0	0	0	0	0	0
MAT1A	0	0	0	1	1	1	0	0	1	1	1	1	0	0	0	1	0	1	0	1	1	1	0	1	1	1	1	0	1	1	1	1	0	0	0	0	1	1	1	0	1	2	1	1	1	1	0	0	0
MAT2A	0	0	0	1	2	0	0	1	2	3	3	0	0	0	0	3	1	3	0	0	0	2	3	1	2	0	0	2	2	3	0	0	2	0	0	0	2	1	2	0	1	0	1	2	2	0	0	0	0
MCM3	0	0	0	1	3	0	0	1	3	3	7	2	1	2	1	2	1	2	0	0	0	3	1	3	2	0	0	2	3	3	1	1	2	0	0	0	4	1	0	1	0	0	1	0	1	0	0	0	0
MCM5	0	0	0	3	1	0	0	1	2	8	8	1	0	1	0	2	1	4	2	0	0	1	2	3	1	0	0	1	3	2	0	0	0	0	0	0	4	2	1	2	1	0	1	1	1	0	0	0	0
MCM6	0	0	0	1	0	0	0	1	3	5	5	0	0	0	1	2	0	1	0	0	0	1	2	3	1	0	0	0	2	3	0	0	0	0	0	0	3	1	1	0	2	2	2	1	1	0	0	0	0
MITD1	0	0	0	1	0	0	0	3	0	0	0	0	0	0	0	0	1	1	5	5	5	6	6	4	0	0	5	0	1	0	1	0	5	0	3	2	1	5	3	1	3	3	4	2	3	5	5	3	3
MPST	0	0	0	2	0	0	0	0	0	0	1	0	0	0	0	2	0	0	0	0	0	1	0	0	0	0	0	0	1	0	0	0	0	0	0	0	0	0	1	0	0	0	0	1	1	0	0	0	0
MSH2	0	0	0	1	2	0	0	0	2	4	4	2	0	0	0	1	0	1	0	0	0	3	0	4	0	0	0	1	3	2	0	0	0	0	0	0	2	0	0	0	0	2	1	0	1	0	0	0	0
MSH6	0	0	0	1	0	0	0	0	1	2	1	0	0	0	0	0	0	0	0	0	0	3	0	1	2	0	0	0	0	1	0	0	0	0	0	0	2	0	0	1	0	1	1	1	1	0	0	0	0
MTAP	0	0	0	1	0	0	0	1	1	1	1	0	0	0	1	0	1	1	0	0	0	1	1	1	0	0	0	0	1	1	0	0	0	0	0	0	0	0	1	0	1	0	0	1	1	0	0	0	0
MYADM	0	0	0	1	0	0	0	1	0	0	0	0	1	0	0	0	0	1	0	0	2	0	0	0	0	0	0	0	0	1	0	0	2	0	0	0	0	1	1	0	1	1	0	1	1	0	0	0	0
NAA15	0	0	0	1	0	0	0	0	0	3	2	0	0	0	0	0	0	2	0	0	0	4	0	1	0	0	0	0	0	3	0	0	0	0	0	0	1	0	0	0	2	0	0	0	0	0	0	0	0
NANS	0	0	0	1	0	1	0	1	2	3	3	2	0	1	0	3	0	0	0	0	0	1	1	2	0	0	0	2	2	1	0	1	0	0	0	0	1	1	0	1	0	3	0	2	2	1	0	0	0
NARS	0	0	0	1	0	0	0	0	1	1	1	1	0	0	0	0	1	1	0	0	0	0	0	0	0	0	0	0	1	0	0	0	0	0	0	0	0	0	0	0	0	0	0	0	0	0	0	0	0
NAT1	0	0	0	1	0	0	0	0	1	1	2	0	0	0	0	0	0	0	0	0	0	0	0	0	1	0	1	0	0	0	0	0	1	0	0	0	0	0	0	0	0	0	0	1	1	0	0	0	0
NCAM1	0	0	0	1	0	0	0	2	0	0	0	0	1	2	2	0	0	0	0	0	1	0	0	2	0	0	0	0	0	0	0	0	0	0	0	0	0	0	0	0	1	0	0	0	0	0	0	0	0
NCAPD2	0	0	0	1	0	0	0	1	1	3	2	0	0	0	0	0	0	0	0	0	0	1	0	0	1	0	0	0	0	1	0	0	0	0	0	0	0	0	0	0	0	2	1	1	1	0	0	0	0
NEDD4L	0	0	0	2	0	0	0	2	0	0	0	2	3	3	1	1	3	1	2	0	1	0	0	0	0	0	0	0	1	0	0	0	3	0	0	0	0	0	0	0	1	4	0	0	0	2	1	3	1
NME1	0	0	0	1	0	0	0	5	0	1	0	1	1	0	3	0	0	0	0	1	1	0	0	1	0	0	0	0	0	2	0	0	3	0	0	0	0	0	0	0	2	0	0	0	0	1	1	2	2
NME2P1	0	0	0	1	1	0	1	1	0	0	0	0	0	0	0	0	1	2	0	0	0	1	1	0	0	0	0	0	0	0	0	0	0	0	1	0	0	0	2	0	0	1	0	1	1	0	0	1	1
NMT1	0	0	0	2	3	0	0	0	3	4	4	0	0	2	0	1	0	4	0	0	0	5	0	4	2	0	0	1	3	2	0	1	0	0	0	0	2	1	2	0	3	3	2	2	2	0	0	0	0
NOP2	0	0	0	1	0	0	0	0	0	2	4	2	0	0	0	2	0	2	0	0	0	2	4	3	0	0	0	3	2	3	1	0	0	0	0	0	2	0	0	4	1	1	1	2	0	0	0	0	0
NOP58	0	0	0	1	0	0	0	0	1	1	2	0	0	0	0	1	0	1	0	0	0	4	1	2	1	0	0	0	1	4	0	0	0	0	0	0	3	0	1	1	2	0	0	5	3	0	0	0	0
NOTCH2	0	0	0	2	0	0	0	0	0	0	0	1	4	1	2	2	4	3	1	4	3	1	1	2	0	0	0	1	3	3	2	0	7	0	3	1	1	4	3	0	6	4	0	0	0	8	5	7	11
NPEPPS	0	0	0	1	0	0	0	0	0	0	0	0	0	0	0	0	0	0	0	0	0	0	0	0	0	0	0	0	0	0	0	0	0	0	0	0	0	0	0	0	0	0	0	0	0	0	0	0	0
NSF	0	0	0	2	1	0	0	0	3	3	5	0	0	1	0	1	2	1	0	0	0	1	1	4	0	0	0	2	2	2	0	0	0	0	0	0	1	1	0	0	2	0	2	2	0	0	0	0	0
P3H1	0	0	0	1	0	0	0	1	0	1	0	0	0	0	0	0	0	0	0	0	0	1	2	1	1	0	0	0	1	0	0	0	0	0	0	0	0	0	1	0	0	0	0	2	0	0	0	0	0
PA2G4	0	0	0	1	0	1	0	2	0	4	1	0	0	0	0	0	1	1	0	0	0	1	1	3	0	0	0	0	1	1	0	0	0	0	0	0	0	0	1	0	1	1	0	0	1	0	0	0	0
PACSIN3	0	0	0	1	1	0	0	2	1	3	2	4	6	5	6	2	1	2	0	1	1	1	0	0	0	0	0	0	1	4	0	0	2	0	0	0	0	0	2	0	0	1	0	0	0	1	0	1	1
PAK4	0	0	0	1	0	0	0	0	0	0	0	0	3	1	0	0	0	0	0	0	1	1	0	1	0	0	0	0	1	0	0	0	2	0	0	0	0	2	0	0	5	3	1	0	1	0	0	0	1
PARVB	0	0	0	2	0	0	0	0	2	1	1	0	0	0	0	0	3	2	0	0	0	0	0	1	1	0	1	2	2	1	0	0	2	0	0	0	1	1	1	1	3	3	1	4	3	0	0	1	0
PBLD	0	0	0	1	1	0	1	0	0	0	0	0	0	0	0	0	1	0	0	0	0	0	0	0	0	0	0	0	1	0	0	0	0	0	0	0	0	0	1	0	0	0	0	1	1	0	0	0	0
PCMT1	0	0	0	1	0	0	0	0	0	0	0	1	1	0	1	0	0	0	0	0	0	0	0	0	0	0	0	0	0	0	0	0	0	0	0	0	0	0	0	0	0	0	0	0	0	0	1	0	0
PFKP	0	0	0	2	3	0	0	0	2	2	2	0	0	0	0	0	0	1	0	0	0	0	2	3	0	0	0	1	1	2	1	0	0	0	0	0	0	0	1	0	0	1	0	3	3	0	0	0	0
PGAM1	0	0	0	2	0	0	2	4	3	3	4	6	0	0	0	0	2	0	0	0	0	1	0	3	0	1	1	0	0	0	0	0	0	0	0	0	1	0	1	0	1	1	1	3	1	1	0	0	0
PGD	0	0	0	1	1	0	2	2	2	2	1	1	1	0	0	1	2	2	0	3	2	2	2	1	1	2	1	0	4	3	0	0	0	0	0	0	1	1	0	1	2	2	1	2	2	0	0	1	1
PGM1	0	0	0	6	4	0	2	6	1	2	1	3	0	0	0	3	3	3	0	1	1	0	3	1	0	0	1	1	4	2	0	0	1	0	0	0	0	1	1	0	1	1	2	1	2	0	0	0	0
PGRMC1	0	0	0	1	1	0	0	2	0	1	0	0	0	0	0	0	0	0	0	0	0	0	0	0	0	0	0	0	0	1	0	0	0	0	0	0	0	0	0	0	0	0	0	0	0	0	0	0	0
PIP	0	0	0	1	0	0	0	0	0	0	0	0	0	0	0	0	0	0	0	0	0	0	0	0	0	0	0	0	0	0	0	0	0	0	0	0	0	0	0	0	0	0	0	0	0	0	0	0	0
PKLR	0	0	0	2	0	0	0	0	0	1	0	0	0	0	0	2	0	0	0	0	0	1	0	0	0	0	0	0	0	0	0	0	0	0	0	0	0	0	0	0	0	0	0	0	0	0	0	0	0
PLSCR1	0	0	0	1	1	0	1	0	0	1	0	0	0	0	0	0	1	0	2	1	0	2	0	1	0	0	0	0	1	0	0	0	1	0	2	0	0	0	0	0	2	2	0	0	0	1	0	0	1
PNP	0	0	0	1	0	0	0	1	0	1	1	1	0	0	0	0	0	0	0	0	0	0	1	1	0	0	0	1	0	1	0	0	0	0	0	0	0	0	0	0	1	0	0	1	1	1	0	0	0
POLR2B	0	0	0	3	0	0	0	0	1	1	5	2	0	0	0	1	0	0	1	0	0	0	0	1	0	0	0	0	1	4	1	0	0	0	0	0	0	0	2	1	0	2	1	5	0	0	0	0	0
PPP1CB	0	0	0	1	0	0	0	0	1	0	1	0	0	0	0	0	0	0	0	0	0	0	1	2	0	0	0	0	0	0	0	0	0	0	0	0	0	0	1	0	5	0	1	1	0	0	0	0	0
PPP2R2A	0	0	0	2	0	0	0	1	0	1	1	0	0	0	0	1	0	0	0	0	0	0	0	1	0	0	0	1	1	1	0	0	0	0	0	0	0	0	0	0	0	1	0	1	2	0	0	0	0
PRKAR2A	0	0	0	4	2	0	1	1	3	3	6	3	0	0	0	2	1	0	0	0	0	1	1	3	1	0	1	0	2	3	0	0	1	0	0	0	0	0	1	0	0	0	0	1	2	0	0	0	0
PRKD3	0	0	0	1	0	0	0	0	0	0	0	0	0	0	0	0	0	0	0	0	0	0	0	0	0	0	0	0	0	0	0	0	0	0	0	0	0	0	0	0	0	0	0	0	0	0	0	0	0
PRPF8	0	0	0	1	1	0	0	0	1	1	1	1	0	1	0	1	0	0	0	0	0	4	1	3	0	0	0	0	0	1	0	0	0	0	0	0	0	0	0	0	2	2	1	2	1	0	0	0	0
PRPS1L1	0	0	0	1	1	0	0	0	0	1	0	2	0	0	0	0	1	1	0	0	0	0	0	1	0	0	0	0	0	0	0	0	0	0	0	0	0	0	0	0	0	0	0	0	0	0	0	0	0
PRPSAP2	0	0	0	1	0	0	0	0	0	1	0	0	0	0	0	1	0	0	0	0	0	1	0	0	0	0	0	0	0	0	0	0	0	0	0	0	0	0	0	0	0	0	0	0	0	0	0	0	0
PRSS23	0	0	0	1	1	0	1	0	0	1	0	0	0	0	0	0	1	0	0	0	0	1	1	1	0	0	0	0	0	0	0	0	0	0	0	0	0	0	0	0	1	0	0	1	0	0	0	1	0
PSAT1	0	0	0	1	1	0	1	2	2	0	0	1	1	0	0	1	0	1	0	0	0	0	0	0	0	1	0	0	2	1	0	0	0	0	0	0	0	0	1	0	0	0	1	0	0	2	0	0	1
PSMA3	0	0	0	1	0	0	0	0	0	0	0	0	0	0	2	0	0	0	0	0	0	2	1	1	0	0	1	0	0	1	0	0	0	0	0	0	0	0	1	0	0	1	1	3	1	5	3	4	6
PSMD12	0	0	0	4	3	0	2	1	6	8	8	2	0	0	2	2	2	6	2	1	1	6	11	7	3	1	3	2	3	5	1	1	6	1	0	0	5	3	3	5	6	5	4	7	6	2	4	4	10
PSMD13	0	0	0	4	5	0	0	1	7	7	9	1	0	0	2	2	3	7	1	2	2	6	5	6	5	3	1	3	3	2	3	1	5	0	0	0	3	3	3	2	6	5	3	7	6	5	4	10	12
PSMD14	0	0	0	6	2	0	0	0	2	4	4	0	0	0	1	2	0	1	0	1	1	2	2	2	1	1	1	0	4	6	1	0	2	0	0	0	2	2	3	1	3	3	3	2	3	7	1	1	4
PSMD5	0	0	0	1	0	1	0	0	0	1	1	0	0	0	0	1	1	1	0	1	1	0	1	1	2	1	1	0	1	1	1	1	0	0	0	0	1	1	1	1	0	1	1	0	0	1	0	1	0
PSMD6	0	0	0	3	3	0	1	2	1	4	5	6	1	0	4	1	6	5	0	0	2	6	10	6	2	1	2	4	3	8	1	1	3	0	0	0	1	3	3	3	6	5	7	4	5	7	4	9	6
PSMD8	0	0	0	1	1	0	0	0	1	2	3	0	0	0	0	0	0	0	0	0	0	3	1	1	1	0	1	1	1	0	0	0	0	0	0	0	1	0	1	1	0	0	1	1	1	2	1	3	2
PTGR1	0	0	0	1	1	0	0	0	1	0	0	0	0	0	0	0	0	1	0	0	0	0	0	0	0	0	0	0	0	0	0	0	0	0	0	0	0	0	0	0	0	0	0	1	1	0	0	0	0
PTK7	0	0	0	3	0	0	1	2	0	1	0	4	3	4	2	2	7	2	3	2	2	2	5	5	0	0	0	0	3	2	0	0	5	1	9	6	3	5	2	0	2	5	0	0	1	2	0	3	2
PTPRS	0	0	0	2	0	0	0	2	0	0	0	0	2	1	1	0	0	1	0	3	0	5	0	6	0	0	6	0	2	0	1	0	1	0	1	0	0	1	0	0	8	7	1	0	0	4	0	8	7
QSOX1	0	0	0	1	0	0	0	0	0	0	0	0	0	0	0	0	0	0	0	0	0	0	0	0	0	0	0	0	0	0	0	0	0	0	0	0	0	0	0	0	0	0	0	0	0	0	0	0	0
RAB14	0	0	0	2	0	0	1	3	1	1	2	4	3	4	3	3	3	1	0	0	0	4	3	0	0	0	1	0	2	3	0	0	2	0	0	1	1	0	2	1	4	2	0	2	2	3	0	1	0
RAB15	0	0	0	1	0	0	0	2	1	1	1	1	1	1	1	0	2	1	1	1	1	1	1	1	1	0	0	0	1	0	0	0	1	1	0	0	1	1	1	1	1	1	1	1	1	0	1	0	0
RAB1B	0	0	0	3	1	0	4	3	2	1	2	1	2	0	3	1	1	2	0	2	1	4	0	3	2	2	1	0	3	1	0	0	0	0	0	0	1	2	1	1	3	0	3	0	1	4	0	5	2
RAB2A	0	0	0	1	0	1	1	2	3	1	2	0	2	2	2	1	1	2	0	0	0	1	1	1	0	0	0	2	2	2	0	1	2	0	0	0	0	2	1	0	2	3	2	2	2	1	0	2	1
RAB5A	0	0	0	1	0	0	0	0	0	2	2	3	2	0	2	0	3	0	0	5	3	0	0	2	0	0	0	0	0	2	0	0	0	0	0	0	0	1	2	3	4	1	2	2	2	0	0	0	0
RAB5B	0	0	0	1	0	0	0	2	0	0	1	2	2	2	0	0	1	2	0	0	0	1	2	1	0	0	0	0	2	0	0	0	1	0	0	0	1	0	1	0	2	2	1	1	1	0	0	1	0
RAD23B	0	0	0	2	0	2	3	8	1	0	0	0	5	5	16	0	0	0	0	0	0	8	8	5	3	4	8	3	6	5	4	3	10	6	3	3	1	3	2	6	10	12	12	6	6	9	7	8	9
RAE1	0	0	0	1	0	0	0	0	0	0	0	0	0	1	0	1	0	0	0	0	0	0	0	0	0	0	0	0	0	1	0	0	0	0	0	0	1	1	1	0	1	0	0	0	0	0	0	0	0
RAP2A	0	0	0	2	2	0	2	2	0	0	0	0	0	0	2	0	5	3	0	2	0	2	2	0	0	0	0	1	0	2	1	0	5	0	0	0	2	2	3	0	3	2	0	3	2	3	0	0	2
RARS	0	0	0	1	0	0	0	0	1	2	3	1	0	0	0	2	2	2	0	0	0	1	1	2	0	0	0	2	2	3	1	0	0	0	0	0	2	0	1	0	2	2	1	2	5	0	0	0	0
RBM14	0	0	0	2	0	0	0	0	3	6	5	2	1	3	0	1	0	0	0	0	0	2	3	1	0	0	0	1	4	3	2	0	1	0	0	0	2	0	0	0	2	1	1	3	1	0	0	0	0
RCC1	0	0	0	2	2	0	0	2	2	4	2	2	0	1	0	3	0	1	0	0	0	2	1	6	1	0	0	0	1	2	0	0	0	0	0	0	5	1	1	1	3	2	2	2	2	0	0	0	0
RGN	0	0	0	4	2	0	0	1	1	1	1	0	0	0	0	2	1	1	0	1	1	1	0	1	1	0	1	0	1	0	1	1	1	0	0	0	1	1	0	0	1	1	0	2	2	0	0	0	0
RHEB	0	0	0	2	0	0	1	0	1	0	2	0	3	2	1	0	0	1	1	0	0	2	1	2	1	0	1	0	1	0	2	0	1	0	0	0	1	0	0	2	3	3	1	2	0	2	1	1	5
RPL10A	0	0	0	1	0	0	1	0	0	1	1	0	0	0	1	1	0	1	0	0	0	0	0	0	1	0	0	0	1	0	0	0	0	0	0	0	0	0	0	0	0	0	0	0	0	0	1	0	0
RPL21	0	0	0	2	1	0	0	0	0	3	2	1	4	1	1	2	2	3	0	0	0	3	1	2	0	0	0	2	3	3	0	0	2	2	2	2	1	0	1	0	3	1	2	2	1	0	0	0	0
RPS17	0	0	0	2	2	0	0	1	2	4	4	0	4	3	3	2	0	1	0	0	0	5	2	2	2	0	0	1	4	5	2	0	0	1	0	0	4	1	1	0	1	0	0	3	1	0	0	0	0
RPS7	0	0	0	1	1	0	1	2	2	3	2	2	0	2	1	0	1	2	1	0	0	2	3	2	2	0	1	1	2	0	0	0	2	2	0	0	1	0	2	0	2	1	0	0	1	1	0	0	0
RRAS2	0	0	0	1	0	0	1	0	1	2	2	3	1	2	1	1	2	4	2	3	5	3	3	3	0	1	3	0	1	1	3	0	3	3	1	2	3	6	3	1	2	1	2	2	3	3	4	3	5
RSL1D1	0	0	0	1	0	0	0	0	1	2	1	1	0	0	0	1	0	0	0	0	0	1	1	0	0	0	0	1	0	0	0	0	0	0	0	0	0	0	0	1	0	1	0	0	1	0	0	0	0
RTCB	0	0	0	3	1	1	0	1	1	6	5	1	2	0	0	4	3	4	1	0	0	9	8	7	2	1	2	4	4	5	3	2	3	1	0	0	5	3	5	2	3	1	3	6	6	1	1	4	3
S100A1	0	0	0	1	0	0	0	0	0	0	0	0	0	1	0	0	0	0	0	0	0	0	0	0	0	0	0	0	0	0	0	0	0	0	0	0	0	0	0	0	0	0	0	1	0	0	0	0	0
SCAMP2	0	0	0	1	2	0	1	1	0	0	0	1	1	0	0	0	0	0	0	0	0	0	0	0	0	0	0	0	1	0	0	0	2	0	0	0	0	0	0	0	0	1	0	0	0	1	0	2	3
SCAMP4	0	0	0	1	1	1	0	2	1	1	1	0	2	1	1	1	1	1	2	0	0	1	1	0	0	0	0	0	0	1	0	0	1	1	1	0	0	2	1	0	1	1	1	1	1	1	2	1	2
SCARB1	0	0	0	2	0	0	0	1	1	0	0	3	3	1	1	0	0	0	0	3	3	0	0	1	0	0	1	0	1	0	1	0	0	2	0	0	0	0	1	0	1	1	0	0	0	0	1	2	1
SEPT11	0	0	0	2	0	0	0	0	2	2	0	0	0	0	0	2	0	2	0	0	0	0	0	1	0	0	0	0	2	2	0	0	0	0	0	0	0	0	1	0	0	1	0	2	2	0	0	0	0
SEPT9	0	0	0	1	0	0	0	0	3	2	1	0	0	0	0	0	1	1	0	0	0	0	0	1	1	0	0	1	1	1	1	0	0	0	0	0	0	0	0	0	0	0	0	0	0	0	0	0	0
SERPINA7	0	0	0	1	0	0	0	1	1	0	0	0	0	0	0	0	0	1	0	1	1	1	1	0	1	1	1	0	1	0	0	1	0	0	0	0	0	0	0	1	0	0	0	0	0	0	0	0	0
SERPIND1	0	0	0	1	1	1	0	0	1	0	0	0	0	0	0	0	0	1	0	0	0	0	0	0	0	0	0	0	0	0	0	0	1	0	0	0	0	0	1	0	0	0	1	1	1	1	0	0	0
SF3B1	0	0	0	2	1	0	0	0	3	10	5	2	0	1	0	2	0	0	0	0	0	6	5	5	0	0	0	0	3	6	0	0	0	0	0	0	0	0	0	0	2	0	1	0	0	0	0	0	0
SH3GLB1	0	0	0	1	0	0	0	0	0	0	0	0	0	0	1	0	0	0	0	0	0	0	0	0	0	0	0	0	0	0	0	0	0	0	0	0	0	0	0	0	0	0	0	0	0	0	0	0	0
SLC20A2	0	0	0	2	0	0	0	0	0	0	0	1	3	0	0	0	1	0	0	1	0	0	0	0	0	0	0	0	0	0	0	0	0	0	0	0	0	2	0	0	0	0	0	0	0	0	0	0	0
SLC31A1	0	0	0	2	0	1	1	1	1	1	0	0	2	1	3	1	1	1	2	2	2	0	1	2	0	1	1	0	1	1	1	1	2	1	2	2	2	3	1	0	2	2	2	1	0	2	0	0	1
SLC39A10	0	0	0	1	0	0	0	2	1	0	0	1	4	1	3	1	2	2	2	3	3	1	3	2	0	0	0	0	0	2	2	1	3	1	1	1	2	1	2	1	1	1	1	0	0	1	1	2	1
SLC7A6	0	0	0	1	0	0	0	0	0	0	0	0	1	0	0	0	0	0	0	0	0	0	0	0	0	0	0	0	0	0	0	0	0	0	0	0	0	0	0	0	0	0	0	0	0	0	0	0	0
SLITRK5	0	0	0	2	0	0	2	2	0	0	0	1	3	2	0	2	3	5	7	7	8	3	6	3	0	0	4	2	1	2	3	1	6	0	5	2	5	9	5	1	2	3	1	1	0	3	3	7	7
SMC1A	0	0	0	1	1	0	0	0	1	3	0	0	0	0	0	0	0	1	0	0	0	2	0	1	0	0	0	0	0	0	1	0	0	0	0	0	0	0	0	0	2	1	0	1	0	0	0	0	0
SMCHD1	0	0	0	1	0	0	0	0	0	1	1	0	0	0	0	0	0	0	0	0	0	1	0	0	0	0	0	0	0	1	0	0	0	0	0	0	0	0	0	0	1	1	1	0	0	0	0	0	0
SNRNP200	0	0	0	1	1	0	0	0	4	7	7	3	0	0	0	3	1	3	0	0	0	8	0	7	1	0	0	1	2	2	2	1	0	0	0	0	1	2	2	0	7	6	2	7	5	0	0	0	0
SNRPF	0	0	0	1	1	0	0	1	1	2	1	1	0	1	1	0	1	1	0	1	1	1	0	1	0	1	0	1	0	1	0	1	1	0	0	0	1	1	0	1	1	1	0	0	0	1	0	0	1
SORD	0	0	0	1	0	0	1	0	1	0	1	0	0	0	0	0	1	1	0	0	0	0	1	0	0	0	0	0	0	0	0	1	0	0	0	0	1	1	0	0	0	1	1	1	1	0	0	0	0
SRGAP2	0	0	0	1	0	0	0	1	0	0	0	1	1	3	1	0	0	1	0	0	0	0	0	0	0	0	0	0	0	0	0	0	1	0	0	0	0	0	0	0	0	0	0	0	0	0	0	0	0
SRI	0	0	0	1	1	0	2	1	1	2	1	2	2	3	3	1	3	1	1	0	1	1	0	0	0	0	1	1	3	2	0	0	3	0	0	0	0	1	0	1	1	2	1	0	0	2	0	2	3
SRP68	0	0	0	1	0	0	0	0	0	1	1	0	0	0	0	0	0	0	0	0	0	1	0	0	0	0	0	0	0	1	0	0	0	0	0	0	0	0	0	0	0	0	0	0	0	0	0	0	0
SRRT	0	0	0	1	0	0	0	0	1	2	4	1	0	1	0	0	0	0	0	0	0	2	3	4	0	0	0	1	1	5	0	0	0	0	0	0	0	0	0	0	1	0	0	0	1	0	0	0	0
STAM	0	0	0	3	2	0	4	3	3	2	1	7	1	1	3	1	1	0	1	1	1	0	0	0	0	0	0	0	0	4	0	0	4	0	0	0	0	0	0	0	0	0	0	0	0	0	1	3	2
STRAP	0	0	0	4	2	1	1	4	4	6	9	2	0	1	1	3	2	4	2	0	0	6	6	5	1	0	1	3	3	6	2	1	0	0	0	0	7	1	3	2	5	1	1	3	3	0	1	0	1
STUB1	0	0	0	2	0	0	1	4	0	0	1	0	5	4	0	0	1	0	1	2	2	3	2	4	0	0	1	0	1	0	0	0	1	1	0	0	1	0	0	1	2	2	1	0	0	0	0	0	1
STX4	0	0	0	1	0	2	2	3	5	3	4	7	10	9	9	2	2	0	2	4	2	1	2	4	0	1	3	1	2	3	1	0	3	2	2	1	1	3	5	0	5	5	0	1	1	1	1	1	2
SULT1C2	0	0	0	1	0	0	0	0	0	0	1	1	0	0	0	0	1	1	0	0	0	0	0	1	0	0	0	0	1	0	1	0	0	0	0	0	0	0	1	0	0	0	0	1	1	0	0	0	0
SVIP	0	0	0	1	0	1	0	2	0	0	0	0	1	2	3	1	2	3	0	1	2	1	2	1	0	0	0	0	1	1	1	0	2	0	1	0	0	0	1	0	0	1	0	0	0	0	0	1	1
TMED10	0	0	0	2	1	0	0	0	0	1	1	1	0	0	0	0	0	0	0	0	1	0	0	0	0	0	0	0	0	0	0	0	0	0	0	0	0	0	0	0	1	0	0	0	0	2	2	0	1
TMEM2	0	0	0	1	0	0	0	0	0	0	0	0	0	0	0	0	0	0	0	0	0	0	0	0	0	0	0	0	0	0	0	0	0	1	0	0	1	3	1	0	0	0	0	0	0	0	0	0	0
TNPO1	0	0	0	1	0	0	0	1	1	3	0	1	0	0	0	0	0	0	0	0	0	0	2	2	0	0	0	0	2	2	0	0	0	0	0	0	0	0	0	0	2	1	0	1	1	0	0	0	0
TOP2B	0	0	0	1	0	0	0	0	0	0	0	0	0	0	0	0	0	0	0	0	0	0	0	0	0	0	0	0	0	0	0	0	0	0	0	0	0	0	0	0	0	0	0	0	0	0	1	0	0
TPBG	0	0	0	1	1	0	0	2	0	0	0	0	1	2	1	0	1	0	0	0	0	1	0	0	0	0	0	0	0	0	0	0	1	0	1	0	0	1	1	0	2	2	0	1	1	1	0	1	0
TPP1	0	0	0	1	0	0	0	0	0	1	1	0	0	0	0	0	0	0	0	0	0	0	0	1	0	0	0	0	1	0	0	0	0	0	0	0	0	0	1	0	1	1	0	1	0	0	0	0	0
TUBG1	0	0	0	1	0	0	0	1	0	2	2	0	0	0	0	1	0	0	0	0	0	1	0	1	1	0	0	0	1	0	0	0	2	0	0	0	0	1	0	0	3	2	0	1	0	0	0	0	0
TUBGCP2	0	0	0	1	0	0	0	0	0	0	0	0	0	0	0	0	1	0	0	0	0	0	0	1	0	0	0	0	0	0	0	0	0	0	0	0	0	0	0	0	0	0	0	0	0	0	0	0	0
UBA2	0	0	0	1	0	1	0	0	2	2	2	0	1	0	0	1	0	0	0	0	0	3	2	5	1	1	1	0	1	3	0	0	0	0	0	0	2	0	0	0	0	1	2	1	1	0	0	0	0
UBA6	0	0	0	1	1	0	0	0	1	1	1	0	0	0	0	0	0	2	0	0	0	1	1	2	0	0	0	0	1	2	0	0	0	0	0	0	2	1	1	0	0	0	0	2	2	0	0	0	0
UBR4	0	0	0	1	1	0	0	0	1	0	0	0	0	0	0	0	0	1	0	0	0	1	0	0	0	0	0	0	0	0	0	0	1	0	0	0	0	0	1	0	0	1	0	0	1	0	0	0	0
UBR5	0	0	0	1	0	0	0	0	0	0	0	0	0	0	0	0	0	0	0	0	0	0	0	0	0	0	0	0	0	0	0	0	0	0	0	0	0	0	0	0	0	0	0	0	0	0	0	0	0
UGDH	0	0	0	4	0	0	0	3	2	1	3	0	0	0	0	1	0	3	0	0	0	0	0	0	0	1	0	0	4	2	0	0	0	0	0	0	0	0	1	0	1	0	0	2	3	1	0	0	0
UROC1	0	0	0	3	0	0	0	1	1	1	1	0	0	0	0	0	0	0	0	0	0	0	0	0	0	0	0	0	0	0	0	0	0	0	0	0	0	0	0	0	0	0	0	1	1	0	0	0	0
USO1	0	0	0	1	0	0	0	1	0	2	2	0	0	0	0	0	1	1	0	0	0	1	0	0	0	0	0	1	1	0	0	0	0	1	0	0	0	0	1	0	1	0	1	2	3	0	0	0	0
USP14	0	0	0	1	0	1	0	1	0	1	0	0	0	0	0	0	0	0	0	0	0	1	0	1	0	0	0	0	0	0	0	0	0	0	0	0	0	0	0	0	0	0	0	0	0	1	0	2	2
USP15	0	0	0	1	0	0	0	0	0	0	0	0	0	0	0	0	0	0	0	0	0	0	0	0	0	0	0	0	0	0	0	0	0	0	0	0	0	0	0	0	0	0	0	0	0	0	0	0	0
USP5	0	0	0	2	2	0	0	0	1	1	2	3	1	0	1	2	0	0	0	1	1	2	0	2	1	1	1	0	1	1	0	0	1	0	0	0	1	1	1	0	1	2	2	3	1	1	0	0	0
USP9X	0	0	0	1	0	0	0	0	4	4	2	1	0	0	0	0	1	3	0	0	0	0	0	2	0	0	0	0	0	4	0	0	0	0	0	0	0	0	0	0	0	0	0	0	0	0	0	0	0
UXS1	0	0	0	2	3	0	1	2	1	1	0	1	0	0	0	3	1	4	0	0	0	2	1	3	1	0	0	0	2	3	0	1	0	0	0	0	1	0	2	0	1	2	1	2	1	0	0	1	0
VPS4A	0	0	0	2	0	4	3	1	2	1	0	2	5	1	0	4	5	3	3	4	3	5	7	3	0	0	4	0	4	3	2	0	4	2	13	7	3	5	3	5	4	4	1	3	1	5	3	6	5
WDR6	0	0	0	1	0	0	0	1	0	0	1	1	1	3	2	2	7	6	2	4	4	1	3	1	0	0	0	0	1	2	1	0	0	0	0	0	1	1	1	1	1	0	1	0	0	0	0	2	1
XPO5	0	0	0	1	0	0	0	0	0	1	0	0	0	0	0	0	0	0	0	0	0	2	1	2	0	0	0	0	0	1	0	0	0	0	0	0	1	0	0	0	1	1	0	0	0	0	0	0	0
XRCC6	0	0	0	2	1	0	0	2	6	13	11	6	0	0	1	2	2	5	0	0	0	10	5	11	0	0	0	3	4	7	0	0	0	0	0	0	4	3	3	0	7	6	4	6	3	1	0	0	0
XRN2	0	0	0	1	0	0	0	0	1	2	3	1	0	0	0	1	0	1	0	0	0	3	1	1	0	0	0	0	0	1	0	0	0	0	0	0	0	0	0	0	0	0	0	2	0	0	0	0	0
ZDHHC5	0	0	0	1	0	0	0	0	0	0	0	2	6	3	2	0	0	0	1	0	0	0	0	2	0	0	0	0	1	0	1	0	1	0	1	0	0	2	5	0	1	2	0	0	1	0	0	0	1
ADRM1	0	0	0	0	1	0	0	1	1	1	1	0	2	1	2	1	0	0	1	0	0	2	2	1	1	1	0	0	1	1	0	0	1	0	0	0	0	0	1	0	1	1	1	1	1	1	2	2	1
AGTRAP	0	0	0	0	1	0	0	0	0	0	0	0	0	0	0	0	0	0	0	0	0	0	0	0	0	0	0	0	0	0	0	0	0	0	0	0	0	0	0	0	0	0	0	0	0	0	0	0	0
AP2M1	0	0	0	0	1	0	0	0	0	0	1	1	0	0	0	0	0	0	0	0	0	1	0	1	0	0	1	0	0	0	0	0	0	0	0	0	0	0	0	0	0	0	0	0	0	1	0	0	1
AP3B1	0	0	0	0	1	0	0	0	0	1	0	0	0	0	0	0	0	0	0	0	0	0	0	0	0	0	0	0	0	0	0	0	0	0	0	0	0	0	0	0	0	0	0	0	0	0	0	0	0
APLP2	0	0	0	0	1	0	0	0	0	0	0	1	0	0	0	0	0	0	0	0	1	0	0	0	0	0	0	0	0	0	0	0	0	0	0	0	0	0	0	0	0	0	0	0	0	0	0	0	0
ARHGEF2	0	0	0	0	1	0	0	0	0	1	1	0	0	0	0	0	0	0	0	0	0	0	0	0	0	0	0	0	0	1	0	0	0	0	0	0	0	0	0	0	0	1	0	0	0	0	0	0	0
ATG3	0	0	0	0	1	0	0	0	0	0	1	0	0	0	0	0	0	0	0	0	0	0	0	0	0	0	0	0	1	0	0	0	0	0	0	0	0	0	0	0	0	0	0	0	0	0	0	0	0
ATG9A	0	0	0	0	2	0	0	0	0	0	0	0	0	0	0	0	0	0	0	0	0	0	0	0	0	0	0	0	0	0	0	0	0	0	0	0	0	0	0	0	0	0	0	0	0	1	0	0	0
C3P1	0	0	0	0	1	0	0	0	0	0	0	0	0	0	0	0	0	0	0	0	0	0	0	0	0	0	0	0	0	0	0	0	0	0	0	0	0	0	0	0	0	0	0	0	0	0	0	0	0
CCZ1B	0	0	0	0	1	0	0	0	0	0	0	0	0	0	0	0	0	0	0	0	0	0	0	0	0	0	0	0	0	0	0	0	0	0	0	0	0	0	0	0	0	0	0	0	0	0	0	0	0
CDH2	0	0	0	0	1	0	0	1	0	0	0	1	5	3	2	0	0	0	0	0	0	0	0	0	0	0	0	0	0	0	0	0	0	0	0	0	0	0	0	0	0	0	0	0	0	0	0	0	0
CLU	0	0	0	0	2	0	0	0	1	2	0	1	1	0	0	2	2	3	1	0	0	5	2	3	0	0	0	0	0	0	0	0	0	0	0	0	0	0	4	0	4	2	1	3	4	1	0	0	0
COG3	0	0	0	0	1	0	0	0	0	0	0	0	0	0	0	1	0	0	0	0	0	0	0	0	0	0	0	0	0	0	0	0	0	0	0	0	0	0	0	0	0	0	0	1	0	0	0	0	0
COPZ1	0	0	0	0	1	0	0	0	0	0	0	0	0	0	0	1	0	0	0	0	0	0	0	0	0	0	0	1	0	0	0	0	0	0	0	0	1	0	0	0	0	0	0	0	0	0	0	0	0
DAZAP2	0	0	0	0	1	0	0	0	0	0	0	0	0	0	0	0	0	0	0	0	0	0	0	0	0	0	0	0	0	0	0	0	0	0	0	0	0	0	0	0	0	0	0	0	0	0	0	0	0
EIF2S3	0	0	0	0	1	0	0	1	0	1	1	1	0	0	0	0	0	1	0	0	0	1	2	0	0	0	0	0	2	3	0	0	0	0	0	0	1	0	0	0	0	0	1	1	1	0	0	0	0
EIF3J	0	0	0	0	1	0	0	0	0	0	0	0	0	0	0	0	0	0	0	0	0	0	0	0	0	0	0	0	0	0	0	0	0	0	0	0	0	0	0	0	0	0	0	0	0	0	0	0	0
EIF4G1	0	0	0	0	3	0	0	1	0	3	2	2	1	1	0	2	0	2	0	0	0	4	1	1	0	0	0	1	0	0	0	0	0	0	0	0	1	0	0	0	1	1	0	0	0	1	1	8	7
ELP3	0	0	0	0	1	0	0	0	0	1	2	0	0	0	0	1	0	1	0	0	0	1	1	1	0	0	0	0	1	0	0	0	0	0	0	0	0	0	0	1	1	0	0	0	0	0	0	0	0
FBL	0	0	0	0	2	0	0	0	0	0	1	1	0	0	0	2	0	0	1	0	0	0	2	1	0	0	0	0	2	2	0	0	0	0	0	0	1	0	0	0	0	0	0	0	1	0	0	0	0
FLOT2	0	0	0	0	1	0	0	1	0	1	0	2	0	2	2	0	1	2	0	1	0	1	0	0	0	0	0	0	0	0	0	0	0	0	0	0	0	0	0	0	0	0	0	0	0	0	0	0	0
FYN	0	0	0	0	1	0	0	3	2	1	0	3	5	1	5	1	0	1	2	6	4	3	7	5	0	0	4	0	0	0	1	0	7	1	1	0	0	3	1	1	4	6	3	2	0	1	1	3	1
GARS	0	0	0	0	1	0	0	0	1	2	1	0	0	0	0	0	0	0	0	0	0	1	1	1	0	0	0	0	0	0	0	0	0	0	0	0	0	0	2	0	1	2	0	2	4	0	0	0	0
GEMIN2	0	0	0	0	1	0	0	0	0	1	0	0	0	0	0	0	1	0	0	0	0	1	0	0	0	0	0	0	0	0	0	0	0	0	0	0	0	0	0	0	0	0	0	0	0	0	0	0	0
GPI	0	0	0	0	1	0	1	1	0	0	0	0	0	1	2	0	0	0	0	0	0	0	0	0	0	0	0	0	1	0	0	0	2	0	0	0	0	0	6	0	3	2	0	3	3	1	0	0	0
GPM6A	0	0	0	0	1	0	0	0	0	0	0	1	0	1	1	0	1	0	0	1	2	0	0	0	0	0	0	0	0	0	0	0	1	0	0	0	0	0	0	0	0	1	0	0	0	0	0	1	0
H2AFX	0	0	0	0	1	0	0	0	0	0	1	0	0	0	0	0	0	0	0	0	0	0	0	0	0	0	0	0	0	0	0	0	0	0	0	0	0	0	0	0	0	0	0	0	0	0	0	0	0
HNRNPA2B1	0	0	0	0	2	1	0	2	2	1	2	2	3	2	2	0	2	2	0	0	0	2	0	1	0	0	0	0	0	1	0	0	2	0	0	0	0	0	0	0	1	0	0	1	1	1	0	0	3
HNRNPA3	0	0	0	0	1	0	0	1	1	3	3	0	3	4	2	0	2	2	0	0	1	2	2	2	1	0	0	0	3	3	0	1	2	0	0	0	2	1	1	1	3	2	1	2	2	0	0	0	1
HRAS	0	0	0	0	1	0	0	2	0	0	0	0	4	1	0	2	5	1	0	0	0	1	0	0	0	0	0	0	0	0	0	0	0	0	0	0	0	0	0	0	0	0	0	0	0	0	0	0	0
HTATSF1	0	0	0	0	1	0	0	0	0	1	2	0	0	0	0	0	0	0	0	0	0	1	0	0	0	0	0	0	0	2	0	0	0	0	0	0	0	0	0	0	0	0	0	0	0	0	0	0	0
HYOU1	0	0	0	0	1	0	0	2	1	5	2	1	0	1	0	3	1	5	0	0	1	5	4	7	2	1	1	0	6	2	1	0	1	0	0	0	1	1	6	0	3	1	2	6	5	0	0	0	2
IGF2BP2	0	0	0	0	1	1	1	3	1	1	1	0	2	1	2	1	0	0	0	0	0	1	2	4	0	0	0	0	2	3	0	0	1	0	1	0	0	1	0	0	0	0	0	0	0	0	0	0	1
IGF2R	0	0	0	0	2	0	1	1	0	0	0	0	1	0	0	0	0	0	0	0	0	1	0	0	0	0	0	0	0	0	0	0	0	0	0	0	0	0	0	0	0	0	0	0	0	1	0	0	0
KIF5B	0	0	0	0	2	0	0	2	1	5	5	3	0	0	0	6	0	0	0	0	0	1	1	5	0	0	0	2	1	7	0	0	0	0	0	0	0	1	0	0	4	0	0	0	0	0	0	0	0
LPL	0	0	0	0	1	0	0	0	0	0	0	0	0	0	0	2	0	0	0	0	0	0	1	0	0	0	0	0	0	0	0	0	0	0	0	0	0	0	0	1	0	0	0	0	0	0	0	0	0
MAP2K2	0	0	0	0	2	0	0	1	0	1	1	0	0	0	0	0	0	0	0	0	0	0	0	1	0	0	0	0	0	0	0	0	0	0	0	0	0	0	0	0	2	0	0	1	0	0	0	0	0
MAPK1IP1L	0	0	0	0	1	1	0	1	1	1	1	1	1	1	1	1	1	1	1	1	1	0	1	0	0	0	1	1	1	1	1	0	1	0	0	0	1	0	1	0	0	1	0	1	0	1	1	1	1
MBD3	0	0	0	0	1	0	0	0	0	2	1	0	0	0	0	0	0	0	0	0	0	1	0	1	0	0	0	0	0	0	0	0	0	0	0	0	0	0	0	0	0	0	0	0	0	0	0	0	0
MCM2	0	0	0	0	2	0	0	0	0	0	0	0	1	1	0	1	0	0	0	0	0	1	0	0	0	0	0	0	0	0	0	0	0	0	0	0	0	0	1	0	0	0	0	0	0	0	0	0	0
MDN1	0	0	0	0	2	0	0	0	1	3	0	0	0	0	0	0	0	0	0	0	0	4	0	3	0	0	0	0	0	0	1	0	0	0	0	0	0	0	0	0	0	1	0	1	1	0	0	0	0
MMS19	0	0	0	0	1	0	0	0	0	1	3	0	0	0	0	0	0	0	0	0	0	1	0	1	0	0	0	0	0	1	0	0	0	0	0	0	1	0	0	0	1	1	1	1	0	0	0	0	0
MTA2	0	0	0	0	1	0	0	0	0	0	0	0	0	0	0	2	0	2	0	0	0	2	1	3	0	0	0	0	2	1	0	1	0	0	0	0	1	0	0	0	1	0	0	0	2	0	0	0	0
MYO1C	0	0	0	0	1	0	1	0	1	1	1	1	4	6	4	0	1	0	0	0	0	0	1	1	0	0	0	0	1	1	0	0	0	0	0	0	0	0	2	0	2	0	0	3	3	0	0	0	0
NAMPT	0	0	0	0	1	0	0	0	1	0	1	0	0	0	0	0	0	1	0	0	0	0	1	1	0	0	0	0	0	0	0	0	0	0	0	0	0	0	0	0	2	0	0	1	0	0	0	0	0
NOTCH3	0	0	0	0	1	0	1	1	1	1	1	0	0	0	0	0	0	0	0	0	0	0	0	1	0	0	0	0	1	0	0	0	1	0	0	0	0	0	0	0	0	0	0	0	0	0	0	0	0
NPM3	0	0	0	0	1	0	0	0	0	0	0	0	1	1	1	0	0	0	0	0	0	0	0	0	0	0	0	0	0	0	0	0	0	0	0	0	0	0	0	0	0	0	0	0	0	0	0	0	0
NUP93	0	0	0	0	1	0	0	0	1	0	2	0	0	0	0	1	0	1	0	0	0	0	0	1	0	0	0	0	1	1	0	0	0	0	0	0	1	0	0	0	1	1	0	1	0	0	0	0	0
PCBP3	0	0	0	0	1	0	0	0	0	0	0	1	0	0	0	1	0	0	0	0	0	0	0	0	0	0	0	0	0	0	0	0	0	0	0	0	0	0	0	1	0	0	0	0	0	0	0	0	0
PCNA	0	0	0	0	1	0	0	1	1	0	1	0	0	0	0	1	0	0	0	0	0	1	0	2	0	0	0	0	0	0	0	0	0	0	0	0	0	0	0	0	0	0	0	0	0	0	0	0	0
PDCD2L	0	0	0	0	1	0	0	1	0	0	0	0	1	1	1	0	0	0	0	0	0	0	0	1	0	0	0	0	0	0	0	0	1	0	0	0	0	0	0	0	1	0	0	0	0	0	0	0	0
PELP1	0	0	0	0	1	0	0	0	0	0	0	0	0	0	0	0	0	0	0	0	0	0	0	0	0	0	0	0	0	0	0	0	0	0	0	0	0	0	0	0	0	0	0	0	0	0	0	0	0
POLD1	0	0	0	0	1	1	0	0	1	1	1	0	0	0	0	0	0	0	0	0	0	0	2	1	0	0	0	0	1	2	0	0	0	1	0	0	0	0	0	0	0	0	0	1	0	0	1	0	1
POLR2A	0	0	0	0	1	0	0	0	1	2	2	2	0	0	0	4	0	1	0	0	0	2	2	2	0	0	0	0	2	3	1	0	0	0	0	0	1	0	2	0	1	1	1	5	5	0	0	0	0
PPA1	0	0	0	0	1	0	0	2	1	1	0	0	0	0	0	0	0	0	0	0	0	1	2	1	0	0	0	0	2	1	0	0	0	0	0	0	0	0	0	0	0	0	0	0	0	0	0	0	0
PRIM2	0	0	0	0	1	0	0	0	0	0	1	0	0	0	0	0	0	0	0	0	0	2	0	1	0	0	0	0	0	1	0	0	0	0	0	0	0	0	0	0	1	0	1	0	1	0	0	0	0
PRMT1	0	0	0	0	1	0	0	1	3	4	4	1	0	0	0	1	1	1	0	0	0	1	1	2	1	0	0	1	2	1	0	1	0	0	0	0	3	1	1	2	2	0	2	2	3	0	0	0	1
PSMD10	0	0	0	0	1	0	0	0	0	0	0	0	0	0	0	0	0	0	0	0	0	0	0	0	0	0	0	0	0	0	0	0	1	0	0	0	0	0	0	0	1	0	0	0	0	0	0	0	0
PTPRF	0	0	0	0	1	0	1	3	0	0	0	2	8	3	3	2	3	0	0	3	4	4	5	6	0	0	0	0	2	1	1	0	6	0	1	0	0	2	2	1	0	5	2	2	1	0	0	3	2
PTTG1IP	0	0	0	0	1	0	0	0	0	0	0	0	1	0	1	0	0	0	0	0	0	1	0	0	0	0	0	0	0	0	0	0	0	1	0	0	0	0	0	0	0	0	0	0	0	0	1	0	0
QARS	0	0	0	0	1	0	0	0	1	2	2	0	0	0	0	2	1	3	0	0	0	2	0	4	0	0	0	2	1	2	0	0	0	0	0	0	1	1	1	0	2	1	3	2	2	0	0	0	0
RAB21	0	0	0	0	1	0	0	2	1	1	1	1	2	0	1	1	1	1	1	0	0	1	2	2	0	0	0	0	2	2	0	1	1	1	0	0	0	1	1	1	2	1	0	0	1	2	0	1	0
RAP1A	0	0	0	0	3	0	0	9	4	5	0	0	0	6	9	0	0	0	0	0	0	0	0	0	0	0	4	0	0	11	0	0	0	0	0	0	0	0	4	0	2	0	0	0	0	0	3	3	0
RBBP7	0	0	0	0	1	0	0	0	0	1	1	0	0	0	0	1	0	0	0	0	0	0	0	1	0	0	0	4	0	0	0	0	0	0	0	0	0	0	0	0	1	0	0	1	2	0	0	0	0
RPL23	0	0	0	0	1	0	0	1	1	1	0	1	1	2	1	1	1	1	1	0	1	2	1	0	0	0	0	0	2	2	1	0	1	0	1	1	1	1	0	0	1	1	1	1	0	0	0	1	0
RPS27	0	0	0	0	1	0	0	1	1	1	1	0	1	1	0	1	1	1	0	0	0	0	1	2	0	0	0	0	0	1	0	0	0	0	0	0	0	0	0	0	0	0	0	1	1	0	0	0	0
SCAMP1	0	0	0	0	3	0	1	0	1	3	1	2	1	0	1	1	2	0	3	0	0	0	1	1	0	0	0	0	1	1	0	1	2	0	0	0	0	0	0	0	1	0	0	0	0	1	2	0	0
SFN	0	0	0	0	1	0	0	0	0	0	0	0	0	0	0	0	0	0	0	0	0	0	0	0	0	0	0	0	0	0	0	0	0	0	0	0	0	0	0	0	7	0	0	0	0	0	0	0	0
SLC35E1	0	0	0	0	1	0	0	0	0	0	0	0	0	0	0	0	0	0	0	0	0	0	0	0	0	0	0	0	0	0	0	0	0	0	0	0	0	0	0	0	0	0	0	0	0	0	0	0	0
SLC5A3	0	0	0	0	1	0	0	0	0	1	0	0	1	0	0	0	0	0	0	1	0	0	0	0	0	0	0	0	0	0	1	0	1	0	1	0	0	1	0	0	1	1	0	0	0	0	0	0	0
SLC7A1	0	0	0	0	1	0	1	1	1	0	0	0	0	0	0	0	0	1	2	2	2	3	2	1	0	0	2	0	0	0	2	0	2	0	3	3	0	2	0	1	3	3	2	0	0	1	1	2	2
SMC4	0	0	0	0	1	0	0	0	0	3	0	1	0	2	1	3	1	0	0	0	0	3	4	4	0	0	0	0	2	6	0	0	0	0	0	0	2	0	0	0	0	1	1	3	3	0	0	0	0
SND1	0	0	0	0	2	0	0	2	3	2	5	0	0	0	0	1	1	2	0	0	0	5	3	3	1	0	0	2	3	4	0	0	1	0	0	0	1	0	0	0	5	6	1	2	1	0	0	0	0
SSB	0	0	0	0	2	1	0	0	0	0	0	0	1	1	1	1	0	0	0	0	0	0	1	0	0	0	0	0	0	0	0	0	0	0	0	0	0	0	0	0	2	0	0	0	0	0	0	0	0
STOM	0	0	0	0	2	0	1	1	1	1	1	4	3	2	4	0	1	0	0	1	0	1	2	0	0	0	0	0	0	0	0	0	2	2	0	0	0	0	0	0	3	3	0	0	0	1	0	0	1
STX12	0	0	0	0	3	0	1	2	0	4	3	4	4	2	2	1	0	1	0	0	0	1	0	1	0	0	0	0	1	2	0	0	6	0	0	0	0	0	0	0	0	0	0	0	0	2	2	2	3
STX7	0	0	0	0	1	0	0	1	0	2	0	2	0	0	0	0	0	0	0	0	0	1	0	0	0	0	0	0	0	1	0	0	0	0	0	0	0	0	0	0	0	0	0	0	0	0	0	1	0
TFG	0	0	0	0	1	0	1	1	0	0	0	1	0	2	1	0	1	0	1	0	0	0	0	0	0	0	0	0	0	0	0	0	0	0	0	0	0	0	0	0	0	0	0	0	0	0	0	0	1
TRA2A	0	0	0	0	1	0	0	0	1	1	2	1	0	0	0	0	0	0	0	0	0	0	0	0	0	0	0	0	1	0	0	0	0	0	0	0	0	0	0	0	0	0	0	0	0	0	0	0	0
TRAPPC6B	0	0	0	0	1	0	0	0	0	0	0	0	0	0	0	0	0	0	0	0	0	0	0	0	0	0	0	0	0	0	0	0	0	0	0	0	0	0	0	0	0	0	0	0	0	0	0	0	0
TUBB2B	0	0	0	0	3	0	1	0	2	1	1	0	0	0	0	1	0	3	0	0	0	2	0	4	4	0	2	2	0	0	0	0	0	0	0	0	0	0	4	0	0	0	0	0	0	0	0	0	0
UBTD2	0	0	0	0	1	0	0	1	0	0	0	0	0	0	1	0	0	1	2	0	0	0	2	1	0	0	0	0	0	0	0	0	2	0	0	0	0	1	2	0	0	0	0	0	0	0	0	0	1
XPNPEP1	0	0	0	0	2	0	0	1	1	1	0	0	0	0	0	1	1	0	0	0	0	1	0	1	0	0	0	0	1	3	0	0	0	0	0	0	1	0	1	0	1	0	0	1	1	1	0	0	0
YIPF6	0	0	0	0	1	0	0	0	0	1	0	1	0	0	0	0	1	0	1	1	1	0	0	0	0	0	0	0	0	0	0	0	1	0	0	0	0	0	0	0	0	0	0	0	0	1	0	0	0
ZRANB2	0	0	0	0	1	0	0	1	0	0	1	1	2	2	3	0	0	0	0	0	0	0	0	0	0	0	0	0	0	1	0	0	0	2	0	0	0	0	0	0	0	0	0	0	0	0	0	0	0
ACTBL2	0	0	0	0	0	7	0	0	0	0	0	0	0	0	0	0	0	0	0	0	0	0	0	0	0	0	0	0	0	0	1	0	0	0	0	0	1	8	2	0	0	0	8	2	7	0	0	0	0
ANP32A	0	0	0	0	0	1	0	0	0	0	0	0	0	0	0	0	0	0	0	0	0	0	0	0	0	0	0	0	0	0	0	0	0	0	0	0	0	0	0	0	0	0	0	0	0	0	0	0	0
ANP32E	0	0	0	0	0	1	0	0	0	0	0	0	0	0	0	0	0	0	0	0	0	0	0	0	0	0	0	0	0	0	0	0	0	0	0	0	0	0	0	0	0	0	0	0	0	0	0	0	0
ANXA6	0	0	0	0	0	1	1	4	0	1	1	3	2	6	5	0	0	0	2	3	2	2	0	1	0	0	1	0	0	0	0	0	2	0	0	0	0	0	0	0	1	1	0	0	0	1	0	2	2
CAPNS1	0	0	0	0	0	1	0	4	3	1	0	3	0	0	0	1	0	0	1	0	0	2	1	0	1	3	0	0	3	1	0	0	0	0	1	0	0	0	0	0	1	0	0	0	0	1	0	0	0
CAPZA2	0	0	0	0	0	1	0	0	0	0	0	0	1	0	0	0	0	0	0	0	0	0	0	0	0	0	0	0	0	1	0	0	0	0	0	0	0	0	0	0	0	0	0	0	0	0	0	0	0
CBSL	0	0	0	0	0	1	0	1	1	0	1	0	0	0	0	1	0	1	0	0	0	1	1	1	1	0	0	1	0	1	0	1	1	0	0	0	1	1	1	1	1	1	1	2	1	0	0	1	1
CD58	0	0	0	0	0	1	0	0	0	0	0	0	2	0	1	0	0	0	0	0	0	0	1	1	0	0	0	0	0	0	0	0	2	0	0	0	0	0	0	0	2	2	0	1	0	1	1	1	1
CHMP3	0	0	0	0	0	1	0	1	0	0	0	1	0	1	0	0	2	1	2	3	2	3	1	2	0	0	1	0	0	0	0	0	1	1	2	1	0	2	1	2	1	3	2	1	0	3	2	4	4
CLEC3B	0	0	0	0	0	2	0	0	0	0	0	0	0	0	0	0	0	0	0	0	0	0	0	0	0	0	0	0	0	0	0	0	0	0	0	0	0	0	0	0	0	0	0	0	0	0	0	0	0
DDX5	0	0	0	0	0	2	0	0	4	8	5	4	2	3	2	0	0	3	0	0	0	6	4	4	0	0	0	4	0	5	0	0	1	0	0	0	0	1	0	0	2	0	0	2	1	0	0	0	0
EEF1A2	0	0	0	0	0	15	0	0	0	5	7	0	0	0	0	0	0	0	0	0	0	0	7	3	0	0	0	0	0	7	0	0	0	11	0	0	0	0	0	0	0	0	0	0	0	0	0	0	0
ESD	0	0	0	0	0	1	0	1	0	0	0	0	0	0	0	0	0	0	0	0	0	1	0	0	0	0	0	0	1	1	0	0	0	0	0	0	1	0	0	0	0	1	0	0	1	0	0	0	0
FKBP1A	0	0	0	0	0	1	0	1	0	0	0	1	2	2	1	0	0	0	0	0	0	0	1	0	0	0	0	0	1	1	1	0	1	0	0	0	0	0	1	1	1	2	1	1	1	1	0	1	0
GLA	0	0	0	0	0	1	0	1	3	2	1	2	0	0	0	3	2	3	0	0	0	2	2	1	0	0	0	0	2	2	0	0	0	0	0	0	1	0	2	0	2	1	0	2	3	0	0	0	0
GSPT1	0	0	0	0	0	1	0	0	0	1	1	0	0	0	0	0	0	0	0	0	0	0	0	0	0	0	0	0	0	0	0	0	0	0	0	0	0	0	0	0	0	0	0	0	0	0	0	0	0
HBG1	0	0	0	0	0	1	0	0	0	0	0	0	0	0	0	0	0	0	0	0	0	0	0	0	0	0	0	0	0	0	0	0	0	0	0	0	0	0	0	0	0	0	0	0	0	0	0	0	0
HINT1	0	0	0	0	0	1	0	0	0	0	0	0	0	0	0	1	0	0	0	0	0	0	0	0	0	0	0	0	0	0	0	0	0	0	0	0	0	0	0	0	0	0	0	0	0	0	0	0	0
HIST1H2AG	0	0	0	0	0	1	0	0	0	0	0	0	1	1	0	1	0	0	0	0	0	0	0	0	0	0	0	0	0	0	0	0	0	0	0	0	0	0	0	0	0	0	0	0	0	0	0	0	0
LGALS1	0	0	0	0	0	1	0	0	0	0	0	0	0	0	0	0	0	0	0	0	0	0	0	0	0	0	0	0	0	0	0	0	0	0	0	0	0	0	0	0	0	0	0	0	0	0	0	0	0
LSM8	0	0	0	0	0	1	0	0	0	0	0	0	0	0	0	0	0	0	0	0	0	0	0	0	0	0	0	0	0	0	0	0	0	0	0	0	0	0	0	0	0	0	0	0	0	0	0	0	0
LYPLA1	0	0	0	0	0	1	0	0	0	0	0	0	0	0	0	0	0	0	0	0	0	0	0	0	0	0	0	0	0	0	0	0	0	0	0	0	0	0	0	0	0	0	0	0	0	0	0	0	0
MRPS30	0	0	0	0	0	1	0	0	0	0	0	0	0	0	0	0	0	0	0	0	0	0	0	0	0	0	0	0	0	0	0	0	0	0	0	0	0	0	0	0	0	0	0	0	0	0	0	0	0
NASP	0	0	0	0	0	2	0	0	0	0	0	0	0	0	0	0	0	0	0	0	0	0	0	0	0	0	0	0	0	0	0	0	0	0	0	0	0	0	0	0	0	0	0	0	0	0	0	0	0
NECTIN2	0	0	0	0	0	1	0	0	0	0	0	1	1	1	2	0	1	0	0	1	1	1	0	0	0	0	0	0	0	0	0	0	1	1	0	1	0	0	0	0	2	3	0	0	0	1	0	1	0
PPM1B	0	0	0	0	0	1	0	1	0	0	0	0	0	0	0	0	0	0	0	0	0	0	0	0	0	0	0	0	1	1	0	0	1	0	0	0	0	0	0	0	0	0	0	0	0	0	0	0	0
PSMA6	0	0	0	0	0	1	2	0	0	0	0	0	0	0	2	0	0	0	0	0	0	0	0	1	1	0	0	0	0	0	0	0	0	0	0	0	0	0	0	0	0	0	0	0	0	4	4	4	3
RAB1C	0	0	0	0	0	1	0	0	0	0	0	0	0	0	0	0	0	0	0	0	0	0	2	0	0	0	0	0	0	0	0	0	1	0	0	0	0	0	0	0	0	1	0	0	0	0	0	0	0
RAB40C	0	0	0	0	0	1	1	0	0	0	0	0	1	1	1	0	1	1	1	1	1	1	2	1	0	1	1	1	0	2	1	2	1	2	1	1	1	2	0	1	0	0	2	0	0	1	0	1	1
RHOC	0	0	0	0	0	1	0	0	0	0	0	0	0	0	0	0	0	0	0	0	0	0	0	0	0	0	0	0	0	0	0	0	0	0	0	0	0	0	0	0	0	0	0	0	0	0	0	0	0
RPS21	0	0	0	0	0	1	0	0	0	1	1	0	0	0	0	0	1	0	0	0	0	0	0	0	0	0	0	0	0	0	0	0	0	0	0	0	0	0	0	0	0	0	0	0	0	0	0	0	0
RPS4Y1	0	0	0	0	0	1	0	0	0	0	0	0	0	0	0	3	0	0	0	0	0	0	0	0	0	0	0	0	0	0	0	0	0	0	0	0	0	0	0	0	0	0	0	0	0	0	2	0	0
SERPINF1	0	0	0	0	0	1	1	1	0	0	1	1	0	0	0	2	0	1	0	1	1	2	2	1	3	2	2	0	1	1	0	3	0	0	0	0	0	0	0	0	0	0	0	1	0	0	0	1	0
SNRPE	0	0	0	0	0	1	0	0	0	0	1	1	1	1	0	0	1	1	0	0	0	1	1	0	0	0	0	0	0	0	1	0	0	0	0	0	1	0	0	0	0	0	0	0	0	0	0	0	0
TP53	0	0	0	0	0	35	30	103	0	0	0	0	0	0	0	0	0	0	0	0	0	0	0	0	0	0	0	0	0	0	0	0	0	0	0	0	0	0	0	0	0	0	0	0	0	0	0	0	0
WNT5A	0	0	0	0	0	1	0	0	0	0	0	0	1	0	0	0	0	0	0	0	0	0	0	0	0	0	0	0	0	0	0	0	0	0	0	0	0	0	0	0	0	0	0	0	0	0	0	0	0
A1BG	0	0	0	0	0	0	1	0	1	0	0	0	1	0	0	0	0	0	0	1	0	0	0	0	1	0	1	0	0	0	0	1	0	0	0	0	0	0	0	1	0	0	0	0	0	0	0	0	0
ACP1	0	0	0	0	0	0	1	0	1	2	1	1	0	0	0	0	0	0	0	0	0	0	0	0	0	0	0	0	0	0	0	0	1	0	0	0	0	0	0	0	0	0	0	0	0	0	0	0	0
ACTR1B	0	0	0	0	0	0	1	0	0	0	0	0	0	1	0	0	0	0	0	0	0	0	0	0	0	0	0	0	0	0	0	0	0	0	0	0	0	0	0	0	0	0	0	0	0	0	0	0	0
AFP	0	0	0	0	0	0	1	2	0	1	0	2	0	0	2	0	1	1	0	2	1	1	2	0	2	2	1	0	0	1	0	1	2	0	0	0	0	0	1	1	1	1	1	1	2	0	1	1	0
AKR1B1	0	0	0	0	0	0	1	0	0	0	0	1	1	0	1	0	2	2	0	1	1	0	0	0	1	1	0	1	2	2	1	0	1	0	0	0	1	1	1	0	1	0	1	0	0	0	0	0	1
AP1B1	0	0	0	0	0	0	1	0	0	0	1	0	0	0	0	0	0	0	0	1	0	0	0	0	0	0	0	0	0	0	0	0	0	0	0	0	0	0	0	0	0	0	1	0	0	0	0	0	0
CHMP6	0	0	0	0	0	0	1	0	0	0	0	1	1	1	1	1	0	0	1	0	0	0	0	0	0	0	0	0	0	1	0	0	0	0	0	0	0	0	0	0	0	2	0	0	0	0	0	1	1
CHST14	0	0	0	0	0	0	1	0	0	0	0	0	0	0	0	1	0	0	0	0	0	0	0	0	0	0	0	0	0	0	0	0	0	0	0	0	0	0	0	0	0	0	0	0	0	0	0	0	0
COPS3	0	0	0	0	0	0	1	0	1	1	1	0	0	0	0	1	0	0	0	0	0	0	0	0	0	1	1	0	0	0	0	0	0	1	0	0	1	1	1	0	1	0	1	3	1	0	0	1	1
CRMP1	0	0	0	0	0	0	1	1	0	0	0	0	0	0	0	0	0	0	0	0	0	0	0	0	0	0	0	0	0	0	0	1	0	0	0	0	0	0	0	1	0	0	0	0	0	0	0	0	0
DSC1	0	0	0	0	0	0	1	0	0	0	0	0	0	0	0	0	0	0	0	0	0	0	0	0	0	0	0	0	0	0	0	0	0	0	0	0	0	0	1	0	0	0	0	1	1	0	0	0	0
EEA1	0	0	0	0	0	0	1	0	0	0	0	0	0	0	0	0	0	0	0	0	0	0	0	0	0	0	0	0	0	0	0	0	0	0	0	0	0	0	0	0	0	0	0	0	0	0	0	0	0
EIF4E	0	0	0	0	0	0	1	0	0	1	0	0	0	0	0	0	1	1	0	0	0	0	2	0	0	0	0	0	0	1	0	0	0	0	0	0	2	0	1	2	0	0	0	1	1	0	0	0	0
EPPK1	0	0	0	0	0	0	1	0	0	0	0	0	0	0	0	0	0	0	0	0	0	0	0	0	0	0	0	0	0	0	0	0	0	0	0	0	0	0	0	0	2	0	0	0	0	0	0	0	0
ETFA	0	0	0	0	0	0	1	0	0	0	0	0	0	0	0	0	0	0	0	0	0	0	0	0	0	0	0	0	0	0	0	0	0	0	0	0	0	0	0	0	0	0	0	0	0	0	0	0	0
FLNB	0	0	0	0	0	0	1	0	0	0	0	0	0	0	0	0	0	0	0	0	0	0	0	0	0	0	0	0	0	0	0	0	1	1	0	0	0	0	0	0	0	0	0	0	0	0	0	0	0
GIPC1	0	0	0	0	0	0	1	3	0	1	0	0	1	2	3	0	1	0	0	0	1	0	0	0	0	0	0	0	0	0	0	0	2	0	0	0	0	0	0	0	3	2	0	0	0	0	0	0	0
GNAT3	0	0	0	0	0	0	1	0	0	0	0	0	0	0	0	0	0	0	0	0	0	0	0	0	0	0	0	0	0	0	1	0	0	0	0	0	0	0	0	0	0	0	0	0	0	0	0	0	0
GOLPH3L	0	0	0	0	0	0	1	1	1	1	1	0	0	0	0	0	0	0	0	0	1	1	0	0	0	0	0	1	0	0	0	0	1	0	0	0	0	0	0	0	0	1	0	1	0	0	0	0	0
HSPA1L	0	0	0	0	0	0	18	0	0	0	0	0	0	0	0	0	0	0	0	0	0	0	0	0	0	0	0	9	0	0	0	0	0	0	0	0	0	0	0	0	0	0	0	0	0	0	0	0	0
HSPA9	0	0	0	0	0	0	1	0	0	0	0	0	0	0	0	0	0	0	0	0	0	0	0	0	0	0	0	0	0	0	0	0	0	0	0	0	0	0	1	0	0	0	0	0	0	0	3	0	0
HSPE1	0	0	0	0	0	0	1	0	0	0	0	0	0	0	0	0	0	0	0	0	0	0	0	0	0	0	0	0	0	0	0	0	0	0	0	0	0	0	0	0	0	0	0	0	0	0	0	0	0
ITIH1	0	0	0	0	0	0	1	0	0	0	0	0	0	0	0	0	0	0	0	1	0	1	0	1	0	1	0	0	0	0	0	0	0	0	0	0	0	0	0	0	0	0	0	0	0	0	0	0	0
ITIH4	0	0	0	0	0	0	1	2	0	1	1	2	1	0	0	1	2	0	1	0	0	2	1	1	1	0	0	0	0	1	0	0	1	0	0	0	0	0	0	0	0	0	0	0	1	0	1	0	1
ITM2B	0	0	0	0	0	0	1	0	1	1	1	2	0	0	0	0	1	1	0	1	0	1	0	0	1	1	0	0	0	0	0	0	1	0	0	0	0	0	0	0	1	0	1	1	0	0	0	1	1
JAM3	0	0	0	0	0	0	1	1	1	0	1	1	0	2	1	1	0	1	0	0	0	0	1	0	0	0	0	0	1	0	0	0	1	0	2	1	0	0	0	0	0	1	0	0	0	0	0	1	1
KPNA5	0	0	0	0	0	0	1	1	0	0	1	0	0	0	0	0	0	1	0	0	0	0	0	0	0	0	0	0	0	0	0	0	0	0	0	0	0	0	0	0	0	0	0	0	0	0	0	0	0
LDHAL6B	0	0	0	0	0	0	1	0	0	0	0	0	0	0	0	0	0	0	0	1	1	0	0	0	0	0	0	0	0	0	0	0	0	0	0	0	0	0	0	0	0	0	0	0	0	0	0	0	0
LMAN2	0	0	0	0	0	0	1	1	1	1	1	1	1	1	0	0	1	1	0	2	1	0	0	0	0	0	0	0	1	0	0	0	2	0	0	0	1	0	1	0	1	1	0	1	1	1	0	1	2
LUM	0	0	0	0	0	0	1	0	0	0	0	0	0	0	0	0	0	0	0	1	2	0	0	0	2	0	2	0	0	0	0	0	0	0	0	0	0	0	0	0	0	0	0	0	0	0	0	0	0
PFKL	0	0	0	0	0	0	1	1	5	4	6	2	0	0	0	0	2	4	1	1	0	3	2	7	1	0	0	1	2	2	0	0	0	0	0	0	2	0	3	1	3	2	1	0	0	0	0	0	0
PICALM	0	0	0	0	0	0	1	0	0	0	0	0	0	0	0	0	0	0	0	0	0	0	0	0	0	0	0	0	0	0	0	0	1	0	0	0	0	0	0	0	0	0	0	0	0	0	0	0	0
PKP1	0	0	0	0	0	0	1	0	0	0	0	0	0	0	0	0	0	0	0	0	0	0	0	0	0	0	0	0	0	0	0	0	0	0	0	0	0	0	0	0	5	0	0	0	1	0	0	0	0
PPID	0	0	0	0	0	0	1	4	1	0	0	0	0	0	0	0	0	0	0	1	0	0	1	1	1	0	0	0	0	0	0	0	0	0	0	0	0	0	0	0	1	1	0	0	0	0	0	0	0
PPIH	0	0	0	0	0	0	2	1	0	0	0	0	0	0	0	0	0	0	0	0	0	1	1	1	0	0	1	0	0	0	0	0	1	0	0	0	0	0	0	0	1	3	0	2	0	0	0	1	1
PPP1CC	0	0	0	0	0	0	1	2	3	3	3	1	0	0	1	1	2	2	0	1	0	4	4	5	1	0	1	4	3	2	3	0	2	1	0	0	4	1	0	1	0	1	0	4	4	0	0	0	0
PSMA2	0	0	0	0	0	0	1	0	0	0	0	0	0	0	2	0	0	0	0	0	0	2	1	1	0	0	2	0	0	0	0	0	1	0	0	0	0	0	0	0	1	1	1	1	1	3	1	4	6
PSMA5	0	0	0	0	0	0	1	0	0	0	0	0	1	0	1	0	0	0	0	0	0	0	3	1	0	0	0	1	0	0	0	0	1	0	0	0	0	0	1	0	1	2	1	1	0	4	2	5	4
PSMB5	0	0	0	0	0	0	1	0	0	0	0	0	1	0	2	0	0	0	0	0	0	0	3	0	0	0	0	0	0	0	0	0	0	0	0	0	0	0	1	0	0	1	0	0	0	8	3	2	3
RPL22	0	0	0	0	0	0	1	0	1	1	2	0	0	1	0	0	0	0	0	0	0	2	0	0	0	0	0	1	0	1	0	0	0	0	0	0	0	0	0	0	0	0	0	0	0	0	0	0	0
SKP1	0	0	0	0	0	0	1	1	1	1	0	0	0	0	0	0	0	0	0	0	0	1	1	1	0	0	0	0	0	0	0	0	1	0	0	0	0	0	0	0	0	0	0	0	0	0	0	0	1
SLC2A1	0	0	0	0	0	0	1	0	0	1	0	3	3	3	1	0	3	2	2	1	2	3	2	4	0	0	1	1	0	0	1	0	4	1	2	1	1	2	3	1	1	4	1	1	1	4	1	2	2
SRM	0	0	0	0	0	0	1	0	0	1	3	2	0	0	1	0	0	0	1	0	0	1	2	1	2	0	0	1	1	2	1	0	0	0	0	0	3	0	0	1	2	2	0	0	0	0	0	0	0
SRP14	0	0	0	0	0	0	1	0	0	0	0	0	0	0	0	0	0	0	0	0	0	0	0	0	0	0	0	0	0	0	0	0	0	0	0	0	0	1	0	0	0	1	0	1	0	0	0	0	0
STAM2	0	0	0	0	0	0	3	0	0	0	0	0	1	0	2	0	0	0	0	0	0	0	0	0	0	0	0	0	0	0	0	0	0	0	0	0	0	0	0	0	0	0	0	0	0	0	0	0	0
SYPL1	0	0	0	0	0	0	1	0	1	0	0	1	0	0	0	0	1	1	1	1	1	0	0	0	0	0	0	0	0	0	0	0	1	0	0	0	0	0	0	0	1	0	0	0	0	0	0	1	1
TKT	0	0	0	0	0	0	1	0	1	0	1	0	1	1	2	0	1	1	0	0	0	1	0	1	0	0	0	0	0	0	0	0	0	0	0	0	0	0	10	0	2	0	0	8	10	0	1	0	0
TOM1L1	0	0	0	0	0	0	1	1	0	0	0	0	1	0	0	0	0	0	0	1	0	0	0	0	0	0	0	0	0	0	0	0	1	0	0	0	0	0	0	0	0	0	0	0	0	1	1	0	0
TOMM22	0	0	0	0	0	0	1	0	0	0	0	0	0	0	0	0	0	0	0	0	0	0	0	0	0	0	0	0	0	0	0	0	0	0	0	0	0	0	0	0	0	0	0	0	0	0	0	0	0
TXNRD1	0	0	0	0	0	0	1	0	0	0	0	0	0	0	0	0	0	0	0	0	0	0	0	0	0	0	0	0	0	0	0	0	0	0	0	0	0	0	0	0	0	0	0	0	0	0	0	0	0
UBE2V1	0	0	0	0	0	0	1	0	0	0	0	0	1	1	2	0	0	0	0	0	0	0	2	0	0	0	0	0	0	0	0	0	0	0	0	0	0	0	0	0	1	1	0	0	0	2	0	1	1
UBXN4	0	0	0	0	0	0	1	0	0	0	1	0	0	0	0	0	0	0	0	0	0	0	0	0	0	0	0	0	0	0	0	0	0	0	0	0	0	1	0	0	0	0	0	0	0	0	0	0	0
VDAC1	0	0	0	0	0	0	2	0	0	0	0	0	0	0	0	0	0	0	0	0	0	0	0	0	0	0	0	0	0	0	0	0	0	0	0	0	0	0	0	0	0	0	0	0	0	0	0	0	0
VDAC2	0	0	0	0	0	0	1	0	0	0	0	0	0	0	0	0	0	0	0	0	0	0	0	0	0	0	0	0	0	0	0	0	0	0	0	0	0	0	0	0	0	0	0	0	0	0	0	0	0
XPO1	0	0	0	0	0	0	1	3	0	0	1	0	0	0	0	0	0	3	0	0	0	2	1	0	0	0	0	0	0	1	0	0	0	0	0	0	0	1	1	0	1	2	0	2	3	0	0	0	0
YBX3	0	0	0	0	0	0	3	10	0	0	0	0	5	0	0	0	0	0	0	0	0	0	1	3	0	0	0	0	0	0	0	0	0	0	0	0	0	0	0	0	0	0	0	0	0	0	0	3	3
YES1	0	0	0	0	0	0	2	2	0	2	0	1	3	0	1	0	3	1	0	1	1	1	3	1	1	1	2	0	2	1	0	0	2	0	0	2	1	2	0	0	2	5	1	0	1	0	0	1	0
ACOT7	0	0	0	0	0	0	0	1	0	0	1	0	1	0	0	0	0	0	0	0	0	1	2	1	0	0	0	0	0	1	1	0	0	0	0	0	0	0	1	0	0	0	0	1	1	0	0	0	0
ACSL4	0	0	0	0	0	0	0	1	0	0	0	0	3	2	3	0	0	0	1	0	1	0	0	0	0	0	0	0	0	0	0	0	0	0	0	0	0	0	0	0	0	0	0	0	0	0	0	0	1
AHSA1	0	0	0	0	0	0	0	1	0	0	0	0	0	0	0	0	0	0	0	0	0	0	1	0	0	0	0	0	0	0	0	0	0	0	0	0	0	0	0	0	0	1	0	0	0	0	0	0	0
AIDA	0	0	0	0	0	0	0	1	0	0	0	0	0	0	0	0	0	0	0	0	0	0	0	0	0	0	0	0	0	0	0	0	0	0	0	0	0	0	0	0	1	1	0	3	1	0	0	0	0
AIMP2	0	0	0	0	0	0	0	1	1	2	2	1	0	1	0	1	1	1	0	0	0	1	1	2	1	1	1	1	1	1	0	0	1	0	0	0	0	1	0	0	2	1	1	2	1	0	0	1	0
AP2B1	0	0	0	0	0	0	0	1	0	0	0	2	0	0	0	0	0	0	0	0	0	0	0	0	0	0	0	0	0	0	0	0	0	0	0	0	0	0	0	0	2	1	0	1	0	2	0	0	0
APP	0	0	0	0	0	0	0	1	0	0	0	0	1	0	0	0	0	0	0	0	0	0	0	0	0	0	0	0	0	0	0	0	0	0	0	0	0	0	0	0	0	0	0	0	0	0	0	1	0
ARL3	0	0	0	0	0	0	0	1	1	0	1	0	0	0	1	0	0	0	0	0	0	0	0	0	0	0	0	0	1	0	0	0	0	0	0	0	0	0	0	0	0	0	0	0	0	0	0	0	1
ARPC2	0	0	0	0	0	0	0	1	0	0	0	0	0	0	0	0	0	1	0	0	0	0	0	0	0	0	0	0	0	0	0	0	0	0	0	0	0	0	0	0	0	0	1	0	0	0	0	0	0
ATP1B1	0	0	0	0	0	0	0	1	0	0	0	2	2	3	2	1	0	1	0	0	0	1	0	0	0	0	0	0	0	0	0	0	0	0	0	0	0	0	0	0	1	1	0	0	0	1	0	1	1
ATP6V1B1	0	0	0	0	0	0	0	1	0	1	0	0	0	0	0	0	0	0	0	0	0	0	0	0	0	0	0	0	0	0	0	0	0	0	0	0	0	0	0	0	0	0	0	0	0	0	0	0	0
BANF1	0	0	0	0	0	0	0	1	0	0	2	0	1	0	0	0	0	0	0	0	0	0	0	0	0	0	0	0	0	0	0	0	0	0	0	0	0	0	0	0	0	0	0	0	0	0	0	1	0
BCO1	0	0	0	0	0	0	0	1	0	0	0	0	1	0	1	0	0	0	2	1	1	1	1	1	1	1	2	0	1	1	1	1	0	1	1	1	1	1	0	1	0	1	1	0	0	0	0	1	1
C14orf166	0	0	0	0	0	0	0	1	0	0	0	0	0	0	0	0	0	0	0	0	0	1	1	0	0	0	0	0	0	0	0	0	2	0	0	0	0	1	0	0	0	0	0	0	0	2	0	2	0
CACNA2D1	0	0	0	0	0	0	0	1	0	0	0	0	4	1	1	0	0	0	0	0	0	0	0	0	0	0	0	0	0	0	0	0	0	0	0	0	0	0	0	0	4	7	0	2	0	1	0	3	1
CACYBP	0	0	0	0	0	0	0	5	0	0	0	0	0	2	0	0	0	0	0	0	0	6	3	6	0	0	0	0	0	0	0	0	0	0	0	0	0	0	0	0	0	0	0	0	0	0	0	1	0
CADM1	0	0	0	0	0	0	0	1	0	0	0	0	2	1	2	0	0	0	0	0	0	0	0	0	0	0	0	0	0	0	0	0	0	0	0	0	0	0	0	0	0	0	0	0	0	0	0	0	0
CAPN7	0	0	0	0	0	0	0	2	0	0	0	0	0	0	0	0	0	0	0	1	0	6	4	6	0	0	4	0	0	0	0	0	1	0	0	0	0	3	0	0	1	1	2	0	0	0	0	1	1
CD109	0	0	0	0	0	0	0	1	0	0	0	0	0	0	0	0	0	0	0	1	0	0	0	0	0	0	0	0	0	0	0	0	0	0	0	0	0	0	0	0	2	4	0	0	0	0	0	0	0
CD99L2	0	0	0	0	0	0	0	2	2	1	1	1	4	2	3	0	1	1	1	2	0	2	1	2	0	0	1	1	1	1	1	0	2	0	2	0	1	2	2	0	1	3	1	2	2	1	0	2	1
CDC37	0	0	0	0	0	0	0	6	0	0	0	0	0	1	0	0	0	0	0	0	0	1	0	0	0	0	0	0	0	0	0	0	0	0	0	0	0	0	1	0	0	0	0	0	0	0	0	0	0
CDC42SE2	0	0	0	0	0	0	0	1	0	0	0	0	1	0	0	0	0	0	0	0	0	0	0	0	0	0	0	0	0	0	0	0	0	0	0	0	0	0	0	0	0	0	0	0	0	0	0	0	0
CFAP100	0	0	0	0	0	0	0	1	1	0	0	0	0	0	0	1	1	0	0	0	1	0	1	0	0	1	0	0	0	1	0	0	0	0	0	0	0	0	0	0	0	1	0	1	0	0	0	0	0
CHMP1B	0	0	0	0	0	0	0	1	0	0	0	1	1	1	0	1	4	2	2	2	2	2	2	1	1	0	0	0	2	2	1	1	1	7	3	2	0	1	1	0	0	2	0	0	0	1	2	2	2
CHMP4C	0	0	0	0	0	0	0	1	0	0	0	0	3	0	0	0	0	2	0	0	0	0	0	0	0	0	1	0	0	2	0	0	0	0	0	0	0	1	0	0	2	3	0	0	0	0	0	0	1
CLDND1	0	0	0	0	0	0	0	1	0	0	0	0	0	1	1	0	2	1	0	1	0	2	2	1	0	0	1	1	1	1	0	0	1	0	0	0	1	1	1	0	1	2	0	0	0	0	0	1	0
CMTM6	0	0	0	0	0	0	0	1	0	0	0	0	1	1	0	0	0	0	0	1	1	1	2	0	0	0	0	0	0	0	0	0	0	0	0	0	0	0	0	0	1	1	0	0	0	0	0	0	0
CNTN1	0	0	0	0	0	0	0	1	0	0	0	0	1	0	0	0	0	0	0	1	1	0	0	2	0	0	0	0	0	0	0	0	0	0	0	0	0	0	0	0	3	1	0	0	0	0	0	0	2
COL6A1	0	0	0	0	0	0	0	1	0	0	0	0	0	0	0	0	0	0	0	0	0	0	0	0	0	1	0	0	0	0	0	0	0	0	0	0	0	0	0	0	0	0	0	1	0	0	0	0	0
COPE	0	0	0	0	0	0	0	1	3	4	6	0	0	0	0	0	0	4	0	0	1	4	0	2	0	0	0	0	0	2	0	0	0	0	0	0	1	1	2	2	2	0	0	1	3	0	0	0	0
CSE1L	0	0	0	0	0	0	0	2	2	3	4	2	0	0	0	1	1	2	0	0	0	1	0	0	1	1	0	0	0	1	0	0	0	0	0	0	0	0	1	0	4	3	1	4	2	0	0	0	0
CSPG5	0	0	0	0	0	0	0	1	0	0	0	0	1	0	2	0	0	0	0	0	0	0	0	0	0	0	0	0	0	0	0	0	0	0	0	0	0	0	0	0	0	0	0	0	0	0	0	0	0
CTNNA1	0	0	0	0	0	0	0	2	0	1	1	6	6	2	6	0	0	0	0	0	0	0	0	0	0	0	0	0	0	1	0	0	2	1	0	0	0	0	0	0	2	2	0	0	0	0	0	0	0
DCXR	0	0	0	0	0	0	0	1	0	0	0	0	0	0	0	0	0	0	0	0	0	0	0	0	0	0	0	0	0	0	0	0	0	0	0	0	0	0	0	0	0	0	0	0	0	0	0	0	0
DENR	0	0	0	0	0	0	0	1	0	0	0	0	1	0	1	0	0	0	0	0	0	0	0	0	0	0	0	0	0	0	0	0	0	0	0	0	0	0	0	0	1	1	0	0	0	0	0	0	1
DNAJB1	0	0	0	0	0	0	0	1	0	0	0	0	0	0	0	0	0	0	0	0	0	1	1	1	0	0	1	0	0	0	0	0	0	0	0	0	0	0	0	0	2	1	1	0	0	1	0	0	0
DPYSL3	0	0	0	0	0	0	0	1	0	0	0	0	0	0	0	0	0	0	0	0	0	0	0	0	0	0	0	0	0	0	0	0	0	0	0	0	0	0	0	0	0	0	0	0	0	0	0	0	0
EDC4	0	0	0	0	0	0	0	4	0	0	0	0	0	0	0	0	0	0	0	0	0	0	0	1	0	0	0	0	0	1	0	0	0	0	0	0	0	0	0	0	0	0	0	0	0	0	0	0	0
EGFR	0	0	0	0	0	0	0	1	0	0	0	0	0	0	0	0	0	0	0	0	0	0	1	0	0	0	0	0	0	0	0	0	0	0	0	0	0	0	0	0	0	0	0	0	0	0	0	0	0
EIF1B	0	0	0	0	0	0	0	1	0	0	0	0	0	0	0	0	0	0	0	0	0	0	0	1	0	0	0	0	0	0	0	0	0	0	0	0	0	0	0	0	0	0	1	0	0	0	0	0	0
EIF4E1B	0	0	0	0	0	0	0	1	0	0	1	0	0	1	0	0	0	0	0	0	0	1	0	0	0	0	0	0	1	0	0	0	0	0	0	0	0	0	0	0	0	0	1	0	0	0	0	0	0
EIF4G3	0	0	0	0	0	0	0	1	1	1	1	0	0	0	0	0	1	0	0	0	0	0	0	0	0	0	0	0	1	1	0	0	0	0	0	0	1	0	0	0	0	0	1	0	1	1	1	3	3
EML2	0	0	0	0	0	0	0	1	0	1	0	0	0	0	0	0	0	0	0	1	0	0	0	0	0	0	1	1	1	1	0	0	0	0	0	0	0	0	1	0	0	0	0	1	1	0	0	0	0
EPHA2	0	0	0	0	0	0	0	1	0	0	0	1	3	1	2	0	1	0	5	1	1	3	2	1	0	0	2	0	1	1	1	0	5	0	0	1	2	1	4	0	2	1	1	1	1	1	1	0	0
FAF1	0	0	0	0	0	0	0	1	0	0	0	0	0	0	2	0	0	0	0	0	0	3	4	3	0	0	1	0	0	0	0	0	0	0	0	0	0	0	0	0	0	0	0	0	0	0	0	1	0
FAM120A	0	0	0	0	0	0	0	2	1	1	1	0	0	0	0	0	0	0	0	0	0	0	1	0	0	0	0	0	1	1	0	0	0	0	0	0	0	0	0	0	0	0	0	1	0	0	0	0	0
FAM49A	0	0	0	0	0	0	0	1	0	0	0	0	0	0	0	0	0	0	0	0	0	0	0	0	0	0	0	0	0	0	0	0	0	0	0	0	0	0	0	0	0	0	0	0	0	0	0	0	0
FAM98A	0	0	0	0	0	0	0	1	0	0	0	0	0	0	0	0	0	0	0	0	0	0	0	0	0	0	0	0	0	0	0	0	0	0	0	0	0	0	0	0	1	0	0	0	0	0	0	0	0
FAS	0	0	0	0	0	0	0	1	0	0	0	0	0	0	0	0	0	0	0	0	0	1	1	2	0	0	0	0	0	0	0	0	1	0	1	0	0	2	2	0	1	1	0	0	0	0	0	0	0
FERMT2	0	0	0	0	0	0	0	2	0	0	0	0	0	0	0	0	0	0	0	0	0	0	0	0	0	0	0	0	0	1	0	0	3	0	1	0	0	0	0	1	4	5	5	4	2	0	0	2	1
GFPT2	0	0	0	0	0	0	0	1	0	0	0	0	0	0	0	0	0	0	0	0	0	0	0	0	0	1	0	0	0	0	0	0	0	0	0	0	0	1	0	0	0	0	1	0	0	1	0	0	0
GJC1	0	0	0	0	0	0	0	1	0	0	0	1	2	1	1	0	0	0	0	0	0	0	0	0	0	0	0	0	0	0	0	0	0	0	0	0	0	0	0	0	0	0	0	0	0	0	0	0	0
GLOD4	0	0	0	0	0	0	0	1	0	0	0	0	0	0	0	0	0	0	0	0	0	0	0	0	0	0	0	0	1	0	0	0	0	0	0	0	0	0	0	0	0	0	0	0	0	0	0	0	0
GNA13	0	0	0	0	0	0	0	3	0	0	0	1	8	6	9	1	2	0	2	1	0	2	3	1	0	0	2	1	0	3	1	0	2	0	0	0	1	0	0	1	2	0	3	0	0	2	0	0	0
GNG10	0	0	0	0	0	0	0	1	0	0	0	0	0	1	1	0	0	0	0	0	0	0	1	0	0	0	0	0	0	0	0	0	0	0	0	0	0	0	0	0	0	0	0	0	0	0	0	0	0
GORASP1	0	0	0	0	0	0	0	1	0	0	0	0	0	0	0	0	0	0	0	0	0	0	0	0	0	0	0	0	0	0	0	0	0	0	0	0	0	0	0	0	0	0	0	0	0	0	0	0	0
GSTA5	0	0	0	0	0	0	0	1	0	0	0	0	0	0	0	0	0	0	0	0	0	0	0	0	0	0	0	0	0	0	0	0	0	0	0	0	0	0	0	0	0	0	0	0	0	0	0	0	0
GSTM2	0	0	0	0	0	0	0	1	0	0	0	0	0	0	0	0	0	2	0	0	0	0	0	0	0	0	0	0	0	0	0	0	0	0	0	0	0	0	0	0	0	0	0	0	0	0	0	0	0
GSTP1	0	0	0	0	0	0	0	1	1	0	0	1	0	0	2	0	0	0	0	0	0	1	1	0	0	0	0	0	0	0	0	0	1	0	0	0	0	0	0	0	0	0	0	0	0	0	1	0	0
HNRNPDL	0	0	0	0	0	0	0	1	1	0	2	0	2	3	2	0	0	0	0	0	0	1	0	1	0	0	0	0	0	0	0	0	0	0	0	0	0	0	1	0	0	0	0	0	0	1	0	0	0
HSP90AB4P	0	0	0	0	0	0	0	1	0	0	0	0	0	0	0	0	0	0	0	0	0	1	0	1	0	0	0	0	0	0	0	0	0	0	0	0	0	0	0	0	0	0	0	0	0	0	0	0	0
HSPH1	0	0	0	0	0	0	0	4	1	0	0	1	0	0	0	2	0	1	0	0	0	1	1	0	0	0	0	0	1	1	0	0	1	0	0	0	0	0	0	0	1	2	0	0	0	0	0	0	0
IPO7	0	0	0	0	0	0	0	1	1	2	2	0	1	1	1	0	1	1	0	0	0	0	0	0	0	0	0	0	1	1	0	0	0	0	0	0	1	1	1	0	1	2	1	2	1	0	0	0	0
ITCH	0	0	0	0	0	0	0	3	0	0	0	0	4	0	2	0	0	0	0	0	0	0	0	0	0	0	0	0	0	0	0	0	0	0	0	0	0	0	0	0	0	0	0	0	0	0	0	0	0
KCTD12	0	0	0	0	0	0	0	1	0	0	0	0	0	0	0	0	0	0	0	0	0	0	0	0	0	0	0	0	0	0	0	0	0	0	0	0	0	0	0	0	0	0	0	0	0	0	0	0	0
KPNA3	0	0	0	0	0	0	0	1	0	0	0	0	0	0	0	0	0	0	0	0	0	0	0	0	0	0	0	0	0	0	0	0	0	0	0	0	0	0	0	0	0	0	0	0	0	0	0	0	0
LAMP2	0	0	0	0	0	0	0	1	0	0	0	0	0	0	0	0	0	0	0	0	0	0	0	0	0	0	0	0	0	0	0	0	1	0	0	0	0	0	0	0	0	0	0	0	0	0	2	1	0
LANCL2	0	0	0	0	0	0	0	1	0	0	0	0	0	0	0	0	0	0	0	0	0	0	0	1	0	0	0	0	0	0	0	0	0	0	0	0	0	0	0	0	0	0	0	0	0	0	0	0	0
LRRC57	0	0	0	0	0	0	0	1	0	0	0	0	1	2	0	0	0	0	0	0	0	0	0	1	0	0	0	0	1	1	0	0	2	0	0	0	0	0	0	0	2	2	0	1	0	2	1	2	2
LSM14A	0	0	0	0	0	0	0	3	0	0	0	0	0	0	0	0	0	0	0	0	0	0	0	0	0	0	0	0	0	0	0	0	0	0	0	0	0	0	0	0	2	2	1	0	0	0	0	0	1
LSM14B	0	0	0	0	0	0	0	1	0	0	0	0	0	0	0	0	0	0	0	0	0	0	0	0	0	0	0	0	0	0	0	0	0	0	0	0	0	0	0	0	2	2	0	2	2	0	0	0	0
LSM4	0	0	0	0	0	0	0	1	0	0	0	0	0	0	0	0	0	0	0	0	0	0	0	0	0	0	0	0	0	0	0	0	0	0	0	0	0	0	0	0	0	0	0	0	0	0	0	0	0
LYPLA2	0	0	0	0	0	0	0	1	1	0	0	0	0	0	0	0	1	0	0	0	0	0	1	1	0	0	1	0	0	0	0	0	0	0	0	0	0	0	1	0	0	0	0	0	0	0	0	0	0
MAP2K1	0	0	0	0	0	0	0	1	1	0	1	0	0	0	1	0	0	1	0	1	1	0	1	0	0	1	1	0	0	0	0	2	1	0	0	0	1	1	0	1	1	0	1	1	0	0	0	0	0
MFAP4	0	0	0	0	0	0	0	1	0	0	0	0	0	0	0	0	0	0	0	0	0	0	0	0	0	0	0	0	0	0	0	0	0	0	0	0	0	0	0	0	0	0	0	0	0	0	0	0	0
MOB1B	0	0	0	0	0	0	0	1	0	0	0	1	0	0	0	0	0	0	0	0	0	0	0	0	0	0	0	1	2	1	2	0	4	0	0	0	0	0	0	0	4	3	0	2	2	0	0	0	0
NACA	0	0	0	0	0	0	0	1	0	0	0	0	0	1	0	0	0	0	0	0	0	0	0	0	0	0	0	0	0	1	0	0	0	0	0	0	0	0	0	0	0	0	0	0	0	0	0	0	0
NCKAP1	0	0	0	0	0	0	0	1	0	0	0	1	1	0	0	0	0	0	0	0	0	0	0	0	0	0	0	0	0	0	0	0	0	0	0	0	0	0	0	0	0	0	0	0	0	0	0	0	0
NCSTN	0	0	0	0	0	0	0	3	0	0	0	0	2	2	3	0	0	1	2	1	1	2	2	1	0	0	1	0	0	0	0	0	0	0	3	3	0	3	2	0	1	0	1	1	0	3	0	2	1
NECTIN3	0	0	0	0	0	0	0	1	0	0	0	2	0	0	0	0	0	0	0	0	0	3	1	0	0	0	1	0	0	0	0	0	1	0	0	0	0	0	1	0	1	2	0	0	0	0	0	0	0
NEDD8	0	0	0	0	0	0	0	1	0	1	0	0	0	0	0	0	0	0	0	0	0	1	0	0	0	0	0	1	0	0	0	0	0	0	0	0	0	0	0	0	0	0	0	0	0	0	0	0	0
NEO1	0	0	0	0	0	0	0	1	0	0	0	0	0	0	0	0	0	0	0	0	1	0	0	1	0	0	0	0	0	0	0	0	0	0	0	0	0	0	1	0	0	0	0	0	0	0	0	0	0
NR3C1	0	0	0	0	0	0	0	1	1	1	1	1	0	0	0	1	1	1	0	0	0	0	0	0	0	0	0	0	1	1	0	0	0	0	0	0	0	0	0	0	0	0	0	0	0	0	2	0	0
NRN1	0	0	0	0	0	0	0	1	0	0	0	0	0	0	0	0	0	0	0	0	1	1	0	0	0	0	0	0	0	0	0	0	0	0	0	0	0	0	1	0	1	1	0	0	0	0	0	0	0
NUCB1	0	0	0	0	0	0	0	1	0	0	0	0	0	0	0	0	0	0	0	0	0	0	0	0	0	0	0	0	0	0	0	0	0	0	0	0	0	0	0	0	0	0	0	0	0	0	0	0	0
NUDC	0	0	0	0	0	0	0	3	0	0	0	0	0	0	1	0	0	0	0	0	0	0	0	0	0	0	0	0	0	0	0	0	0	0	0	0	0	0	0	0	0	0	0	0	0	0	0	0	0
NUTF2	0	0	0	0	0	0	0	1	1	1	1	0	0	0	1	0	0	2	0	0	0	0	0	0	0	0	0	0	0	0	0	0	0	0	0	0	0	0	0	0	1	1	0	1	1	0	0	0	0
PAICS	0	0	0	0	0	0	0	1	0	0	0	0	1	0	1	0	0	0	0	0	0	0	0	1	0	0	0	0	0	0	0	0	0	0	0	0	0	0	0	0	0	0	0	0	0	0	0	0	0
PARK7	0	0	0	0	0	0	0	1	0	0	0	0	0	0	0	0	0	0	0	0	0	0	0	0	0	0	0	0	0	0	0	0	0	0	0	0	0	0	0	0	0	1	0	0	0	0	0	0	0
PATL1	0	0	0	0	0	0	0	1	0	0	0	0	0	0	0	0	0	0	0	0	0	0	0	1	0	0	0	0	0	1	0	0	0	0	0	0	0	0	0	0	0	0	0	0	0	0	0	0	0
PCDH10	0	0	0	0	0	0	0	1	0	0	0	0	0	0	0	0	0	0	0	0	0	1	0	0	0	0	0	0	0	0	0	0	1	0	0	0	0	0	0	0	0	0	0	0	0	0	0	0	0
PCDH9	0	0	0	0	0	0	0	1	0	0	0	0	0	1	1	0	0	1	1	0	1	0	0	0	0	0	0	0	1	1	0	0	1	0	0	0	0	1	1	0	1	3	1	1	1	0	1	1	1
PDCD5	0	0	0	0	0	0	0	1	0	0	0	0	2	1	2	0	0	0	0	0	0	0	0	0	0	0	0	0	0	1	0	0	0	0	0	0	0	0	0	0	1	2	0	1	0	0	0	0	0
PFN2	0	0	0	0	0	0	0	1	0	1	1	0	0	1	1	0	0	0	0	0	0	1	1	0	0	0	0	1	0	0	0	0	1	0	0	0	1	0	0	0	1	1	1	1	0	0	0	0	0
PI4KA	0	0	0	0	0	0	0	1	0	1	0	0	0	1	0	0	0	1	0	0	0	0	0	0	0	0	0	0	0	0	0	0	0	0	0	0	0	0	0	0	0	0	0	0	0	0	0	0	0
PIN4	0	0	0	0	0	0	0	1	0	0	0	1	1	1	1	0	0	0	0	0	0	0	0	1	0	0	0	0	1	1	1	0	0	0	0	0	0	0	0	0	0	0	0	1	0	0	0	1	0
PIPSL	0	0	0	0	0	0	0	2	0	0	1	1	0	0	0	1	2	0	1	4	4	2	0	0	0	0	1	0	0	0	2	0	0	0	0	0	2	1	1	0	0	1	0	0	0	1	0	0	0
PLAA	0	0	0	0	0	0	0	1	0	0	0	0	0	0	0	0	0	0	0	0	0	1	0	2	0	0	0	0	0	0	0	0	0	0	0	0	0	0	0	0	0	0	0	0	1	0	0	0	0
PPIL1	0	0	0	0	0	0	0	1	0	0	0	0	2	1	5	0	0	1	0	0	0	1	1	0	0	0	0	0	2	3	0	0	1	0	0	0	0	0	1	0	3	3	3	2	2	1	0	1	1
PPP1R7	0	0	0	0	0	0	0	1	1	2	1	0	0	0	0	0	0	0	0	0	0	0	0	2	1	0	0	0	1	0	0	0	1	0	0	0	0	0	0	0	0	1	1	1	1	0	0	0	0
PPP5C	0	0	0	0	0	0	0	1	0	0	0	0	0	1	0	0	0	0	0	0	0	0	0	0	0	0	0	0	0	0	0	0	0	0	0	0	0	0	0	0	0	0	0	0	0	0	0	0	0
PSMA7	0	0	0	0	0	0	0	1	0	0	0	0	1	0	5	0	0	0	0	0	0	2	2	2	0	0	1	0	1	1	0	0	0	0	0	0	0	0	1	0	3	4	0	1	1	6	3	9	7
PSMB1	0	0	0	0	0	0	0	1	0	0	0	0	1	0	4	0	0	0	0	0	0	3	1	1	0	1	4	0	1	1	0	0	1	0	0	0	0	0	0	1	3	3	1	0	0	3	3	4	7
PSMB6	0	0	0	0	0	0	0	1	0	0	0	0	1	0	1	0	0	0	0	0	0	1	0	3	0	0	0	0	0	0	0	0	0	0	0	0	0	0	1	0	0	0	0	1	2	1	2	2	3
PURA	0	0	0	0	0	0	0	2	0	0	0	0	0	0	0	0	0	0	0	0	0	0	1	0	0	0	0	0	0	0	0	0	0	0	0	0	0	0	0	0	0	0	0	0	0	0	0	0	0
QDPR	0	0	0	0	0	0	0	1	0	1	0	0	0	0	0	1	0	0	0	0	0	0	1	1	0	0	0	0	0	0	0	0	0	0	0	0	0	0	0	0	0	0	0	0	1	0	0	0	0
QSOX2	0	0	0	0	0	0	0	1	0	0	0	0	1	0	0	0	0	0	0	0	0	1	0	0	0	0	0	0	1	0	0	0	1	0	0	0	0	0	0	0	0	0	0	0	0	0	0	0	0
RAB23	0	0	0	0	0	0	0	1	0	0	0	1	1	0	1	0	1	0	0	0	0	1	0	2	0	0	0	0	0	1	0	0	0	0	0	0	0	0	0	0	2	5	0	2	1	0	0	0	0
RAB34	0	0	0	0	0	0	0	1	0	0	0	0	0	2	1	0	0	0	0	0	0	0	0	0	0	0	0	0	1	0	0	0	0	0	0	0	0	0	0	0	3	2	0	0	0	0	0	0	0
RAB6A	0	0	0	0	0	0	0	1	2	2	2	2	0	1	0	0	0	1	0	0	1	0	0	1	0	0	0	0	2	3	0	0	0	0	0	0	1	0	0	0	2	3	0	2	1	0	0	1	1
ROCK1	0	0	0	0	0	0	0	1	1	0	0	0	0	0	0	0	0	0	0	0	0	0	0	0	0	0	0	0	0	1	0	0	0	0	0	0	0	0	0	0	0	0	0	0	0	0	0	0	0
RPS26	0	0	0	0	0	0	0	1	1	1	1	2	2	2	2	0	1	1	0	0	0	1	0	1	0	0	0	1	1	1	1	0	0	1	2	1	1	0	1	0	0	0	0	1	0	0	1	0	0
RSU1	0	0	0	0	0	0	0	1	0	0	0	0	0	0	0	0	0	0	0	0	0	0	0	0	0	0	0	0	0	0	0	0	0	0	0	0	0	0	0	0	1	3	1	3	0	0	0	0	0
SCRIB	0	0	0	0	0	0	0	1	0	2	0	4	7	3	4	0	0	0	0	0	0	1	0	0	0	0	0	0	0	2	0	0	2	0	0	0	0	0	0	0	0	2	0	0	0	1	0	0	0
SCYL2	0	0	0	0	0	0	0	1	0	1	1	0	0	0	0	0	0	0	0	0	0	0	1	0	0	0	0	0	2	1	0	0	1	0	0	0	0	0	0	0	2	2	0	1	1	0	0	0	0
SEC23A	0	0	0	0	0	0	0	1	0	0	1	0	0	0	0	0	0	1	0	0	0	0	0	0	0	0	0	0	0	0	0	0	0	0	0	0	0	0	0	0	0	0	0	0	0	0	0	0	0
SHMT1	0	0	0	0	0	0	0	2	0	1	0	0	0	0	0	0	1	1	0	0	0	1	0	0	2	1	0	0	0	1	1	1	1	0	0	0	1	0	1	1	1	1	0	2	2	0	0	1	1
SLC12A2	0	0	0	0	0	0	0	1	1	1	0	1	3	2	4	0	0	0	0	0	1	0	0	0	0	0	0	0	0	0	0	0	0	0	0	0	0	0	0	0	0	0	0	0	0	0	0	0	0
SLC1A4	0	0	0	0	0	0	0	1	0	0	0	0	1	0	2	0	0	0	0	0	0	0	0	0	0	0	0	0	0	0	0	0	2	0	0	1	0	0	0	0	0	0	0	0	0	1	1	0	0
SLC20A1	0	0	0	0	0	0	0	1	0	0	0	0	3	2	2	0	0	0	0	1	0	1	0	0	0	0	0	0	0	0	0	0	0	0	0	0	0	0	0	0	0	0	0	0	0	0	0	0	0
SLC29A2	0	0	0	0	0	0	0	1	0	0	0	0	1	2	2	0	0	0	0	1	1	0	0	1	0	0	0	0	0	0	0	0	1	0	1	0	0	1	0	0	0	1	0	0	0	0	0	0	1
SLC4A2	0	0	0	0	0	0	0	1	0	0	0	0	0	1	2	0	0	0	0	0	0	0	0	0	0	0	0	0	0	0	0	0	0	0	0	0	0	0	0	0	0	0	0	0	0	0	0	0	0
SLC4A7	0	0	0	0	0	0	0	1	0	0	0	0	0	1	0	0	0	0	0	0	0	0	0	0	0	0	0	0	0	0	0	0	0	0	0	0	0	0	0	0	0	0	0	0	0	0	0	0	0
SLC6A8	0	0	0	0	0	0	0	2	0	0	0	0	2	1	1	0	0	0	0	1	2	1	0	0	0	0	0	0	0	0	0	0	0	0	0	0	0	0	1	0	0	1	0	0	0	0	0	0	0
SLC7A3	0	0	0	0	0	0	0	1	0	0	0	0	1	0	1	0	1	1	0	1	1	0	1	1	0	0	0	0	0	0	0	0	2	0	1	1	0	0	3	0	0	0	0	0	1	0	0	0	0
SNAP29	0	0	0	0	0	0	0	1	0	0	0	0	2	3	1	0	0	0	0	0	0	0	0	0	0	0	0	0	0	0	0	0	0	0	0	0	0	0	0	0	1	3	0	0	0	0	0	1	0
SNF8	0	0	0	0	0	0	0	1	0	0	0	1	1	1	1	0	1	1	0	0	0	1	0	0	0	0	0	0	1	1	0	0	1	0	0	0	0	0	0	0	2	1	0	0	0	0	0	1	0
SPAST	0	0	0	0	0	0	0	1	0	0	0	0	1	0	0	0	0	0	0	1	0	14	8	15	0	1	5	0	0	0	0	0	0	1	3	1	0	1	1	0	5	4	2	1	0	0	0	2	3
SPG20	0	0	0	0	0	0	0	2	0	0	0	0	0	0	0	0	1	0	1	1	1	0	0	1	0	0	0	0	0	1	0	0	0	0	0	0	0	0	0	0	1	2	0	0	0	0	0	0	0
SRC	0	0	0	0	0	0	0	2	0	0	0	0	1	0	1	0	0	0	0	0	0	0	1	0	0	0	0	0	0	1	0	0	0	0	0	0	0	0	0	0	0	0	1	0	0	0	0	0	0
STK24	0	0	0	0	0	0	0	1	0	0	0	0	0	0	0	0	0	0	0	0	0	0	0	0	0	0	0	0	0	0	0	0	0	0	0	0	0	0	0	0	0	0	0	0	0	0	0	0	0
SURF4	0	0	0	0	0	0	0	2	0	0	1	2	0	0	0	0	0	0	0	0	0	0	0	0	0	0	0	0	0	1	0	0	2	0	0	0	0	0	0	0	0	0	0	0	0	0	0	0	1
SYNCRIP	0	0	0	0	0	0	0	3	0	0	0	0	1	0	0	0	0	0	0	0	0	1	0	3	0	0	0	0	2	0	0	0	1	1	0	0	0	1	1	0	1	1	0	0	0	1	2	2	2
TAOK1	0	0	0	0	0	0	0	1	0	0	0	0	1	0	1	0	0	0	0	0	0	0	0	0	0	0	0	0	0	0	0	0	0	0	0	0	0	0	0	0	5	0	0	0	0	0	0	0	0
TCAF1	0	0	0	0	0	0	0	1	0	0	0	0	0	0	0	0	0	0	0	0	0	0	1	3	0	0	0	0	2	1	0	0	0	0	0	0	0	0	0	1	2	3	1	0	1	0	0	0	0
TGFB1I1	0	0	0	0	0	0	0	1	0	0	0	0	0	1	0	0	0	0	0	0	0	0	0	0	0	0	0	0	0	0	0	0	0	0	0	0	0	0	0	0	0	0	0	0	0	0	0	0	0
TIAL1	0	0	0	0	0	0	0	1	0	1	1	0	0	0	0	0	0	0	0	0	0	1	1	0	0	0	0	0	0	0	0	0	0	0	0	0	0	0	0	0	0	0	0	0	0	0	0	0	0
TMED2	0	0	0	0	0	0	0	1	0	1	0	2	0	0	0	0	0	0	0	0	1	0	0	0	0	0	0	0	0	0	0	0	0	0	0	0	0	0	0	0	1	1	0	0	0	1	1	0	2
TNFRSF10B	0	0	0	0	0	0	0	1	0	0	0	0	1	1	1	0	0	0	0	0	0	0	0	0	0	0	0	0	0	0	0	0	1	0	0	0	0	0	0	0	0	0	0	0	0	0	0	0	0
TNIK	0	0	0	0	0	0	0	1	0	0	0	1	2	4	2	0	0	0	0	1	1	0	0	0	0	0	0	0	0	0	0	0	0	0	0	0	0	0	0	0	0	1	0	0	0	0	0	0	0
TOM1L2	0	0	0	0	0	0	0	1	0	0	0	0	0	0	0	0	0	0	0	0	0	0	0	1	0	0	0	0	0	0	0	0	0	0	0	0	0	0	0	0	1	1	0	0	0	0	0	0	0
TPM3	0	0	0	0	0	0	0	1	0	0	0	0	1	0	0	0	0	0	0	0	0	0	0	0	0	0	0	0	0	0	0	0	0	0	0	0	0	0	0	0	3	0	0	0	0	0	0	0	0
TPT1	0	0	0	0	0	0	0	1	0	0	0	0	0	0	0	0	0	0	0	0	0	0	0	0	0	0	0	0	0	1	0	0	0	0	0	0	0	0	0	0	0	1	0	0	0	0	0	0	0
TRA2B	0	0	0	0	0	0	0	1	0	2	2	2	0	0	0	0	0	0	0	0	0	0	0	0	0	0	0	0	0	0	0	0	0	0	0	0	0	0	0	0	0	0	0	0	0	0	0	0	0
TRAFD1	0	0	0	0	0	0	0	1	0	0	0	0	0	1	1	0	0	0	0	0	0	1	1	1	0	0	0	0	0	0	0	0	0	0	0	0	0	0	0	0	1	1	0	0	0	0	0	1	1
TRIM32	0	0	0	0	0	0	0	1	0	0	0	0	0	4	1	0	0	0	1	0	0	1	2	2	0	0	2	0	0	0	0	0	0	0	0	0	0	0	0	0	1	1	0	0	0	0	0	1	1
TWF2	0	0	0	0	0	0	0	1	0	0	0	0	0	0	0	0	0	0	0	0	0	0	0	0	0	0	0	0	0	0	0	0	0	0	0	0	0	0	0	0	0	0	0	0	0	0	0	0	0
UBE2D3	0	0	0	0	0	0	0	1	0	0	0	0	0	0	0	0	1	1	0	1	0	0	0	0	0	0	0	1	1	2	0	0	1	0	0	0	0	0	0	0	2	0	0	0	0	1	1	1	0
UBE2L3	0	0	0	0	0	0	0	1	0	0	0	0	0	0	0	0	0	0	0	0	0	0	0	0	0	0	0	0	0	0	0	0	1	0	0	0	0	0	0	0	1	1	0	0	0	0	0	2	3
UBE2M	0	0	0	0	0	0	0	1	0	0	0	0	0	0	0	0	0	0	0	0	0	0	0	0	0	0	0	0	1	1	0	0	0	0	0	0	0	0	0	0	0	0	1	0	0	0	0	0	0
UBXN1	0	0	0	0	0	0	0	1	0	0	0	0	0	0	2	0	0	0	0	1	1	1	3	3	0	2	3	0	0	1	0	0	0	1	0	0	0	1	0	0	1	2	1	0	0	0	0	2	2
UNC45A	0	0	0	0	0	0	0	1	0	1	3	1	0	0	0	0	0	0	0	1	1	1	0	0	1	0	0	0	0	0	0	0	0	0	0	0	0	0	0	0	2	2	1	0	0	0	0	0	0
USP9Y	0	0	0	0	0	0	0	1	0	0	0	0	0	0	0	0	0	0	0	1	0	2	0	0	1	0	0	0	0	0	0	0	0	0	0	0	0	0	1	0	2	2	1	1	1	0	0	0	0
VCL	0	0	0	0	0	0	0	2	0	0	0	0	0	1	1	0	0	0	0	0	0	0	0	0	0	2	0	0	0	0	0	0	0	0	0	0	0	1	0	1	13	16	4	3	2	0	0	0	0
VPS25	0	0	0	0	0	0	0	1	0	0	1	2	1	1	1	0	1	1	1	1	1	1	0	1	0	0	1	0	1	1	0	0	1	0	0	1	0	1	0	0	2	6	2	0	0	1	1	3	3
VTI1B	0	0	0	0	0	0	0	1	0	0	0	0	0	0	0	0	0	0	0	0	0	0	0	0	0	0	0	0	0	0	0	0	0	0	0	0	0	0	0	0	0	0	0	0	0	0	0	0	0
WDR61	0	0	0	0	0	0	0	1	2	1	1	0	0	0	0	0	0	0	0	0	0	2	0	0	1	1	0	0	0	1	0	0	0	0	0	0	0	1	0	0	1	1	1	2	1	0	0	0	0
YTHDF2	0	0	0	0	0	0	0	1	0	0	0	0	0	0	0	1	0	0	0	0	0	0	1	1	0	0	0	0	0	3	0	0	1	0	0	0	0	0	0	0	1	1	0	0	0	0	0	0	0
AASDHPPT	0	0	0	0	0	0	0	0	1	1	0	0	0	0	0	0	0	0	0	0	0	1	0	1	0	1	0	0	0	1	0	0	0	0	0	0	0	1	1	0	1	1	1	1	1	0	0	0	3
ABCF2	0	0	0	0	0	0	0	0	1	2	0	1	0	0	0	0	0	0	0	0	0	2	1	1	0	0	0	0	1	0	0	0	0	0	0	0	2	0	1	0	0	0	0	1	0	0	0	0	0
ADSL	0	0	0	0	0	0	0	0	1	1	1	2	0	0	0	1	1	2	0	0	0	1	0	1	0	0	0	0	6	7	5	2	6	0	0	0	0	0	0	0	0	0	0	0	0	0	0	0	0
ALDH1L2	0	0	0	0	0	0	0	0	1	0	0	0	0	0	0	0	0	1	0	0	0	1	0	0	0	0	0	0	0	0	0	0	1	0	0	0	0	0	0	0	0	0	0	0	0	0	0	0	0
APOC2	0	0	0	0	0	0	0	0	1	0	1	0	0	0	0	0	0	0	0	0	0	0	0	0	0	0	0	0	0	0	0	0	0	0	0	0	0	0	0	0	0	0	0	0	0	0	0	0	0
BRIX1	0	0	0	0	0	0	0	0	1	1	0	0	0	0	0	0	0	0	0	0	0	0	1	2	0	0	0	0	0	0	0	0	0	0	0	0	1	0	0	0	0	0	0	0	0	0	0	0	0
CLEC11A	0	0	0	0	0	0	0	0	1	1	0	1	0	0	0	0	0	2	0	0	0	1	0	1	0	0	0	1	2	0	0	0	0	0	0	0	0	0	0	0	0	0	0	0	0	0	0	0	0
CORO7	0	0	0	0	0	0	0	0	1	1	1	0	0	0	0	0	0	0	0	0	0	0	1	0	0	0	0	0	0	1	0	0	0	0	0	0	0	0	0	0	0	0	0	0	0	0	0	0	0
CUL5	0	0	0	0	0	0	0	0	1	1	0	0	0	0	0	0	0	0	0	0	0	0	0	0	0	0	0	0	0	0	0	0	0	0	0	0	0	0	0	0	1	1	0	0	1	0	0	0	0
DDX39A	0	0	0	0	0	0	0	0	1	4	1	0	0	0	0	1	0	0	0	0	0	0	2	3	0	0	0	2	1	0	0	0	0	0	0	0	0	0	0	0	0	0	0	0	0	1	0	0	0
DIS3	0	0	0	0	0	0	0	0	3	2	3	1	0	0	0	5	0	1	0	0	0	5	2	3	1	0	0	2	1	3	0	0	0	0	0	0	1	0	2	0	0	1	2	2	2	0	0	0	0
DYNLL1	0	0	0	0	0	0	0	0	1	0	0	0	0	0	0	0	0	0	0	0	0	0	0	0	0	0	0	0	0	0	0	0	0	0	0	0	0	0	0	0	0	0	0	0	0	0	0	0	0
EFTUD2	0	0	0	0	0	0	0	0	2	8	4	0	0	0	0	2	3	4	0	0	0	2	1	4	0	0	0	0	1	6	0	0	1	0	0	0	1	0	0	0	1	3	0	1	1	0	0	0	0
EIF5	0	0	0	0	0	0	0	0	2	0	2	0	0	0	0	0	0	0	0	0	0	0	0	0	0	0	0	0	0	0	0	0	0	0	0	0	0	0	0	0	0	0	0	0	0	0	0	0	0
EMG1	0	0	0	0	0	0	0	0	1	1	0	0	0	0	0	0	0	0	0	0	0	0	0	0	0	0	0	0	0	1	0	0	0	0	0	0	0	0	0	0	0	0	0	0	0	0	0	0	0
EXOSC2	0	0	0	0	0	0	0	0	1	0	0	0	0	0	0	0	0	0	0	0	0	0	0	0	0	0	0	0	0	0	0	0	0	0	0	0	0	0	0	0	0	0	0	0	0	0	0	0	0
FAM213B	0	0	0	0	0	0	0	0	1	0	0	0	0	0	0	0	0	1	0	0	0	0	0	0	0	0	0	0	0	0	0	0	0	0	0	0	0	0	0	0	0	0	0	0	0	0	0	0	0
GFPT1	0	0	0	0	0	0	0	0	2	2	2	1	0	0	0	1	1	4	0	0	1	0	1	0	3	0	0	1	2	2	0	0	1	0	0	0	0	0	1	0	0	1	0	4	2	0	0	0	0
GMPPA	0	0	0	0	0	0	0	0	1	0	2	0	0	0	0	0	0	0	0	0	0	1	1	1	0	0	0	0	0	1	0	0	0	0	0	0	0	1	0	0	0	0	1	0	0	0	0	0	0
GPS1	0	0	0	0	0	0	0	0	1	0	0	0	0	0	0	0	0	0	0	0	0	0	0	0	0	0	0	0	0	0	0	0	0	0	0	0	0	0	0	0	0	0	0	0	0	0	0	0	0
GSTZ1	0	0	0	0	0	0	0	0	1	0	0	0	0	0	0	0	0	0	0	0	0	0	1	0	0	0	0	0	0	0	0	0	0	0	0	0	0	0	1	0	0	0	0	0	0	0	0	0	0
HBS1L	0	0	0	0	0	0	0	0	1	1	1	0	0	0	0	0	0	0	0	0	0	1	0	0	0	0	0	0	0	0	0	0	0	0	0	0	0	0	0	0	0	0	0	0	0	0	0	0	0
HIST2H2AC	0	0	0	0	0	0	0	0	1	0	0	0	0	0	0	0	0	0	0	0	0	0	0	0	0	0	0	0	0	0	0	0	0	0	0	0	0	0	0	0	0	0	0	0	2	0	0	0	0
HS3ST6	0	0	0	0	0	0	0	0	1	1	0	0	0	0	0	0	0	0	0	0	0	0	0	0	0	0	0	0	1	1	0	0	0	0	0	0	0	0	0	0	0	0	0	1	0	0	0	0	0
HTRA1	0	0	0	0	0	0	0	0	1	0	0	0	0	0	0	0	0	1	1	0	0	0	0	0	1	1	0	0	0	0	0	0	1	0	0	0	0	0	1	1	0	0	0	1	0	0	0	0	0
IKBKAP	0	0	0	0	0	0	0	0	1	4	5	2	0	0	0	2	0	1	0	0	0	2	2	0	0	0	0	0	0	2	0	0	0	0	0	0	1	0	2	2	2	0	0	2	0	0	0	0	0
ISYNA1	0	0	0	0	0	0	0	0	1	0	1	0	0	0	0	0	0	0	0	0	0	0	0	0	0	0	0	0	1	0	0	0	1	0	0	0	0	2	1	0	0	0	0	1	1	0	0	0	0
KDELR2	0	0	0	0	0	0	0	0	1	1	0	0	0	0	0	0	0	0	0	0	0	0	0	0	0	0	0	0	0	0	0	0	0	0	0	0	0	0	0	0	0	0	0	0	0	0	0	0	0
KIF11	0	0	0	0	0	0	0	0	1	2	0	0	0	0	0	0	0	0	0	0	0	1	0	1	0	0	0	0	1	0	0	0	0	0	0	0	0	0	0	0	1	1	0	0	0	0	0	0	0
MAN1A1	0	0	0	0	0	0	0	0	1	0	0	0	0	0	0	1	0	1	0	0	0	0	2	0	0	0	0	0	0	0	0	0	0	0	0	0	0	0	1	0	1	1	0	4	2	0	0	0	0
MRI1	0	0	0	0	0	0	0	0	1	0	1	0	0	0	0	0	0	0	0	0	0	1	0	0	0	0	0	0	0	0	0	0	0	0	0	0	0	0	0	0	0	0	0	0	0	0	0	0	0
MYBBP1A	0	0	0	0	0	0	0	0	1	0	2	0	0	0	0	0	0	0	0	0	0	0	1	0	0	0	0	0	0	0	0	0	0	0	0	0	0	0	0	0	1	0	0	2	1	0	0	0	0
MYO1B	0	0	0	0	0	0	0	0	1	1	1	0	0	0	1	0	0	0	0	0	0	0	0	0	0	0	0	0	1	0	0	0	0	0	0	0	0	0	0	0	0	0	0	0	0	0	0	0	0
NCAPG	0	0	0	0	0	0	0	0	1	1	1	0	0	0	0	0	1	0	0	0	0	1	0	1	0	0	0	0	0	0	0	0	0	0	0	0	0	0	0	0	0	0	0	0	0	0	0	0	0
NOP56	0	0	0	0	0	0	0	0	1	1	1	1	0	0	0	1	0	0	0	0	0	2	1	4	0	0	0	0	0	1	0	0	0	0	0	0	1	0	0	0	1	1	1	3	1	0	0	0	0
NSUN2	0	0	0	0	0	0	0	0	2	3	5	0	1	1	0	0	0	1	0	0	0	5	1	6	1	0	0	0	2	3	0	0	0	0	0	0	3	0	1	1	0	1	2	4	2	0	0	0	0
OTUB1	0	0	0	0	0	0	0	0	1	1	1	0	0	0	0	0	1	3	0	0	0	1	1	0	0	0	0	0	0	0	0	0	0	0	0	0	0	0	1	0	1	0	1	2	2	0	0	0	0
PDXK	0	0	0	0	0	0	0	0	1	0	0	0	0	0	0	0	0	0	0	0	0	1	0	0	0	0	0	1	0	0	0	0	0	0	0	0	0	0	0	0	0	1	1	0	0	0	0	0	0
PEG10	0	0	0	0	0	0	0	0	1	1	0	0	0	0	0	0	0	1	0	0	0	0	0	0	0	0	0	0	0	0	0	0	0	0	0	0	0	0	0	0	0	0	0	0	0	0	0	0	0
POLR2C	0	0	0	0	0	0	0	0	1	0	0	0	0	0	0	0	0	0	0	0	0	0	0	0	0	0	0	0	0	1	0	0	0	0	0	0	0	0	0	1	0	0	0	1	0	0	0	0	0
POLR2H	0	0	0	0	0	0	0	0	1	1	0	0	0	0	0	0	0	0	0	0	0	0	0	0	1	0	0	0	0	0	0	0	0	0	0	0	0	1	0	0	0	0	0	0	0	0	0	0	0
PPIE	0	0	0	0	0	0	0	0	1	0	1	0	0	0	0	0	0	0	0	0	0	0	0	0	0	0	0	0	0	0	0	0	0	0	0	0	0	0	0	0	0	0	0	0	0	1	0	0	0
PSMD4	0	0	0	0	0	0	0	0	1	1	3	2	1	0	9	0	0	0	0	0	0	3	2	4	0	2	1	0	1	2	0	0	3	0	0	0	1	0	0	0	3	2	2	2	2	3	5	5	3
PTBP3	0	0	0	0	0	0	0	0	1	0	1	0	0	0	0	0	1	0	0	0	0	1	1	1	0	0	0	0	1	1	0	0	0	0	0	0	0	0	0	0	0	0	0	0	0	0	0	0	1
PTP4A1	0	0	0	0	0	0	0	0	1	2	0	0	0	0	0	0	0	0	0	0	1	3	0	0	0	0	0	0	0	0	0	0	0	0	0	0	0	0	0	0	2	1	1	1	0	0	0	0	3
PTP4A2	0	0	0	0	0	0	0	0	1	0	0	0	0	0	1	0	0	0	0	1	0	0	1	0	0	0	0	0	0	0	0	0	0	0	0	0	0	0	0	1	2	3	1	0	0	0	1	3	0
PXDN	0	0	0	0	0	0	0	0	1	1	1	0	0	0	0	1	0	1	0	0	0	1	0	1	0	0	0	0	0	0	0	0	0	0	0	0	0	0	2	0	0	0	0	1	0	0	0	0	0
RALB	0	0	0	0	0	0	0	0	1	1	0	1	5	1	2	1	1	0	1	0	0	1	0	1	0	0	0	0	0	1	2	0	0	0	1	0	1	0	1	0	1	1	0	0	0	0	0	1	1
RECQL	0	0	0	0	0	0	0	0	1	0	0	0	0	0	0	0	0	0	0	0	0	1	0	0	0	0	0	0	0	0	0	0	0	0	0	0	1	0	1	0	0	0	0	1	0	0	0	0	0
RPF2	0	0	0	0	0	0	0	0	1	0	0	0	0	0	0	0	0	0	0	0	0	0	0	0	0	0	0	0	0	0	0	0	0	0	0	0	0	0	0	0	0	0	0	0	0	0	0	0	0
SF3A2	0	0	0	0	0	0	0	0	1	1	1	0	0	0	0	0	0	0	0	0	0	1	1	1	0	0	0	0	0	0	0	0	0	0	0	0	0	0	0	0	0	0	0	0	0	0	0	0	0
SF3B3	0	0	0	0	0	0	0	0	1	3	1	0	1	0	0	0	1	2	0	0	0	4	0	2	0	0	0	1	0	1	0	0	0	0	0	0	0	0	1	0	1	1	0	2	2	0	0	0	0
SLC16A10	0	0	0	0	0	0	0	0	1	1	1	0	0	1	0	0	0	1	1	0	0	0	0	0	0	0	0	0	0	1	0	0	0	0	1	0	0	0	0	0	2	0	0	0	0	0	0	0	0
SNRPB2	0	0	0	0	0	0	0	0	1	2	1	1	0	0	0	0	0	1	0	0	0	1	0	1	0	0	0	0	1	1	0	0	0	0	0	0	0	0	0	0	0	0	0	0	0	0	0	0	0
SNX2	0	0	0	0	0	0	0	0	1	0	0	0	0	0	0	0	0	2	0	0	0	0	0	0	0	0	0	0	0	0	0	0	0	0	0	0	0	0	0	0	0	0	0	0	0	0	0	0	0
STK25	0	0	0	0	0	0	0	0	1	1	1	0	0	0	1	0	0	0	0	0	0	0	0	0	0	0	0	0	0	0	0	0	2	0	0	0	0	0	1	0	1	0	1	0	1	0	0	0	1
STMN1	0	0	0	0	0	0	0	0	1	1	1	1	1	1	1	0	0	0	0	0	0	0	0	0	0	0	0	0	0	0	0	0	0	0	0	0	0	0	0	0	0	1	1	0	0	0	0	0	0
SULT1C4	0	0	0	0	0	0	0	0	1	1	0	0	0	0	0	0	1	0	0	0	0	0	0	0	0	0	0	0	0	0	0	0	1	0	0	0	0	0	0	0	0	0	0	0	0	0	0	0	0
TM9SF3	0	0	0	0	0	0	0	0	1	0	1	0	0	0	0	0	0	0	0	0	0	0	0	0	0	0	0	0	0	0	0	0	0	0	0	0	0	0	0	0	0	0	0	0	1	1	0	1	0
TOR1B	0	0	0	0	0	0	0	0	1	0	1	0	0	0	0	0	1	0	0	0	0	0	0	1	0	0	0	0	0	0	0	1	0	0	0	0	0	0	0	0	1	1	2	1	0	0	0	0	0
TP73	0	0	0	0	0	0	0	0	12	0	0	0	0	0	0	0	0	0	0	0	0	0	0	0	0	0	0	0	0	0	0	0	0	0	0	0	0	0	0	0	0	0	0	0	0	0	0	0	0
UMPS	0	0	0	0	0	0	0	0	2	1	2	0	0	0	0	0	0	0	0	0	0	1	0	2	0	0	0	1	1	2	0	0	0	0	0	0	0	0	0	0	0	0	1	0	0	0	0	0	0
VBP1	0	0	0	0	0	0	0	0	1	0	0	0	0	0	0	0	0	0	0	0	0	0	0	1	0	0	0	0	0	0	0	0	0	0	0	0	0	0	0	0	3	4	1	2	2	0	0	0	0
VNN1	0	0	0	0	0	0	0	0	1	0	0	0	0	0	0	0	0	0	0	0	0	1	0	0	0	1	0	0	0	0	0	0	0	0	0	0	0	0	0	0	0	0	0	0	0	0	0	0	0
VPS29	0	0	0	0	0	0	0	0	1	0	0	0	0	0	0	0	0	0	0	0	0	0	0	0	0	0	0	0	0	0	0	0	0	0	0	0	0	0	0	0	0	0	0	1	0	0	0	0	0
WBP2	0	0	0	0	0	0	0	0	1	1	0	1	0	0	0	0	0	0	0	0	0	0	0	0	0	0	0	0	0	0	0	0	0	0	0	0	0	0	0	0	0	0	0	0	0	0	0	1	1
XYLB	0	0	0	0	0	0	0	0	1	1	0	0	0	0	0	0	1	0	0	0	0	0	0	0	0	0	0	0	1	0	0	1	0	0	0	0	0	0	1	0	1	0	0	0	1	0	0	0	0
YARS	0	0	0	0	0	0	0	0	5	7	5	3	1	0	1	1	0	2	0	0	0	4	2	4	0	0	0	0	2	3	0	0	0	0	0	0	0	0	0	0	1	0	0	0	0	0	0	0	0
AGL	0	0	0	0	0	0	0	0	0	1	0	0	0	0	0	1	0	0	0	0	0	0	0	0	0	0	0	0	0	0	0	0	0	0	0	0	0	1	0	0	0	0	0	0	0	0	0	0	0
AGO2	0	0	0	0	0	0	0	0	0	2	1	0	0	0	0	0	0	0	0	0	0	0	0	0	0	0	0	0	0	1	0	0	0	0	0	0	0	0	0	0	0	0	0	0	0	0	0	0	0
AIMP1	0	0	0	0	0	0	0	0	0	1	2	0	0	0	0	0	0	0	0	0	0	0	0	1	0	0	0	0	0	1	0	0	0	0	0	0	0	0	0	0	0	0	0	0	0	0	0	0	0
ARL15	0	0	0	0	0	0	0	0	0	1	0	0	0	0	0	0	1	0	0	0	0	1	1	1	0	0	0	0	0	0	0	0	0	0	0	0	0	1	1	0	0	0	0	0	0	0	0	0	0
ARL6IP5	0	0	0	0	0	0	0	0	0	1	0	0	0	0	0	0	0	0	0	0	0	0	0	0	0	0	0	0	0	0	0	0	0	0	0	0	0	0	0	0	0	0	0	0	0	0	0	0	0
ARL8A	0	0	0	0	0	0	0	0	0	1	0	0	0	0	0	0	0	0	0	0	0	0	0	0	0	0	0	0	0	0	0	0	0	0	0	0	0	0	0	0	0	0	0	0	0	0	0	0	0
BOP1	0	0	0	0	0	0	0	0	0	1	0	0	0	0	0	0	0	0	0	0	0	0	0	0	0	0	0	0	0	0	0	0	0	0	0	0	0	0	0	0	0	0	0	0	0	0	0	0	0
BYSL	0	0	0	0	0	0	0	0	0	2	2	0	0	0	0	0	0	0	0	0	0	2	1	1	0	0	0	0	1	2	0	0	0	0	0	0	1	0	0	0	0	0	0	0	0	0	0	0	0
CAPZB	0	0	0	0	0	0	0	0	0	2	0	1	0	0	0	0	2	1	0	0	0	0	0	0	0	0	0	0	0	0	0	0	0	0	0	0	0	0	0	0	0	0	0	0	0	0	0	0	0
CARM1	0	0	0	0	0	0	0	0	0	1	1	0	0	0	0	0	0	1	0	0	0	0	1	1	0	0	0	0	1	0	0	0	0	0	0	0	0	0	0	0	0	1	0	0	0	0	0	0	0
CBX5	0	0	0	0	0	0	0	0	0	1	0	0	0	0	0	0	0	0	0	0	0	0	0	0	0	0	0	0	0	0	0	0	0	0	0	0	0	0	0	0	0	0	0	0	0	0	0	0	0
CD97	0	0	0	0	0	0	0	0	0	1	0	0	0	0	0	0	0	0	0	0	0	0	0	0	0	0	0	0	0	0	0	0	0	0	0	0	0	0	1	0	0	0	0	0	0	0	0	0	0
CDK5	0	0	0	0	0	0	0	0	0	1	0	0	0	0	0	0	0	1	0	0	0	0	0	0	0	0	0	0	0	2	0	0	0	0	0	0	1	0	0	0	0	0	0	0	1	0	0	0	0
CHD4	0	0	0	0	0	0	0	0	0	1	0	0	0	0	0	0	0	0	0	0	0	0	0	1	0	0	0	0	0	0	0	0	0	0	0	0	0	0	0	0	0	0	0	0	0	0	0	0	0
CLUH	0	0	0	0	0	0	0	0	0	1	0	0	0	0	0	0	0	0	0	0	0	2	0	0	1	0	0	0	0	0	0	0	0	0	0	0	0	0	1	0	1	0	0	2	0	0	0	0	0
COMT	0	0	0	0	0	0	0	0	0	1	0	0	0	0	0	0	0	1	0	1	1	0	0	0	1	0	1	0	0	0	0	0	0	0	0	0	0	0	0	0	0	0	1	1	1	0	0	0	0
COPG1	0	0	0	0	0	0	0	0	0	2	3	0	0	0	0	0	0	0	0	0	0	0	2	3	0	0	0	0	1	3	0	0	0	0	0	0	0	0	0	0	2	3	0	4	0	0	0	0	0
CPA1	0	0	0	0	0	0	0	0	0	1	1	0	0	0	0	0	1	1	1	0	0	0	0	0	0	1	0	0	0	0	0	0	0	0	0	0	0	0	0	0	0	0	0	0	0	0	0	0	0
CPSF1	0	0	0	0	0	0	0	0	0	1	0	0	0	0	0	0	0	0	0	0	0	2	0	0	0	0	0	0	0	0	0	0	0	0	0	0	1	0	0	0	0	0	0	0	0	0	0	0	0
CPSF2	0	0	0	0	0	0	0	0	0	1	1	0	0	0	0	0	0	0	0	0	0	1	0	0	0	0	0	0	0	0	0	0	0	0	0	0	0	0	0	0	0	0	0	0	0	0	0	0	0
CTBP2	0	0	0	0	0	0	0	0	0	2	1	0	0	0	0	0	0	0	0	0	0	0	0	0	0	0	0	0	0	1	0	0	0	0	0	0	0	0	0	0	0	0	0	0	0	0	0	0	0
CYFIP2	0	0	0	0	0	0	0	0	0	1	0	0	0	0	0	0	0	0	0	0	0	0	0	0	0	0	0	0	0	0	0	0	0	0	0	0	0	0	0	0	3	0	0	0	0	0	0	0	0
DCAF7	0	0	0	0	0	0	0	0	0	1	1	0	0	0	0	0	0	0	0	0	0	1	0	0	0	0	0	0	0	0	0	0	0	0	0	0	0	0	0	0	0	0	0	1	0	2	2	2	1
DOCK7	0	0	0	0	0	0	0	0	0	1	0	0	0	0	0	0	0	0	0	0	0	0	0	0	0	0	0	0	0	0	0	0	0	0	0	0	0	0	0	0	0	0	0	0	0	0	0	0	0
DPY30	0	0	0	0	0	0	0	0	0	1	1	0	0	0	0	0	0	0	0	0	0	0	0	0	0	0	0	0	0	0	0	0	0	0	0	0	0	0	0	0	0	0	0	0	0	0	0	0	0
DUSP9	0	0	0	0	0	0	0	0	0	1	1	0	0	0	0	0	0	0	0	0	0	0	0	0	0	0	0	0	0	0	0	0	1	0	0	0	0	0	0	0	1	1	0	0	0	1	0	0	0
ECM29	0	0	0	0	0	0	0	0	0	1	0	0	0	0	0	0	0	0	0	0	0	0	0	0	0	0	0	0	1	0	0	0	0	0	0	0	0	0	0	0	3	2	1	2	1	0	0	0	0
EIF1AY	0	0	0	0	0	0	0	0	0	1	0	0	0	0	0	0	0	0	0	0	0	0	0	0	0	0	0	0	0	0	0	0	0	0	0	0	0	0	0	0	0	0	0	0	0	0	0	0	0
EIF2AK2	0	0	0	0	0	0	0	0	0	1	1	0	0	0	0	0	0	0	0	0	0	0	0	1	0	0	0	0	0	1	0	0	0	0	0	0	0	0	0	0	0	0	1	0	1	0	0	0	0
EIF2S2	0	0	0	0	0	0	0	0	0	1	1	0	0	0	0	0	0	0	0	0	0	0	1	0	0	0	0	0	0	1	0	0	0	0	0	0	0	0	0	0	0	0	0	0	0	0	0	0	0
EIF3M	0	0	0	0	0	0	0	0	0	1	0	0	0	0	0	1	0	0	0	0	0	0	0	0	0	0	0	0	0	0	0	0	0	0	0	0	0	0	0	0	0	0	0	0	0	0	0	0	0
FAM98B	0	0	0	0	0	0	0	0	0	1	1	0	0	0	0	0	0	0	0	0	0	0	0	0	0	0	0	0	0	1	0	0	0	0	0	0	0	0	0	0	0	0	0	0	0	0	0	0	0
FRYL	0	0	0	0	0	0	0	0	0	1	1	0	0	0	0	0	0	0	0	0	0	0	0	0	0	0	0	0	0	0	0	0	0	0	0	0	0	0	0	0	0	0	0	0	0	0	0	0	0
FXR1	0	0	0	0	0	0	0	0	0	1	1	0	0	0	0	0	0	0	0	0	0	0	1	0	0	0	0	0	0	0	0	0	0	0	0	0	0	0	0	0	0	0	0	1	0	0	0	0	0
GEMIN4	0	0	0	0	0	0	0	0	0	1	1	0	0	0	0	0	1	0	0	0	0	0	0	0	0	0	0	0	0	0	0	0	0	1	0	0	0	0	0	0	0	0	0	0	0	0	0	0	0
GNA11	0	0	0	0	0	0	0	0	0	2	0	0	3	5	1	0	1	0	0	0	2	0	0	0	0	0	0	0	0	0	0	0	0	0	0	0	0	0	0	0	0	0	0	0	0	0	0	0	0
GPR107	0	0	0	0	0	0	0	0	0	1	0	0	0	0	0	0	0	0	0	0	0	0	0	0	0	0	0	0	0	0	0	0	0	0	0	0	0	0	0	0	0	0	0	0	0	0	0	0	0
GTF3C4	0	0	0	0	0	0	0	0	0	1	0	0	0	0	0	0	0	0	0	0	0	0	0	0	0	0	0	0	0	0	0	0	0	0	0	0	0	0	0	0	0	0	0	0	0	0	0	0	0
HDAC2	0	0	0	0	0	0	0	0	0	1	0	0	0	0	0	0	0	0	0	0	0	1	0	4	0	0	0	0	0	0	0	0	0	0	0	0	0	1	0	0	0	0	1	0	1	0	0	0	0
HNRNPUL2	0	0	0	0	0	0	0	0	0	1	1	0	0	0	0	0	0	1	0	0	0	0	0	0	0	0	0	0	0	0	0	0	0	0	0	0	0	0	0	0	0	0	0	0	0	0	0	0	0
HSPA4L	0	0	0	0	0	0	0	0	0	4	1	0	0	0	0	0	0	0	0	0	0	2	0	1	0	0	0	0	0	2	0	0	0	0	0	0	0	0	0	0	3	0	0	1	0	0	0	0	0
INA	0	0	0	0	0	0	0	0	0	3	1	0	0	0	0	0	0	0	0	0	0	0	0	0	0	0	0	0	0	0	0	0	0	0	0	0	0	0	0	0	0	0	0	0	0	0	0	0	0
INHBE	0	0	0	0	0	0	0	0	0	2	0	1	0	0	0	0	1	2	0	0	0	0	0	4	0	0	0	0	0	0	0	0	0	0	0	0	0	0	0	0	1	0	0	0	0	0	0	1	0
IQGAP2	0	0	0	0	0	0	0	0	0	1	1	1	0	0	0	0	0	1	0	0	0	1	1	0	0	0	0	0	0	1	0	0	0	0	0	0	0	0	0	0	0	0	0	0	0	0	0	0	0
KIAA1524	0	0	0	0	0	0	0	0	0	1	0	0	0	0	0	1	0	0	0	0	0	0	0	0	0	0	0	0	0	0	0	0	0	0	0	0	0	0	0	0	0	1	0	0	0	0	0	0	0
KIF1C	0	0	0	0	0	0	0	0	0	1	0	0	0	0	0	0	0	0	0	0	0	1	0	0	0	0	0	0	0	0	0	0	0	0	0	0	0	0	0	0	0	0	0	0	0	0	0	0	0
MCFD2	0	0	0	0	0	0	0	0	0	1	0	0	0	0	0	0	0	0	0	0	0	0	0	0	0	0	0	0	0	0	0	0	0	0	0	0	0	0	0	0	0	0	0	0	0	0	0	0	0
MTOR	0	0	0	0	0	0	0	0	0	2	1	0	0	0	0	1	0	0	0	0	0	2	1	1	0	0	0	0	1	1	0	0	0	0	0	0	0	0	0	0	0	0	1	0	1	0	0	0	0
NAA10	0	0	0	0	0	0	0	0	0	2	0	0	0	0	0	0	0	0	0	0	0	1	0	0	0	0	0	0	0	1	0	0	0	0	0	0	0	0	0	0	1	1	0	0	0	0	0	0	0
NCAPH	0	0	0	0	0	0	0	0	0	1	0	0	0	0	0	0	0	0	0	0	0	0	0	1	0	0	0	0	1	0	0	0	0	0	0	0	0	0	0	0	0	0	0	0	0	0	0	0	0
NEK9	0	0	0	0	0	0	0	0	0	1	0	0	0	0	0	0	0	0	0	0	0	0	0	0	0	0	0	0	1	2	0	0	0	0	0	0	0	0	0	0	0	0	0	0	1	0	0	0	0
NID1	0	0	0	0	0	0	0	0	0	1	0	0	5	0	0	0	0	1	0	0	0	1	0	1	0	0	0	0	1	0	0	0	0	0	0	0	0	0	2	0	1	1	0	2	3	0	0	1	0
P4HA1	0	0	0	0	0	0	0	0	0	1	0	0	0	0	0	0	0	0	0	0	0	0	0	0	0	0	0	0	0	0	0	0	0	0	0	0	0	0	1	0	0	0	0	1	1	0	0	0	0
P4HB	0	0	0	0	0	0	0	0	0	1	0	0	0	0	0	0	0	0	0	0	0	0	0	1	0	0	0	0	0	0	0	0	0	0	0	0	0	0	1	0	3	0	0	0	0	1	0	0	0
PACSIN1	0	0	0	0	0	0	0	0	0	1	0	0	0	0	0	0	0	0	0	0	0	0	0	0	0	0	0	0	0	0	0	0	0	0	0	0	0	0	0	0	0	0	0	0	0	0	0	0	0
PAF1	0	0	0	0	0	0	0	0	0	1	0	0	0	0	0	0	0	0	0	0	0	0	0	0	0	0	0	0	0	0	0	0	0	0	0	0	0	0	0	0	0	0	0	0	0	0	0	0	0
PAFAH1B2	0	0	0	0	0	0	0	0	0	1	1	1	0	0	0	0	0	1	0	0	0	1	1	0	0	0	0	0	1	0	0	0	0	0	0	0	0	0	0	0	0	0	0	0	1	0	0	0	0
PDCD10	0	0	0	0	0	0	0	0	0	1	0	0	1	1	0	0	0	0	0	0	0	0	0	0	0	0	0	0	0	0	0	0	0	0	0	0	0	0	0	0	0	0	0	0	0	0	0	0	0
PHKA1	0	0	0	0	0	0	0	0	0	1	0	0	0	0	0	0	0	0	0	0	0	0	0	0	0	0	0	0	0	0	0	0	0	0	0	0	0	0	0	0	0	0	0	0	0	0	0	0	0
POLD3	0	0	0	0	0	0	0	0	0	1	0	0	0	0	0	0	0	0	0	0	0	0	0	0	0	0	0	0	0	0	0	0	0	0	0	0	0	0	0	0	0	0	0	0	0	0	0	0	0
PPP2CA	0	0	0	0	0	0	0	0	0	5	0	0	0	0	0	0	0	0	0	0	0	0	0	0	0	0	0	0	0	0	0	0	0	0	0	0	0	0	0	0	0	0	0	0	0	0	0	0	0
PRKAG1	0	0	0	0	0	0	0	0	0	1	1	0	0	0	0	0	0	0	0	0	0	1	0	0	0	0	0	0	0	0	0	0	0	0	0	0	0	0	0	0	0	0	0	0	0	0	0	0	0
RAD50	0	0	0	0	0	0	0	0	0	1	1	0	0	0	0	0	0	0	0	0	0	0	0	1	0	0	0	0	0	0	0	0	0	0	0	0	0	0	0	0	0	0	0	0	0	0	0	0	0
RANBP6	0	0	0	0	0	0	0	0	0	1	0	0	0	0	0	0	0	0	0	0	0	0	0	0	0	0	0	0	0	0	0	0	0	0	0	0	0	0	0	0	0	0	0	0	0	0	0	0	0
RBM39	0	0	0	0	0	0	0	0	0	1	0	0	0	2	0	0	0	0	0	0	0	0	0	0	0	0	0	0	0	0	0	0	0	0	0	0	0	0	0	0	0	0	0	0	0	0	0	0	0
RFC2	0	0	0	0	0	0	0	0	0	1	0	1	0	0	0	0	0	0	0	0	0	0	0	0	0	0	0	0	0	1	0	0	0	0	0	0	1	0	1	0	1	1	0	1	1	0	0	0	0
RIOK1	0	0	0	0	0	0	0	0	0	1	1	0	0	0	0	0	0	0	0	0	0	0	0	0	0	0	0	0	0	2	0	0	0	0	0	0	0	0	0	0	0	0	0	0	0	0	0	0	0
RP2	0	0	0	0	0	0	0	0	0	1	0	0	3	3	1	0	1	1	1	1	0	1	0	0	0	1	1	0	0	1	0	0	0	1	0	0	0	1	0	0	0	0	0	0	0	0	0	1	1
SAP18	0	0	0	0	0	0	0	0	0	2	1	0	0	1	0	0	0	0	0	0	0	0	0	0	0	0	0	0	0	0	0	0	0	0	0	0	0	0	0	0	0	0	0	0	0	0	0	0	0
SEC22B	0	0	0	0	0	0	0	0	0	1	0	0	0	0	1	0	0	0	0	0	0	0	0	0	0	0	0	0	0	1	0	0	1	0	0	0	0	0	0	0	0	0	0	0	0	0	0	0	1
SEPT8	0	0	0	0	0	0	0	0	0	1	0	0	0	0	0	0	0	0	0	0	0	0	0	0	0	0	0	0	0	0	0	0	0	0	0	0	0	0	0	0	0	0	0	0	0	0	0	0	0
SF3B2	0	0	0	0	0	0	0	0	0	1	1	0	0	0	0	0	0	0	0	0	0	0	0	0	0	0	0	0	0	0	0	0	0	0	0	0	0	0	0	0	0	0	0	0	0	0	0	0	0
SLC38A1	0	0	0	0	0	0	0	0	0	1	0	2	0	0	0	0	1	0	1	1	2	0	0	1	0	0	0	0	0	0	0	0	1	2	1	0	0	0	2	0	0	0	0	0	0	0	0	0	1
SLC39A6	0	0	0	0	0	0	0	0	0	1	1	1	1	2	0	0	1	1	0	2	1	1	1	1	0	0	0	0	0	0	0	0	1	0	0	0	0	0	1	0	1	0	0	0	0	0	0	0	0
SLC6A15	0	0	0	0	0	0	0	0	0	1	1	2	3	1	1	0	0	0	0	0	0	0	1	0	0	0	0	0	0	0	0	0	0	0	0	0	0	0	0	0	1	0	0	0	0	0	0	0	0
SLC9A3R2	0	0	0	0	0	0	0	0	0	1	0	0	1	2	1	0	0	0	0	0	0	0	0	0	0	0	0	0	0	0	0	0	0	0	0	0	0	0	0	0	0	0	0	0	0	0	0	0	0
SLIT2	0	0	0	0	0	0	0	0	0	1	0	0	1	0	1	0	1	0	0	1	0	0	1	1	0	0	0	0	0	0	0	0	0	1	1	0	0	0	0	0	0	0	0	0	0	0	0	0	0
SMARCC1	0	0	0	0	0	0	0	0	0	2	0	0	0	0	0	0	0	0	0	0	0	0	0	0	0	0	0	0	0	0	0	0	0	0	0	0	0	0	0	0	0	1	1	0	0	0	0	0	0
SMC2	0	0	0	0	0	0	0	0	0	1	1	0	0	0	0	2	1	0	0	0	0	0	0	1	0	0	0	0	1	1	0	0	0	0	0	0	0	0	0	0	0	0	0	1	0	0	0	0	0
SMC3	0	0	0	0	0	0	0	0	0	3	1	0	0	0	0	0	0	0	0	0	0	1	1	1	0	0	0	0	1	1	0	0	0	0	0	0	0	0	0	1	2	1	0	3	0	0	0	0	0
SNRPA1	0	0	0	0	0	0	0	0	0	2	1	0	0	0	0	0	0	1	0	0	0	1	0	1	0	0	0	2	1	3	0	0	0	0	0	0	0	0	0	0	0	0	0	1	0	0	0	0	0
SPATA5L1	0	0	0	0	0	0	0	0	0	1	1	0	0	0	0	0	0	0	0	0	0	0	0	0	0	0	0	0	0	0	0	0	0	0	0	0	0	0	0	0	0	0	0	1	0	0	0	0	0
SRSF10	0	0	0	0	0	0	0	0	0	1	0	0	0	0	0	0	0	0	0	0	0	0	0	0	0	0	0	0	0	0	0	0	0	0	0	0	0	0	0	0	0	0	0	0	0	0	0	0	0
STAT3	0	0	0	0	0	0	0	0	0	1	0	0	0	0	0	0	0	0	0	0	0	0	0	0	0	0	0	0	0	0	0	0	0	0	0	0	0	0	0	0	3	0	0	1	0	0	0	0	0
STXBP2	0	0	0	0	0	0	0	0	0	1	0	0	0	1	1	0	0	0	0	0	0	0	0	0	0	0	0	0	0	0	0	0	0	0	0	0	0	0	0	0	0	0	0	0	0	0	0	0	0
SUPT5H	0	0	0	0	0	0	0	0	0	1	0	0	0	0	0	0	0	0	0	0	0	0	0	0	0	0	0	0	0	0	0	0	0	0	0	0	0	0	0	0	0	0	0	0	0	0	0	0	0
TBC1D10B	0	0	0	0	0	0	0	0	0	1	0	0	1	0	2	0	0	1	0	0	0	0	0	0	0	0	0	0	0	0	0	0	0	0	0	0	0	0	0	0	0	0	0	0	0	0	0	0	0
TBCE	0	0	0	0	0	0	0	0	0	1	1	0	0	0	0	0	0	0	0	0	0	1	0	0	0	0	0	0	0	0	0	0	0	0	0	0	0	0	0	0	0	0	0	0	0	0	0	0	0
TGFBI	0	0	0	0	0	0	0	0	0	1	0	0	0	0	0	0	0	0	0	0	0	0	1	0	0	0	0	0	0	0	0	0	0	0	0	0	0	0	0	0	0	0	0	0	1	0	0	0	0
TRIP13	0	0	0	0	0	0	0	0	0	1	2	0	0	0	0	0	0	0	0	0	0	0	0	1	1	0	0	0	0	0	0	0	0	0	0	0	0	0	0	0	0	0	0	0	0	0	0	0	0
U2AF1L5	0	0	0	0	0	0	0	0	0	2	1	0	1	1	0	0	0	0	0	0	0	1	0	1	0	0	0	0	0	1	0	0	0	0	0	0	0	0	0	0	0	0	0	0	0	0	0	0	0
U2SURP	0	0	0	0	0	0	0	0	0	1	1	0	0	0	0	0	0	0	0	0	0	0	0	0	0	0	0	0	0	0	0	0	0	0	0	0	0	0	0	0	0	0	0	0	0	0	0	0	0
VAMP7	0	0	0	0	0	0	0	0	0	1	0	0	0	0	0	0	0	0	0	0	0	0	0	0	0	0	0	0	0	0	0	0	0	0	0	0	0	0	0	0	0	0	0	0	0	0	0	0	0
VPS36	0	0	0	0	0	0	0	0	0	1	0	0	0	0	0	0	0	0	0	0	0	0	1	1	0	0	0	0	1	0	0	0	0	0	0	0	0	0	1	0	2	1	0	0	0	0	1	0	1
XPO7	0	0	0	0	0	0	0	0	0	1	1	0	0	0	0	0	0	0	0	0	0	1	0	0	0	0	0	0	0	1	0	0	0	0	0	0	0	0	0	0	0	0	0	2	1	0	0	0	0
ZNF326	0	0	0	0	0	0	0	0	0	1	1	0	1	0	0	0	0	0	0	0	0	0	0	0	0	0	0	0	0	0	0	0	0	0	0	0	0	0	0	0	0	0	0	0	0	0	0	0	0
ACBD3	0	0	0	0	0	0	0	0	0	0	1	0	0	0	0	0	0	0	0	0	0	0	0	0	0	0	0	0	0	0	0	0	0	0	0	0	0	0	0	0	0	0	0	0	0	0	0	0	0
ACTL6A	0	0	0	0	0	0	0	0	0	0	1	0	0	0	0	1	0	0	0	0	0	0	1	0	0	0	0	0	0	0	0	0	0	0	0	0	0	0	0	0	1	1	0	1	1	0	0	0	0
AQR	0	0	0	0	0	0	0	0	0	0	1	0	0	0	0	0	0	0	0	0	0	0	0	2	0	0	0	0	0	0	0	0	0	0	0	0	0	0	0	0	0	0	0	0	0	0	0	0	0
BAIAP2	0	0	0	0	0	0	0	0	0	0	1	2	2	5	5	0	0	0	0	0	0	0	0	0	0	0	0	0	0	0	0	0	1	0	0	0	0	0	0	0	1	0	1	0	0	0	0	0	0
BCAS2	0	0	0	0	0	0	0	0	0	0	1	0	1	0	0	0	0	0	0	0	0	1	0	0	0	0	0	0	0	0	0	0	0	0	0	0	1	0	0	0	2	1	0	2	0	0	0	0	0
C6orf132	0	0	0	0	0	0	0	0	0	0	1	0	0	0	0	1	1	1	0	0	0	0	0	0	0	0	0	0	1	0	0	0	0	0	0	0	0	0	0	0	0	0	0	0	0	0	0	1	1
CDK2	0	0	0	0	0	0	0	0	0	0	1	0	0	0	2	0	0	0	0	0	0	0	0	0	0	0	0	0	0	1	0	2	0	0	0	0	0	0	0	0	2	1	0	1	0	0	0	0	0
CIAO1	0	0	0	0	0	0	0	0	0	0	1	0	0	0	0	0	0	0	0	0	0	0	0	0	0	0	0	0	0	0	0	0	0	0	0	0	0	0	0	0	0	0	0	0	0	0	0	0	0
CSNK2A1	0	0	0	0	0	0	0	0	0	0	1	0	1	0	0	1	0	0	0	0	0	0	0	0	0	0	0	0	0	0	0	0	0	0	0	0	0	0	0	0	0	0	0	0	0	0	0	0	0
DDX18	0	0	0	0	0	0	0	0	0	0	1	0	0	0	0	0	0	0	0	0	0	0	0	0	0	0	0	0	0	0	0	0	0	0	0	0	0	0	0	0	0	0	0	0	0	0	0	0	0
DYNLT1	0	0	0	0	0	0	0	0	0	0	1	0	0	0	0	0	0	0	0	0	0	0	0	0	0	0	0	0	0	0	0	0	0	0	0	0	0	0	0	0	0	0	1	0	0	0	0	0	0
FANCI	0	0	0	0	0	0	0	0	0	0	1	0	0	0	0	0	0	0	0	0	0	1	0	0	0	0	0	0	0	1	0	0	0	0	0	0	0	0	0	0	1	0	0	0	0	0	0	0	0
FN3KRP	0	0	0	0	0	0	0	0	0	0	1	0	0	0	0	0	0	0	0	0	0	0	0	0	0	0	0	0	0	0	0	0	0	0	0	0	0	0	0	0	0	0	0	0	0	0	0	0	0
G6PD	0	0	0	0	0	0	0	0	0	0	1	0	0	0	0	0	0	0	0	0	0	0	2	0	0	0	0	0	1	1	0	0	0	0	0	0	1	0	0	0	0	0	0	0	0	0	0	0	0
GEMIN6	0	0	0	0	0	0	0	0	0	0	1	0	0	0	0	0	0	0	0	0	0	0	0	0	0	0	0	0	0	0	0	0	0	0	0	0	0	0	0	0	0	0	0	0	0	0	0	0	0
GMDS	0	0	0	0	0	0	0	0	0	0	1	0	0	0	0	0	0	0	0	0	0	0	0	2	0	0	0	0	0	1	0	0	0	0	0	0	0	0	0	0	0	0	0	1	0	0	0	0	0
GRK4	0	0	0	0	0	0	0	0	0	0	1	1	0	0	0	0	0	0	0	1	1	1	0	0	0	0	0	0	0	0	0	0	0	1	1	0	0	1	0	0	1	0	1	1	0	0	0	0	0
GYS1	0	0	0	0	0	0	0	0	0	0	1	1	0	0	0	0	0	1	0	0	0	0	0	1	0	0	0	0	0	0	0	0	0	0	0	0	0	0	0	0	0	0	0	0	0	0	0	0	0
HTRA3	0	0	0	0	0	0	0	0	0	0	1	0	0	0	0	0	0	0	0	0	0	0	0	0	0	0	0	0	0	0	0	0	0	0	0	0	0	0	0	0	0	0	0	0	0	0	0	0	0
IPO11	0	0	0	0	0	0	0	0	0	0	3	0	0	0	0	0	0	0	0	0	0	0	0	0	0	0	0	0	0	0	0	0	0	0	0	0	0	0	0	0	0	1	0	0	0	0	0	0	0
JMJD6	0	0	0	0	0	0	0	0	0	0	1	0	0	0	0	0	0	0	0	0	0	0	0	0	0	0	0	0	0	0	0	0	0	0	0	0	0	0	0	0	0	0	0	0	0	0	0	0	0
KIF1BP	0	0	0	0	0	0	0	0	0	0	1	0	0	0	0	0	0	0	0	0	0	0	0	0	0	0	0	0	0	0	0	0	0	0	0	0	0	0	0	0	0	0	0	0	0	0	0	0	0
KLC1	0	0	0	0	0	0	0	0	0	0	2	0	0	0	0	0	0	0	0	0	0	0	0	0	0	0	0	0	0	0	0	0	0	0	0	0	0	0	0	0	0	0	0	0	0	0	0	0	0
KPNA4	0	0	0	0	0	0	0	0	0	0	1	0	0	0	0	0	0	0	0	0	0	0	0	0	0	0	0	0	0	0	0	0	0	0	0	0	0	0	0	0	0	0	0	0	0	0	0	0	0
KTN1	0	0	0	0	0	0	0	0	0	0	1	0	0	0	0	0	0	0	0	0	0	0	0	0	0	0	0	0	0	0	0	0	0	0	0	0	0	0	0	0	0	0	0	0	0	0	0	0	0
LAP3	0	0	0	0	0	0	0	0	0	0	1	0	0	0	0	0	0	1	0	0	0	0	1	1	0	0	0	0	0	0	0	0	0	0	0	0	0	0	0	0	0	0	0	0	1	0	0	0	0
LGALS3BP	0	0	0	0	0	0	0	0	0	0	1	0	0	0	0	0	0	0	0	0	0	1	0	1	0	0	0	0	0	0	0	0	1	0	0	0	0	0	3	0	0	1	0	2	1	0	0	0	0
MAPRE1	0	0	0	0	0	0	0	0	0	0	1	0	0	0	0	0	0	0	0	0	0	0	0	0	0	0	0	0	0	1	0	0	0	0	0	0	0	0	0	0	0	1	0	0	0	0	0	0	0
MDC1	0	0	0	0	0	0	0	0	0	0	1	0	0	0	0	0	0	0	0	0	0	1	0	0	0	0	0	0	0	0	0	0	0	0	0	0	0	0	0	0	0	0	0	0	0	0	0	0	0
MON2	0	0	0	0	0	0	0	0	0	0	1	0	0	0	0	0	0	0	0	0	0	0	0	0	0	0	0	0	0	0	0	0	0	0	0	0	0	0	0	0	0	0	0	0	0	0	0	0	0
NEFM	0	0	0	0	0	0	0	0	0	0	4	0	0	0	0	0	0	0	0	0	0	0	0	0	0	0	0	0	0	0	0	0	0	0	0	0	0	0	0	0	0	0	0	0	0	0	0	0	0
NTMT1	0	0	0	0	0	0	0	0	0	0	1	0	0	0	0	1	0	1	0	0	0	0	0	0	0	0	0	0	2	1	0	0	0	0	0	0	0	0	0	1	0	0	0	0	0	0	0	0	0
NUP205	0	0	0	0	0	0	0	0	0	0	1	0	0	0	0	0	0	0	0	0	0	1	0	0	0	0	0	0	0	1	0	0	0	0	0	0	0	0	1	0	0	1	0	0	0	0	0	0	0
PANK4	0	0	0	0	0	0	0	0	0	0	1	0	0	0	0	0	0	0	0	0	0	2	0	1	0	0	0	0	0	0	0	0	0	0	0	0	0	0	0	0	0	0	0	0	0	0	0	0	0
PDGFRL	0	0	0	0	0	0	0	0	0	0	1	0	0	0	0	0	0	0	0	0	0	0	0	0	0	0	0	0	0	0	0	0	0	0	0	0	0	0	1	0	0	0	0	0	0	0	0	0	0
PES1	0	0	0	0	0	0	0	0	0	0	1	0	0	0	0	0	0	0	0	0	0	0	0	0	0	0	0	0	0	0	0	0	0	0	0	0	0	0	0	0	0	0	0	0	0	0	0	0	0
PIP4K2A	0	0	0	0	0	0	0	0	0	0	1	0	1	1	1	1	0	0	0	0	0	0	1	0	0	0	0	1	0	0	0	0	0	0	0	0	0	0	1	0	0	0	0	0	0	0	0	0	0
POLR1C	0	0	0	0	0	0	0	0	0	0	1	1	0	0	0	0	0	0	0	0	0	1	1	1	0	0	0	0	0	2	0	0	0	0	0	0	0	0	0	0	0	0	0	0	1	0	0	0	0
PPAT	0	0	0	0	0	0	0	0	0	0	1	1	0	0	0	1	0	1	0	0	0	1	1	2	0	0	0	0	1	1	0	0	0	0	0	0	0	0	0	0	0	0	0	0	0	0	0	0	0
PPP6R3	0	0	0	0	0	0	0	0	0	0	1	0	0	0	0	0	0	0	0	0	0	0	0	0	0	0	0	0	0	1	0	0	0	0	0	0	0	0	0	0	0	0	0	0	0	0	0	0	0
PUM1	0	0	0	0	0	0	0	0	0	0	1	0	0	0	0	0	0	0	0	0	0	0	0	0	0	0	0	0	1	1	0	0	0	0	0	0	0	0	0	0	0	0	0	0	0	0	0	0	0
QTRT1	0	0	0	0	0	0	0	0	0	0	1	0	0	0	0	0	0	0	0	0	0	0	1	0	0	0	0	0	0	1	0	0	0	0	0	0	1	0	0	0	0	1	1	0	0	0	0	0	0
RNF123	0	0	0	0	0	0	0	0	0	0	1	0	0	0	0	0	0	0	0	0	0	1	0	0	1	1	0	0	0	0	0	0	0	0	0	0	0	0	0	0	0	0	0	1	1	0	0	0	0
RPL23A	0	0	0	0	0	0	0	0	0	0	2	0	1	0	0	0	0	0	0	0	0	1	0	0	0	0	0	0	0	1	0	0	0	0	0	0	0	0	0	0	0	0	0	0	0	0	0	0	0
SF3A1	0	0	0	0	0	0	0	0	0	0	2	0	0	0	1	0	0	0	0	0	0	0	0	1	0	0	0	0	0	1	0	0	0	0	0	0	0	0	1	0	0	0	0	0	0	0	0	0	0
SF3A3	0	0	0	0	0	0	0	0	0	0	1	0	0	0	0	0	0	0	0	0	0	0	0	0	0	0	0	0	0	0	0	0	0	0	0	0	0	0	0	0	0	0	0	0	0	0	0	0	0
SF3B6	0	0	0	0	0	0	0	0	0	0	1	1	0	0	0	1	1	0	0	0	0	1	0	1	0	0	0	0	1	0	0	0	1	0	0	0	0	0	1	0	0	0	0	1	0	1	0	0	0
SMARCA5	0	0	0	0	0	0	0	0	0	0	2	0	0	0	0	0	0	0	0	0	0	0	0	1	0	0	0	0	0	1	0	0	0	0	0	0	0	0	0	0	0	0	0	1	1	0	0	0	0
SNRNP40	0	0	0	0	0	0	0	0	0	0	2	0	0	0	0	0	0	1	0	0	0	1	0	0	0	0	0	0	0	1	0	0	0	0	0	0	1	0	0	1	1	0	0	0	0	0	0	0	0
SNRPB	0	0	0	0	0	0	0	0	0	0	1	0	0	0	0	0	1	0	1	1	0	1	1	0	1	0	1	1	0	1	1	0	1	0	1	0	1	0	0	1	0	0	0	0	0	1	0	1	2
SNRPD3	0	0	0	0	0	0	0	0	0	0	2	0	0	0	0	0	1	1	1	0	0	1	1	1	1	0	0	1	0	0	0	0	0	0	0	0	1	0	0	0	0	0	0	1	2	0	0	0	0
SPATA5	0	0	0	0	0	0	0	0	0	0	1	1	0	0	0	0	0	0	0	0	0	1	0	0	0	0	0	0	1	0	0	0	0	0	0	0	0	1	0	0	0	0	0	1	0	0	0	0	0
SPC24	0	0	0	0	0	0	0	0	0	0	1	0	0	0	0	0	0	0	0	0	0	0	0	0	0	0	0	0	0	0	0	0	0	0	0	0	0	0	0	0	0	1	0	0	0	0	0	0	0
TARBP1	0	0	0	0	0	0	0	0	0	0	1	0	0	0	0	0	0	0	0	0	0	0	0	0	0	0	0	0	0	0	0	0	0	0	0	0	0	0	0	0	1	1	1	0	0	0	0	0	0
TBCD	0	0	0	0	0	0	0	0	0	0	1	0	0	0	0	0	0	0	0	0	0	0	1	0	0	0	0	0	0	0	0	0	0	0	0	0	0	0	0	0	1	0	0	0	0	0	0	0	0
TBL3	0	0	0	0	0	0	0	0	0	0	1	0	0	0	0	0	0	0	0	0	0	1	0	0	0	0	0	0	0	0	0	0	0	0	0	0	1	1	0	1	0	0	0	0	0	0	0	0	0
TROVE2	0	0	0	0	0	0	0	0	0	0	1	0	0	0	0	0	0	0	0	0	0	0	0	0	0	0	0	0	1	1	0	0	0	0	0	0	0	0	0	0	1	0	0	0	0	0	0	0	0
UTP18	0	0	0	0	0	0	0	0	0	0	2	0	0	0	0	0	0	0	0	0	0	0	0	0	0	0	0	0	0	0	0	0	0	0	0	0	0	0	0	0	0	0	0	0	0	0	0	0	0
VTI1A	0	0	0	0	0	0	0	0	0	0	1	0	0	0	0	0	0	0	0	0	0	0	0	0	0	0	0	0	0	0	0	0	0	0	0	0	0	0	0	0	0	0	0	0	0	0	0	0	0
WDR33	0	0	0	0	0	0	0	0	0	0	1	0	0	0	0	0	0	0	0	0	0	1	0	0	0	0	0	0	0	0	0	0	0	0	0	0	0	0	1	0	0	0	0	1	0	0	0	0	0
ABI1	0	0	0	0	0	0	0	0	0	0	0	1	0	0	0	0	0	0	0	1	1	0	0	0	0	0	0	0	0	1	0	0	0	0	0	0	0	0	0	0	0	1	0	1	0	0	0	0	0
AGO1	0	0	0	0	0	0	0	0	0	0	0	3	0	0	0	0	0	0	0	0	0	0	0	0	0	0	0	0	0	0	0	0	0	0	0	0	0	0	0	0	0	0	0	0	0	0	0	0	0
ATP6V0A1	0	0	0	0	0	0	0	0	0	0	0	2	0	0	0	0	0	0	0	0	0	0	0	0	0	0	0	0	0	1	0	0	0	0	0	0	0	0	0	0	0	0	0	0	0	0	0	0	0
ATP6V0D1	0	0	0	0	0	0	0	0	0	0	0	1	0	0	0	0	0	0	0	0	0	0	0	0	0	0	0	0	0	0	0	0	1	0	0	0	0	0	0	0	0	0	0	0	0	0	0	0	1
BOLA2	0	0	0	0	0	0	0	0	0	0	0	1	0	0	1	0	0	0	0	0	0	0	0	0	0	0	0	0	0	0	0	0	0	0	0	0	0	0	0	0	0	0	0	0	0	1	0	0	0
BTN2A1	0	0	0	0	0	0	0	0	0	0	0	1	2	1	1	0	0	0	0	0	1	0	1	1	0	0	0	0	0	0	0	0	1	0	1	0	0	0	0	0	0	1	0	0	0	0	0	0	0
CKM	0	0	0	0	0	0	0	0	0	0	0	1	0	0	0	0	0	0	0	0	0	0	0	0	0	0	0	0	0	0	0	0	0	0	0	0	0	0	0	0	0	0	0	0	0	0	0	0	0
CLDN12	0	0	0	0	0	0	0	0	0	0	0	1	1	1	1	0	1	0	0	0	0	0	0	0	0	0	0	0	0	0	0	0	1	0	0	0	0	0	0	0	0	0	0	0	0	0	0	0	0
CPNE2	0	0	0	0	0	0	0	0	0	0	0	1	1	1	1	1	1	1	1	1	0	0	0	0	0	0	0	0	2	0	0	0	0	0	0	0	0	0	0	0	0	0	0	0	0	0	0	1	0
CYB5B	0	0	0	0	0	0	0	0	0	0	0	1	0	0	0	0	0	0	0	0	0	0	0	0	0	0	0	0	0	0	0	0	0	0	0	0	0	0	0	0	0	0	0	0	0	0	0	0	0
DLG4	0	0	0	0	0	0	0	0	0	0	0	1	0	0	0	0	0	0	0	0	0	0	0	0	0	0	0	0	0	0	0	0	0	0	0	0	0	0	0	0	0	0	0	0	0	0	0	0	0
ENAH	0	0	0	0	0	0	0	0	0	0	0	1	1	1	1	0	0	0	0	0	0	0	0	0	0	0	0	0	0	0	0	0	0	0	0	0	0	0	0	0	0	0	0	0	0	0	0	0	0
EPB41	0	0	0	0	0	0	0	0	0	0	0	1	2	4	4	0	0	0	0	0	0	0	0	0	0	0	0	0	0	0	0	0	0	0	0	0	0	0	0	0	0	0	0	0	0	0	0	0	0
F11	0	0	0	0	0	0	0	0	0	0	0	1	0	0	0	0	0	0	1	0	0	0	1	1	0	0	0	0	0	0	0	1	1	0	0	0	0	1	1	0	1	1	0	2	2	0	0	0	0
FAM129B	0	0	0	0	0	0	0	0	0	0	0	1	1	0	0	0	0	0	0	0	0	0	0	0	0	0	0	0	0	0	0	0	0	0	0	0	0	0	0	0	1	0	1	1	0	0	0	0	0
FAM168B	0	0	0	0	0	0	0	0	0	0	0	1	0	1	1	0	0	0	0	0	0	0	0	0	0	0	0	0	0	0	0	0	0	0	0	0	0	0	0	0	0	0	0	0	0	0	0	0	0
FUCA2	0	0	0	0	0	0	0	0	0	0	0	1	0	0	0	0	0	1	0	0	0	1	0	0	0	0	0	0	0	0	0	0	0	0	0	0	0	0	0	0	0	0	0	0	0	0	0	0	0
GALNT2	0	0	0	0	0	0	0	0	0	0	0	1	0	0	0	0	0	0	0	0	0	0	0	0	0	0	0	0	0	0	0	0	0	0	0	0	0	0	0	0	0	0	0	0	0	0	0	0	0
GOLIM4	0	0	0	0	0	0	0	0	0	0	0	1	8	2	3	0	0	0	0	0	0	0	0	0	0	0	0	0	0	0	0	0	0	0	0	0	0	0	0	0	0	0	0	0	0	0	0	0	0
GPRC5C	0	0	0	0	0	0	0	0	0	0	0	1	0	0	0	1	0	0	0	0	0	0	0	1	0	0	0	0	0	0	1	0	0	0	0	0	0	0	0	0	0	0	0	0	0	0	0	0	0
GRINA	0	0	0	0	0	0	0	0	0	0	0	1	0	0	0	0	0	0	0	0	0	0	0	0	0	0	0	0	0	0	0	0	0	0	0	0	0	0	0	0	0	0	0	0	0	0	0	0	0
HAT1	0	0	0	0	0	0	0	0	0	0	0	1	0	0	0	1	0	0	0	0	0	1	1	1	0	0	0	1	0	0	0	0	0	0	0	0	0	0	1	0	0	0	0	0	0	0	0	0	0
HIST1H2BJ	0	0	0	0	0	0	0	0	0	0	0	1	0	0	0	1	1	0	0	0	0	1	0	1	0	0	0	1	0	0	0	0	0	0	0	0	0	0	0	0	0	0	1	0	0	0	0	0	0
HMCN1	0	0	0	0	0	0	0	0	0	0	0	1	0	0	0	0	0	0	0	0	1	0	0	0	0	0	0	0	0	0	0	1	0	0	0	0	0	0	0	0	0	0	0	0	0	0	0	0	0
HS2ST1	0	0	0	0	0	0	0	0	0	0	0	1	0	0	0	0	0	0	0	0	0	0	0	0	0	0	0	0	0	0	0	0	0	0	0	0	0	0	0	0	0	0	0	0	0	0	0	0	0
IFNGR1	0	0	0	0	0	0	0	0	0	0	0	1	1	1	0	0	0	0	0	0	0	0	0	0	0	0	0	0	0	0	0	0	1	0	0	0	0	0	0	0	0	0	0	0	0	0	0	0	0
KRAS	0	0	0	0	0	0	0	0	0	0	0	2	0	0	0	0	0	0	0	0	0	0	0	0	0	0	0	0	0	0	0	0	0	0	0	0	0	0	0	0	0	0	0	0	0	0	0	0	0
LANCL1	0	0	0	0	0	0	0	0	0	0	0	1	1	0	0	0	1	0	0	1	0	0	1	0	0	0	0	0	1	0	0	0	0	0	1	0	0	0	1	0	1	1	0	0	0	0	0	0	0
LCAT	0	0	0	0	0	0	0	0	0	0	0	1	1	1	1	0	0	1	0	0	0	1	0	1	0	0	1	0	0	1	0	0	0	0	0	0	1	0	0	0	0	0	0	0	0	1	0	0	0
MYL1	0	0	0	0	0	0	0	0	0	0	0	1	0	0	0	0	0	0	0	0	0	0	0	0	0	0	0	0	0	0	0	0	0	0	0	0	0	0	0	0	0	0	0	0	0	0	0	0	0
MYLPF	0	0	0	0	0	0	0	0	0	0	0	1	0	0	0	0	0	0	0	0	0	0	0	0	0	0	0	0	0	0	0	0	0	0	0	0	0	0	0	0	0	0	0	0	0	0	0	0	0
PDIA3	0	0	0	0	0	0	0	0	0	0	0	1	0	0	0	0	0	0	0	0	0	0	0	0	0	0	0	0	0	0	0	0	1	0	0	0	0	0	1	0	0	0	0	0	0	0	2	0	1
PDIA6	0	0	0	0	0	0	0	0	0	0	0	1	0	0	0	0	0	0	0	0	0	0	0	0	0	0	0	0	0	0	0	0	0	0	0	0	0	0	0	0	1	0	0	0	0	1	1	0	0
PEBP1	0	0	0	0	0	0	0	0	0	0	0	1	0	0	0	0	0	0	0	0	0	0	0	0	0	0	0	0	0	0	0	0	0	0	0	0	0	0	0	1	1	1	0	0	0	0	0	0	0
PPA2	0	0	0	0	0	0	0	0	0	0	0	1	0	0	0	0	0	0	0	0	0	1	0	0	0	0	0	0	0	0	0	0	0	0	0	0	0	0	0	0	0	0	0	0	0	0	0	0	0
PRSS1	0	0	0	0	0	0	0	0	0	0	0	1	0	0	0	0	0	0	0	0	0	0	0	0	1	0	0	0	0	0	0	0	0	0	0	0	0	0	0	0	1	1	0	1	0	0	0	0	0
PTPRD	0	0	0	0	0	0	0	0	0	0	0	1	0	0	0	0	0	0	0	0	0	0	0	0	0	0	0	0	0	1	0	0	0	0	0	0	0	0	0	0	0	0	0	0	0	0	0	0	0
RPL31	0	0	0	0	0	0	0	0	0	0	0	1	0	0	0	0	0	1	0	0	0	0	0	0	0	0	0	2	0	0	0	0	0	0	0	0	0	0	0	0	0	0	0	0	0	0	0	0	0
RPN1	0	0	0	0	0	0	0	0	0	0	0	1	0	0	0	0	0	0	0	0	0	0	0	0	0	0	0	0	0	0	0	0	0	0	0	0	0	0	0	0	1	0	0	0	0	0	0	0	1
SLC26A6	0	0	0	0	0	0	0	0	0	0	0	1	1	0	0	0	0	0	0	0	0	0	0	0	0	0	0	0	0	0	0	0	0	0	0	0	0	0	0	0	0	0	0	0	0	0	0	0	0
SLC43A1	0	0	0	0	0	0	0	0	0	0	0	1	1	0	0	0	0	0	1	0	0	0	1	0	0	0	0	0	0	0	0	0	0	0	0	1	0	1	0	0	0	0	0	0	0	0	1	0	0
SLC44A2	0	0	0	0	0	0	0	0	0	0	0	1	1	1	1	0	0	0	0	1	0	1	2	1	0	0	1	0	0	0	1	0	2	0	0	0	1	6	1	0	1	1	1	0	0	0	1	1	1
SLK	0	0	0	0	0	0	0	0	0	0	0	1	0	0	0	0	0	0	0	0	0	0	0	0	0	0	0	0	0	0	0	0	0	0	0	0	0	0	0	0	0	0	0	0	0	0	0	0	0
SPP2	0	0	0	0	0	0	0	0	0	0	0	1	0	0	0	0	0	0	0	0	0	0	0	0	0	0	0	0	1	1	0	0	0	0	0	0	0	0	0	0	0	0	0	0	0	0	0	0	0
STX6	0	0	0	0	0	0	0	0	0	0	0	1	0	0	0	0	0	0	0	0	0	0	1	0	0	0	0	0	0	0	0	0	0	0	0	0	0	0	0	0	0	0	0	0	0	0	0	0	0
STXBP1	0	0	0	0	0	0	0	0	0	0	0	1	0	1	1	0	0	0	0	0	0	0	0	0	0	0	0	0	0	0	0	0	0	0	0	0	0	0	0	0	2	2	0	0	0	0	0	0	0
SYNGR2	0	0	0	0	0	0	0	0	0	0	0	1	0	0	0	0	0	0	0	0	0	0	0	0	0	0	0	0	0	0	0	0	0	0	0	0	0	0	0	0	0	0	0	0	0	0	0	0	1
TM9SF2	0	0	0	0	0	0	0	0	0	0	0	2	0	1	0	0	0	0	0	0	0	0	0	0	0	0	0	0	0	0	0	0	0	0	0	0	0	0	0	0	0	0	0	0	0	1	0	0	0
TNNC2	0	0	0	0	0	0	0	0	0	0	0	2	0	0	0	0	0	0	0	0	0	0	0	0	0	0	0	0	0	0	0	0	0	0	0	0	0	0	0	0	0	0	0	0	0	0	0	0	0
TPM2	0	0	0	0	0	0	0	0	0	0	0	3	0	0	0	0	0	0	0	0	0	0	0	0	0	0	0	0	0	0	0	0	0	0	0	0	0	0	0	0	0	0	0	0	0	0	0	0	0
TSPAN14	0	0	0	0	0	0	0	0	0	0	0	1	0	0	0	0	1	0	0	1	1	1	0	0	0	0	1	0	0	0	1	0	1	0	0	0	0	0	1	0	1	2	0	1	0	2	0	1	2
TSPAN3	0	0	0	0	0	0	0	0	0	0	0	1	0	0	0	0	1	1	0	1	1	0	0	0	0	0	1	0	0	0	2	0	0	0	0	0	0	1	1	0	0	0	0	0	0	1	0	0	1
ADAM9	0	0	0	0	0	0	0	0	0	0	0	0	1	0	0	0	0	0	0	1	0	0	1	0	0	0	0	0	0	0	0	0	0	0	0	0	0	0	0	0	0	0	0	0	0	0	0	0	0
ADGRL1	0	0	0	0	0	0	0	0	0	0	0	0	1	0	0	0	0	0	0	0	0	0	0	0	0	0	0	0	0	0	0	0	0	0	0	0	0	1	0	0	0	0	0	0	0	0	0	0	0
AGRN	0	0	0	0	0	0	0	0	0	0	0	0	4	1	0	0	0	0	0	0	0	0	0	0	0	0	0	0	0	0	0	0	0	0	0	0	0	0	0	0	0	0	0	0	0	0	0	0	0
ANXA1	0	0	0	0	0	0	0	0	0	0	0	0	1	1	0	0	0	0	0	0	0	0	0	0	0	0	0	0	0	0	0	0	0	0	0	0	0	0	0	0	8	0	0	0	0	0	0	0	0
ATP2B4	0	0	0	0	0	0	0	0	0	0	0	0	1	0	0	0	0	0	0	0	0	0	0	0	0	0	0	0	0	0	0	0	0	0	0	0	0	0	0	0	0	2	0	0	0	0	0	0	0
AURKA	0	0	0	0	0	0	0	0	0	0	0	0	1	0	0	0	0	0	0	0	0	0	0	0	0	0	0	0	0	1	0	0	1	0	0	0	0	0	0	0	4	4	0	0	0	0	0	0	0
AURKB	0	0	0	0	0	0	0	0	0	0	0	0	2	1	1	0	0	0	0	0	0	0	0	1	0	0	0	0	0	0	0	0	1	1	0	0	0	0	0	4	5	4	5	2	2	2	1	4	2
C19orf25	0	0	0	0	0	0	0	0	0	0	0	0	1	1	0	0	0	0	0	0	0	0	0	0	0	0	0	0	0	0	0	0	0	0	0	0	0	0	0	0	1	1	0	0	0	0	0	0	0
CASC3	0	0	0	0	0	0	0	0	0	0	0	0	1	0	1	0	0	0	0	0	0	0	0	0	0	0	0	0	0	0	0	0	0	0	0	0	0	0	0	0	0	0	0	0	0	0	0	0	0
CASC4	0	0	0	0	0	0	0	0	0	0	0	0	1	0	1	0	0	0	0	0	0	0	0	0	0	0	0	0	0	0	0	0	0	0	0	0	0	0	0	0	0	0	0	0	0	0	0	0	0
CC2D1B	0	0	0	0	0	0	0	0	0	0	0	0	3	0	0	0	0	0	0	0	0	0	0	0	0	0	0	0	0	0	0	0	1	0	1	0	1	0	1	0	0	0	0	0	0	0	0	0	0
CCDC124	0	0	0	0	0	0	0	0	0	0	0	0	1	1	0	0	0	0	0	0	0	0	0	0	0	0	0	0	0	0	0	0	0	0	0	0	0	0	0	0	0	0	0	0	0	0	0	0	0
CCNB1	0	0	0	0	0	0	0	0	0	0	0	0	2	2	2	0	0	0	0	0	0	0	0	0	0	0	0	0	0	0	0	0	0	0	0	0	1	0	0	0	0	1	0	1	1	0	0	0	0
CD59	0	0	0	0	0	0	0	0	0	0	0	0	1	0	0	0	0	0	1	0	0	0	0	0	0	0	0	0	0	0	0	0	1	1	0	0	0	0	0	0	2	1	1	1	0	1	0	1	0
CDC20	0	0	0	0	0	0	0	0	0	0	0	0	1	0	0	0	0	0	0	0	0	0	0	0	0	0	0	0	0	0	0	0	0	0	0	0	0	0	0	0	0	0	0	0	0	0	0	0	0
CDC5L	0	0	0	0	0	0	0	0	0	0	0	0	1	0	0	0	0	0	0	0	0	0	1	0	0	0	0	0	0	0	0	0	0	0	0	0	0	0	0	0	0	0	0	0	0	0	0	0	0
CRKL	0	0	0	0	0	0	0	0	0	0	0	0	1	0	0	0	0	0	0	0	0	0	0	0	0	0	0	0	0	0	0	0	0	0	0	0	0	0	0	0	0	0	0	0	0	0	0	0	0
CSK	0	0	0	0	0	0	0	0	0	0	0	0	1	0	0	0	0	0	0	0	0	0	0	0	0	0	0	0	0	0	0	0	0	0	0	0	0	0	0	0	1	1	0	1	0	0	0	0	0
CSNK1E	0	0	0	0	0	0	0	0	0	0	0	0	1	0	0	0	0	0	0	0	0	0	0	1	0	0	0	2	2	2	1	1	5	3	5	6	0	6	3	5	4	4	8	1	2	0	0	0	0
CSPG4	0	0	0	0	0	0	0	0	0	0	0	0	3	1	1	0	0	0	0	2	2	0	1	1	0	0	0	0	0	0	0	0	4	0	1	0	0	1	5	0	1	2	0	0	0	0	0	0	0
CSTB	0	0	0	0	0	0	0	0	0	0	0	0	2	1	1	0	0	0	0	0	0	0	0	0	0	0	0	0	0	0	0	0	0	0	0	0	0	0	0	0	2	0	0	0	0	0	0	1	1
CTDSP1	0	0	0	0	0	0	0	0	0	0	0	0	1	0	0	0	0	0	0	0	0	0	0	0	0	0	0	0	0	0	0	0	0	0	0	0	0	0	0	0	0	0	0	0	0	0	0	0	0
CTTN	0	0	0	0	0	0	0	0	0	0	0	0	1	0	0	0	0	0	0	0	0	0	0	0	0	0	0	0	0	0	0	0	0	0	0	0	0	0	0	0	0	0	0	0	0	0	0	0	0
CUL3	0	0	0	0	0	0	0	0	0	0	0	0	1	0	0	0	0	0	0	0	0	0	0	0	0	0	0	0	0	0	0	0	0	1	0	0	0	0	0	0	0	0	0	0	0	0	0	0	0
CXCR4	0	0	0	0	0	0	0	0	0	0	0	0	1	0	0	0	0	0	0	0	0	0	0	0	0	0	0	0	0	0	0	0	0	0	0	0	0	0	1	0	0	0	0	0	0	0	0	0	0
DAG1	0	0	0	0	0	0	0	0	0	0	0	0	1	1	1	0	0	0	0	1	0	1	0	1	0	0	0	0	0	0	1	0	1	0	0	0	0	0	1	0	1	0	0	0	0	1	0	0	0
DDAH1	0	0	0	0	0	0	0	0	0	0	0	0	1	0	0	0	0	0	0	0	0	0	0	0	0	0	0	0	0	0	0	0	0	0	0	0	0	0	0	0	0	0	0	0	0	0	0	0	0
DLG1	0	0	0	0	0	0	0	0	0	0	0	0	3	2	1	0	0	0	0	0	0	0	0	0	0	0	0	0	0	0	0	0	0	0	0	0	0	0	0	0	1	1	0	0	0	0	0	0	0
DSC2	0	0	0	0	0	0	0	0	0	0	0	0	2	0	0	0	0	0	0	2	1	2	3	2	0	0	0	0	0	0	0	0	0	1	0	0	1	1	1	0	3	0	0	0	0	0	0	0	0
EDF1	0	0	0	0	0	0	0	0	0	0	0	0	1	1	1	0	0	0	0	1	1	0	0	0	0	0	0	0	0	0	0	0	0	0	0	0	0	0	0	0	1	2	0	0	0	0	0	0	0
EFNB3	0	0	0	0	0	0	0	0	0	0	0	0	1	0	0	0	0	0	0	0	0	0	0	0	0	0	0	0	0	0	0	0	0	0	0	0	0	0	0	0	0	0	0	0	0	0	0	0	0
EIF1	0	0	0	0	0	0	0	0	0	0	0	0	1	0	0	0	0	0	0	0	0	0	0	0	0	0	0	0	0	0	0	0	0	0	0	0	0	0	0	0	1	1	0	0	0	0	0	0	0
EIF4H	0	0	0	0	0	0	0	0	0	0	0	0	1	1	0	0	0	0	0	0	0	0	0	0	0	0	0	0	0	0	0	0	0	0	0	0	0	0	0	0	0	2	0	0	0	0	0	0	0
ELAVL1	0	0	0	0	0	0	0	0	0	0	0	0	1	1	0	0	0	0	0	0	0	0	0	0	0	0	0	0	0	0	0	0	0	0	0	0	0	0	0	0	0	0	0	0	0	0	0	0	0
EPB41L3	0	0	0	0	0	0	0	0	0	0	0	0	1	2	1	0	0	0	0	0	0	0	0	0	0	0	0	0	0	0	0	0	1	0	0	0	0	0	0	0	1	0	0	0	0	0	0	0	0
EPB41L5	0	0	0	0	0	0	0	0	0	0	0	0	1	0	0	0	0	0	0	0	0	0	0	0	0	0	0	0	0	0	0	0	0	0	0	0	0	0	0	0	0	0	0	0	0	0	0	0	0
EPHB2	0	0	0	0	0	0	0	0	0	0	0	0	1	0	0	0	0	0	0	0	0	0	0	0	0	0	0	0	0	0	0	0	0	0	0	0	0	0	0	0	0	0	0	0	0	0	0	0	0
EPN3	0	0	0	0	0	0	0	0	0	0	0	0	1	0	1	0	0	0	0	0	0	0	0	0	0	0	0	0	0	0	0	0	0	0	0	0	0	0	0	0	0	0	0	0	0	0	0	0	0
EVA1B	0	0	0	0	0	0	0	0	0	0	0	0	3	1	1	0	0	0	0	0	0	0	0	0	0	0	0	0	0	0	0	0	0	0	0	0	0	0	0	0	0	0	0	0	0	0	0	0	0
FAM49B	0	0	0	0	0	0	0	0	0	0	0	0	3	2	3	0	0	0	0	0	0	2	3	1	0	0	0	0	0	2	0	0	0	0	0	0	0	1	0	0	1	1	0	0	0	0	0	1	0
FGFR1	0	0	0	0	0	0	0	0	0	0	0	0	1	0	0	0	0	0	0	0	0	0	0	0	0	0	0	0	0	0	0	0	0	0	0	0	0	0	0	0	0	0	0	0	0	0	0	0	0
FGFRL1	0	0	0	0	0	0	0	0	0	0	0	0	2	1	0	0	0	0	0	0	0	0	0	0	0	0	0	0	0	0	0	0	0	1	1	2	0	0	0	0	0	0	0	0	0	0	0	0	0
FLOT1	0	0	0	0	0	0	0	0	0	0	0	0	3	3	2	1	3	2	1	1	0	0	0	0	0	0	0	0	0	0	0	0	1	0	0	0	0	0	0	0	0	0	0	0	0	0	0	0	0
FMNL2	0	0	0	0	0	0	0	0	0	0	0	0	2	0	3	0	1	0	0	0	0	0	0	0	0	0	0	0	0	0	0	0	0	0	0	0	0	0	0	0	0	0	0	0	0	0	0	0	0
GPC6	0	0	0	0	0	0	0	0	0	0	0	0	1	0	0	0	0	0	0	0	0	0	0	0	0	0	0	0	0	0	0	0	0	0	0	0	0	0	0	0	0	0	0	0	0	0	0	0	0
GRK6	0	0	0	0	0	0	0	0	0	0	0	0	2	0	2	0	0	0	0	0	0	0	0	0	0	0	0	0	0	0	0	0	0	0	0	0	0	0	0	0	1	2	0	0	0	0	0	0	0
GSTA4	0	0	0	0	0	0	0	0	0	0	0	0	1	0	0	0	0	0	0	0	0	0	0	0	0	0	0	0	0	0	0	0	0	0	0	0	0	0	0	0	0	0	0	0	0	0	0	0	0
HLA-B	0	0	0	0	0	0	0	0	0	0	0	0	4	3	3	0	0	0	0	0	0	1	2	2	0	0	1	0	0	1	0	0	0	4	2	1	0	1	0	0	1	1	0	0	0	0	0	0	1
HNRNPAB	0	0	0	0	0	0	0	0	0	0	0	0	1	3	0	0	0	0	0	0	0	0	0	0	0	0	0	0	0	0	0	0	0	0	0	0	0	0	0	0	0	0	0	0	0	0	0	0	0
HNRNPR	0	0	0	0	0	0	0	0	0	0	0	0	3	0	1	0	0	0	0	0	0	0	0	0	0	0	0	0	0	0	0	0	0	0	0	0	0	0	0	0	0	0	0	0	0	0	0	0	0
HSPG2	0	0	0	0	0	0	0	0	0	0	0	0	2	0	0	0	0	0	0	0	0	0	0	0	0	0	0	0	0	0	0	0	0	0	0	0	0	0	0	0	0	0	0	0	0	0	0	0	0
ICOSLG	0	0	0	0	0	0	0	0	0	0	0	0	1	0	0	0	0	0	0	0	0	0	0	0	0	0	0	0	0	0	0	0	0	0	0	0	0	0	0	0	1	0	0	0	0	0	0	0	0
IMPAD1	0	0	0	0	0	0	0	0	0	0	0	0	2	0	0	0	0	0	0	0	0	1	0	0	0	0	0	0	0	0	0	0	0	0	0	0	0	0	0	0	0	0	0	0	0	0	0	0	0
INPP5A	0	0	0	0	0	0	0	0	0	0	0	0	1	0	0	0	0	0	0	0	0	0	0	0	0	0	0	0	0	0	0	0	0	0	0	0	0	0	1	0	0	0	0	0	0	0	0	0	0
ITGA2	0	0	0	0	0	0	0	0	0	0	0	0	1	0	1	0	0	0	0	0	0	0	0	0	0	0	0	0	0	0	0	0	2	0	0	0	1	1	2	0	1	2	0	0	0	0	0	1	1
ITGA5	0	0	0	0	0	0	0	0	0	0	0	0	3	0	1	0	0	0	1	2	1	0	2	2	0	0	1	0	1	0	1	0	0	0	0	0	1	1	2	0	1	0	0	0	0	0	0	1	0
ITGA6	0	0	0	0	0	0	0	0	0	0	0	0	4	0	1	1	1	2	2	1	2	1	0	2	0	0	2	0	0	0	2	0	1	0	3	1	3	3	1	0	1	0	0	0	0	1	0	0	2
ITGAV	0	0	0	0	0	0	0	0	0	0	0	0	4	1	5	0	0	0	0	0	0	0	0	0	0	0	0	0	0	0	0	0	0	0	0	0	0	0	0	0	1	1	0	0	0	0	0	0	0
ITM2C	0	0	0	0	0	0	0	0	0	0	0	0	1	0	1	0	0	0	0	0	0	0	0	0	0	0	0	0	0	0	0	0	0	0	0	0	0	0	0	0	0	0	0	0	0	0	0	0	0
KIAA1522	0	0	0	0	0	0	0	0	0	0	0	0	1	0	0	0	0	0	0	0	0	0	0	0	0	0	0	0	0	0	0	0	0	0	0	0	0	0	0	0	0	0	0	0	0	0	0	0	0
KIF20B	0	0	0	0	0	0	0	0	0	0	0	0	1	0	0	0	0	0	0	0	0	0	0	0	0	0	0	0	0	0	0	0	0	0	0	0	0	0	0	0	0	0	0	0	0	0	0	0	0
KIRREL	0	0	0	0	0	0	0	0	0	0	0	0	1	1	0	2	0	0	3	1	2	2	2	1	0	0	3	0	1	0	0	0	4	0	0	0	0	0	2	0	2	1	0	1	1	1	0	1	0
KLRG2	0	0	0	0	0	0	0	0	0	0	0	0	1	1	2	0	0	0	0	0	0	0	0	0	0	0	0	0	0	0	0	0	0	0	0	0	0	0	0	0	0	0	0	0	0	0	0	0	0
LAMA1	0	0	0	0	0	0	0	0	0	0	0	0	3	0	0	0	0	0	0	0	0	0	0	0	0	0	0	0	0	0	0	0	0	1	0	0	0	0	0	0	0	0	0	0	0	0	0	0	0
LAMA5	0	0	0	0	0	0	0	0	0	0	0	0	3	0	0	0	0	0	0	0	0	0	0	0	0	0	0	0	0	0	0	0	0	1	0	0	0	0	0	0	0	0	0	0	0	0	0	0	0
LAMC1	0	0	0	0	0	0	0	0	0	0	0	0	3	1	0	0	0	0	0	0	0	0	0	0	0	0	0	0	0	0	0	0	0	1	0	1	0	0	0	0	0	0	0	0	0	0	0	0	0
LAPTM4A	0	0	0	0	0	0	0	0	0	0	0	0	1	0	0	0	0	0	0	0	0	0	0	0	0	0	0	0	0	0	0	0	0	0	0	0	0	0	0	0	0	0	0	0	0	0	0	0	0
LARP1	0	0	0	0	0	0	0	0	0	0	0	0	1	0	1	0	0	0	0	0	0	0	0	0	0	0	0	0	0	0	0	0	0	0	0	0	0	0	0	0	0	0	0	0	0	0	0	0	0
LDLR	0	0	0	0	0	0	0	0	0	0	0	0	4	6	5	0	0	0	1	0	0	0	0	0	0	0	0	1	1	1	0	0	1	0	1	0	0	0	0	0	1	0	0	1	1	0	0	0	0
LIN7C	0	0	0	0	0	0	0	0	0	0	0	0	2	0	2	0	0	0	0	0	0	0	0	0	0	0	0	0	0	0	0	0	0	0	0	0	0	0	0	0	0	0	0	0	0	0	0	0	0
LRP6	0	0	0	0	0	0	0	0	0	0	0	0	2	1	2	0	1	0	0	0	0	0	0	0	0	0	0	0	0	0	0	0	0	0	0	0	0	0	0	0	0	2	0	0	0	0	0	0	1
LUC7L3	0	0	0	0	0	0	0	0	0	0	0	0	1	0	0	0	0	0	0	0	0	0	0	0	0	0	0	0	0	0	0	0	0	0	0	0	0	0	0	0	0	0	0	0	0	0	0	0	0
MARK2	0	0	0	0	0	0	0	0	0	0	0	0	1	1	1	0	0	0	0	0	0	0	0	0	0	0	0	0	0	0	0	0	1	0	0	0	0	1	0	0	2	5	1	1	0	0	0	0	0
MDH1	0	0	0	0	0	0	0	0	0	0	0	0	1	0	0	0	0	0	0	0	0	0	0	0	0	0	0	0	0	0	0	0	0	0	0	0	0	0	0	0	1	0	0	0	0	0	0	0	0
MLLT4	0	0	0	0	0	0	0	0	0	0	0	0	1	0	0	0	0	0	0	0	0	0	0	0	0	0	0	0	0	0	0	0	0	0	0	0	0	0	0	0	0	0	0	0	0	0	0	0	0
MPP6	0	0	0	0	0	0	0	0	0	0	0	0	1	1	0	0	0	0	0	0	0	0	0	0	0	0	0	0	0	0	0	0	0	0	0	0	0	0	0	0	0	0	0	0	0	0	0	0	0
NAPG	0	0	0	0	0	0	0	0	0	0	0	0	1	2	1	0	0	0	0	0	0	0	0	0	0	0	0	0	0	0	0	0	0	0	0	0	0	0	0	0	0	0	0	0	0	0	0	0	0
NCK1	0	0	0	0	0	0	0	0	0	0	0	0	2	0	0	0	0	0	0	0	0	0	0	0	0	0	0	0	0	0	0	0	0	0	0	0	0	0	0	0	0	0	0	0	0	0	0	0	0
NOTCH1	0	0	0	0	0	0	0	0	0	0	0	0	2	0	0	0	0	0	0	0	0	0	0	0	0	0	0	0	0	0	0	0	0	0	0	0	0	0	0	0	0	0	0	0	0	0	0	0	0
NPHP4	0	0	0	0	0	0	0	0	0	0	0	0	1	0	0	0	0	0	0	0	0	0	0	0	0	0	0	0	0	0	0	0	0	0	0	0	0	0	0	0	0	0	0	0	0	0	0	0	0
NPTN	0	0	0	0	0	0	0	0	0	0	0	0	1	1	1	0	1	0	0	0	1	0	0	0	0	0	0	0	0	0	0	0	0	0	0	0	0	0	1	0	0	0	0	0	0	0	0	0	0
OSTF1	0	0	0	0	0	0	0	0	0	0	0	0	1	1	0	0	0	0	0	0	0	0	0	0	0	0	0	0	0	0	0	0	0	0	0	0	0	0	0	0	0	0	0	0	0	0	0	0	0
PAG1	0	0	0	0	0	0	0	0	0	0	0	0	1	1	0	0	0	0	0	0	0	0	0	0	0	0	0	0	0	0	0	0	0	0	0	0	0	0	0	0	0	0	0	0	0	0	0	0	0
PALM	0	0	0	0	0	0	0	0	0	0	0	0	1	1	0	0	0	0	0	0	0	0	0	0	0	0	0	0	0	0	0	0	0	0	0	0	0	0	0	0	0	0	0	0	0	0	0	0	0
PCDH7	0	0	0	0	0	0	0	0	0	0	0	0	1	0	0	0	0	0	0	1	0	0	1	0	0	0	0	0	0	0	0	0	1	0	0	0	0	0	1	0	0	1	0	1	1	0	0	0	1
PDLIM7	0	0	0	0	0	0	0	0	0	0	0	0	1	0	0	0	0	0	0	0	0	0	0	0	0	0	0	0	0	0	0	0	0	0	0	0	0	0	0	0	1	0	0	0	0	0	0	0	0
PFDN2	0	0	0	0	0	0	0	0	0	0	0	0	1	0	1	0	0	0	0	0	0	0	0	0	0	0	0	0	0	0	0	0	0	0	0	0	0	0	0	0	2	2	1	1	0	0	0	0	0
PIK3R2	0	0	0	0	0	0	0	0	0	0	0	0	1	1	0	0	0	0	0	0	0	0	0	0	0	0	0	0	0	0	0	0	0	0	0	0	0	0	0	0	0	0	0	0	0	0	0	0	0
PIN1	0	0	0	0	0	0	0	0	0	0	0	0	1	0	0	0	0	0	0	0	0	0	0	0	0	0	0	0	1	1	0	0	0	0	0	0	0	0	0	0	2	0	1	0	0	0	0	0	0
PIP5K1A	0	0	0	0	0	0	0	0	0	0	0	0	3	3	3	0	0	0	0	0	0	0	0	0	0	0	0	0	0	0	0	0	0	0	1	0	0	0	0	0	0	0	0	0	0	0	0	0	0
PLA2G7	0	0	0	0	0	0	0	0	0	0	0	0	1	0	0	0	0	0	0	0	0	0	0	0	0	0	0	0	0	0	0	0	1	0	0	0	0	0	0	0	0	0	0	0	0	0	0	0	0
PLK1	0	0	0	0	0	0	0	0	0	0	0	0	1	0	0	0	0	0	0	0	0	0	0	0	0	0	0	0	0	2	1	0	0	1	0	0	0	0	0	11	20	12	10	9	4	0	0	0	0
PLPP3	0	0	0	0	0	0	0	0	0	0	0	0	1	0	0	0	0	0	0	0	0	0	0	0	0	0	0	0	0	0	0	0	0	0	0	0	0	0	0	0	0	0	0	0	0	0	0	0	0
PLXNA1	0	0	0	0	0	0	0	0	0	0	0	0	1	0	2	0	0	0	0	2	0	0	0	1	0	0	0	0	0	0	0	0	1	0	0	0	0	0	0	0	0	0	0	0	0	0	0	0	0
RBM3	0	0	0	0	0	0	0	0	0	0	0	0	1	0	0	0	0	0	0	0	0	0	0	0	0	0	0	0	0	0	0	0	0	0	0	0	0	0	0	0	0	0	0	0	0	0	0	0	0
RBMX	0	0	0	0	0	0	0	0	0	0	0	0	1	1	0	0	0	0	0	0	0	0	0	0	0	0	0	0	0	0	0	0	0	0	0	0	0	0	0	0	0	0	0	0	0	0	0	0	0
RHOB	0	0	0	0	0	0	0	0	0	0	0	0	1	1	1	0	0	0	0	0	1	0	0	0	0	0	0	0	0	0	0	0	0	1	0	1	0	0	0	0	0	1	0	0	0	0	0	0	0
RNF149	0	0	0	0	0	0	0	0	0	0	0	0	1	1	0	0	0	0	0	0	0	0	0	0	0	0	0	0	0	0	0	0	0	0	0	0	0	0	0	0	0	0	0	0	0	0	0	0	0
ROBO1	0	0	0	0	0	0	0	0	0	0	0	0	1	0	0	0	0	0	0	1	1	0	0	0	0	0	0	0	0	0	0	0	0	0	0	0	0	0	0	0	1	0	0	0	0	0	0	0	0
RPL35	0	0	0	0	0	0	0	0	0	0	0	0	1	1	1	0	0	0	0	0	0	0	0	0	0	0	0	1	0	0	0	0	0	1	0	1	0	0	0	0	0	0	0	0	0	0	0	0	1
RPS27A	0	0	0	0	0	0	0	0	0	0	0	0	14	0	0	0	0	0	0	0	0	0	0	0	0	0	0	0	0	0	0	0	0	0	0	0	0	0	0	0	0	0	0	0	0	0	0	0	0
RRP12	0	0	0	0	0	0	0	0	0	0	0	0	1	0	0	0	0	0	0	0	0	0	0	0	0	0	0	0	0	0	0	0	0	0	0	0	0	0	0	0	0	0	0	0	0	0	0	0	0
RTN4RL2	0	0	0	0	0	0	0	0	0	0	0	0	1	0	1	0	0	0	0	0	0	0	0	0	0	0	0	0	0	0	0	0	0	0	0	0	0	0	0	0	1	0	0	0	0	0	0	1	0
SDC1	0	0	0	0	0	0	0	0	0	0	0	0	1	0	1	0	0	0	0	0	0	0	0	0	0	0	0	0	0	0	0	0	0	0	0	0	0	0	0	0	0	0	0	0	0	0	0	0	0
SGTA	0	0	0	0	0	0	0	0	0	0	0	0	1	1	1	0	0	0	0	0	0	0	0	0	0	0	0	0	0	0	0	0	0	0	0	0	0	0	0	0	1	1	0	0	0	0	0	0	0
SH3GL3	0	0	0	0	0	0	0	0	0	0	0	0	3	0	1	0	0	0	0	0	0	0	0	0	0	0	0	0	1	0	0	0	1	0	0	0	0	0	0	0	0	0	0	0	0	0	0	1	0
SLC16A2	0	0	0	0	0	0	0	0	0	0	0	0	1	0	0	0	0	0	0	0	0	0	0	0	0	0	0	0	0	0	0	0	0	0	0	0	0	0	0	0	0	0	0	0	0	0	0	0	0
SLC38A3	0	0	0	0	0	0	0	0	0	0	0	0	2	0	0	0	0	0	0	2	2	0	0	0	0	0	0	0	0	0	0	0	1	1	0	0	0	2	0	0	0	0	0	0	0	0	0	0	0
SLC6A6	0	0	0	0	0	0	0	0	0	0	0	0	1	1	1	0	0	0	1	0	1	1	0	0	0	0	1	0	0	0	1	0	1	1	0	0	0	0	1	0	0	0	0	0	0	0	0	0	0
SLC7A2	0	0	0	0	0	0	0	0	0	0	0	0	2	1	1	0	0	0	1	2	2	2	0	1	0	0	0	0	0	0	0	0	1	0	3	0	1	1	1	0	0	0	0	0	0	0	0	0	0
SMAD5	0	0	0	0	0	0	0	0	0	0	0	0	2	0	0	0	0	0	0	0	0	0	0	0	0	0	0	0	0	0	0	0	0	0	0	0	0	0	0	0	0	0	0	0	0	0	0	0	0
SNX18	0	0	0	0	0	0	0	0	0	0	0	0	4	3	1	0	0	0	1	0	0	0	0	0	0	0	0	0	0	0	0	0	0	0	0	0	0	0	0	0	2	0	0	0	0	0	0	0	0
SRP72	0	0	0	0	0	0	0	0	0	0	0	0	1	1	1	0	0	0	0	0	0	1	1	0	0	0	0	0	0	1	0	0	0	1	0	0	0	0	0	0	0	0	0	0	0	0	0	0	0
SRP9	0	0	0	0	0	0	0	0	0	0	0	0	1	0	0	0	1	0	0	0	0	0	0	0	0	0	0	0	0	1	0	0	0	0	1	0	0	0	0	0	1	0	0	0	0	0	0	0	0
SSTR2	0	0	0	0	0	0	0	0	0	0	0	0	1	0	0	0	0	0	0	0	0	1	0	0	0	0	1	0	0	0	0	0	0	1	1	1	0	1	0	0	1	0	0	0	0	0	0	0	0
STK26	0	0	0	0	0	0	0	0	0	0	0	0	2	0	1	0	0	0	0	0	0	0	0	0	0	0	0	0	0	0	0	0	0	0	0	0	0	0	0	0	0	1	0	0	0	0	0	0	0
STX3	0	0	0	0	0	0	0	0	0	0	0	0	1	1	2	0	0	0	0	0	0	0	0	0	0	0	0	0	0	0	0	0	0	0	0	0	0	0	0	0	0	0	0	0	0	0	0	0	0
STX8	0	0	0	0	0	0	0	0	0	0	0	0	1	0	1	0	0	0	0	0	0	0	0	0	0	0	0	0	0	0	0	0	0	0	0	0	0	0	0	0	0	0	0	0	0	0	0	0	0
SUMO2	0	0	0	0	0	0	0	0	0	0	0	0	1	0	0	0	0	0	0	0	0	0	0	0	0	0	0	0	0	0	0	0	0	0	0	0	0	0	0	0	2	0	0	0	0	0	0	0	0
TMEM100	0	0	0	0	0	0	0	0	0	0	0	0	1	0	0	0	0	0	0	0	0	0	0	0	0	0	0	0	0	0	0	0	0	0	0	0	0	0	0	0	0	0	0	0	0	0	0	0	0
TMEM106B	0	0	0	0	0	0	0	0	0	0	0	0	1	0	1	0	0	0	0	0	0	0	0	0	0	0	0	0	0	0	0	0	0	0	0	0	0	0	0	0	0	0	0	0	0	0	0	0	0
TMEM237	0	0	0	0	0	0	0	0	0	0	0	0	2	0	0	0	0	0	0	0	0	0	0	0	0	0	0	0	0	0	0	0	0	0	0	0	0	0	0	0	0	0	0	0	0	0	0	0	0
TULP3	0	0	0	0	0	0	0	0	0	0	0	0	1	0	1	0	0	0	0	0	0	0	0	0	0	0	0	0	0	0	0	0	0	0	0	0	0	0	0	0	0	0	0	0	0	0	0	0	0
UBL3	0	0	0	0	0	0	0	0	0	0	0	0	1	0	0	0	0	0	0	0	0	0	0	0	0	0	0	0	0	0	0	0	0	0	0	0	0	0	0	0	0	0	0	0	0	0	0	0	0
UBTD1	0	0	0	0	0	0	0	0	0	0	0	0	6	0	0	0	0	0	0	0	0	0	0	0	0	0	0	0	0	0	0	0	0	0	0	0	0	0	1	0	0	0	0	0	0	0	0	0	0
ULBP2	0	0	0	0	0	0	0	0	0	0	0	0	1	1	1	0	0	0	0	0	0	0	1	0	0	0	0	0	0	1	0	0	2	0	0	0	0	0	1	0	2	2	0	0	0	0	0	1	1
UPF3B	0	0	0	0	0	0	0	0	0	0	0	0	1	0	0	0	0	0	0	0	0	0	0	0	0	0	0	0	0	0	0	0	0	0	0	0	0	0	0	0	0	0	0	0	0	0	0	0	0
USP6NL	0	0	0	0	0	0	0	0	0	0	0	0	2	0	0	0	0	0	0	0	0	0	0	0	0	0	0	0	0	0	0	0	0	0	0	0	0	0	0	0	0	0	0	0	0	0	0	0	0
VANGL1	0	0	0	0	0	0	0	0	0	0	0	0	1	0	1	0	0	0	0	1	1	0	0	0	0	0	0	0	0	0	0	0	0	0	0	0	0	0	0	0	0	0	0	0	0	0	0	0	0
YIPF2	0	0	0	0	0	0	0	0	0	0	0	0	1	0	0	0	0	0	0	0	0	0	0	0	0	0	0	0	0	0	0	0	0	0	0	0	0	0	0	0	0	0	0	0	0	1	0	0	0
ACTC1	0	0	0	0	0	0	0	0	0	0	0	0	0	11	0	0	0	0	0	0	0	0	0	0	0	0	0	0	0	0	0	0	0	0	0	0	0	0	0	0	0	0	0	0	0	0	0	0	0
CASK	0	0	0	0	0	0	0	0	0	0	0	0	0	1	0	0	0	0	0	0	0	0	0	0	0	0	0	0	0	0	0	0	0	0	0	0	0	0	0	0	0	0	0	0	0	0	0	0	0
CCP110	0	0	0	0	0	0	0	0	0	0	0	0	0	1	0	0	0	0	0	0	0	0	0	0	0	0	0	0	0	0	0	0	0	0	0	0	0	0	0	0	0	0	0	0	0	0	0	0	0
CDKN2A	0	0	0	0	0	0	0	0	0	0	0	0	0	1	0	0	0	0	0	0	0	0	0	1	0	0	0	0	0	0	1	0	1	0	0	0	0	0	0	0	3	1	1	0	0	2	0	1	2
DDTL	0	0	0	0	0	0	0	0	0	0	0	0	0	1	0	0	0	0	0	0	0	0	0	0	0	0	0	0	0	0	0	0	0	0	0	0	0	0	0	0	0	0	0	0	0	0	0	0	0
EFR3A	0	0	0	0	0	0	0	0	0	0	0	0	0	2	0	0	0	0	0	0	0	0	0	0	0	0	0	0	0	0	0	0	0	0	0	0	0	0	0	0	0	0	0	0	0	0	0	0	0
EMB	0	0	0	0	0	0	0	0	0	0	0	0	0	1	1	0	0	0	0	1	1	0	0	0	0	0	0	0	0	0	0	0	0	0	0	0	0	0	0	0	0	1	0	0	0	0	0	0	0
EPHA3	0	0	0	0	0	0	0	0	0	0	0	0	0	1	0	0	0	0	0	0	0	0	0	0	0	0	0	0	0	0	0	0	0	0	0	0	0	0	0	0	0	0	0	0	0	0	0	0	0
ERBB2IP	0	0	0	0	0	0	0	0	0	0	0	0	0	1	2	0	0	0	0	0	0	0	0	0	0	0	0	0	0	0	0	0	0	0	0	0	0	0	0	0	0	0	0	0	0	0	0	0	0
FAM3C	0	0	0	0	0	0	0	0	0	0	0	0	0	1	0	0	0	0	0	0	0	0	0	0	0	0	0	0	0	0	0	0	0	1	0	0	0	0	0	0	0	0	0	0	0	0	0	0	0
FMNL3	0	0	0	0	0	0	0	0	0	0	0	0	0	1	0	0	0	0	0	0	0	0	0	0	0	0	0	0	0	0	0	0	1	0	0	0	0	0	0	0	0	0	0	0	0	0	0	0	0
FTSJ1	0	0	0	0	0	0	0	0	0	0	0	0	0	2	1	0	1	0	0	0	0	0	0	1	0	0	0	0	0	0	0	0	0	0	0	0	0	0	0	0	0	0	0	0	0	0	0	0	1
GAB1	0	0	0	0	0	0	0	0	0	0	0	0	0	1	0	0	0	0	0	0	0	0	0	0	0	0	0	0	0	0	0	0	0	0	0	0	0	0	0	0	0	0	0	0	0	0	0	0	0
GRAP2	0	0	0	0	0	0	0	0	0	0	0	0	0	58	0	0	0	0	0	0	0	0	0	0	0	0	0	0	0	0	0	0	0	0	0	0	0	0	0	0	0	0	0	0	0	0	0	0	0
HEBP2	0	0	0	0	0	0	0	0	0	0	0	0	0	1	1	0	0	0	0	0	0	0	0	0	0	0	0	0	0	0	0	0	0	0	0	0	0	0	0	0	0	0	0	0	0	0	0	0	0
KCTD10	0	0	0	0	0	0	0	0	0	0	0	0	0	1	0	0	0	0	0	0	0	0	0	0	0	0	0	0	0	0	0	0	0	0	0	0	0	0	0	0	0	0	0	0	0	0	0	0	0
KRT6B	0	0	0	0	0	0	0	0	0	0	0	0	0	1	0	0	0	0	0	0	0	0	0	0	0	0	0	0	0	0	0	0	0	0	0	0	0	0	4	0	4	0	0	17	3	0	0	0	0
LHFPL2	0	0	0	0	0	0	0	0	0	0	0	0	0	1	1	0	0	0	0	0	0	0	0	0	0	0	0	0	0	0	0	0	0	0	0	0	0	0	0	0	1	0	0	0	0	0	0	0	0
LUC7L2	0	0	0	0	0	0	0	0	0	0	0	0	0	1	1	0	1	0	0	0	0	0	0	0	0	0	0	0	0	0	0	0	0	0	0	0	0	0	0	0	0	0	0	0	0	0	0	0	0
MARCH7	0	0	0	0	0	0	0	0	0	0	0	0	0	3	0	0	0	0	0	0	0	0	0	0	0	0	0	0	0	0	0	0	0	0	0	0	0	0	0	0	0	0	0	0	0	0	0	0	0
NAA16	0	0	0	0	0	0	0	0	0	0	0	0	0	1	0	0	0	0	0	0	0	0	1	0	0	0	0	0	0	0	0	0	0	0	1	0	0	0	0	0	0	0	0	0	0	0	0	0	0
NME2	0	0	0	0	0	0	0	0	0	0	0	0	0	2	0	0	0	0	0	0	0	0	0	0	0	0	0	0	0	0	0	0	0	0	0	0	0	0	0	0	0	0	0	0	0	0	0	0	0
NRP2	0	0	0	0	0	0	0	0	0	0	0	0	0	1	2	0	0	0	0	0	0	0	2	1	0	0	0	0	1	0	0	0	0	0	0	0	0	0	0	0	1	0	0	0	0	0	0	0	0
NSFL1C	0	0	0	0	0	0	0	0	0	0	0	0	0	1	2	0	0	0	0	0	0	2	3	7	0	0	1	0	0	0	0	0	0	0	0	0	0	0	0	0	0	0	0	0	0	2	0	5	4
PIK3R1	0	0	0	0	0	0	0	0	0	0	0	0	0	2	0	0	0	0	0	0	0	0	0	0	0	0	0	0	0	0	0	0	0	0	0	0	0	0	0	0	0	0	0	0	0	0	0	0	0
PSEN1	0	0	0	0	0	0	0	0	0	0	0	0	0	1	0	0	0	0	1	0	1	1	1	1	0	0	0	0	0	0	1	0	1	1	0	0	0	0	1	0	1	2	0	0	0	0	0	0	1
PTPN23	0	0	0	0	0	0	0	0	0	0	0	0	0	5	0	0	0	0	0	0	0	0	0	0	0	0	0	0	0	0	0	0	0	0	0	0	0	0	0	0	0	0	0	0	0	0	0	0	0
RPL32	0	0	0	0	0	0	0	0	0	0	0	0	0	1	0	0	0	0	0	0	0	0	0	0	0	0	0	0	0	0	0	0	0	0	0	0	0	0	0	0	1	0	0	0	0	0	0	0	0
RPL38	0	0	0	0	0	0	0	0	0	0	0	0	0	1	0	0	0	0	0	0	0	0	0	0	0	0	0	0	0	0	0	0	0	0	0	0	0	0	0	0	0	0	0	0	0	0	0	0	0
SHCBP1	0	0	0	0	0	0	0	0	0	0	0	0	0	1	0	0	0	0	0	0	0	0	0	0	0	0	0	0	0	0	0	0	0	0	0	0	0	0	0	0	0	0	0	0	0	0	0	0	0
SLC30A1	0	0	0	0	0	0	0	0	0	0	0	0	0	1	1	0	0	0	0	0	0	0	0	0	0	0	0	0	0	0	0	0	0	0	0	0	0	0	0	0	0	0	0	0	0	0	0	0	0
STAMBP	0	0	0	0	0	0	0	0	0	0	0	0	0	14	0	0	0	0	0	0	1	3	3	2	0	0	0	0	0	0	1	0	0	0	0	0	0	0	0	1	2	3	1	0	0	1	0	2	2
STX10	0	0	0	0	0	0	0	0	0	0	0	0	0	1	0	0	0	0	0	0	0	0	0	0	0	0	0	0	0	0	0	0	0	0	0	0	0	0	0	0	0	0	0	0	0	0	0	0	0
SUGT1	0	0	0	0	0	0	0	0	0	0	0	0	0	1	0	0	0	0	0	0	0	0	0	0	0	0	0	0	0	0	0	0	0	0	0	0	0	0	0	0	0	0	0	0	0	0	0	0	0
TMEM30B	0	0	0	0	0	0	0	0	0	0	0	0	0	1	0	0	0	0	0	0	0	0	0	0	0	0	0	0	0	0	0	0	0	0	0	0	0	0	0	0	0	0	0	0	0	0	0	0	0
UCHL1	0	0	0	0	0	0	0	0	0	0	0	0	0	2	0	0	0	0	0	0	0	0	0	0	0	0	0	0	0	0	0	0	0	0	0	0	0	0	0	0	0	0	0	0	0	0	0	0	0
USP8	0	0	0	0	0	0	0	0	0	0	0	0	0	7	0	0	0	0	0	0	0	0	0	0	0	0	0	0	0	0	0	0	0	0	0	0	0	0	0	0	0	0	0	0	0	0	0	0	0
WDR48	0	0	0	0	0	0	0	0	0	0	0	0	0	1	0	0	0	0	0	0	0	0	0	0	0	0	0	0	0	0	0	0	0	0	0	0	0	0	0	0	0	0	0	0	0	0	0	0	0
AMER1	0	0	0	0	0	0	0	0	0	0	0	0	0	0	2	0	0	0	0	0	0	0	0	0	0	0	0	0	0	0	0	0	0	0	0	0	0	0	0	0	0	0	0	0	0	0	0	0	0
APOH	0	0	0	0	0	0	0	0	0	0	0	0	0	0	1	0	0	0	0	0	1	0	0	0	0	1	0	0	0	0	0	1	0	0	0	0	0	0	0	0	0	0	0	0	0	0	0	1	0
ATXN3	0	0	0	0	0	0	0	0	0	0	0	0	0	0	1	0	0	0	0	0	0	0	0	0	0	0	0	0	0	0	0	0	0	0	0	0	0	0	0	0	0	0	0	0	0	0	0	1	1
BASP1	0	0	0	0	0	0	0	0	0	0	0	0	0	0	2	0	0	0	0	0	0	0	0	0	0	0	0	0	0	0	0	0	0	0	0	0	0	0	0	0	0	0	0	0	0	0	0	0	0
BCAM	0	0	0	0	0	0	0	0	0	0	0	0	0	0	2	0	0	0	0	0	0	0	0	0	0	0	0	0	0	0	0	0	0	0	0	0	0	0	0	0	0	1	0	0	0	0	0	0	0
CCNA2	0	0	0	0	0	0	0	0	0	0	0	0	0	0	3	0	0	0	0	0	0	0	0	0	0	0	0	0	0	0	0	0	0	0	0	0	0	0	0	0	0	0	0	0	0	0	0	0	0
CCNB2	0	0	0	0	0	0	0	0	0	0	0	0	0	0	2	0	0	0	0	0	0	0	0	0	0	0	0	0	0	0	0	0	0	0	0	0	0	0	0	0	3	3	2	1	1	0	0	0	0
CKS1B	0	0	0	0	0	0	0	0	0	0	0	0	0	0	22	0	0	0	0	0	0	0	0	0	0	0	0	0	0	0	0	0	0	0	0	0	0	0	0	0	0	1	0	0	0	0	0	0	0
CSNK1G2	0	0	0	0	0	0	0	0	0	0	0	0	0	0	2	0	1	0	1	0	0	0	0	0	0	0	1	0	0	0	1	0	1	0	0	0	1	1	0	1	0	0	0	0	0	0	0	0	0
DDI2	0	0	0	0	0	0	0	0	0	0	0	0	0	0	7	0	0	0	0	0	0	0	0	1	0	0	0	0	0	0	0	0	1	0	0	0	0	0	0	0	1	0	0	0	0	1	0	2	1
DDT	0	0	0	0	0	0	0	0	0	0	0	0	0	0	1	0	0	0	0	0	0	0	0	0	0	0	0	0	0	0	0	0	0	0	0	0	0	0	0	0	0	0	0	0	0	0	0	0	0
DDX50	0	0	0	0	0	0	0	0	0	0	0	0	0	0	1	0	1	0	0	0	0	0	0	0	0	0	0	0	1	0	1	0	0	0	0	0	0	0	1	0	0	0	0	0	1	0	0	0	0
DLG3	0	0	0	0	0	0	0	0	0	0	0	0	0	0	1	0	0	0	0	0	0	0	0	0	0	0	0	0	0	0	0	0	0	0	0	0	0	0	0	0	0	0	0	0	0	0	0	0	0
DNAJB2	0	0	0	0	0	0	0	0	0	0	0	0	0	0	1	0	0	0	0	0	0	0	1	1	0	0	0	0	0	0	0	0	0	0	0	0	0	0	0	0	1	1	0	0	0	0	0	0	0
EHD2	0	0	0	0	0	0	0	0	0	0	0	0	0	0	1	0	0	0	0	0	0	0	0	0	0	0	0	0	0	0	0	0	0	0	0	0	0	0	0	0	0	0	0	0	0	0	0	0	0
ERICH5	0	0	0	0	0	0	0	0	0	0	0	0	0	0	1	0	0	0	0	0	0	0	0	0	0	0	0	0	0	0	0	0	0	0	0	0	0	0	0	0	0	0	0	0	0	0	0	0	0
GGA3	0	0	0	0	0	0	0	0	0	0	0	0	0	0	1	0	0	0	0	0	0	0	0	0	0	0	0	0	0	0	0	0	0	0	0	0	0	0	0	0	0	0	0	0	0	0	0	0	0
GLTP	0	0	0	0	0	0	0	0	0	0	0	0	0	0	1	0	0	0	0	0	0	0	0	0	0	0	0	0	0	0	0	0	0	0	0	0	0	0	0	0	0	0	0	0	0	0	0	0	0
GNAI1	0	0	0	0	0	0	0	0	0	0	0	0	0	0	1	0	0	0	0	0	0	0	0	0	0	0	0	0	0	0	0	0	1	0	0	0	0	0	0	0	0	1	0	0	0	0	0	0	0
GNG7	0	0	0	0	0	0	0	0	0	0	0	0	0	0	1	0	0	0	0	0	0	0	0	0	0	0	0	0	0	0	0	0	0	0	0	0	0	0	0	0	0	0	0	0	0	0	0	0	0
GPC1	0	0	0	0	0	0	0	0	0	0	0	0	0	0	1	0	0	0	0	0	0	0	0	0	0	0	0	0	0	0	0	0	0	0	0	0	0	0	0	0	0	0	0	0	0	0	0	0	0
GPRIN1	0	0	0	0	0	0	0	0	0	0	0	0	0	0	1	0	0	0	0	0	0	0	0	0	0	0	0	0	0	0	0	0	0	0	0	0	0	0	0	0	0	0	0	0	0	0	0	0	0
HEBP1	0	0	0	0	0	0	0	0	0	0	0	0	0	0	1	0	0	0	0	0	0	0	0	0	0	0	0	0	0	0	0	0	0	0	0	0	0	0	0	0	1	1	0	0	0	0	0	0	0
KHSRP	0	0	0	0	0	0	0	0	0	0	0	0	0	0	1	0	0	0	0	0	0	0	0	0	0	0	0	0	0	0	0	0	0	0	0	0	0	0	0	0	0	0	0	0	0	0	0	0	0
LCN1	0	0	0	0	0	0	0	0	0	0	0	0	0	0	1	0	0	0	0	0	0	0	0	0	0	0	0	0	0	0	0	0	0	0	0	0	0	0	1	0	0	0	0	1	1	0	0	0	0
MKRN1	0	0	0	0	0	0	0	0	0	0	0	0	0	0	3	0	0	0	0	0	0	0	0	0	0	0	0	0	0	0	0	0	0	0	0	0	0	0	0	0	0	0	0	0	0	0	0	0	0
NPLOC4	0	0	0	0	0	0	0	0	0	0	0	0	0	0	1	0	0	0	0	0	0	0	2	1	0	0	1	0	0	0	0	0	0	0	0	0	0	0	0	0	2	1	0	0	0	1	0	1	0
NUMB	0	0	0	0	0	0	0	0	0	0	0	0	0	0	1	0	0	0	0	0	0	0	0	0	0	0	0	0	0	0	0	0	0	0	0	0	0	0	0	0	0	0	0	0	0	0	0	0	0
PITPNB	0	0	0	0	0	0	0	0	0	0	0	0	0	0	1	0	0	0	0	0	0	0	1	1	0	0	0	0	0	0	0	0	0	0	0	0	0	0	0	0	0	1	0	0	0	0	0	0	0
PLSCR3	0	0	0	0	0	0	0	0	0	0	0	0	0	0	1	0	0	0	0	0	0	0	0	0	0	0	0	0	0	0	0	0	0	0	0	0	0	0	0	0	0	0	0	0	0	0	0	0	0
PPIB	0	0	0	0	0	0	0	0	0	0	0	0	0	0	1	0	0	0	0	0	0	0	0	0	0	0	0	0	0	0	0	0	0	0	0	0	0	0	0	0	0	0	0	0	0	0	0	0	0
PSMA4	0	0	0	0	0	0	0	0	0	0	0	0	0	0	1	0	0	0	0	0	0	0	0	1	1	1	1	0	0	0	0	0	0	0	0	0	0	0	2	1	3	1	1	0	0	1	2	2	1
PSMB2	0	0	0	0	0	0	0	0	0	0	0	0	0	0	5	0	0	0	0	0	0	2	1	3	0	0	3	0	0	0	0	0	1	0	0	0	0	0	1	0	3	2	0	0	1	2	3	6	5
PSMB4	0	0	0	0	0	0	0	0	0	0	0	0	0	0	2	0	0	0	0	0	0	0	2	1	0	0	0	0	0	0	0	0	1	0	0	0	0	0	1	0	2	1	1	1	1	2	1	1	2
PSMB7	0	0	0	0	0	0	0	0	0	0	0	0	0	0	3	0	0	0	0	0	0	1	1	1	0	0	2	0	0	0	0	0	1	0	0	0	0	0	0	0	0	1	0	0	0	1	1	1	1
PSMG1	0	0	0	0	0	0	0	0	0	0	0	0	0	0	1	0	0	0	0	0	0	0	0	0	0	0	0	0	0	0	0	0	0	0	0	0	0	0	0	0	0	1	0	0	0	0	0	0	0
SETSIP	0	0	0	0	0	0	0	0	0	0	0	0	0	0	1	0	0	0	0	0	0	0	0	0	0	0	0	0	0	0	0	0	0	0	0	0	0	0	0	0	0	0	0	0	0	0	0	0	0
SGMS2	0	0	0	0	0	0	0	0	0	0	0	0	0	0	1	0	0	0	0	0	0	0	0	0	0	0	0	0	0	0	0	0	0	0	0	0	0	0	0	0	0	0	0	0	0	0	0	0	0
SLC12A7	0	0	0	0	0	0	0	0	0	0	0	0	0	0	1	0	0	0	0	0	0	0	0	0	0	0	0	0	0	0	0	0	0	0	0	0	0	0	0	0	0	0	0	0	0	0	0	0	0
SLC47A1	0	0	0	0	0	0	0	0	0	0	0	0	0	0	1	0	0	0	0	0	0	0	0	0	0	0	0	0	0	0	0	0	0	0	0	0	0	0	1	0	0	0	0	0	0	0	0	0	0
SNX27	0	0	0	0	0	0	0	0	0	0	0	0	0	0	1	0	0	0	0	0	0	0	0	0	0	0	0	0	0	0	0	0	0	0	0	0	0	0	0	0	0	0	0	0	0	0	0	0	0
TBCA	0	0	0	0	0	0	0	0	0	0	0	0	0	0	1	0	0	0	0	0	0	0	0	0	0	0	0	0	0	0	0	0	0	0	0	0	0	0	0	0	0	0	0	0	0	0	0	0	0
TXNL1	0	0	0	0	0	0	0	0	0	0	0	0	0	0	1	0	0	0	0	0	0	0	2	0	0	0	0	0	0	1	0	0	0	0	0	0	0	0	0	0	1	1	1	0	0	1	0	4	3
UBE3A	0	0	0	0	0	0	0	0	0	0	0	0	0	0	1	0	0	0	0	0	0	0	0	0	0	0	0	0	0	0	0	0	0	0	0	0	0	0	0	0	0	0	0	0	0	0	0	3	1
UCHL5	0	0	0	0	0	0	0	0	0	0	0	0	0	0	1	0	0	0	0	0	0	1	0	1	0	0	0	0	0	0	0	0	0	0	0	0	0	0	0	0	0	0	0	0	1	3	3	7	4
UFD1L	0	0	0	0	0	0	0	0	0	0	0	0	0	0	2	0	0	0	0	0	0	0	0	0	0	0	0	0	0	0	0	0	0	0	0	0	0	0	0	0	0	0	0	0	0	0	0	0	0
VANGL2	0	0	0	0	0	0	0	0	0	0	0	0	0	0	1	0	0	0	0	0	0	0	0	0	0	0	0	0	0	0	0	0	0	0	0	0	0	0	0	0	0	0	0	0	0	0	0	0	0
ZDHHC20	0	0	0	0	0	0	0	0	0	0	0	0	0	0	1	0	0	0	0	0	0	0	0	0	0	0	0	0	0	0	0	0	0	0	0	0	0	0	0	0	0	0	0	0	0	0	0	0	0
C3orf58	0	0	0	0	0	0	0	0	0	0	0	0	0	0	0	1	0	1	0	0	0	0	0	1	0	0	0	0	0	0	0	0	0	0	0	0	0	0	0	0	0	0	0	0	0	0	0	0	0
CPN1	0	0	0	0	0	0	0	0	0	0	0	0	0	0	0	1	0	0	0	0	1	0	0	0	0	0	0	0	0	0	0	0	0	0	0	0	0	0	0	0	0	0	0	0	0	0	0	0	0
EIF3K	0	0	0	0	0	0	0	0	0	0	0	0	0	0	0	1	0	0	0	0	0	0	0	0	0	0	0	0	0	0	0	0	0	0	0	0	0	0	1	0	1	0	0	1	1	0	0	0	0
FAP	0	0	0	0	0	0	0	0	0	0	0	0	0	0	0	1	0	0	0	0	0	0	0	0	0	0	1	0	0	0	0	0	0	0	0	0	0	0	0	0	0	0	0	0	0	0	0	0	0
G3BP1	0	0	0	0	0	0	0	0	0	0	0	0	0	0	0	1	0	1	0	0	0	0	1	1	0	0	0	0	0	2	0	0	0	0	0	0	1	0	0	0	1	0	0	1	0	0	0	0	0
GDI1	0	0	0	0	0	0	0	0	0	0	0	0	0	0	0	1	0	0	0	0	0	0	0	0	0	0	0	0	0	0	0	0	0	0	0	0	0	0	0	0	0	4	0	0	0	0	0	0	0
H2AFZ	0	0	0	0	0	0	0	0	0	0	0	0	0	0	0	1	0	0	0	0	0	0	0	0	0	0	0	0	0	0	0	0	0	0	0	0	0	0	1	0	0	1	0	0	1	0	0	0	0
MTPN	0	0	0	0	0	0	0	0	0	0	0	0	0	0	0	1	0	0	0	0	0	0	1	0	0	0	0	1	0	0	0	0	0	0	0	0	0	0	0	0	0	0	0	0	0	0	0	0	0
PCSK5	0	0	0	0	0	0	0	0	0	0	0	0	0	0	0	1	1	0	0	0	0	2	0	6	0	0	0	0	1	1	0	0	0	0	0	0	0	0	1	0	1	0	0	1	2	0	0	0	0
PLOD1	0	0	0	0	0	0	0	0	0	0	0	0	0	0	0	1	0	0	0	0	0	1	1	0	0	0	0	0	0	0	0	0	0	0	0	0	0	0	0	0	0	0	0	1	0	0	0	0	0
PRPF4	0	0	0	0	0	0	0	0	0	0	0	0	0	0	0	1	0	0	0	0	0	1	0	2	0	0	0	0	1	0	0	0	0	0	0	0	1	0	0	1	0	0	0	1	0	0	0	0	0
RPL37A	0	0	0	0	0	0	0	0	0	0	0	0	0	0	0	1	0	0	0	0	0	0	0	0	0	0	0	0	0	0	0	0	0	0	0	0	0	0	0	0	0	0	0	0	1	0	0	0	0
SNU13	0	0	0	0	0	0	0	0	0	0	0	0	0	0	0	1	0	0	0	0	0	0	0	1	0	0	0	1	0	0	0	0	0	0	0	0	1	0	0	0	0	0	0	0	0	0	0	0	0
SON	0	0	0	0	0	0	0	0	0	0	0	0	0	0	0	1	0	0	0	0	0	0	0	0	0	0	0	0	0	0	0	0	0	0	0	0	0	0	0	0	0	0	0	0	0	0	0	0	0
STAT1	0	0	0	0	0	0	0	0	0	0	0	0	0	0	0	1	0	1	0	0	0	0	0	0	0	0	0	0	0	0	0	0	0	0	0	0	0	0	0	0	0	0	0	0	0	0	0	0	0
TNFAIP3	0	0	0	0	0	0	0	0	0	0	0	0	0	0	0	41	70	72	69	56	56	1	1	1	0	0	1	0	0	0	0	0	12	2	2	2	0	0	1	0	0	0	1	1	0	0	0	0	7
TNIP1	0	0	0	0	0	0	0	0	0	0	0	0	0	0	0	12	16	11	17	20	15	1	2	0	0	0	1	0	1	1	3	1	7	5	4	1	0	1	0	6	11	10	4	8	5	0	0	0	3
TNIP2	0	0	0	0	0	0	0	0	0	0	0	0	0	0	0	6	8	9	9	11	10	0	0	0	0	0	1	0	0	0	0	0	1	0	0	0	0	0	0	4	6	7	4	4	2	0	0	2	2
TSKU	0	0	0	0	0	0	0	0	0	0	0	0	0	0	0	1	0	0	0	0	0	0	0	0	0	0	0	0	0	0	0	0	0	0	0	0	0	0	0	0	0	0	0	1	0	0	0	0	0
TSTA3	0	0	0	0	0	0	0	0	0	0	0	0	0	0	0	1	0	0	0	0	0	0	0	0	0	0	0	0	0	0	0	0	0	0	0	0	0	0	0	0	0	0	0	0	0	0	0	0	0
USP54	0	0	0	0	0	0	0	0	0	0	0	0	0	0	0	1	0	0	0	0	0	0	0	0	0	0	0	0	3	1	1	0	4	0	0	0	0	0	0	0	0	0	0	0	0	0	2	3	6
ART4	0	0	0	0	0	0	0	0	0	0	0	0	0	0	0	0	2	2	0	0	0	0	0	0	0	0	0	0	0	0	0	0	0	0	0	0	0	0	0	0	0	0	0	0	0	0	0	0	0
AZI2	0	0	0	0	0	0	0	0	0	0	0	0	0	0	0	0	3	3	0	0	0	0	0	0	0	0	0	0	0	0	0	0	0	0	0	0	0	0	0	0	0	0	0	0	0	0	0	0	0
CALCOCO2	0	0	0	0	0	0	0	0	0	0	0	0	0	0	0	0	1	1	0	0	0	0	0	0	0	0	0	0	0	0	0	0	0	0	0	0	0	0	0	0	0	0	0	0	0	0	0	0	0
CCDC138	0	0	0	0	0	0	0	0	0	0	0	0	0	0	0	0	1	0	0	0	0	0	0	0	0	0	0	0	0	1	0	0	3	0	0	0	0	0	1	0	5	4	2	2	0	0	0	0	0
CSRP1	0	0	0	0	0	0	0	0	0	0	0	0	0	0	0	0	1	0	0	0	0	0	0	0	0	0	0	0	0	0	0	0	0	0	0	0	0	0	0	0	0	0	0	0	0	0	0	0	0
GOLGB1	0	0	0	0	0	0	0	0	0	0	0	0	0	0	0	0	1	0	0	0	0	0	0	0	0	0	0	0	0	0	0	0	0	0	0	0	0	0	0	0	0	0	0	0	0	0	0	0	0
HABP2	0	0	0	0	0	0	0	0	0	0	0	0	0	0	0	0	1	1	0	0	0	0	0	0	0	0	0	0	1	0	0	0	0	0	0	0	0	0	0	0	0	0	0	1	1	0	0	0	0
HAPLN1	0	0	0	0	0	0	0	0	0	0	0	0	0	0	0	0	1	0	0	0	0	0	0	0	0	0	0	0	0	0	0	0	0	0	0	0	0	0	0	0	0	0	0	0	0	0	0	0	0
IGHG2	0	0	0	0	0	0	0	0	0	0	0	0	0	0	0	0	1	0	0	0	0	0	0	0	0	0	0	0	0	0	0	0	0	0	0	0	0	0	0	0	1	0	0	0	0	0	0	0	0
KIF5C	0	0	0	0	0	0	0	0	0	0	0	0	0	0	0	0	1	2	0	0	0	0	0	0	0	0	0	0	0	0	0	0	1	0	0	0	0	0	1	0	0	2	1	1	1	0	0	0	0
MOXD1	0	0	0	0	0	0	0	0	0	0	0	0	0	0	0	0	1	0	0	0	0	0	0	0	0	0	0	1	0	0	0	0	1	0	0	0	0	0	0	0	2	4	0	1	0	1	0	3	2
MYH11	0	0	0	0	0	0	0	0	0	0	0	0	0	0	0	0	1	1	0	0	0	0	0	0	0	0	0	0	0	0	0	0	0	0	0	0	0	0	0	0	0	0	0	0	0	0	0	5	2
ORAI1	0	0	0	0	0	0	0	0	0	0	0	0	0	0	0	0	1	0	0	0	0	1	0	0	0	0	0	0	0	0	0	0	1	0	0	0	0	1	0	0	1	0	0	0	0	0	0	0	0
PAFAH1B3	0	0	0	0	0	0	0	0	0	0	0	0	0	0	0	0	1	0	0	0	0	0	0	0	0	0	0	1	0	0	0	0	0	0	0	0	0	0	0	0	0	0	0	0	0	0	0	0	0
PCSK6	0	0	0	0	0	0	0	0	0	0	0	0	0	0	0	0	1	0	0	0	0	0	0	0	0	0	0	0	1	0	0	0	0	0	0	0	0	0	1	0	0	0	0	0	0	0	0	0	0
PLEKHB2	0	0	0	0	0	0	0	0	0	0	0	0	0	0	0	0	1	2	1	2	2	0	0	0	0	0	1	0	0	0	0	0	2	0	0	0	0	0	0	0	1	1	0	1	0	0	0	1	2
PLTP	0	0	0	0	0	0	0	0	0	0	0	0	0	0	0	0	1	0	0	0	0	0	0	0	0	0	1	0	1	0	0	0	0	0	0	0	0	0	0	0	0	0	0	0	1	0	0	1	0
PREP	0	0	0	0	0	0	0	0	0	0	0	0	0	0	0	0	1	1	0	0	0	0	0	1	0	0	0	0	0	1	0	0	0	0	0	0	0	0	2	0	1	0	0	1	2	0	0	0	0
RAB9A	0	0	0	0	0	0	0	0	0	0	0	0	0	0	0	0	1	0	0	0	0	0	1	0	0	0	0	0	0	0	0	0	1	0	0	1	0	0	1	0	1	1	0	0	1	0	0	1	1
SDCBP2	0	0	0	0	0	0	0	0	0	0	0	0	0	0	0	0	1	0	0	0	0	0	0	0	0	0	0	0	1	0	0	0	1	0	0	0	0	0	0	0	1	2	0	0	0	0	0	1	0
SLC35C1	0	0	0	0	0	0	0	0	0	0	0	0	0	0	0	0	1	0	0	0	0	0	0	0	0	0	0	0	0	0	0	0	1	0	0	0	0	0	0	0	0	0	0	0	0	0	0	0	0
SLC5A6	0	0	0	0	0	0	0	0	0	0	0	0	0	0	0	0	1	0	0	0	0	0	0	0	0	0	0	0	0	0	0	0	1	0	0	0	1	0	0	0	0	1	0	0	0	0	0	0	0
SNX6	0	0	0	0	0	0	0	0	0	0	0	0	0	0	0	0	1	0	0	0	0	0	0	0	0	0	0	0	0	0	0	0	0	0	0	0	0	0	0	0	0	0	0	1	0	0	0	0	0
TAX1BP1	0	0	0	0	0	0	0	0	0	0	0	0	0	0	0	0	5	6	2	9	8	0	0	0	0	0	0	0	0	0	0	0	0	0	0	0	0	0	0	0	0	0	0	0	0	0	0	0	0
TBK1	0	0	0	0	0	0	0	0	0	0	0	0	0	0	0	0	3	4	3	7	6	0	0	0	0	0	0	0	1	3	1	1	9	0	0	0	0	0	0	14	26	25	21	19	17	1	1	4	5
THOC2	0	0	0	0	0	0	0	0	0	0	0	0	0	0	0	0	1	0	0	0	0	2	0	0	0	0	0	0	0	0	0	0	0	0	0	0	0	0	0	0	0	0	0	0	0	0	0	0	0
TRAF2	0	0	0	0	0	0	0	0	0	0	0	0	0	0	0	0	2	2	2	1	2	3	7	5	1	1	6	0	0	0	0	0	1	0	0	0	0	0	0	5	15	7	9	3	4	24	15	34	39
TRIP12	0	0	0	0	0	0	0	0	0	0	0	0	0	0	0	0	1	0	0	0	0	0	0	0	0	0	0	0	0	0	0	0	0	0	0	0	0	0	0	0	0	0	0	0	0	0	0	0	0
TTR	0	0	0	0	0	0	0	0	0	0	0	0	0	0	0	0	1	1	0	0	0	0	0	0	0	0	0	0	0	0	0	0	0	0	0	0	0	0	0	0	0	0	0	0	0	0	0	0	0
ZSWIM6	0	0	0	0	0	0	0	0	0	0	0	0	0	0	0	0	1	0	0	0	0	0	0	0	0	0	0	0	0	0	0	0	0	0	0	0	0	0	0	0	0	0	0	0	0	0	0	0	0
ACAT2	0	0	0	0	0	0	0	0	0	0	0	0	0	0	0	0	0	1	0	0	0	0	0	0	0	0	0	1	0	0	0	0	0	0	0	0	0	0	0	0	0	0	0	0	0	0	0	0	0
AKR7A2	0	0	0	0	0	0	0	0	0	0	0	0	0	0	0	0	0	1	0	0	0	0	2	0	0	0	0	1	1	0	0	0	0	0	0	0	0	0	2	0	0	0	0	0	1	0	0	0	0
ARPC4	0	0	0	0	0	0	0	0	0	0	0	0	0	0	0	0	0	1	0	0	1	0	0	0	0	0	0	0	0	0	0	0	0	0	0	0	0	0	0	0	0	0	0	0	0	0	0	0	0
B3GAT3	0	0	0	0	0	0	0	0	0	0	0	0	0	0	0	0	0	1	0	0	0	0	0	0	0	0	0	0	0	0	0	0	0	0	0	0	0	0	0	0	0	0	0	0	0	0	0	0	0
BRD9	0	0	0	0	0	0	0	0	0	0	0	0	0	0	0	0	0	1	0	0	0	0	0	0	0	0	0	0	0	0	0	0	0	0	0	0	0	0	0	0	0	0	0	0	0	0	0	0	0
CARHSP1	0	0	0	0	0	0	0	0	0	0	0	0	0	0	0	0	0	1	0	0	0	0	0	0	0	0	0	0	0	1	0	0	0	0	0	0	0	0	0	0	0	0	0	0	0	0	0	0	0
CCNC	0	0	0	0	0	0	0	0	0	0	0	0	0	0	0	0	0	1	0	0	0	0	0	0	0	0	0	0	0	0	0	0	0	0	0	0	0	0	0	0	0	0	0	0	0	0	0	0	0
ECM1	0	0	0	0	0	0	0	0	0	0	0	0	0	0	0	0	0	1	0	0	0	0	0	0	0	0	0	0	0	0	0	0	0	0	0	0	0	0	0	0	0	0	0	0	0	0	0	0	0
F13B	0	0	0	0	0	0	0	0	0	0	0	0	0	0	0	0	0	1	0	0	0	0	0	0	0	0	0	0	0	0	0	0	0	0	0	0	0	0	0	0	0	0	0	0	0	0	0	0	0
GMPPB	0	0	0	0	0	0	0	0	0	0	0	0	0	0	0	0	0	1	0	0	0	0	1	0	0	0	0	0	0	0	0	0	0	0	0	0	1	0	0	0	0	0	0	0	0	0	0	0	0
GNE	0	0	0	0	0	0	0	0	0	0	0	0	0	0	0	0	0	1	0	0	0	0	0	0	0	0	0	0	0	0	0	0	0	0	0	0	0	0	0	0	0	0	0	1	0	0	0	0	0
GSTA3	0	0	0	0	0	0	0	0	0	0	0	0	0	0	0	0	0	1	0	0	0	0	0	0	0	0	0	0	0	0	0	0	0	0	0	0	0	0	0	0	0	0	0	0	0	0	0	0	0
HBE1	0	0	0	0	0	0	0	0	0	0	0	0	0	0	0	0	0	1	0	0	0	0	0	0	0	0	0	0	0	0	0	0	0	0	0	0	0	0	0	0	0	0	0	1	0	0	0	0	0
HECTD1	0	0	0	0	0	0	0	0	0	0	0	0	0	0	0	0	0	1	0	0	0	0	0	0	0	0	0	0	0	0	0	0	0	0	0	0	0	0	0	0	0	0	0	0	0	0	0	0	0
HNRNPCL2	0	0	0	0	0	0	0	0	0	0	0	0	0	0	0	0	0	1	0	0	0	2	0	0	0	0	0	0	1	0	0	0	0	0	0	0	0	0	0	0	0	0	0	0	0	0	0	0	0
IGFALS	0	0	0	0	0	0	0	0	0	0	0	0	0	0	0	0	0	1	0	0	0	0	0	0	0	0	0	0	0	0	0	0	0	0	0	0	0	0	0	0	0	0	0	0	0	0	0	0	0
MYO6	0	0	0	0	0	0	0	0	0	0	0	0	0	0	0	0	0	1	0	0	0	0	0	1	0	0	0	0	0	1	0	0	0	0	0	0	0	0	0	0	0	0	0	0	0	0	0	0	0
NOL6	0	0	0	0	0	0	0	0	0	0	0	0	0	0	0	0	0	1	0	0	0	2	0	2	0	0	0	0	0	0	0	0	0	0	0	0	0	0	0	0	1	1	0	1	1	0	0	0	0
RCC2	0	0	0	0	0	0	0	0	0	0	0	0	0	0	0	0	0	2	0	0	0	1	0	1	0	0	0	0	0	0	0	0	0	0	0	0	1	0	0	0	0	0	0	0	0	0	0	0	0
SAE1	0	0	0	0	0	0	0	0	0	0	0	0	0	0	0	0	0	1	0	0	0	0	0	0	0	0	0	0	0	0	0	0	0	0	0	0	0	0	0	0	0	0	0	0	0	0	0	0	0
TRIM25	0	0	0	0	0	0	0	0	0	0	0	0	0	0	0	0	0	1	0	0	0	0	0	0	0	0	0	0	0	0	0	0	0	0	0	0	0	0	0	0	0	0	0	0	0	0	0	0	0
TRMT112	0	0	0	0	0	0	0	0	0	0	0	0	0	0	0	0	0	1	0	0	0	0	0	0	0	0	0	0	0	1	0	0	0	0	0	0	0	0	0	0	0	0	0	0	0	0	0	0	0
ZNF462	0	0	0	0	0	0	0	0	0	0	0	0	0	0	0	0	0	1	0	0	0	0	0	0	0	0	0	0	0	0	0	0	0	0	0	0	0	0	0	0	0	0	0	0	0	0	0	0	0
DDX10	0	0	0	0	0	0	0	0	0	0	0	0	0	0	0	0	0	0	1	0	0	0	0	0	0	0	0	0	0	0	0	0	0	0	0	0	0	0	0	0	0	0	0	0	0	0	0	0	0
FZD7	0	0	0	0	0	0	0	0	0	0	0	0	0	0	0	0	0	0	1	1	1	0	0	0	0	0	0	0	0	0	0	0	1	0	0	0	0	1	0	0	0	0	0	0	0	0	0	1	1
IKBKG	0	0	0	0	0	0	0	0	0	0	0	0	0	0	0	0	0	0	1	0	0	1	4	1	0	0	1	37	69	121	58	48	47	0	1	0	1	2	2	6	8	8	9	5	5	0	0	0	0
OPTN	0	0	0	0	0	0	0	0	0	0	0	0	0	0	0	0	0	0	2	0	0	0	0	0	0	0	0	0	0	0	0	0	0	0	0	0	0	0	0	0	0	0	0	0	0	0	0	0	0
PROS1	0	0	0	0	0	0	0	0	0	0	0	0	0	0	0	0	0	0	1	0	0	0	0	0	0	0	0	0	0	0	0	0	0	0	0	0	0	0	0	0	0	0	0	0	0	0	0	0	0
RIPK1	0	0	0	0	0	0	0	0	0	0	0	0	0	0	0	0	0	0	1	3	1	2	2	2	0	1	3	0	0	0	0	0	2	6	6	5	3	5	4	0	0	0	0	0	0	0	0	0	1
S1PR2	0	0	0	0	0	0	0	0	0	0	0	0	0	0	0	0	0	0	1	1	0	1	1	0	0	0	0	0	0	0	0	0	0	0	0	0	1	1	1	0	1	0	0	0	0	0	0	0	0
SIRPA	0	0	0	0	0	0	0	0	0	0	0	0	0	0	0	0	0	0	1	0	0	0	0	0	0	0	0	0	0	0	0	0	0	0	0	0	0	0	0	0	0	0	0	0	0	0	0	0	0
SLITRK1	0	0	0	0	0	0	0	0	0	0	0	0	0	0	0	0	0	0	1	0	0	0	0	0	0	0	0	0	0	0	0	0	0	1	0	0	0	0	0	0	0	0	0	0	0	0	0	1	0
TNF	0	0	0	0	0	0	0	0	0	0	0	0	0	0	0	0	0	0	5	3	4	0	0	0	0	0	3	0	0	0	3	1	5	0	1	0	0	0	0	0	0	0	0	0	0	0	0	0	5
TNFRSF1A	0	0	0	0	0	0	0	0	0	0	0	0	0	0	0	0	0	0	5	5	1	0	0	0	0	0	1	0	0	0	0	0	4	0	0	0	0	0	0	0	0	0	0	0	0	0	0	0	4
TRADD	0	0	0	0	0	0	0	0	0	0	0	0	0	0	0	0	0	0	5	1	1	27	36	25	20	19	33	0	0	0	0	0	2	0	0	0	0	0	0	0	0	0	0	0	0	1	0	2	6
AFM	0	0	0	0	0	0	0	0	0	0	0	0	0	0	0	0	0	0	0	1	1	0	0	0	1	1	1	0	0	0	0	1	0	0	0	0	0	0	0	0	0	0	0	0	0	0	0	0	0
GALNT1	0	0	0	0	0	0	0	0	0	0	0	0	0	0	0	0	0	0	0	1	1	1	0	0	0	0	0	0	0	0	0	0	0	0	0	0	0	0	0	0	0	0	0	0	0	0	0	0	0
HSPA2	0	0	0	0	0	0	0	0	0	0	0	0	0	0	0	0	0	0	0	1	0	1	0	0	0	0	0	0	0	0	0	0	0	0	0	0	0	0	0	0	1	1	0	2	0	0	0	0	0
LRRC69	0	0	0	0	0	0	0	0	0	0	0	0	0	0	0	0	0	0	0	1	1	0	0	0	0	0	0	0	0	0	0	0	0	0	0	0	0	0	0	0	0	0	0	0	0	0	0	0	0
ROR1	0	0	0	0	0	0	0	0	0	0	0	0	0	0	0	0	0	0	0	1	0	0	0	0	0	0	0	0	0	0	0	0	0	0	0	0	0	1	1	0	0	0	0	0	0	0	0	0	0
SDK2	0	0	0	0	0	0	0	0	0	0	0	0	0	0	0	0	0	0	0	1	1	0	0	1	0	0	0	0	0	0	0	0	0	0	0	0	0	0	2	0	0	2	0	0	0	0	0	1	0
SEPSECS	0	0	0	0	0	0	0	0	0	0	0	0	0	0	0	0	0	0	0	1	1	0	0	1	0	0	0	0	0	0	0	0	0	0	0	0	0	0	0	0	0	0	0	0	0	0	0	0	0
SLC26A2	0	0	0	0	0	0	0	0	0	0	0	0	0	0	0	0	0	0	0	2	1	0	0	0	0	0	0	0	0	0	0	0	0	0	0	0	0	0	0	0	0	1	0	0	0	0	0	0	0
TTYH2	0	0	0	0	0	0	0	0	0	0	0	0	0	0	0	0	0	0	0	1	0	0	0	0	0	0	0	0	0	0	0	0	0	0	0	0	0	0	0	0	0	0	0	0	0	0	0	0	0
ADAM15	0	0	0	0	0	0	0	0	0	0	0	0	0	0	0	0	0	0	0	0	1	0	0	0	0	0	0	0	0	0	0	0	0	0	0	0	0	0	0	0	0	0	0	0	0	0	0	0	0
AKAP8	0	0	0	0	0	0	0	0	0	0	0	0	0	0	0	0	0	0	0	0	1	0	0	1	0	0	0	0	0	0	0	0	0	0	0	0	0	0	0	0	0	0	0	0	0	0	0	0	0
ARL6IP1	0	0	0	0	0	0	0	0	0	0	0	0	0	0	0	0	0	0	0	0	1	0	0	0	0	0	0	0	0	0	0	0	0	0	0	0	0	0	0	0	0	0	0	0	0	0	0	0	0
CCDC50	0	0	0	0	0	0	0	0	0	0	0	0	0	0	0	0	0	0	0	0	1	0	0	0	0	0	0	0	0	0	0	0	0	2	2	1	0	0	0	0	1	1	0	0	0	0	0	0	0
CD82	0	0	0	0	0	0	0	0	0	0	0	0	0	0	0	0	0	0	0	0	1	0	0	0	0	0	0	0	0	0	0	0	1	0	0	0	0	0	1	0	0	0	0	0	0	0	0	3	2
F2RL1	0	0	0	0	0	0	0	0	0	0	0	0	0	0	0	0	0	0	0	0	1	0	0	0	0	0	0	0	0	0	0	0	0	1	0	0	0	0	0	0	1	0	0	0	0	0	0	0	0
GNG4	0	0	0	0	0	0	0	0	0	0	0	0	0	0	0	0	0	0	0	0	1	0	0	0	0	0	0	0	0	0	0	0	0	0	0	0	0	0	0	0	0	0	0	0	0	0	0	0	0
GOLT1B	0	0	0	0	0	0	0	0	0	0	0	0	0	0	0	0	0	0	0	0	1	0	0	0	0	0	0	0	0	0	0	0	0	0	0	0	0	0	0	0	0	0	0	0	0	1	0	0	0
PCDH20	0	0	0	0	0	0	0	0	0	0	0	0	0	0	0	0	0	0	0	0	1	0	0	0	0	0	0	0	0	0	0	0	0	0	0	0	0	0	0	0	0	0	0	0	0	0	0	0	0
SLC35F2	0	0	0	0	0	0	0	0	0	0	0	0	0	0	0	0	0	0	0	0	1	0	0	0	0	0	0	0	0	0	0	0	0	0	0	0	0	0	0	0	0	0	0	0	0	0	0	0	0
ANTXR1	0	0	0	0	0	0	0	0	0	0	0	0	0	0	0	0	0	0	0	0	0	1	0	1	0	0	0	0	0	0	0	0	0	0	0	0	0	0	0	0	0	0	0	0	0	0	0	0	0
ASNA1	0	0	0	0	0	0	0	0	0	0	0	0	0	0	0	0	0	0	0	0	0	1	0	0	0	0	0	0	0	0	0	0	0	0	0	0	0	0	0	0	0	0	0	0	1	0	0	0	0
B4GALT4	0	0	0	0	0	0	0	0	0	0	0	0	0	0	0	0	0	0	0	0	0	1	0	0	0	0	0	0	0	0	0	0	0	0	0	0	0	0	0	0	0	0	0	0	0	0	0	0	0
CALR	0	0	0	0	0	0	0	0	0	0	0	0	0	0	0	0	0	0	0	0	0	1	0	0	0	0	0	0	0	0	0	0	0	0	0	0	0	0	0	0	0	0	0	0	0	0	0	1	0
CASP8	0	0	0	0	0	0	0	0	0	0	0	0	0	0	0	0	0	0	0	0	0	1	2	1	1	1	5	0	0	0	0	0	0	1	1	1	0	1	1	0	0	0	0	0	0	0	0	0	0
CCAR2	0	0	0	0	0	0	0	0	0	0	0	0	0	0	0	0	0	0	0	0	0	2	1	2	0	0	0	0	0	1	0	0	0	0	0	0	0	0	0	0	0	0	0	0	0	0	0	0	0
CHPF	0	0	0	0	0	0	0	0	0	0	0	0	0	0	0	0	0	0	0	0	0	1	0	1	0	0	0	0	0	0	0	0	0	0	0	0	0	0	0	0	0	0	0	0	0	0	0	0	0
CMAS	0	0	0	0	0	0	0	0	0	0	0	0	0	0	0	0	0	0	0	0	0	1	0	0	0	0	0	0	0	0	0	0	0	0	0	0	0	0	0	0	0	0	0	0	0	0	0	0	0
COASY	0	0	0	0	0	0	0	0	0	0	0	0	0	0	0	0	0	0	0	0	0	1	0	1	0	0	0	0	0	0	0	0	0	0	0	0	0	0	0	0	0	0	0	0	0	0	0	0	0
COL1A1	0	0	0	0	0	0	0	0	0	0	0	0	0	0	0	0	0	0	0	0	0	1	0	0	0	0	0	0	0	0	0	0	0	0	0	0	0	0	0	0	0	0	0	0	0	0	0	0	0
COL1A2	0	0	0	0	0	0	0	0	0	0	0	0	0	0	0	0	0	0	0	0	0	1	0	0	0	0	0	0	0	0	0	0	0	0	0	0	0	0	0	0	0	0	0	0	0	0	0	0	0
DKC1	0	0	0	0	0	0	0	0	0	0	0	0	0	0	0	0	0	0	0	0	0	1	0	0	0	0	0	0	0	0	0	0	0	0	0	0	0	0	0	0	0	0	0	0	0	0	0	0	0
DUS3L	0	0	0	0	0	0	0	0	0	0	0	0	0	0	0	0	0	0	0	0	0	1	0	1	0	0	0	0	0	0	0	0	0	0	0	0	0	0	0	0	0	0	0	0	0	0	0	0	0
EPB41L4B	0	0	0	0	0	0	0	0	0	0	0	0	0	0	0	0	0	0	0	0	0	1	0	0	0	0	0	0	0	0	0	0	0	0	0	0	0	1	1	0	0	0	0	0	0	0	0	0	0
EXOSC4	0	0	0	0	0	0	0	0	0	0	0	0	0	0	0	0	0	0	0	0	0	1	0	0	0	0	0	0	0	0	0	0	0	0	0	0	0	0	0	0	0	0	0	0	0	0	0	0	0
FADD	0	0	0	0	0	0	0	0	0	0	0	0	0	0	0	0	0	0	0	0	0	1	5	4	4	4	6	0	0	0	0	0	0	56	50	53	11	26	8	0	0	0	2	0	0	0	0	0	0
FAM188A	0	0	0	0	0	0	0	0	0	0	0	0	0	0	0	0	0	0	0	0	0	1	1	2	0	0	0	0	0	0	0	0	0	0	0	0	0	0	0	0	0	0	0	0	0	0	1	1	2
GOLGA7B	0	0	0	0	0	0	0	0	0	0	0	0	0	0	0	0	0	0	0	0	0	1	0	0	0	0	0	0	0	0	0	0	0	0	0	0	1	1	0	0	0	1	0	0	0	0	0	0	0
KLKB1	0	0	0	0	0	0	0	0	0	0	0	0	0	0	0	0	0	0	0	0	0	1	0	1	0	0	0	0	0	0	0	0	0	0	0	0	0	0	0	0	0	0	0	0	0	0	0	0	0
NAA50	0	0	0	0	0	0	0	0	0	0	0	0	0	0	0	0	0	0	0	0	0	1	0	0	0	0	0	0	0	1	0	0	0	0	0	0	0	0	0	0	0	0	1	1	1	0	0	0	0
NLGN1	0	0	0	0	0	0	0	0	0	0	0	0	0	0	0	0	0	0	0	0	0	1	0	1	0	0	0	0	0	0	0	0	0	0	0	0	0	0	0	0	1	0	0	0	0	0	0	0	0
NUP85	0	0	0	0	0	0	0	0	0	0	0	0	0	0	0	0	0	0	0	0	0	2	0	0	0	0	0	0	0	0	0	0	0	0	0	0	0	0	0	0	0	1	0	0	0	0	0	0	0
OGN	0	0	0	0	0	0	0	0	0	0	0	0	0	0	0	0	0	0	0	0	0	1	0	1	0	0	0	0	0	0	0	0	0	0	0	0	0	0	0	0	1	1	0	1	1	0	0	0	0
PCOLCE2	0	0	0	0	0	0	0	0	0	0	0	0	0	0	0	0	0	0	0	0	0	1	1	1	0	0	0	0	0	0	0	0	0	0	0	0	0	0	0	0	0	0	0	0	0	0	0	0	0
PDGFC	0	0	0	0	0	0	0	0	0	0	0	0	0	0	0	0	0	0	0	0	0	1	0	0	0	0	0	0	0	0	0	0	0	0	0	0	0	0	0	0	0	0	0	0	0	0	0	0	0
POLR1A	0	0	0	0	0	0	0	0	0	0	0	0	0	0	0	0	0	0	0	0	0	1	1	1	0	0	0	0	0	0	0	0	0	0	0	0	0	0	0	0	0	0	0	0	0	0	0	0	0
POLR2J	0	0	0	0	0	0	0	0	0	0	0	0	0	0	0	0	0	0	0	0	0	1	0	0	0	0	0	0	0	0	0	0	0	0	0	0	0	0	0	0	0	0	0	0	0	0	0	0	0
PPIC	0	0	0	0	0	0	0	0	0	0	0	0	0	0	0	0	0	0	0	0	0	1	0	0	0	0	0	0	0	0	0	0	0	0	0	0	0	0	0	0	0	0	0	0	0	0	0	0	0
PRPF4B	0	0	0	0	0	0	0	0	0	0	0	0	0	0	0	0	0	0	0	0	0	1	0	0	0	0	0	0	0	0	0	0	0	0	0	0	0	0	0	0	0	0	0	0	0	0	0	0	0
RBP4	0	0	0	0	0	0	0	0	0	0	0	0	0	0	0	0	0	0	0	0	0	1	0	0	1	1	0	0	0	0	0	0	0	0	0	0	0	0	0	0	0	0	0	0	0	0	0	0	0
RFC3	0	0	0	0	0	0	0	0	0	0	0	0	0	0	0	0	0	0	0	0	0	1	1	0	0	0	0	0	0	0	0	0	0	0	0	0	0	0	0	0	3	0	2	1	1	0	0	0	1
RNF115	0	0	0	0	0	0	0	0	0	0	0	0	0	0	0	0	0	0	0	0	0	1	1	1	0	0	1	0	0	0	0	0	0	0	0	0	0	0	0	0	2	2	0	0	0	0	0	1	1
RRP9	0	0	0	0	0	0	0	0	0	0	0	0	0	0	0	0	0	0	0	0	0	1	1	1	0	0	0	0	0	0	0	0	0	0	0	0	0	0	0	0	0	0	0	0	0	0	0	0	0
SEC13	0	0	0	0	0	0	0	0	0	0	0	0	0	0	0	0	0	0	0	0	0	1	0	0	0	0	0	0	0	0	0	0	0	0	0	0	0	0	0	0	0	0	0	0	0	0	0	0	0
SMARCC2	0	0	0	0	0	0	0	0	0	0	0	0	0	0	0	0	0	0	0	0	0	1	0	0	0	0	0	0	0	0	0	0	0	0	0	0	0	0	0	0	0	0	0	0	0	0	0	0	0
SRP19	0	0	0	0	0	0	0	0	0	0	0	0	0	0	0	0	0	0	0	0	0	1	0	1	0	0	0	0	0	0	0	0	0	0	0	0	0	0	0	0	0	0	0	0	0	0	0	0	0
TLE3	0	0	0	0	0	0	0	0	0	0	0	0	0	0	0	0	0	0	0	0	0	1	0	0	0	0	0	0	0	0	0	0	0	0	0	0	0	0	0	0	0	0	0	0	0	0	0	0	0
TRAF3	0	0	0	0	0	0	0	0	0	0	0	0	0	0	0	0	0	0	0	0	0	1	1	3	0	0	1	0	0	0	0	0	0	0	0	0	0	0	0	5	10	6	4	5	5	2	0	3	1
UEVLD	0	0	0	0	0	0	0	0	0	0	0	0	0	0	0	0	0	0	0	0	0	3	6	4	0	0	1	0	0	0	0	0	0	0	0	0	0	0	0	0	1	3	0	0	0	0	1	0	0
ULK3	0	0	0	0	0	0	0	0	0	0	0	0	0	0	0	0	0	0	0	0	0	2	9	8	0	0	5	0	0	0	0	0	1	0	0	1	0	2	1	0	5	4	3	2	1	2	0	2	4
ADAR	0	0	0	0	0	0	0	0	0	0	0	0	0	0	0	0	0	0	0	0	0	0	1	0	0	0	0	0	0	0	0	0	0	0	0	0	0	0	0	0	0	0	0	0	0	0	0	0	0
ATP6AP1	0	0	0	0	0	0	0	0	0	0	0	0	0	0	0	0	0	0	0	0	0	0	1	0	0	0	0	0	0	0	0	0	0	0	0	0	0	0	0	0	0	0	0	0	0	0	0	0	0
CUL2	0	0	0	0	0	0	0	0	0	0	0	0	0	0	0	0	0	0	0	0	0	0	1	0	0	0	0	0	0	0	0	0	0	0	0	0	0	0	0	0	0	0	0	1	0	0	0	0	0
DENND5A	0	0	0	0	0	0	0	0	0	0	0	0	0	0	0	0	0	0	0	0	0	0	3	0	0	0	0	0	0	0	0	0	1	0	0	0	0	0	0	0	0	0	0	0	0	0	0	1	1
DHFR	0	0	0	0	0	0	0	0	0	0	0	0	0	0	0	0	0	0	0	0	0	0	1	0	0	0	0	0	0	1	0	0	0	0	0	0	0	0	0	0	1	0	0	0	0	0	0	3	4
EIF2B4	0	0	0	0	0	0	0	0	0	0	0	0	0	0	0	0	0	0	0	0	0	0	1	0	0	0	0	0	0	0	0	0	0	0	0	0	0	0	0	0	0	0	0	0	0	0	0	0	0
EMILIN3	0	0	0	0	0	0	0	0	0	0	0	0	0	0	0	0	0	0	0	0	0	0	1	0	0	0	0	0	0	0	0	0	0	0	0	0	0	0	0	0	0	0	0	0	0	0	0	0	0
HAPLN3	0	0	0	0	0	0	0	0	0	0	0	0	0	0	0	0	0	0	0	0	0	0	1	1	0	0	0	0	1	0	0	0	0	0	0	0	0	0	0	0	1	0	0	0	0	0	0	0	0
HERC4	0	0	0	0	0	0	0	0	0	0	0	0	0	0	0	0	0	0	0	0	0	0	1	1	0	0	0	0	0	0	0	0	0	0	0	0	0	0	0	0	0	0	0	0	0	0	0	0	0
MAGOH	0	0	0	0	0	0	0	0	0	0	0	0	0	0	0	0	0	0	0	0	0	0	1	0	0	0	0	0	0	0	0	0	0	0	0	0	0	0	0	0	0	0	0	0	0	0	0	0	0
NTPCR	0	0	0	0	0	0	0	0	0	0	0	0	0	0	0	0	0	0	0	0	0	0	1	0	0	0	0	0	0	2	0	0	0	0	0	0	0	0	0	0	1	2	0	0	0	0	0	0	0
PAFAH1B1	0	0	0	0	0	0	0	0	0	0	0	0	0	0	0	0	0	0	0	0	0	0	1	0	0	0	0	0	0	0	0	0	0	0	0	0	0	0	1	0	2	0	0	3	3	0	0	0	0
PDPN	0	0	0	0	0	0	0	0	0	0	0	0	0	0	0	0	0	0	0	0	0	0	1	1	0	0	0	0	0	0	0	0	0	0	0	0	0	0	0	0	0	0	0	1	0	0	0	1	0
PRPS1	0	0	0	0	0	0	0	0	0	0	0	0	0	0	0	0	0	0	0	0	0	0	1	0	0	0	0	0	0	0	0	0	0	0	0	0	0	0	0	0	0	0	0	0	0	0	0	0	0
PRPSAP1	0	0	0	0	0	0	0	0	0	0	0	0	0	0	0	0	0	0	0	0	0	0	1	0	0	0	0	0	0	0	0	0	0	0	0	0	0	0	1	0	0	0	0	0	1	0	0	0	0
RANBP2	0	0	0	0	0	0	0	0	0	0	0	0	0	0	0	0	0	0	0	0	0	0	1	1	0	0	0	0	0	0	0	0	0	0	0	0	0	0	0	0	0	0	0	0	0	0	0	0	0
SLC7A11	0	0	0	0	0	0	0	0	0	0	0	0	0	0	0	0	0	0	0	0	0	0	1	0	0	0	0	0	0	0	0	0	1	1	1	1	0	0	1	0	0	1	0	0	0	0	0	1	1
SRPK1	0	0	0	0	0	0	0	0	0	0	0	0	0	0	0	0	0	0	0	0	0	0	1	0	0	0	0	0	0	0	0	0	0	0	0	0	0	0	0	0	0	0	0	0	0	0	0	0	0
TENM3	0	0	0	0	0	0	0	0	0	0	0	0	0	0	0	0	0	0	0	0	0	0	1	2	0	0	0	0	0	0	0	0	1	0	0	0	0	0	1	0	1	1	0	0	0	0	0	1	2
TOR2A	0	0	0	0	0	0	0	0	0	0	0	0	0	0	0	0	0	0	0	0	0	0	1	0	0	0	0	0	0	0	0	0	0	0	0	0	0	0	0	0	0	0	0	0	0	0	0	0	0
VRK1	0	0	0	0	0	0	0	0	0	0	0	0	0	0	0	0	0	0	0	0	0	0	1	0	0	0	0	0	0	0	0	0	0	0	0	0	1	0	0	0	0	0	0	0	0	0	0	0	0
ADAMTS13	0	0	0	0	0	0	0	0	0	0	0	0	0	0	0	0	0	0	0	0	0	0	0	1	0	0	0	0	0	0	0	0	0	0	0	0	0	0	0	0	0	0	0	0	0	0	0	0	0
ASCC3	0	0	0	0	0	0	0	0	0	0	0	0	0	0	0	0	0	0	0	0	0	0	0	1	0	0	0	0	0	0	0	0	0	0	0	0	0	0	0	0	0	0	0	0	0	0	0	0	0
BIRC2	0	0	0	0	0	0	0	0	0	0	0	0	0	0	0	0	0	0	0	0	0	0	0	2	0	0	0	0	0	0	0	0	0	0	0	0	0	0	0	0	3	4	1	3	1	10	8	15	11
CTPS2	0	0	0	0	0	0	0	0	0	0	0	0	0	0	0	0	0	0	0	0	0	0	0	1	0	0	0	0	0	0	0	0	0	0	0	0	0	0	0	0	0	0	0	0	0	0	0	0	0
DNAJB4	0	0	0	0	0	0	0	0	0	0	0	0	0	0	0	0	0	0	0	0	0	0	0	1	0	0	0	0	0	0	0	0	0	0	0	0	0	0	0	0	3	2	0	0	0	0	0	1	0
DRC1	0	0	0	0	0	0	0	0	0	0	0	0	0	0	0	0	0	0	0	0	0	0	0	1	0	0	0	0	0	0	0	0	0	0	0	0	0	0	0	0	0	0	0	0	0	0	0	0	0
DRG1	0	0	0	0	0	0	0	0	0	0	0	0	0	0	0	0	0	0	0	0	0	0	0	2	0	0	0	0	0	0	0	0	0	0	0	0	0	0	0	0	1	0	0	0	0	0	0	0	0
EIF3C	0	0	0	0	0	0	0	0	0	0	0	0	0	0	0	0	0	0	0	0	0	0	0	3	0	0	0	0	0	0	0	0	0	0	0	0	0	0	0	0	0	0	0	0	0	0	0	0	0
EPHB3	0	0	0	0	0	0	0	0	0	0	0	0	0	0	0	0	0	0	0	0	0	0	0	1	0	0	0	0	0	0	0	0	0	0	0	0	0	0	0	0	0	0	0	0	0	0	0	0	0
FAM20C	0	0	0	0	0	0	0	0	0	0	0	0	0	0	0	0	0	0	0	0	0	0	0	1	0	0	0	0	0	0	0	0	0	0	0	0	0	0	0	0	0	0	0	1	3	0	0	0	0
FLAD1	0	0	0	0	0	0	0	0	0	0	0	0	0	0	0	0	0	0	0	0	0	0	0	1	0	0	0	0	0	0	0	0	0	0	0	0	0	0	0	0	0	0	0	0	0	0	0	0	0
GAPVD1	0	0	0	0	0	0	0	0	0	0	0	0	0	0	0	0	0	0	0	0	0	0	0	1	0	0	0	0	0	0	0	0	0	0	0	0	0	0	0	0	0	0	0	0	0	0	0	0	0
GET4	0	0	0	0	0	0	0	0	0	0	0	0	0	0	0	0	0	0	0	0	0	0	0	1	0	0	0	0	0	0	0	0	0	0	0	0	0	0	0	0	0	0	0	0	0	0	0	0	0
GSK3A	0	0	0	0	0	0	0	0	0	0	0	0	0	0	0	0	0	0	0	0	0	0	0	1	0	0	0	0	0	0	0	0	0	0	0	0	0	0	0	0	7	4	1	2	1	0	0	0	0
HGFAC	0	0	0	0	0	0	0	0	0	0	0	0	0	0	0	0	0	0	0	0	0	0	0	1	0	0	0	0	0	0	0	0	0	0	0	0	0	0	0	0	0	0	0	0	0	0	0	0	0
HPRT1	0	0	0	0	0	0	0	0	0	0	0	0	0	0	0	0	0	0	0	0	0	0	0	1	0	0	0	0	0	1	0	0	0	0	0	0	0	0	0	0	0	0	0	0	0	0	0	0	0
HS6ST1	0	0	0	0	0	0	0	0	0	0	0	0	0	0	0	0	0	0	0	0	0	0	0	1	0	0	0	0	0	0	0	0	1	0	0	0	0	0	0	1	0	0	0	0	0	0	0	0	0
HUWE1	0	0	0	0	0	0	0	0	0	0	0	0	0	0	0	0	0	0	0	0	0	0	0	1	0	0	0	0	0	0	0	0	0	0	0	0	0	0	0	0	0	0	0	1	0	0	0	0	0
MBTPS1	0	0	0	0	0	0	0	0	0	0	0	0	0	0	0	0	0	0	0	0	0	0	0	1	0	0	0	0	0	0	0	0	0	0	0	0	0	0	0	0	0	0	1	1	0	0	0	0	0
MTA1	0	0	0	0	0	0	0	0	0	0	0	0	0	0	0	0	0	0	0	0	0	0	0	1	0	0	0	0	0	0	0	0	0	0	0	0	0	0	0	0	0	0	0	0	0	0	0	0	0
NCBP2	0	0	0	0	0	0	0	0	0	0	0	0	0	0	0	0	0	0	0	0	0	0	0	1	0	0	0	0	0	1	0	0	0	0	0	0	0	0	0	0	0	0	0	0	0	0	0	0	0
NID2	0	0	0	0	0	0	0	0	0	0	0	0	0	0	0	0	0	0	0	0	0	0	0	1	0	0	0	0	0	0	0	0	0	0	0	0	0	0	0	0	0	0	0	0	0	0	0	0	0
PABPC4L	0	0	0	0	0	0	0	0	0	0	0	0	0	0	0	0	0	0	0	0	0	0	0	1	0	0	0	0	0	0	0	0	0	0	0	0	0	0	0	0	0	0	0	0	0	0	0	0	0
PKN2	0	0	0	0	0	0	0	0	0	0	0	0	0	0	0	0	0	0	0	0	0	0	0	2	0	0	0	0	0	0	0	0	0	0	0	0	0	0	0	0	2	3	0	1	0	0	0	0	0
POLR1D	0	0	0	0	0	0	0	0	0	0	0	0	0	0	0	0	0	0	0	0	0	0	0	1	0	0	0	0	0	0	0	0	0	0	0	0	0	0	0	0	0	0	0	0	1	0	0	0	0
PWP2	0	0	0	0	0	0	0	0	0	0	0	0	0	0	0	0	0	0	0	0	0	0	0	1	0	0	0	1	0	0	0	0	0	0	0	0	0	0	0	0	1	0	0	0	0	0	0	0	0
PYGB	0	0	0	0	0	0	0	0	0	0	0	0	0	0	0	0	0	0	0	0	0	0	0	1	0	0	0	0	0	0	0	0	0	0	0	0	0	0	0	0	0	0	0	1	0	0	0	0	0
RPA1	0	0	0	0	0	0	0	0	0	0	0	0	0	0	0	0	0	0	0	0	0	0	0	1	0	0	0	0	0	1	0	0	0	0	0	0	0	0	0	0	0	0	0	0	0	0	0	0	0
RTCA	0	0	0	0	0	0	0	0	0	0	0	0	0	0	0	0	0	0	0	0	0	0	0	1	0	0	0	0	0	0	0	0	0	0	0	0	0	0	0	0	0	0	0	0	0	0	0	0	0
SETD2	0	0	0	0	0	0	0	0	0	0	0	0	0	0	0	0	0	0	0	0	0	0	0	1	0	0	0	0	0	0	0	0	0	0	0	0	0	0	0	0	0	0	0	0	0	0	0	0	0
SMARCD2	0	0	0	0	0	0	0	0	0	0	0	0	0	0	0	0	0	0	0	0	0	0	0	1	0	0	0	0	0	0	0	0	0	0	0	0	0	0	1	0	0	1	0	0	0	0	0	0	0
SMARCE1	0	0	0	0	0	0	0	0	0	0	0	0	0	0	0	0	0	0	0	0	0	0	0	1	0	0	0	0	0	0	0	0	0	0	0	0	0	0	0	0	0	0	0	0	0	0	0	0	0
THOC6	0	0	0	0	0	0	0	0	0	0	0	0	0	0	0	0	0	0	0	0	0	0	0	1	0	0	0	0	0	0	0	0	0	0	0	0	0	0	0	0	0	0	0	0	0	0	0	0	0
TOP2A	0	0	0	0	0	0	0	0	0	0	0	0	0	0	0	0	0	0	0	0	0	0	0	1	0	0	0	0	0	0	0	0	0	0	0	0	0	0	0	0	0	0	0	0	1	0	0	0	0
TP53RK	0	0	0	0	0	0	0	0	0	0	0	0	0	0	0	0	0	0	0	0	0	0	0	1	0	0	0	0	0	0	0	0	0	0	0	0	0	0	0	0	0	0	0	0	0	0	0	0	0
TRIM33	0	0	0	0	0	0	0	0	0	0	0	0	0	0	0	0	0	0	0	0	0	0	0	1	0	0	0	0	0	0	0	0	0	0	0	0	0	0	0	0	0	0	0	0	0	0	0	0	0
TRMT6	0	0	0	0	0	0	0	0	0	0	0	0	0	0	0	0	0	0	0	0	0	0	0	1	0	0	0	0	1	0	0	0	0	0	0	0	0	0	1	0	0	0	0	2	1	0	0	0	0
TSPAN15	0	0	0	0	0	0	0	0	0	0	0	0	0	0	0	0	0	0	0	0	0	0	0	1	0	0	0	0	0	0	0	0	0	0	0	0	0	0	0	0	0	0	0	0	0	0	0	0	0
TTC37	0	0	0	0	0	0	0	0	0	0	0	0	0	0	0	0	0	0	0	0	0	0	0	1	0	0	0	0	0	0	0	0	0	0	0	0	0	0	0	0	0	0	0	0	0	0	0	0	0
UBE2V2	0	0	0	0	0	0	0	0	0	0	0	0	0	0	0	0	0	0	0	0	0	0	0	2	0	0	1	0	0	0	0	0	0	0	0	0	0	0	0	0	0	0	0	0	0	0	0	0	0
UBE3C	0	0	0	0	0	0	0	0	0	0	0	0	0	0	0	0	0	0	0	0	0	0	0	1	0	0	0	0	0	0	0	0	0	0	0	0	0	0	0	0	0	0	0	0	0	0	0	0	0
UMAD1	0	0	0	0	0	0	0	0	0	0	0	0	0	0	0	0	0	0	0	0	0	0	0	1	0	0	0	0	0	0	0	0	0	0	0	0	0	0	0	0	0	1	0	0	0	0	0	2	0
WDR3	0	0	0	0	0	0	0	0	0	0	0	0	0	0	0	0	0	0	0	0	0	0	0	1	0	0	0	0	0	0	0	0	0	0	0	0	0	0	0	0	0	0	0	0	0	0	0	0	0
WDR36	0	0	0	0	0	0	0	0	0	0	0	0	0	0	0	0	0	0	0	0	0	0	0	1	0	0	0	0	0	0	0	0	0	0	0	0	0	0	0	0	0	1	0	0	0	0	0	0	0
ZBTB6	0	0	0	0	0	0	0	0	0	0	0	0	0	0	0	0	0	0	0	0	0	0	0	1	0	0	0	0	0	0	0	0	0	0	0	0	0	0	0	0	0	0	0	0	0	0	0	0	0
ZC3HAV1L	0	0	0	0	0	0	0	0	0	0	0	0	0	0	0	0	0	0	0	0	0	0	0	1	0	0	0	0	0	1	0	0	0	0	0	0	0	0	0	0	0	0	0	1	0	0	0	0	0
C1QTNF3	0	0	0	0	0	0	0	0	0	0	0	0	0	0	0	0	0	0	0	0	0	0	0	0	1	1	0	0	0	0	0	0	0	0	0	0	0	0	0	0	0	0	0	1	0	0	0	0	0
CHST12	0	0	0	0	0	0	0	0	0	0	0	0	0	0	0	0	0	0	0	0	0	0	0	0	1	1	0	0	0	0	0	0	0	0	0	0	0	0	0	0	0	0	0	1	0	0	0	0	0
CLTCL1	0	0	0	0	0	0	0	0	0	0	0	0	0	0	0	0	0	0	0	0	0	0	0	0	1	0	0	0	0	0	0	0	0	0	0	0	0	0	0	0	0	0	0	0	0	0	0	0	0
FBXO7	0	0	0	0	0	0	0	0	0	0	0	0	0	0	0	0	0	0	0	0	0	0	0	0	1	0	0	0	0	0	0	0	0	0	0	0	0	0	0	0	0	0	0	0	0	0	0	0	0
OXSR1	0	0	0	0	0	0	0	0	0	0	0	0	0	0	0	0	0	0	0	0	0	0	0	0	1	0	0	0	0	0	0	0	0	0	0	0	0	0	0	0	1	1	0	2	1	0	0	0	0
THAP4	0	0	0	0	0	0	0	0	0	0	0	0	0	0	0	0	0	0	0	0	0	0	0	0	1	1	0	0	0	0	0	0	0	0	0	0	0	0	0	0	0	0	0	0	0	0	0	0	0
CHIA	0	0	0	0	0	0	0	0	0	0	0	0	0	0	0	0	0	0	0	0	0	0	0	0	0	1	0	0	0	0	0	0	0	0	0	0	0	0	0	0	0	0	0	0	0	0	0	0	0
FAT4	0	0	0	0	0	0	0	0	0	0	0	0	0	0	0	0	0	0	0	0	0	0	0	0	0	1	0	0	0	0	0	0	0	0	0	0	0	0	0	0	0	0	0	0	0	0	0	0	0
AKR1E2	0	0	0	0	0	0	0	0	0	0	0	0	0	0	0	0	0	0	0	0	0	0	0	0	0	0	1	0	0	0	0	0	0	0	0	0	0	0	0	0	0	0	1	0	0	0	0	0	0
PYCRL	0	0	0	0	0	0	0	0	0	0	0	0	0	0	0	0	0	0	0	0	0	0	0	0	0	0	1	0	0	0	0	0	0	0	0	0	0	0	0	0	0	0	0	0	0	0	0	0	0
RNF126	0	0	0	0	0	0	0	0	0	0	0	0	0	0	0	0	0	0	0	0	0	0	0	0	0	0	1	0	0	0	0	0	0	0	0	0	0	0	0	0	1	0	0	0	0	0	0	0	0
AMOT	0	0	0	0	0	0	0	0	0	0	0	0	0	0	0	0	0	0	0	0	0	0	0	0	0	0	0	9	29	25	11	4	30	0	0	0	0	0	0	1	22	13	7	9	6	0	0	0	0
AMOTL1	0	0	0	0	0	0	0	0	0	0	0	0	0	0	0	0	0	0	0	0	0	0	0	0	0	0	0	1	0	1	0	0	1	0	0	0	0	0	0	0	1	1	0	0	0	0	0	0	0
CHUK	0	0	0	0	0	0	0	0	0	0	0	0	0	0	0	0	0	0	0	0	0	0	0	0	0	0	0	3	10	9	6	2	17	0	0	0	0	0	2	7	11	11	5	4	4	0	0	0	0
EXT1	0	0	0	0	0	0	0	0	0	0	0	0	0	0	0	0	0	0	0	0	0	0	0	0	0	0	0	1	0	0	0	0	0	0	0	0	0	0	1	0	0	0	0	0	0	0	0	0	0
HAS1	0	0	0	0	0	0	0	0	0	0	0	0	0	0	0	0	0	0	0	0	0	0	0	0	0	0	0	1	0	0	0	0	0	0	0	0	0	0	0	0	0	0	0	0	0	0	0	0	0
IKBKB	0	0	0	0	0	0	0	0	0	0	0	0	0	0	0	0	0	0	0	0	0	0	0	0	0	0	0	2	5	6	4	1	14	0	0	0	0	0	0	3	8	6	4	1	2	0	0	0	0
NF2	0	0	0	0	0	0	0	0	0	0	0	0	0	0	0	0	0	0	0	0	0	0	0	0	0	0	0	1	4	5	2	0	6	0	0	0	0	0	0	0	2	4	1	1	1	0	0	0	0
SETD1B	0	0	0	0	0	0	0	0	0	0	0	0	0	0	0	0	0	0	0	0	0	0	0	0	0	0	0	1	0	0	0	0	0	0	0	0	0	0	0	0	0	0	0	0	0	0	0	0	0
TANK	0	0	0	0	0	0	0	0	0	0	0	0	0	0	0	0	0	0	0	0	0	0	0	0	0	0	0	1	0	1	2	0	3	0	0	0	0	0	1	30	80	44	76	29	26	0	1	2	3
ALMS1	0	0	0	0	0	0	0	0	0	0	0	0	0	0	0	0	0	0	0	0	0	0	0	0	0	0	0	0	5	4	0	0	6	0	0	0	0	0	0	0	0	0	0	0	0	0	0	0	0
CDK4	0	0	0	0	0	0	0	0	0	0	0	0	0	0	0	0	0	0	0	0	0	0	0	0	0	0	0	0	1	1	2	0	0	0	0	0	0	0	0	0	0	0	0	0	0	0	0	0	0
CEP85	0	0	0	0	0	0	0	0	0	0	0	0	0	0	0	0	0	0	0	0	0	0	0	0	0	0	0	0	1	0	0	0	0	0	0	0	0	0	0	0	0	0	0	0	0	0	0	0	0
CSNK1A1	0	0	0	0	0	0	0	0	0	0	0	0	0	0	0	0	0	0	0	0	0	0	0	0	0	0	0	0	6	4	1	0	14	1	4	4	1	3	4	1	6	7	4	2	4	0	0	1	1
CSNK1D	0	0	0	0	0	0	0	0	0	0	0	0	0	0	0	0	0	0	0	0	0	0	0	0	0	0	0	0	4	0	3	0	8	6	0	0	2	0	0	0	7	6	0	2	2	0	0	0	0
CTSB	0	0	0	0	0	0	0	0	0	0	0	0	0	0	0	0	0	0	0	0	0	0	0	0	0	0	0	0	1	0	0	0	0	0	0	0	0	0	0	0	0	0	0	0	0	0	0	0	0
DNAAF5	0	0	0	0	0	0	0	0	0	0	0	0	0	0	0	0	0	0	0	0	0	0	0	0	0	0	0	0	1	0	0	0	0	0	0	0	0	0	0	0	0	0	0	0	0	0	0	0	0
IDE	0	0	0	0	0	0	0	0	0	0	0	0	0	0	0	0	0	0	0	0	0	0	0	0	0	0	0	0	2	1	0	0	5	0	0	0	0	0	0	0	0	0	0	0	0	0	0	0	0
KIAA1671	0	0	0	0	0	0	0	0	0	0	0	0	0	0	0	0	0	0	0	0	0	0	0	0	0	0	0	0	2	4	2	0	1	0	0	0	0	0	0	0	0	0	0	0	0	0	0	0	0
LIMD1	0	0	0	0	0	0	0	0	0	0	0	0	0	0	0	0	0	0	0	0	0	0	0	0	0	0	0	0	1	0	0	0	0	0	0	0	0	0	0	0	0	0	0	0	0	0	0	0	0
LIN7A	0	0	0	0	0	0	0	0	0	0	0	0	0	0	0	0	0	0	0	0	0	0	0	0	0	0	0	0	1	0	0	0	0	0	0	0	0	0	0	0	0	0	0	0	0	0	0	0	0
MPHOSPH9	0	0	0	0	0	0	0	0	0	0	0	0	0	0	0	0	0	0	0	0	0	0	0	0	0	0	0	0	1	1	0	0	0	0	0	0	0	0	0	0	0	0	0	0	0	0	0	0	0
MPP5	0	0	0	0	0	0	0	0	0	0	0	0	0	0	0	0	0	0	0	0	0	0	0	0	0	0	0	0	1	3	2	0	1	0	0	0	0	0	0	0	0	0	0	0	0	0	0	0	0
NUP43	0	0	0	0	0	0	0	0	0	0	0	0	0	0	0	0	0	0	0	0	0	0	0	0	0	0	0	0	1	1	0	0	0	0	0	0	0	0	0	0	0	0	0	0	0	0	0	0	0
OIT3	0	0	0	0	0	0	0	0	0	0	0	0	0	0	0	0	0	0	0	0	0	0	0	0	0	0	0	0	1	0	0	0	0	0	0	0	0	0	0	0	0	0	0	1	1	0	0	0	0
RB1CC1	0	0	0	0	0	0	0	0	0	0	0	0	0	0	0	0	0	0	0	0	0	0	0	0	0	0	0	0	1	0	0	0	0	0	0	0	0	0	0	0	0	0	0	0	0	0	0	0	0
RNF31	0	0	0	0	0	0	0	0	0	0	0	0	0	0	0	0	0	0	0	0	0	0	0	0	0	0	0	0	2	1	2	0	5	0	0	0	0	0	0	0	0	1	0	0	0	0	0	0	0
TNRC6A	0	0	0	0	0	0	0	0	0	0	0	0	0	0	0	0	0	0	0	0	0	0	0	0	0	0	0	0	3	3	2	0	1	0	0	0	0	0	0	0	0	0	0	0	0	0	0	0	0
TNRC6B	0	0	0	0	0	0	0	0	0	0	0	0	0	0	0	0	0	0	0	0	0	0	0	0	0	0	0	0	5	5	3	0	2	0	0	0	0	0	0	0	0	0	0	0	0	0	0	0	0
TRIP6	0	0	0	0	0	0	0	0	0	0	0	0	0	0	0	0	0	0	0	0	0	0	0	0	0	0	0	0	1	1	0	0	0	0	0	0	0	0	0	0	0	2	0	0	0	0	0	0	0
UAP1	0	0	0	0	0	0	0	0	0	0	0	0	0	0	0	0	0	0	0	0	0	0	0	0	0	0	0	0	1	0	0	0	0	0	0	0	0	0	0	0	0	0	0	0	0	0	0	0	0
ARHGEF1	0	0	0	0	0	0	0	0	0	0	0	0	0	0	0	0	0	0	0	0	0	0	0	0	0	0	0	0	0	1	0	0	0	0	0	0	0	0	0	0	0	0	0	0	0	0	0	0	0
CCDC14	0	0	0	0	0	0	0	0	0	0	0	0	0	0	0	0	0	0	0	0	0	0	0	0	0	0	0	0	0	3	0	0	2	0	0	0	0	0	0	0	0	0	0	0	0	0	0	0	0
CCDC150	0	0	0	0	0	0	0	0	0	0	0	0	0	0	0	0	0	0	0	0	0	0	0	0	0	0	0	0	0	1	0	0	0	0	0	0	0	0	0	0	0	0	0	0	0	0	0	0	0
CHAF1B	0	0	0	0	0	0	0	0	0	0	0	0	0	0	0	0	0	0	0	0	0	0	0	0	0	0	0	0	0	1	0	0	0	0	0	0	0	0	0	0	0	0	0	0	0	0	0	0	0
CKAP2	0	0	0	0	0	0	0	0	0	0	0	0	0	0	0	0	0	0	0	0	0	0	0	0	0	0	0	0	0	1	0	0	1	0	0	0	0	1	0	0	2	5	0	1	1	0	0	0	0
CLINT1	0	0	0	0	0	0	0	0	0	0	0	0	0	0	0	0	0	0	0	0	0	0	0	0	0	0	0	0	0	1	0	0	0	0	0	0	0	0	0	0	0	0	0	0	0	0	0	0	0
CSPP1	0	0	0	0	0	0	0	0	0	0	0	0	0	0	0	0	0	0	0	0	0	0	0	0	0	0	0	0	0	1	0	0	0	0	0	0	0	0	0	0	0	0	0	0	0	0	0	0	0
DBNL	0	0	0	0	0	0	0	0	0	0	0	0	0	0	0	0	0	0	0	0	0	0	0	0	0	0	0	0	0	1	0	0	0	0	0	0	0	0	0	0	0	0	0	0	0	0	0	0	0
DVL2	0	0	0	0	0	0	0	0	0	0	0	0	0	0	0	0	0	0	0	0	0	0	0	0	0	0	0	0	0	1	0	0	0	0	0	0	0	0	0	0	0	0	0	0	0	0	0	0	0
EIF2B2	0	0	0	0	0	0	0	0	0	0	0	0	0	0	0	0	0	0	0	0	0	0	0	0	0	0	0	0	0	1	0	0	0	0	0	0	0	0	0	0	0	0	0	0	0	0	0	0	0
FAM83H	0	0	0	0	0	0	0	0	0	0	0	0	0	0	0	0	0	0	0	0	0	0	0	0	0	0	0	0	0	2	0	0	1	0	0	0	0	0	0	0	0	0	0	0	0	0	0	0	0
GCC2	0	0	0	0	0	0	0	0	0	0	0	0	0	0	0	0	0	0	0	0	0	0	0	0	0	0	0	0	0	1	0	0	0	0	0	0	0	0	0	0	0	0	0	0	0	0	0	0	0
GLUL	0	0	0	0	0	0	0	0	0	0	0	0	0	0	0	0	0	0	0	0	0	0	0	0	0	0	0	0	0	1	0	0	0	0	0	0	0	0	0	0	1	0	0	0	0	0	0	0	0
HDLBP	0	0	0	0	0	0	0	0	0	0	0	0	0	0	0	0	0	0	0	0	0	0	0	0	0	0	0	0	0	1	0	0	0	0	0	0	0	0	0	0	1	0	0	0	0	0	0	0	0
MAP2K6	0	0	0	0	0	0	0	0	0	0	0	0	0	0	0	0	0	0	0	0	0	0	0	0	0	0	0	0	0	1	0	0	0	0	0	0	0	0	0	0	0	0	0	0	0	0	0	0	0
MLH1	0	0	0	0	0	0	0	0	0	0	0	0	0	0	0	0	0	0	0	0	0	0	0	0	0	0	0	0	0	1	0	0	0	0	0	0	0	0	0	0	0	0	0	0	0	0	0	0	0
POLR1B	0	0	0	0	0	0	0	0	0	0	0	0	0	0	0	0	0	0	0	0	0	0	0	0	0	0	0	0	0	1	0	0	0	0	0	0	1	0	0	0	0	1	0	1	0	0	0	0	0
PRIM1	0	0	0	0	0	0	0	0	0	0	0	0	0	0	0	0	0	0	0	0	0	0	0	0	0	0	0	0	0	1	0	0	0	0	0	0	0	0	0	0	1	1	0	0	0	0	0	0	0
RGPD1	0	0	0	0	0	0	0	0	0	0	0	0	0	0	0	0	0	0	0	0	0	0	0	0	0	0	0	0	0	1	0	0	0	0	0	0	0	0	0	0	0	0	0	0	0	0	0	0	0
SASS6	0	0	0	0	0	0	0	0	0	0	0	0	0	0	0	0	0	0	0	0	0	0	0	0	0	0	0	0	0	1	0	0	0	0	0	0	0	0	0	0	2	2	0	0	0	0	0	0	0
SIPA1L1	0	0	0	0	0	0	0	0	0	0	0	0	0	0	0	0	0	0	0	0	0	0	0	0	0	0	0	0	0	1	0	0	0	0	0	0	0	0	0	0	0	0	0	0	0	0	0	0	0
SNX9	0	0	0	0	0	0	0	0	0	0	0	0	0	0	0	0	0	0	0	0	0	0	0	0	0	0	0	0	0	1	0	0	0	0	0	0	0	0	0	0	0	0	0	0	0	0	0	0	0
STOML3	0	0	0	0	0	0	0	0	0	0	0	0	0	0	0	0	0	0	0	0	0	0	0	0	0	0	0	0	0	1	0	0	0	1	0	0	0	0	0	0	0	0	0	0	0	0	0	0	0
TEX9	0	0	0	0	0	0	0	0	0	0	0	0	0	0	0	0	0	0	0	0	0	0	0	0	0	0	0	0	0	1	0	0	0	0	0	0	0	0	0	0	1	0	0	0	0	0	0	0	0
TRMT1L	0	0	0	0	0	0	0	0	0	0	0	0	0	0	0	0	0	0	0	0	0	0	0	0	0	0	0	0	0	1	0	0	0	0	0	0	1	0	0	0	0	0	0	0	0	0	0	0	0
TYMS	0	0	0	0	0	0	0	0	0	0	0	0	0	0	0	0	0	0	0	0	0	0	0	0	0	0	0	0	0	1	0	0	0	0	0	0	0	0	0	0	0	0	0	0	0	0	0	0	0
YTHDF3	0	0	0	0	0	0	0	0	0	0	0	0	0	0	0	0	0	0	0	0	0	0	0	0	0	0	0	0	0	1	0	0	0	0	0	0	0	0	0	0	0	0	0	0	0	0	0	0	0
ACTG1	0	0	0	0	0	0	0	0	0	0	0	0	0	0	0	0	0	0	0	0	0	0	0	0	0	0	0	0	0	0	20	16	26	0	0	0	16	0	58	0	4	18	0	65	64	0	24	0	0
F10	0	0	0	0	0	0	0	0	0	0	0	0	0	0	0	0	0	0	0	0	0	0	0	0	0	0	0	0	0	0	0	1	1	0	0	0	0	0	0	0	0	0	0	0	0	0	0	0	0
KHDRBS3	0	0	0	0	0	0	0	0	0	0	0	0	0	0	0	0	0	0	0	0	0	0	0	0	0	0	0	0	0	0	0	1	0	0	0	0	0	0	0	1	0	0	0	0	0	0	0	0	0
BAIAP2L1	0	0	0	0	0	0	0	0	0	0	0	0	0	0	0	0	0	0	0	0	0	0	0	0	0	0	0	0	0	0	0	0	1	0	0	0	0	0	0	0	1	1	0	0	1	0	0	0	0
BRK1	0	0	0	0	0	0	0	0	0	0	0	0	0	0	0	0	0	0	0	0	0	0	0	0	0	0	0	0	0	0	0	0	1	0	0	0	0	0	0	0	0	0	0	0	0	0	0	0	0
CCDC112	0	0	0	0	0	0	0	0	0	0	0	0	0	0	0	0	0	0	0	0	0	0	0	0	0	0	0	0	0	0	0	0	1	0	0	0	0	0	0	0	2	1	0	0	0	0	0	0	0
CCDC15	0	0	0	0	0	0	0	0	0	0	0	0	0	0	0	0	0	0	0	0	0	0	0	0	0	0	0	0	0	0	0	0	1	0	0	0	0	0	0	0	0	0	0	0	0	0	0	0	0
CYLD	0	0	0	0	0	0	0	0	0	0	0	0	0	0	0	0	0	0	0	0	0	0	0	0	0	0	0	0	0	0	0	0	4	0	0	0	0	0	0	0	0	0	0	0	0	0	0	0	0
DBN1	0	0	0	0	0	0	0	0	0	0	0	0	0	0	0	0	0	0	0	0	0	0	0	0	0	0	0	0	0	0	0	0	1	0	0	0	0	0	1	0	0	0	0	0	0	0	0	0	0
DDX39B	0	0	0	0	0	0	0	0	0	0	0	0	0	0	0	0	0	0	0	0	0	0	0	0	0	0	0	0	0	0	0	0	1	0	0	0	0	0	0	0	0	0	0	0	0	0	0	0	0
FARP1	0	0	0	0	0	0	0	0	0	0	0	0	0	0	0	0	0	0	0	0	0	0	0	0	0	0	0	0	0	0	0	0	1	0	0	0	0	0	0	0	0	0	0	0	0	0	0	0	0
KIAA0355	0	0	0	0	0	0	0	0	0	0	0	0	0	0	0	0	0	0	0	0	0	0	0	0	0	0	0	0	0	0	0	0	1	0	0	0	0	0	0	0	1	0	0	0	0	0	0	0	0
LNX2	0	0	0	0	0	0	0	0	0	0	0	0	0	0	0	0	0	0	0	0	0	0	0	0	0	0	0	0	0	0	0	0	2	0	0	0	0	0	0	0	1	0	0	0	0	0	0	0	0
NMT2	0	0	0	0	0	0	0	0	0	0	0	0	0	0	0	0	0	0	0	0	0	0	0	0	0	0	0	0	0	0	0	0	1	0	0	0	0	0	0	0	0	0	0	0	0	0	0	0	0
PROSER1	0	0	0	0	0	0	0	0	0	0	0	0	0	0	0	0	0	0	0	0	0	0	0	0	0	0	0	0	0	0	0	0	1	0	0	0	0	0	0	0	0	0	0	0	0	0	0	0	0
[truncated: 486 more rows]
[truncated: 38 more columns]
